# Supplementary material for: Ionic vs. van der Waals layered materials: identification and comparison of elastic anisotropy
Source: Royal Society of Chemistry journal article supplement (doi:10.1039/c8ta04933e), 2018-01-01
Supplement: c8ta04933e1.csv [file c8ta04933e1.csv]

compound	icsd	spacer1	spacer2	spacer3	layering_dir_h	layering_dir_k	layering_dir_l	stoichiometry	crystal_structure	space_group_number	space_group	density	volume_per_atom	mass_per_atom	number_of_atoms	bandgap	avg_coordination_number	BV	BR	BH	GV	GR	GH	AU	Youngs_iso	Youngs_min_x	Youngs_min_y	Youngs_min_z	Youngs_max_x	Youngs_max_y	Youngs_max_z	Youngs_min	Youngs_max	Youngs_avg	Youngs_std	Youngs_std_rel	Youngs_out	Youngs_in	Youngs_ratio	C11	C12	C13	C14	C15	C16	C21	C22	C23	C24
Ag1Al1S2	icsd_025356	Al	Ag	S	0	0	1	112	trigonal	156	P3m1 (156)	4.371759	18.894773	82.603393	4	1.8376	5	72.702188	71.778378	72.240283	32.900231	26.843054	29.871642	1.141128	78.759183	0	-0.743294	-0.668965	0	0	-1	54.828297	140.044656	71.055719	15.880931	0.2235	140.044656	99.320602	1.410026	120.42964	44.48366	41.01592	0.99939	-0.02366	0.02917	44.48366	120.39943	41.02023	-0.98836
Ag1As1Ba1	icsd_008278	Ba			0	0	1	111	hexagonal	194	P6_3/mmc (194)	6.129513	28.907483	177.188787	6	0	10	41.834968	38.849881	40.342424	23.226305	22.776753	23.001529	0.175523	57.984492	0	0	-1	-1	0	0	49.718677	61.478023	57.337262	2.858579	0.049856	49.718677	60.807351	0.817643	82.16866	39.09501	19.56849	-0.00353	-0.00074	0.00075	39.09501	82.01764	19.49365	-0.00368
Ag1As1Se2	icsd_020087	Ag	As		0	0	1	112	trigonal	166	R-3m (166)	6.376607	22.181148	141.440459	4	0.1681	6	59.848668	58.930749	59.389709	24.651661	20.942983	22.797322	0.900999	60.633687	-0.62706	-0.348367	0.696733	0	-0.961524	0.274721	41.254609	85.297953	57.576338	12.070301	0.20964	50.424042	72.869714	0.691975	104.71291	38.49197	43.66383	7.7823	0.06138	0.0957	38.49197	104.94914	43.78183	-7.87976
Ag1As1Sr1	icsd_049742	Sr			0	0	1	111	hexagonal	194	P6_3/mmc (194)	5.81747	25.728594	149.67532	6	0	9.833333	49.31354	43.965703	46.639622	23.25844	21.85258	22.55551	0.443306	58.272722	0	0	-1	-0.995037	-0.099504	0	55.172256	56.69031	56.253725	0.338845	0.006024	55.172256	56.596278	0.974839	92.6037	56.70394	21.03166	-0.00301	-0.00041	0.01128	56.70394	92.55585	21.04457	-0.0033
Ag1As2La1	icsd_420609	La	Ag	As	0	0	1	112	orthorhombic	57	Pmca (57)	6.886489	23.909051	164.649424	32	0	9.5625	64.245756	63.47199	63.858873	38.475237	37.470966	37.973102	0.146197	95.074284	0	0	-1	-1	0	0	72.686633	114.834732	94.68703	7.676682	0.081074	72.686633	101.362796	0.717094	134.23018	31.14029	40.85906	-0.01256	0.00525	0.00466	31.14029	122.87655	41.54567	-0.01551
Ag1Ba1Bi1	icsd_056978	Ba			0	0	1	111	hexagonal	194	P6_3/mmc (194)	7.250931	34.670318	251.392066	6	0	10	33.784581	30.007725	31.896153	16.420743	15.48834	15.954541	0.426864	41.023588	0	0	-1	-0.818182	-0.181818	-0.545455	34.571741	41.527237	39.968966	1.289357	0.032259	34.571741	39.265877	0.880453	63.14144	37.14591	16.0944	0.00627	0.00362	0.18864	37.14591	62.65904	16.02607	0.00651
Ag1Ba1P1	icsd_041706	Ba			0	0	1	111	hexagonal	194	P6_3/mmc (194)	5.66411	26.988014	152.863091	6	0.3937	10	48.379859	46.560691	47.470275	30.933617	30.304937	30.619277	0.142797	75.602739	0	0	-1	-0.406138	0.913812	0	61.050037	87.405828	75.283273	7.842736	0.104176	61.050037	87.391289	0.698583	101.61751	31.29117	24.82061	-0.00099	-0.00056	-0.00429	31.29117	101.6203	24.81881	-0.00026
Ag1Ba1Sb1	icsd_056981	Ba			0	0	1	111	hexagonal	194	P6_3/mmc (194)	6.191844	32.803549	203.114447	6	0.0913	9.833333	38.269513	34.983379	36.626446	25.056132	24.037532	24.546832	0.305811	60.193406	0	0	-1	-0.83205	-0.5547	0	41.593497	73.392817	60.134061	9.018778	0.149978	41.593497	73.264113	0.56772	85.06769	25.88219	18.73906	-0.00305	0.00079	0.01195	25.88219	84.7486	18.72031	-0.00315
Ag1Bi1Ca1	icsd_416283	Ca	Bi		0	0	1	111	hexagonal	186	P6_3mc (186)	7.170374	27.552744	197.563487	6	0.0509	8.666667	42.503887	40.925938	41.714912	20.8942	19.57487	20.234535	0.375552	52.254607	-0.707107	0.707107	0	0	0	-1	46.684393	56.621382	50.893683	2.840714	0.055817	56.621382	46.984834	1.205099	74.63413	43.90228	20.75261	0.00371	0.00869	0.04277	43.90228	74.2538	20.29704	-0.00341
Ag1Bi1S2	icsd_044340	Ag	Bi		0	0	1	112	trigonal	164	P-3m1 (164)	6.88982	22.955236	158.157435	12	0.8465	6	57.050978	55.048308	56.049643	19.372065	17.265709	18.318887	0.646362	49.557633	0	-0.624695	0.780869	-0.274721	-0.961524	0	37.488663	67.284087	47.355177	9.810721	0.207173	45.759398	67.248284	0.680455	96.95598	44.69327	40.34262	-0.25065	-0.01512	-0.01672	44.69327	96.98762	40.35105	0.23069
Ag1Bi1Se2	icsd_026518	Ag	Bi		1	1	1	112	trigonal	166	R-3m (166)	7.665746	25.710859	197.092918	4	0.4605	6	51.035444	49.73869	50.387067	18.422743	17.188899	17.805821	0.384978	47.788307	-0.863868	-0.259161	0.431934	0	-0.894427	0.447214	37.463056	60.308242	46.894892	7.273524	0.155103	38.44752	49.383675	0.778547	63.48447	39.11184	37.20366	1.92142	-1.35234	-2.2162	39.11184	82.57744	37.37564	-2.90196
Ag1Bi1Se2	icsd_604855	Ag	Bi		0	0	1	112	trigonal	164	P-3m1 (164)	7.685471	25.644872	197.092918	12	0.6265	6	51.328709	50.01265	50.670679	19.721831	18.410735	19.066283	0.382383	50.82417	0	0	-1	0	-0.957826	0.287348	39.629377	64.460108	50.029405	7.256538	0.145045	39.629377	58.63028	0.67592	86.40274	37.91652	37.67864	3.91478	-0.00141	-0.01392	37.91652	86.44508	37.71632	-3.94946
Ag1Bi1Te2	icsd_043266	Ag	Bi		0	0	1	112	trigonal	166	R-3m (166)	7.796399	30.459859	237.477221	4	0.2631	6	43.26268	42.901085	43.081883	17.300474	16.11513	16.707802	0.376202	44.385605	0	0	-1	0	-0.919145	0.393919	35.277371	56.88662	43.798972	5.936985	0.135551	35.277371	47.553388	0.741848	70.50644	30.14876	32.68806	4.24113	0.1182	0.1815	30.14876	70.96807	32.8315	-4.47303
Ag1Bi6S9	icsd_069456	Ag	S		2	0	1	169	monoclinic	12	C2/m (12)	6.47852	26.437811	171.277892	16	0	4.9375	37.641282	33.09002	35.365651	16.873985	12.94043	14.907208	1.657412	39.212106	-0.1849	0.64715	-0.7396	0	-1	0	19.740045	63.512199	36.865323	11.70841	0.3176	33.458905	39.933038	0.837875	56.26451	26.77321	27.44724	-0.01742	-8.08832	-0.44528	26.77321	77.74481	20.57608	0.10475
Ag1Br2Cs1	icsd_040480	Cs			1	0	0	112	orthorhombic	63	Ccmm (63)	4.594664	36.193144	166.295342	8	2.551	6.5	14.432992	14.332166	14.382579	5.438521	4.103031	4.770776	1.634479	12.88739	-0.707107	0.707107	0	0	-0.707107	0.707107	5.861739	18.391141	11.989812	3.573651	0.298057	16.211796	16.889009	0.959902	22.58154	8.97721	11.37968	3.00E-05	0.00063	0.06338	8.97721	21.22276	11.1015	-7.00E-05
Ag1Br2Cs1	icsd_150302	Cs	Br		0	0	1	112	tetragonal	129	P4/nmm (129)	4.375744	38.003898	166.295342	8	2.3319	8.5	14.68081	14.438922	14.559866	5.536652	4.248052	4.892352	1.533448	13.198726	-1	0	0	-0.613941	0.789352	0	7.06906	22.476014	12.411838	3.123153	0.251627	18.743207	15.240644	1.229817	16.83565	14.16354	10.59053	0.00026	0.01117	-0.0007	14.16354	24.53217	7.88109	-0.00581
Ag1Br5Pb2	icsd_300100	Pb	Br		1	0	0	125	monoclinic	15	C2/c (15)	6.168876	31.015881	191.333132	16	2.5139	4.875	24.715048	23.981817	24.348432	7.593449	6.638561	7.116005	0.749773	19.452928	-0.40161	0.722897	-0.562254	-0.919145	0	-0.393919	12.032527	30.247307	18.839928	3.958796	0.210128	24.948136	16.504732	1.511575	40.28631	18.52536	20.12348	0.09934	0.82958	0.03835	18.52536	32.51974	19.63458	0.08511
Ag1Cl2Cs1	icsd_150299	Cs			0	1	0	112	orthorhombic	63	Ccmm (63)	4.079512	31.716795	129.389037	8	2.976	6.5	16.931359	16.835339	16.883349	6.299411	4.552214	5.425813	1.924767	14.702459	-0.707107	0.707107	0	-0.743294	0	0.668965	6.148921	20.74567	13.547936	4.370138	0.322569	18.674194	19.503088	0.957499	25.33996	10.57924	12.74738	0.00696	-0.00253	0.1313	10.57924	26.33578	13.50064	0.0037
Ag1Cr3O8	icsd_155507	Ag			0	0	1	138	monoclinic	12	C2/m (12)	3.747392	14.469729	54.223745	12	0	2.666667	53.02192	24.987771	39.004846	26.570804	13.709503	20.140153	5.812567	51.548162	-0.40161	0.562254	0.722897	0	-1	0	16.446772	124.031348	47.588609	28.265008	0.593945	26.067486	60.655972	0.42976	89.19161	45.58196	21.55742	-0.06296	18.03418	-0.10891	45.58196	156.88869	28.11805	-0.01057
Ag1Cs2F4	icsd_016254	Cs	F		0	0	1	124	tetragonal	139	I4/mmm (139)	4.787131	22.282923	106.671284	7	0	8	26.947573	26.945651	26.946612	9.957542	9.101984	9.529763	0.470055	25.574458	0	-0.936329	0.351123	0	0	-1	19.746414	38.025231	25.070408	3.360563	0.134045	38.025231	26.188161	1.452001	38.06557	25.58314	16.79525	0.00309	0.04838	-0.0144	25.58314	38.02604	17.26452	0.0534
Ag1Ge1La1	icsd_056985	La	Ag		0	0	1	111	hexagonal	186	P6_3mc (186)	6.995815	25.272194	176.799596	6	0	10	64.305104	60.695031	62.500068	36.625379	35.754589	36.189984	0.181252	91.004833	0	0	-1	-0.970143	0	-0.242536	63.198638	99.18959	91.718375	8.934093	0.097408	63.198638	98.648447	0.640645	125.16497	47.43563	38.31182	-0.00653	0.00767	-0.035	47.43563	125.14872	38.35529	-0.00718
Ag1In1S2	icsd_659385	In	Ag		0	0	1	112	trigonal	166	R-3m (166)	5.768315	20.641617	119.067356	4	0.4868	6	62.988957	62.107497	62.548227	21.68713	12.82266	17.254895	3.470757	47.405505	-0.62706	-0.348367	0.696733	-0.854358	0.512615	0.085436	22.352632	84.361418	39.281378	18.309281	0.466106	67.1289	82.918863	0.809573	111.20816	45.06525	41.33893	2.75419	-0.00661	-0.01652	45.06525	111.15149	41.35913	-2.75854
Ag1K1Se1	icsd_052586	K	Ag	Se	0	0	1	111	tetragonal	129	P4/nmm (129)	4.584836	27.2754	125.053238	6	0.8061	10	25.776526	25.766772	25.771649	13.130623	12.563642	12.847133	0.226022	33.049661	0	0	-1	0	-1	0	26.995635	38.438305	32.393003	2.229705	0.068833	26.995635	33.564919	0.804281	47.71772	9.79407	19.25569	0.00394	-0.00673	-0.00143	9.79407	47.74836	19.26522	0.00289
Ag1La1Sb2	icsd_095223	La	Ag	Sb	0	0	1	112	tetragonal	129	P4/nmm (129)	7.231386	28.146459	203.537913	8	0	10	56.001818	52.9207	54.461259	33.495391	30.618804	32.057097	0.527963	80.396841	0	0	-1	-0.743294	-0.668965	0	51.297199	109.377468	81.302607	13.641996	0.167793	51.297199	94.262753	0.544194	104.63547	44.01307	32.36561	-0.00509	-0.01302	0.02204	44.01307	102.65829	37.84075	-0.00412
Ag1O3Sb1	icsd_245292	Ag			0	0	1	113	trigonal	148	R-3 (148)	6.402437	14.401061	92.201881	10	0.9519	5.4	94.499678	79.786959	87.143318	28.835387	2.265114	15.55025	58.835477	44.03168	0	-0.707107	-0.707107	-0.816497	0.571548	0.08165	3.346786	113.441772	15.252554	24.344931	1.596122	81.428342	101.579735	0.80162	187.77868	94.48951	47.05395	4.42077	0.21471	-0.00394	94.48951	188.05931	47.20543	-4.46693
Ag1P1Sr1	icsd_052596	Sr			0	0	1	111	hexagonal	194	P6_3/mmc (194)	5.241526	23.91472	125.349624	6	0.3143	10	55.22504	50.568737	52.896888	33.941656	32.855049	33.398352	0.257443	82.774229	0	0	-1	0	-1	0	65.392019	100.585495	81.896449	11.116092	0.135733	65.392019	100.507327	0.650619	119.91561	43.58663	24.33036	-0.00639	-0.00069	0.00648	43.58663	119.97315	24.33474	-0.00668
Ag1Sb1Sr1	icsd_056990	Ag			0	0	1	111	hexagonal	194	P6_3/mmc (194)	5.634039	31.167867	175.60098	6	0.5345	10	31.214587	29.810996	30.512791	18.679512	11.447189	15.06335	3.206078	38.804474	-0.707107	-0.707107	0	0	-0.83205	0.5547	14.706937	67.984052	33.469661	13.066271	0.390391	43.676833	27.316174	1.598937	59.23152	7.75177	8.26999	-0.00958	0.00452	-0.00723	7.75177	76.57432	28.97643	-0.00655
Ag1Sb1Te2	icsd_170663	Ag	Sb		0	0	1	112	trigonal	166	R-3m (166)	6.914843	29.106806	201.269007	4	0	6	45.966713	45.274323	45.620518	17.827068	14.891192	16.35913	1.001069	43.837475	0	0	-1	-0.755263	-0.419591	-0.503509	25.337657	67.744284	43.123099	9.103182	0.211098	25.337657	41.819351	0.605884	72.91334	31.5969	38.62774	7.43264	0.315	1.06721	31.5969	72.74314	37.25035	-6.86514
Ag1Sc6Te2	icsd_094859	Sc			1	0	0	126	orthorhombic	62	Pnma (62)	4.690263	24.893059	116.755004	36	0	7.694444	64.436259	64.327339	64.381799	32.863185	30.684203	31.773694	0.356759	81.855339	-0.707107	0	-0.707107	-0.780869	-0.624695	0	61.159505	101.289741	80.992902	9.556993	0.117998	81.443016	84.031755	0.969193	109.63076	49.0633	38.6731	-0.01057	0.07698	0.00366	49.0633	94.40976	44.30958	0.01252
Ag1Sn1Y1	icsd_245234	Sn			0	0	1	111	hexagonal	186	P6_3mc (186)	6.955712	25.105194	174.6245	6	0	8.666667	65.126869	63.330093	64.228481	36.847343	35.544756	36.19605	0.211604	91.415672	0	0	-1	0	-0.743294	0.668965	83.114738	95.408629	90.819437	3.750237	0.041293	83.114738	84.581381	0.98266	117.31099	57.61787	34.79775	0.00038	-0.00827	-0.09327	57.61787	117.26599	34.87165	-0.02005
Ag1Te2Tl1	icsd_043284	Tl	Ag	Te	0	0	1	112	tetragonal	119	I-4m2 (119)	7.753939	30.380534	235.568806	4	0	7	34.518038	31.443308	32.980673	12.703871	12.224869	12.46437	0.293699	33.209493	-0.274721	-0.961524	0	-0.109764	-0.109764	-0.987878	26.431694	42.688883	33.343532	4.427539	0.132786	42.456905	27.59928	1.538334	41.90091	21.49083	28.78276	0.0926	0.40451	-0.73106	21.49083	41.90001	28.81283	0.48761
Ag1Te2Tl3	icsd_061680	Tl			1	0	0	123	monoclinic	14	P2_1/c (14)	8.197549	32.957981	270.174669	24	0.6794	8.958333	21.184272	19.087241	20.135756	7.582971	6.906849	7.24491	0.599324	19.407146	-0.505076	-0.808122	-0.303046	-0.141421	0	-0.989949	13.530401	26.883721	19.050427	3.430703	0.180085	19.702815	20.726235	0.950622	31.90916	14.42495	18.57903	-0.00297	-2.28105	0.00211	14.42495	22.60751	15.10684	-0.01399
Ag1Te2Y1	icsd_605920	Y	Te		0	0	1	112	tetragonal	113	P-42_1m (113)	5.959045	31.48661	187.63011	8	1.1301	5	38.781786	38.708258	38.745022	19.439919	17.376508	18.408213	0.595636	47.674416	0	0	-1	-0.650945	0.650945	0.390567	31.835216	59.231661	48.491878	6.714903	0.138475	31.835216	47.317626	0.672798	57.70695	30.0427	30.21715	0.01257	-0.00572	-0.0006	30.0427	57.71683	30.2221	0.0096
Ag1Te2Y6	icsd_160181	Y			1	0	0	126	orthorhombic	62	Pnma (62)	5.345625	30.94282	165.408722	36	0	7.055556	51.478257	51.093916	51.286086	25.829156	21.668793	23.748975	0.967512	61.720052	0	-1	0	-0.743294	0.668965	0	35.678137	88.987619	61.250909	11.339327	0.185129	42.688642	57.509483	0.742289	80.44694	50.10432	31.86788	-0.00863	-0.04526	-0.02268	50.10432	68.54431	31.05321	0.00665
Ag2Ba1Ge2	icsd_025318	Ba	Ag		0	0	1	122	tetragonal	139	I4/mmm (139)	6.870085	24.090489	165.503708	5	0	11.6	50.478491	50.240106	50.359298	31.663611	30.43398	31.048795	0.206761	77.266873	0	0	-1	0	-0.759257	0.650791	63.00861	88.715974	77.650576	7.01529	0.090344	63.00861	67.725364	0.930355	89.39483	21.601	36.35971	0.13148	0.06664	0.09045	21.601	89.42216	36.35851	0.0391
Ag2Ba1S2	icsd_050183	Ba	Ag		0	0	1	122	trigonal	164	P-3m1 (164)	5.517656	25.110874	138.553164	5	1.2883	5.6	46.588922	46.482176	46.535549	21.457703	20.277445	20.867574	0.293324	54.462057	-0.690268	-0.383482	-0.613572	0	-0.970143	-0.242536	42.802868	64.211682	52.802684	5.7483	0.108864	61.726636	59.717579	1.033643	77.26185	27.77723	31.98987	-3.86464	0.03334	-0.03076	27.77723	77.26404	32.00859	3.85647
Ag2Ba1Sn2	icsd_025332	Ba	Ag		0	0	1	122	tetragonal	139	I4/mmm (139)	6.948158	28.223899	196.104117	5	0	11.4	43.706956	43.444592	43.575774	18.752689	12.14106	15.446875	2.728878	41.443605	-0.455842	0.569803	0.683763	0	-0.995037	0.099504	16.010904	65.457929	36.520136	12.9339	0.354158	50.116866	53.646322	0.934209	79.71168	14.76101	32.79041	2.06614	-2.10344	-0.02854	14.76101	79.86703	32.86994	-2.41975
Ag2Ca4Si6	icsd_410522	Ca			0	0	1	246	orthorhombic	69	Fmmm (69)	3.462765	21.761638	75.355444	12	0	10	64.42844	55.005773	59.717106	41.62335	37.38291	39.50313	0.738466	97.098933	-0.447214	0	0.894427	0	-1	0	69.168551	141.64559	94.209178	22.000995	0.233533	71.598012	136.263932	0.525436	155.94613	48.3262	23.5974	-0.0006	0.00256	-0.00546	48.3262	159.54694	21.9341	0.00088
Ag2Cs1I3	icsd_014202	Ag			0	1	0	123	orthorhombic	62	Pbnm (62)	4.573671	44.133867	201.853783	24	2.5222	6.166667	7.397097	6.613173	7.005135	3.272904	2.945809	3.109356	0.673727	8.125807	0	-1	0	-0.548821	-0.329293	-0.76835	4.713933	10.31761	8.273967	1.483819	0.179336	4.713933	8.883547	0.530636	11.08754	4.78716	6.86652	0.01127	0.00032	0.04911	4.78716	7.49502	5.54624	0.02372
Ag2Cu2O3	icsd_087609	O			0	0	1	223	tetragonal	141	I4_1/amd (141)	6.757046	13.720762	92.711818	14	0	3.428571	102.32941	91.610089	96.96975	15.968324	4.502617	10.23547	12.849281	29.662745	-0.646762	0.646762	-0.404226	0	0	-1	7.974909	122.149487	14.822495	11.613606	0.783512	122.149487	22.994804	5.312047	121.91895	61.77076	87.2273	0.01451	-0.33924	0.01569	61.77076	121.81724	87.1471	0.00289
Ag2Hf1S3	icsd_079251	Hf	Ag		0	0	1	123	orthorhombic	64	Cmce (64)	6.350794	21.371706	135.727292	24	1.6557	4.666667	61.951126	60.172105	61.061615	21.400181	18.093496	19.746839	0.943343	53.475951	0	-0.707107	-0.707107	0	-1	0	35.115096	76.512268	49.371076	11.254833	0.227964	67.564794	72.696552	0.929409	97.29022	49.19388	33.15191	0.00198	-0.00698	0.0162	49.19388	112.96074	46.76781	0.00342
Ag2La1Si2	icsd_052587	La	Ag		0	0	1	122	tetragonal	139	I4/mmm (139)	6.613022	20.631135	136.434141	5	0	11.6	80.025986	80.020721	80.023353	48.245937	42.468634	45.357286	0.68025	114.448666	0	-1	0	-0.523205	-0.523205	0.672692	72.733688	142.960681	116.740068	16.885032	0.144638	105.559456	94.663914	1.115097	117.48398	68.86182	52.96784	0.79374	-0.57377	-0.11582	68.86182	117.43322	52.98025	-0.57602
Ag2S3Si1	icsd_180764	Si	S		0	0	1	123	monoclinic	14	P2_1/c (14)	3.978819	23.650705	94.101875	24	1.8695	3.625	24.278627	19.996574	22.1376	10.397356	9.247777	9.822567	0.835683	25.670926	0	-1	0	-0.847998	0	-0.529999	15.820187	39.291779	25.628382	6.100655	0.238043	31.234524	21.438071	1.456965	44.83336	16.74867	21.81199	-0.03335	7.58906	0.10968	16.74867	23.30052	14.51422	-0.00999
Ag2Si2Sr1	icsd_025330	Sr	Ag		0	0	1	122	tetragonal	139	I4/mmm (139)	5.703971	20.933108	119.401838	5	0	11.4	63.797719	63.253833	63.525776	39.118385	37.311856	38.215121	0.250684	95.496188	-0.986394	0	-0.164399	-0.070535	0.705346	-0.705346	76.293636	115.821062	96.375368	10.417029	0.108088	95.822456	82.144347	1.166513	102.17706	38.93382	42.53105	5.64652	-5.48522	-0.48672	38.93382	102.37059	42.58655	-5.48356
Ag2Sn2Sr1	icsd_000414	Sr	Ag		0	0	1	122	tetragonal	139	I4/mmm (139)	6.713218	26.7526	179.596037	5	0	11.4	46.657323	45.797274	46.227299	18.753454	16.608973	17.681214	0.664358	47.045577	-0.445976	0.668965	0.594635	0	-0.993884	0.110432	33.816258	65.359786	43.451133	6.300428	0.145	60.028905	49.182627	1.220531	79.13758	18.45123	34.83051	1.999	-2.44032	0.06102	18.45123	79.30637	34.94151	-2.67895
Ag3As2K3	icsd_032016	K	Ag		0	0	1	233	trigonal	166	R-3m (166)	4.206163	29.152197	122.618895	8	1.3382	11.75	21.508543	21.205551	21.357047	11.759496	6.462412	9.110954	4.112669	23.930001	-0.737865	-0.421637	-0.527046	-0.777778	0.444444	-0.444444	9.705713	43.043447	19.778361	7.80909	0.39483	32.442943	18.944996	1.712481	36.12966	10.43036	14.69399	-8.2685	0.00598	-0.00655	10.43036	36.11113	14.68639	8.25908
Ag3Cs1S2	icsd_001033	Cs	Ag		0	0	1	123	monoclinic	12	C2/m (12)	5.617293	25.651236	144.0905	12	0.7123	11.416667	27.233318	26.595179	26.914248	12.032195	10.22148	11.126837	0.909735	29.337612	-0.502571	0.646162	0.574367	-0.986394	0	0.164399	17.955246	45.303496	27.538932	5.92203	0.215042	28.865381	30.536115	0.945287	53.16263	16.22285	17.76956	-0.01927	-2.10365	-0.00886	16.22285	49.00187	17.85836	-0.01245
Ag3Cs1Se2	icsd_052558	Cs	Ag		0	0	1	123	monoclinic	12	C2/m (12)	6.100047	27.876424	170.047488	12	0.4675	11.333333	23.679112	23.192711	23.435911	11.057075	9.384946	10.221011	0.911829	26.771165	-0.445976	-0.594635	0.668965	-0.961524	0	0.274721	17.071903	39.863689	25.258726	5.315665	0.210449	23.124504	27.929444	0.827961	43.76912	12.7786	15.61918	0.01382	-3.32065	-0.04825	12.7786	47.34654	16.06387	0.01475
Ag3K1Se2	icsd_402643	K	Ag		0	0	1	123	monoclinic	12	C2/m (12)	5.623114	25.623838	144.085753	12	0.2805	9.75	25.582864	21.624166	23.603515	9.993711	6.579129	8.28642	2.778079	22.254934	-0.514496	0	0.857493	0	-1	0	8.783777	39.115265	19.798187	7.132498	0.36026	16.02028	26.717716	0.599613	46.67723	15.49124	15.92928	0.00162	0.27152	-0.02233	15.49124	52.26714	19.01085	-0.00633
Ag3Rb1S2	icsd_001034	Rb	Ag		0	0	1	123	monoclinic	12	C2/m (12)	5.354259	24.459372	130.961823	12	0.5649	9.166667	27.633227	26.299868	26.966547	11.552838	9.078294	10.315566	1.413589	27.446923	-0.511101	0.638877	0.574989	-0.995037	0	0.099504	14.701612	46.036582	25.237926	6.860146	0.271819	27.428476	29.362136	0.934144	55.41621	17.02254	17.01957	-0.01202	0.04465	0.00717	17.02254	49.4327	18.88832	-0.0099
Ag3Rb1Se2	icsd_090795	Rb	Ag		0	0	1	123	monoclinic	12	C2/m (12)	5.906241	26.568303	156.918812	12	0.339	11.25	24.633302	23.478874	24.056088	10.783173	8.70677	9.744972	1.241576	25.756925	-0.479632	-0.548151	0.685189	0	-1	0	14.896655	40.270766	23.899542	6.008413	0.251403	22.298661	28.693442	0.777134	46.38631	13.896	15.57789	-0.0051	-1.67638	-0.02062	13.896	50.02979	16.91088	0.00131
Ag3Rb1Te2	icsd_090872	Rb	Ag		0	0	1	123	monoclinic	12	C2/m (12)	6.01526	30.56255	183.84168	12	0.5739	10.166667	19.987349	19.622405	19.804877	9.515873	6.946922	8.231397	1.867584	21.68932	-0.476731	-0.667424	0.572078	0	-1	0	10.870896	39.307033	19.283236	5.548785	0.287752	20.990546	22.058911	0.951568	37.10917	7.82035	13.06919	-0.01528	-3.80583	0.00866	7.82035	46.30848	13.11352	-0.00302
Ag5O6Pb2	icsd_024038	Ag	Pb		0	0	1	256	trigonal	157	P31m (157)	8.286604	16.181163	134.086897	13	0	3.692308	75.551461	73.695598	74.62353	21.056465	13.383074	17.219769	2.89201	47.969565	-0.333333	-0.666667	-0.666667	0	0	-1	25.43919	120.199613	39.157786	14.75428	0.37679	120.199613	67.475666	1.781377	103.13579	56.20596	51.90235	0.01263	1.14647	0.00886	56.20596	102.98305	51.82498	-0.01572
Ag5O6Pb2	icsd_040058	Ag	Pb		0	0	1	256	trigonal	162	P-31m (162)	8.28651	16.181347	134.086897	13	0	3.692308	75.604867	73.757515	74.681191	21.065608	13.401443	17.233525	2.884501	48.007797	-0.333333	0.666667	-0.666667	0	0	-1	25.46125	120.191544	39.203517	14.75182	0.376288	120.191544	67.500506	1.780602	103.12434	56.27794	51.89652	0.05611	1.12434	-0.01091	56.27794	103.16457	51.90927	0.03628
Ag5Rb1Se3	icsd_050738	Rb	Ag		0	0	1	135	tetragonal	125	P4/nbm (125)	6.565319	24.215927	158.985297	18	0	10.555556	27.906577	27.849824	27.8782	8.688232	7.17817	7.933201	1.053881	21.737666	0	-1	0	-0.707107	0.707107	0	13.323231	30.952588	21.66829	4.050376	0.186926	18.587956	21.608237	0.860225	33.74869	25.04333	23.91264	-0.00247	0.01756	0.00047	25.04333	33.6963	23.88713	-0.00848
Ag5S4Sb1	icsd_016987	Ag			0	1	0	145	orthorhombic	36	Ccm2_1 (36)	5.857534	22.377413	131.076455	20	1.0096	3.6	32.138214	27.563405	29.85081	10.478183	8.055222	9.266702	1.669943	25.193169	-0.650791	0	0.759257	-1	0	0	12.406143	40.0902	23.557943	7.220554	0.306502	31.406183	18.206225	1.725024	63.91651	29.41666	23.69178	-0.01394	0.02583	0.02204	29.41666	48.66248	19.91407	-0.01962
Al1B2Cr2	icsd_020083	Al	Cr		0	0	1	122	orthorhombic	65	Cmmm (65)	5.300027	9.561882	50.678228	5	0	9.6	224.14879	221.03654	222.592665	156.163956	150.943178	153.553567	0.187019	374.537024	0	0	-1	-0.8	0	-0.6	287.86012	466.453617	375.448563	34.376729	0.091562	287.86012	361.046403	0.797294	487.72577	103.08748	157.78204	-0.38808	-0.99401	0.47542	103.08748	411.00795	119.16971	-0.01066
Al1B2Fe2	icsd_023205	Al	Fe		0	1	0	122	orthorhombic	65	Cmmm (65)	5.952984	8.942528	53.234727	5	0	9.6	219.206451	217.599027	218.402739	127.233517	113.462163	120.34784	0.614257	305.018159	-1	0	0	-0.406138	0	-0.913812	201.72646	396.211757	306.310631	45.642195	0.149006	206.607365	320.926611	0.643784	342.15856	201.47351	138.51622	-1.05988	0.38237	0.13498	201.47351	325.71415	93.99163	0.69898
Al1B2Mn2	icsd_025518	Mn	Al		0	0	1	122	orthorhombic	65	Cmmm (65)	5.829924	9.027958	52.632314	5	0	9.6	238.510633	238.396185	238.453409	175.102316	170.452187	172.777251	0.136886	417.496087	0	-0.995037	0.099504	0	0	-1	349.404674	466.160538	416.178222	22.212289	0.053372	466.160538	407.039209	1.145247	470.74072	171.50806	74.19185	-1.39925	0.37437	-0.94138	171.50806	431.32802	124.70149	0.95631
Al1B4Cr3	icsd_020082	Cr			0	1	0	134	orthorhombic	47	Pmmm (47)	5.32787	8.813016	46.954607	8	0	9.75	242.556772	240.941239	241.749006	182.567871	180.27389	181.420881	0.07033	435.357708	0	-0.707107	0.707107	-1	0	0	387.106348	518.691485	430.935642	28.140459	0.065301	438.864738	459.30957	0.955488	563.46021	103.15585	123.77575	0.00391	0.00264	-0.44583	103.15585	474.42709	108.64865	0.00407
Al1Ba1Ge1	icsd_417662	Ba			0	0	1	111	hexagonal	187	P-6m2 (187)	4.536223	28.912617	131.154079	3	0	10	44.763596	42.902403	43.832999	35.855167	34.970853	35.41301	0.169818	83.698748	0	0	-1	-0.164399	-0.986394	0	62.724373	96.972477	83.703945	9.450126	0.112899	62.724373	96.768317	0.648191	104.98934	22.65975	19.61862	0.02581	0.0409	0.02511	22.65975	105.47061	19.56435	0.02574
Al1Ba1Si1	icsd_162866	Ba			0	0	1	111	hexagonal	187	P-6m2 (187)	3.804074	27.994354	106.492588	3	0	9.333333	50.162281	47.557598	48.85994	39.664331	38.646512	39.155421	0.186452	92.702837	0	0	-1	-0.83205	-0.5547	0	70.60698	109.424992	92.455752	11.200433	0.121144	70.60698	109.248186	0.646299	119.23901	28.0675	20.25705	-0.00013	-0.00014	0.00028	28.0675	118.76478	20.3037	-0.00112
Al1Ca1Si1	icsd_155192	Ca			0	0	1	111	hexagonal	187	P-6m2 (187)	2.370839	22.213235	52.664009	15	0	9.933333	61.408466	50.694188	56.051327	34.093857	31.688553	32.891205	0.590874	82.530508	0	0	-1	0	-0.913812	-0.406138	61.85295	84.038131	79.674496	4.686246	0.058817	61.85295	81.33886	0.760435	125.42024	72.01529	22.63909	-0.00245	-0.00212	-0.00732	72.01529	125.54299	22.67624	0.00081
Al1Ca1Si1	icsd_155193	Ca			0	0	1	111	hexagonal	194	P6_3/mmc (194)	2.371526	22.206798	52.664009	18	0	9.722222	61.783816	51.315476	56.549646	43.132837	41.266985	42.199911	0.43007	101.381294	0	0	-1	-0.21693	0.976187	0	66.015397	124.787284	100.763059	16.547029	0.164217	66.015397	124.428475	0.530549	146.47552	54.47462	20.74649	0.00198	0.0013	0.01104	54.47462	147.52912	20.66774	0.00013
Al1Ca1Si1	icsd_162864	Ca			0	0	1	111	hexagonal	187	P-6m2 (187)	2.363274	22.284344	52.664009	3	0	10	62.045019	51.320826	56.682923	42.617995	40.274288	41.446141	0.499932	99.972127	0	0	-1	0	-1	0	61.923685	127.967995	99.697764	18.576498	0.186328	61.923685	126.874544	0.48807	147.5567	50.3147	23.66227	0.00039	-0.00011	0.00532	50.3147	148.7754	23.31716	-0.00027
Al1Co2Si2	icsd_043353	Si			0	0	1	122	trigonal	164	P-3m1 (164)	5.502905	12.131764	66.759945	5	0	8.8	182.026281	178.548567	180.287424	98.269545	89.391482	93.830513	0.516061	239.876925	-0.650945	-0.390567	-0.650945	0	0	-1	167.31159	354.876166	227.325347	32.248772	0.141862	354.876166	268.899903	1.319733	309.71172	93.10177	105.71116	-6.48947	-3.78359	-1.76705	93.10177	311.05765	104.89869	3.48925
Al1F4K1	icsd_060525	K			0	0	1	114	monoclinic	11	P2_1/m (11)	2.733738	14.383141	39.319746	24	6.8975	5.291667	54.226448	46.967784	50.597116	34.023393	22.141176	28.082285	2.83783	71.094041	-0.664364	0	0.747409	0	-1	0	28.745567	130.915664	64.233917	25.958987	0.404132	54.462519	110.797904	0.491548	136.94908	24.44118	22.76148	0.00981	0.19641	0.00456	24.44118	143.44353	25.79869	0.01755
Al1F4K1	icsd_077913	K	F		0	0	1	114	tetragonal	123	P4/mmm (123)	2.776697	14.160616	39.319746	6	6.7872	6.333333	61.177019	57.875229	59.526124	30.507309	0.121179	15.314244	1253.82433	42.314032	-0.241747	-0.644658	-0.725241	0	-1	0	0.10996	158.393775	6.741361	25.515589	3.784931	90.463752	116.782271	0.774636	164.6258	18.50867	22.12776	-0.00654	0.00581	0.00685	18.50867	164.62957	22.12613	-0.0091
Al1F4Rb1	icsd_054119	Rb	F		0	0	1	114	tetragonal	123	P4/mmm (123)	3.541001	14.728264	52.152805	6	6.8767	6.333333	59.46798	55.1887	57.32834	33.7761	24.439054	29.107577	1.987811	74.683016	-0.485071	-0.485071	-0.727607	-1	0	0	46.113597	143.296009	65.4673	21.767829	0.332499	75.532379	113.87485	0.663293	152.63931	23.33043	25.14845	-0.00198	-0.01426	0.00621	23.33043	152.62019	25.13829	-0.00314
Al1F4Rb1	icsd_054120	Rb	F		0	0	1	114	tetragonal	127	P4/mbm (127)	3.586966	14.539531	52.152805	12	6.9369	6.166667	42.400316	42.339128	42.369722	33.063125	25.884008	29.473567	1.388231	71.777272	-0.707107	0	-0.707107	-0.707107	0.707107	0	50.130163	113.381417	66.067045	16.431185	0.248705	76.434569	98.056552	0.779495	88.71165	21.43935	19.47545	-0.05859	-0.0199	-0.00152	21.43935	88.77921	19.4806	-0.0621
Al1F4Rb1	icsd_054122	Rb	F		0	0	1	114	orthorhombic	59	Pmmn (59)	3.591857	14.519734	52.152805	24	6.945	8.083333	39.350042	38.15992	38.754981	29.937015	24.300136	27.118576	1.191033	65.968663	-0.472866	-0.394055	0.78811	-1	0	0	46.826789	105.303824	60.736565	14.282425	0.235154	55.174625	89.611731	0.615708	111.07575	-1.63511	18.00415	0.01155	0.00174	-0.02209	-1.63511	110.50877	19.15984	0.01366
Al1F4Rb1	icsd_077914	Rb	F		0	0	1	114	tetragonal	123	P4/mmm (123)	3.541298	14.727033	52.152805	6	6.8686	6.333333	59.485851	55.204934	57.345392	33.784405	24.448156	29.11628	1.986943	74.70533	-0.485071	-0.485071	-0.727607	-1	0	0	46.133059	143.330273	65.489351	21.770056	0.332421	75.546807	113.898056	0.663284	152.67927	23.33995	25.15972	-0.0026	-0.01087	0.00609	23.33995	152.6589	25.1492	-0.0039
Al1F4Tl1	icsd_200637	Tl	F		0	0	1	114	tetragonal	123	P4/mmm (123)	5.757945	14.773229	85.063438	6	4.2513	6.333333	62.209797	56.936711	59.573254	31.124762	19.395353	25.260057	3.116381	66.395854	-0.485071	-0.485071	-0.727607	-1	0	0	35.765594	142.82166	55.29006	23.413514	0.423467	71.374562	110.80327	0.644156	155.08655	27.54907	28.59651	0.00361	-0.01167	0.00144	27.54907	155.03752	28.57448	0.00185
Al1F4Tl1	icsd_202453	Tl	F		0	0	1	114	tetragonal	123	P4/mmm (123)	5.758171	14.772648	85.063438	6	4.2496	6.333333	62.215721	56.941	59.57836	31.128029	19.4031	25.265564	3.114041	66.409241	-0.485071	-0.485071	0.727607	-1	0	0	35.746285	142.825968	55.3071	23.412047	0.42331	71.373509	110.810703	0.644103	155.09551	27.55584	28.6022	0.00266	0.06144	0.00119	27.55584	155.04584	28.57923	0.00231
Al1F4Tl1	icsd_202458	Tl	F		0	0	1	114	monoclinic	15	C2/c (15)	5.8559	14.526109	85.063438	12	4.4179	5.583333	41.445278	41.301271	41.373274	27.061659	18.998916	23.030287	2.125382	58.277534	-0.743294	0	-0.668965	-0.705346	-0.705346	0.070535	32.542902	98.288127	51.537663	16.631511	0.322706	66.818532	85.912179	0.777754	81.01104	21.65889	22.73205	-0.0533	-2.12359	0.12216	21.65889	82.97043	21.84942	-0.09903
Al1Ge1Mn1	icsd_657172	Mn	Al	Ge	0	0	1	111	tetragonal	129	P4/nmm (129)	5.693496	15.026045	85.550728	6	0	10	124.634244	122.919718	123.776981	72.530013	69.411811	70.970912	0.238564	178.749165	-0.707107	-0.707107	0	-0.124035	0.992278	0	140.712936	213.80982	172.582941	15.078987	0.087372	203.547178	179.537041	1.133734	237.32141	43.08952	78.24252	0.03942	-0.0665	-9.65477	43.08952	237.57063	78.07668	0.03181
Al1Ge1Na1	icsd_010147	Na	Al		0	0	1	111	tetragonal	129	P4/nmm (129)	3.120705	21.747312	67.866944	6	0	7	38.680711	36.767566	37.724138	26.122985	22.629357	24.376171	0.823957	60.168778	-0.743294	-0.668965	0	0	-1	0	44.008763	107.05785	55.613421	9.857007	0.177242	55.790258	61.303696	0.910064	87.09147	13.73475	17.27969	0.0008	0.00791	-0.01278	13.73475	111.33263	13.6779	-0.01086
Al1Ge1Sr1	icsd_418391	Sr			0	0	1	111	hexagonal	187	P-6m2 (187)	4.008574	25.854732	103.640612	3	0	10	49.712391	44.757925	47.235158	38.028695	36.312075	37.170385	0.347065	88.339148	0	0	-1	-1	0	0	65.149896	111.63078	87.44298	14.39372	0.164607	65.149896	111.566917	0.583954	122.91568	33.47477	16.49438	-0.00599	-0.00526	-0.01001	33.47477	122.89059	16.51641	-0.00839
Al1Ge1Y1	icsd_076295	Y	Ge		0	1	0	111	orthorhombic	63	Cmcm (63)	4.891507	21.333375	104.352347	6	0	9.333333	74.762003	74.49305	74.627527	50.908506	47.023163	48.965834	0.416741	120.535031	-0.778499	-0.07785	-0.622799	0	0	-1	93.399924	162.12407	117.281418	14.549723	0.124058	104.196559	113.107458	0.921217	140.1443	53.90568	25.37298	-1.21817	-1.17818	3.53854	53.90568	129.10265	35.99052	-0.64382
Al1La1Si2	icsd_094502	La	Al	Si	0	0	1	112	trigonal	164	P-3m1 (164)	4.148324	22.221984	92.183984	8	0	9.5	71.998602	71.823687	71.911145	38.936689	24.439683	31.688186	2.96831	82.889295	0	-0.913812	0.406138	-0.696526	0.398015	-0.597022	38.493351	144.623451	74.471702	27.134127	0.364355	105.927732	55.7712	1.899327	118.52302	62.56909	41.53319	-21.37989	0.0618	-0.65539	62.56909	111.9909	41.86421	22.1958
Al1Li1O2	icsd_028288	Li	Al		0	0	1	112	trigonal	166	R-3m (166)	3.292744	8.311073	27.366235	4	6.142	6	149.138671	138.995654	144.067162	116.682589	90.937778	103.810183	1.488492	251.115328	-0.616316	-0.35218	-0.704361	-0.86164	0.492366	-0.123091	154.200127	384.916245	230.779276	66.814863	0.289518	251.710009	362.17402	0.694997	398.06368	86.77295	29.34119	-24.90202	0.00297	-0.0177	86.77295	397.97473	29.35878	24.85739
Al1Li1O2	icsd_099517	Al			0	0	1	112	tetragonal	141	I4_1/amd (141)	3.390096	8.072408	27.366235	8	5.6948	5	157.624644	149.658272	153.641458	133.036487	116.804556	124.920521	0.748063	294.850635	0	0	-1	-0.631169	-0.631169	0.450835	161.157001	374.140304	302.602016	48.365967	0.159834	161.157001	293.713892	0.548687	304.10817	118.43334	92.85744	0.00079	-0.01245	0.01443	118.43334	304.17396	92.88893	-0.02536
Al1Mo4S8	icsd_036564	Mo			1	1	1	148	trigonal	160	R3m (160)	4.637233	18.38209	85.242039	13	0	4.307692	89.06413	89.02977	89.04695	42.308684	41.125637	41.717161	0.144219	108.247389	-0.778499	-0.544949	-0.3114	-0.212	-0.953998	0.212	91.418945	129.710896	106.674587	8.017892	0.075162	95.910493	105.982381	0.904966	146.34875	56.83611	66.05135	-1.27281	-1.4823	-1.98769	56.83611	154.74031	54.62073	-3.22196
Al1N1Ti2	icsd_603608	Ti	Al		0	0	1	112	hexagonal	194	P6_3/mmc (194)	4.160705	13.641473	56.758145	8	0	7.25	153.264241	153.237778	153.251009	115.103373	113.475815	114.289594	0.071887	274.604976	0	0	-1	-0.212	-0.741999	0.635999	232.688794	294.426293	277.35953	13.254487	0.047788	232.688794	260.370126	0.893685	297.10266	72.02366	87.74155	-0.0121	0.00846	-4.61542	72.02366	297.59203	93.86876	-0.00863
Al1N1Zr2	icsd_157764	Zr	Al		0	0	1	112	hexagonal	194	P6_3/mmc (194)	5.416162	17.125806	92.756135	8	0	7.5	138.767694	138.767494	138.767594	100.820287	99.670492	100.245389	0.057681	242.372948	0	0	-1	-0.217643	-0.725476	-0.652929	214.035908	257.682218	244.518345	10.750512	0.043966	214.035908	228.284734	0.937583	263.7915	71.05164	81.61652	0.00066	0.01154	-2.06278	71.05164	264.31337	80.98567	0.00317
Al1N3Nb4	icsd_181352	Nb			0	0	1	134	hexagonal	194	P6_3/mmc (194)	7.074119	12.928792	91.459811	16	0	6.6875	230.621414	230.233397	230.427405	134.860913	130.798918	132.829915	0.156962	334.2614	-0.21693	0.976187	0	-0.431934	0.259161	0.863868	284.728524	363.799322	334.178166	20.631903	0.061739	359.691026	304.711909	1.18043	394.06037	186.44944	125.55237	-0.00073	0.00069	-8.41101	186.44944	391.84841	125.7459	0.00673
Al1N3Ta4	icsd_181350	Ta			0	0	1	134	hexagonal	194	P6_3/mmc (194)	13.14289	12.520684	164.557973	16	0	6.5	250.179516	248.556701	249.368108	94.461645	67.76053	81.111088	1.976785	219.531214	-0.099504	-0.995037	0	0	-0.6	-0.8	129.264321	279.094194	204.098011	47.160233	0.231067	203.543833	134.880271	1.50907	338.91623	247.51636	186.42249	-0.03059	0.00872	0.00347	247.51636	325.18343	194.8467	0.02261
Al1N3Ti4	icsd_091772	Ti			0	0	1	134	hexagonal	194	P6_3/mmc (194)	4.58361	11.795287	54.064992	16	0	6.75	192.38547	192.043691	192.214581	133.67917	133.067878	133.373524	0.024749	324.959736	-0.485643	0.874157	0	-0.303046	-0.808122	0.505076	302.357337	335.722359	325.409253	7.037645	0.021627	313.742329	317.791563	0.987258	371.38525	117.12038	98.41416	0.00114	-0.00155	-3.95244	117.12038	372.49528	100.98314	-0.01604
Al1N3V4	icsd_181351	V			0	0	1	134	hexagonal	194	P6_3/mmc (194)	5.475616	10.339962	56.617655	16	0	6.6875	229.710653	229.362142	229.536398	159.890712	159.196714	159.543713	0.023316	388.597151	-0.514496	-0.857493	0	0	0	-1	351.775902	423.356366	386.869069	13.442215	0.034746	423.356366	377.458586	1.121597	444.14748	122.57336	112.02542	-0.00688	0.0097	0.31703	122.57336	431.85376	124.31485	-0.00304
Al1Na1O2	icsd_022216	Na			0	0	1	112	trigonal	166	R-3m (166)	3.485214	9.763714	34.028636	4	4.7547	5.75	136.297351	132.823707	134.560529	97.697697	89.981239	93.839468	0.454934	228.420073	-0.581914	-0.363696	-0.727393	-0.919145	0.393919	0	183.494984	288.327444	218.830984	34.439119	0.157378	250.299775	288.274259	0.86827	316.74601	89.55349	39.06904	-0.84261	0.00522	-0.03483	89.55349	316.71696	39.07651	0.802
Al1Na1Se2	icsd_300173	Na	Al		0	0	1	112	monoclinic	15	C2/c (15)	3.288609	26.242977	86.302895	32	2.3531	4.90625	23.508997	23.021149	23.265073	13.65606	10.569253	12.112657	1.481468	30.964257	-0.909137	0.101015	-0.404061	-0.664364	0.747409	0	15.944916	53.706018	30.051879	7.414834	0.246734	35.372278	33.924637	1.042672	38.49581	24.06846	13.06721	1.29517	-3.786	0.75683	24.06846	36.74034	10.92832	0.3001
Al1Na1Si1	icsd_010146	Na	Al		0	0	1	111	tetragonal	129	P4/nmm (129)	2.057847	20.995462	43.205452	6	0	7.333333	41.762591	39.878861	40.820726	27.635265	25.118109	26.376687	0.5483	65.106916	-0.743294	-0.668965	0	0	-1	0	53.643665	106.922924	61.465836	9.03131	0.146932	58.002798	69.199819	0.838193	93.0117	16.79415	19.90633	0.00552	0.00735	-0.0149	16.79415	112.74019	16.46829	-0.00544
Al1O3Sc1	icsd_086931	Al			0	0	1	113	orthorhombic	62	Pbnm (62)	4.094175	9.728836	39.83156	20	4.9591	4.7	207.015907	203.954766	205.485336	120.58019	116.412676	118.496433	0.194006	298.173735	0	0	-1	0	-0.83205	-0.5547	221.7902	363.410535	298.552477	26.361377	0.088297	221.7902	290.796196	0.7627	374.88215	122.45296	127.49019	0.00478	0.01178	-0.00315	122.45296	403.35465	145.18425	0.00229
Al1O3Y1	icsd_027100	Y			0	0	1	113	hexagonal	194	P6_3/mmc (194)	4.390699	12.396129	54.427675	10	3.3465	4.3	168.002391	164.628738	166.315565	85.375697	73.290264	79.33298	0.844984	205.348363	-0.789352	-0.613941	0	-0.597614	-0.358569	-0.717137	148.418927	253.857701	206.406841	37.032247	0.179414	156.528194	148.441327	1.054479	230.00133	110.81164	139.79237	0.00071	0.00858	0.00415	110.81164	230.05209	139.78439	0.0014
Al1S2Tl1	icsd_609264	Al	Tl	S	0	0	1	112	monoclinic	15	C2/c (15)	4.734861	25.90787	122.67016	32	2.1729	4.9375	22.94492	21.998444	22.471682	12.278906	10.268967	11.273937	1.021672	28.976088	-0.070535	-0.705346	-0.705346	-0.707107	0.707107	0	20.396967	49.272216	27.731758	6.868199	0.247665	28.136336	39.175215	0.718218	40.32567	21.15435	12.09068	0.01611	-1.32098	-0.04186	21.15435	41.7226	12.4571	0.01405
Al1Sc2Si2	icsd_052653	Sc			0	0	1	122	tetragonal	127	P4/mbm (127)	3.173218	18.112846	57.476017	10	0	10	97.512572	97.103262	97.307917	60.634103	56.304531	58.469317	0.388693	146.138014	0	0	-1	-0.569803	0.455842	0.683763	112.42486	173.410655	147.159899	16.88077	0.11471	112.42486	122.190698	0.920077	163.85365	61.51435	68.24416	0.04374	-0.04616	-3.93736	61.51435	163.84322	68.24423	-0.04911
Al1Se2Tl1	icsd_609323	Al	Tl	Se	0	0	1	112	monoclinic	15	C2/c (15)	5.43802	29.717735	161.605643	32	1.9234	4.8125	18.981339	18.263851	18.622595	10.152717	8.532258	9.342488	0.988892	24.012049	-0.707107	0	-0.707107	-0.707107	-0.707107	0	16.677613	40.235403	23.150413	5.385769	0.232642	23.010696	30.952205	0.743427	32.17197	17.71486	10.84608	-0.01351	-1.50625	0.001	17.71486	32.83073	10.47925	-0.02855
Al1Si1Sr1	icsd_158842	Sr			0	0	1	111	hexagonal	187	P-6m2 (187)	3.159829	24.994749	78.97912	3	0	10	55.904582	49.384974	52.644778	42.248979	39.898674	41.073827	0.42655	97.789469	0	0	-1	-1	0	0	71.397687	126.853845	96.471754	17.533746	0.18175	71.397687	126.815877	0.563003	140.05283	39.34427	17.37477	-0.00038	-0.00025	-0.00198	39.34427	140.05052	17.41444	-0.00161
Al1Si1Y1	icsd_099138	Y			0	1	0	111	orthorhombic	63	Cmcm (63)	3.902373	20.421128	79.690855	6	0	9.333333	84.43526	84.400839	84.41805	62.513124	60.202422	61.357773	0.192319	148.174079	-0.741249	-0.074125	0.667124	-0.752577	-0.658505	0	123.392906	178.297273	145.834004	12.626285	0.08658	140.818663	139.542948	1.009142	171.15336	54.74789	32.28543	-0.0011	0.03694	1.65641	54.74789	161.47315	34.03031	-0.00268
Al1Si2Y2	icsd_092450	Y			1	0	0	122	orthorhombic	71	Immm (71)	4.053481	21.38119	86.668248	5	0	10	83.967857	83.253576	83.610716	66.003374	64.777123	65.390249	0.103231	155.605454	0	0	-1	-0.780869	0	0.624695	133.529743	183.307957	155.630073	10.204117	0.065566	159.262704	146.294462	1.088645	183.51892	34.53938	57.08383	0.01772	-0.12638	-0.02614	34.53938	170.10552	32.3482	0.02053
Al2As4Ca3	icsd_060161	Ca			1	0	0	234	monoclinic	15	C2/c (15)	3.554071	24.600958	87.433544	18	1.0977	5.277778	50.71506	48.445511	49.580286	30.879288	28.821876	29.850582	0.403766	74.583662	-0.287348	0	-0.957826	0	-1	0	51.005128	102.863169	73.695735	11.458986	0.15549	80.07989	69.98839	1.144188	95.65148	26.20775	31.30642	0.00887	-1.66411	0.00875	26.20775	116.74644	28.61244	-0.0032
Al2As4Sr3	icsd_423787	Sr			1	0	0	234	monoclinic	15	C2/c (15)	4.134201	27.514058	113.748655	18	1.1492	5.277778	45.118514	43.993478	44.555996	27.181895	24.409573	25.795734	0.593449	64.86862	-0.371391	0	0.928477	0	-1	0	38.488238	92.982595	63.443446	10.473646	0.165086	64.633432	64.081547	1.008612	82.81564	21.64417	30.31533	0.00332	-4.26551	-0.00279	21.64417	103.80035	24.04893	-0.0067
Al2Ba1Ge2	icsd_098515	Ba	Al		0	0	1	122	tetragonal	139	I4/mmm (139)	4.671899	23.925501	111.777533	5	0	11	45.830951	39.804211	42.817581	29.845657	24.993434	27.419545	1.122109	67.788492	0	0	-1	0	-0.980581	-0.196116	30.14235	89.105731	67.668065	14.797863	0.218683	30.14235	81.337764	0.370582	108.50335	16.09361	29.7192	-1.74646	0.69972	0.10021	16.09361	108.54381	29.73823	0.72385
Al2Ba1Si2	icsd_153385	Ba	Al		0	0	1	122	tetragonal	139	I4/mmm (139)	3.58342	22.934442	82.183743	5	0	11.6	50.270298	42.582157	46.426227	37.321579	31.029823	34.175701	1.194372	82.326197	0	0	-1	-1	0	0	35.582872	111.364799	82.217793	18.874695	0.229569	35.582872	100.3111	0.354725	130.37156	11.87707	29.93878	-0.10238	-0.05391	0.13692	11.87707	130.36734	29.9373	-0.05849
Al2Ca1Ge2	icsd_412119	Ca	Al		0	0	1	122	trigonal	164	P-3m1 (164)	3.624785	21.926924	79.480386	5	0	5.6	58.270042	56.847831	57.558937	28.246147	24.869605	26.557876	0.703867	69.053177	-0.811107	0.486664	0.324443	0	0	-1	53.109208	87.747434	66.017753	8.692117	0.131663	87.747434	58.220033	1.507169	100.43645	62.01191	26.55134	-4.19726	-0.1168	0.23958	62.01191	99.71401	25.51582	3.87305
Al2Ca1Si2	icsd_020278	Ca	Al		0	0	1	122	trigonal	164	P-3m1 (164)	2.354929	21.183906	49.886596	5	0	5.6	63.429179	61.213826	62.321502	38.279657	35.460755	36.870206	0.433658	92.390762	-0.78072	0.39036	0.48795	-0.842152	-0.421076	0.336861	69.506408	120.363611	90.071322	10.860372	0.120575	92.430003	92.861278	0.995356	124.63412	55.91457	28.09423	-8.40985	-1.32995	5.28156	55.91457	123.97796	26.71971	8.1152
Al2Ca3N4	icsd_280347	Ca			1	0	0	234	monoclinic	14	P2_1/c (14)	3.068673	13.842235	42.477297	36	2.2589	5.138889	105.751663	104.012191	104.881927	70.881534	67.365225	69.12338	0.277712	170.019235	-0.986394	0	0.164399	-0.624695	0	-0.780869	133.126171	211.498282	170.696195	19.382891	0.113552	136.448928	163.493075	0.834585	174.86017	60.56515	75.67169	-0.0329	7.91923	0.02697	60.56515	173.29308	54.27685	-0.01238
Al2Ca3N4	icsd_280349	Ca			1	0	0	234	monoclinic	15	C2/c (15)	3.142463	13.517197	42.477297	18	2.5403	5.333333	111.160021	110.14591	110.652966	72.509245	65.528734	69.018989	0.541837	171.416941	-0.948683	0	-0.316228	-0.455842	0.683763	-0.569803	122.198754	236.921494	170.787473	26.124084	0.152963	140.697397	160.42533	0.877027	196.61208	76.16116	72.88102	0.00564	-19.48272	-0.02038	76.16116	199.7825	62.35686	-0.00576
Al2Ca3P4	icsd_423780	Ca			1	0	0	234	monoclinic	15	C2/c (15)	2.454337	22.409017	54.999282	18	1.2484	5.222222	59.089752	56.831833	57.960793	36.766811	34.400235	35.583523	0.383707	88.61606	-0.287348	0	0.957826	0	-1	0	60.892839	120.114055	87.703282	13.229421	0.150843	92.194949	84.051775	1.096883	110.80058	30.15638	37.07716	0.00473	0.23182	-0.008	30.15638	135.18829	32.57026	-0.0082
Al2Ge1La2	icsd_423614	La	Al		0	1	0	122	orthorhombic	63	Ccmm (63)	5.00826	26.817505	134.309032	10	0	9.2	58.972892	58.0009	58.486896	40.386079	39.304808	39.845443	0.154308	97.414443	0	0	-1	-0.136083	0.952579	-0.272166	73.682921	110.926511	98.163887	7.7418	0.078866	109.176291	91.379408	1.194758	103.58498	29.95972	34.44193	0.03888	-0.04707	3.32473	29.95972	128.38178	38.83947	-0.04122
Al2Ge2La1	icsd_412120	La	Al		0	0	1	122	trigonal	164	P-3m1 (164)	4.819243	23.302778	112.301755	5	0	9.2	65.421012	65.128424	65.274718	42.517547	38.811922	40.664735	0.481875	101.017058	-0.722897	0.40161	0.562254	-0.786334	0.436852	-0.436852	76.60658	127.06515	98.181542	12.864233	0.131025	100.118131	102.54564	0.976328	123.18816	25.38293	41.93462	-13.02476	0.23647	-0.0512	25.38293	123.10338	42.01096	12.7273
Al2Ge2Y1	icsd_039053	Y	Al		0	0	1	122	trigonal	164	P-3m1 (164)	4.428287	21.610274	95.696494	5	0	9.2	70.560982	70.527799	70.54439	51.978683	49.32092	50.649802	0.269906	122.60626	-0.755263	0.419591	0.503509	-0.755263	0.419591	-0.503509	103.508957	151.59127	121.917109	12.863607	0.105511	107.404008	120.743122	0.889525	140.79806	32.35144	40.59126	-13.01078	0.01138	-0.01772	32.35144	140.9299	40.5202	12.86434
Al2Ge4Sr3	icsd_417968	Sr			1	0	0	234	monoclinic	12	C2/m (12)	4.472016	25.059122	112.064795	9	0	8.222222	46.53322	45.375999	45.954609	33.116718	30.200934	31.658826	0.508234	77.239357	-0.989949	0	0.141421	-0.57735	0.80829	0.11547	47.686061	98.597441	76.55135	10.056987	0.131376	48.625322	76.08371	0.639103	66.3141	39.16204	20.29302	-0.02427	1.83255	-0.02737	39.16204	102.06129	14.63421	0.01208
Al2I1La2	icsd_411690	Al	I		0	0	1	122	hexagonal	194	P6_3/mmc (194)	4.968471	30.659467	152.330683	10	0	8.2	44.97229	42.62251	43.7974	29.699582	28.03173	28.865656	0.352624	70.999117	0	0	-1	-0.362143	0.814822	0.452679	41.846197	79.465723	72.110146	8.959073	0.124241	41.846197	75.145106	0.556872	91.21498	26.88974	27.86736	0.00215	-0.01292	-0.0781	26.88974	91.8682	28.45393	0.00224
Al2I2La3	icsd_411691	I			0	0	1	223	monoclinic	12	C2/m (12)	5.021996	34.222055	171.863019	14	0	7.428571	32.986876	32.379804	32.68334	19.937515	17.322255	18.629885	0.773633	46.965943	-0.445435	0.089087	0.890871	-0.986394	0	0.164399	29.396498	77.837706	44.255868	7.565846	0.170957	38.344411	53.138123	0.721599	79.42567	9.58845	14.79809	-0.22048	-5.81301	-0.69051	9.58845	71.29989	23.52923	-0.00308
Al2Mg1S4	icsd_107308	Mg	S		0	0	1	124	trigonal	166	R-3m (166)	2.192144	22.349145	48.992555	7	1.9936	4	30.604557	5.331315	17.967936	17.87433	3.202043	10.538186	27.651351	26.444636	-0.20739	0.518476	-0.829561	-0.099504	0.995037	0	4.430836	85.451641	16.080742	20.495242	1.274521	5.486853	85.419386	0.064234	97.4804	33.83844	1.79837	-0.18531	-0.01422	0.01628	33.83844	97.50369	1.82284	0.20449
Al2N2Ti3	icsd_071097	Ti	Al		0	0	1	223	hexagonal	186	P6_3mc (186)	4.111987	13.013525	53.51145	14	0	6.571429	156.248684	155.904371	156.076528	93.271059	84.616653	88.943856	0.513598	224.236162	-0.20739	0.829561	-0.518476	0	-0.124035	0.992278	158.436717	289.832465	213.634394	31.071488	0.145442	278.599209	257.263299	1.082934	316.22425	84.88945	68.04605	0.24065	2.83959	-0.77817	84.88945	283.78699	89.81994	18.26392
Al2P4Sr3	icsd_409134	Sr			1	0	0	234	monoclinic	15	C2/c (15)	3.229786	25.176404	81.314393	18	1.3358	5.333333	51.982837	50.780778	51.381807	31.437378	27.739473	29.588426	0.690213	74.470552	-0.351123	0	0.936329	0	-1	0	42.405856	106.062786	72.8309	12.838206	0.176274	70.894726	73.854429	0.959925	94.37303	25.12552	35.31675	0.00278	-6.95019	-0.00498	25.12552	118.47654	28.1834	-0.00666
Al2Si2Sr1	icsd_419886	Sr	Al		0	0	1	122	trigonal	164	P-3m1 (164)	2.87959	22.807297	65.675663	5	0	5.6	59.191427	58.3522	58.771814	34.14045	31.470272	32.805361	0.43862	82.977279	-0.722897	-0.40161	-0.562254	-0.814822	-0.452679	0.362143	58.997701	104.832068	80.261021	10.607766	0.132166	93.233568	86.101993	1.082827	113.68115	47.20459	27.86343	-8.02734	-1.88965	0.45559	47.20459	113.35557	26.5372	7.65238
Al2Si2Y1	icsd_089550	Y	Al		0	0	1	122	trigonal	164	P-3m1 (164)	3.19132	20.713281	66.102704	5	0	9.2	77.682059	77.573778	77.627918	56.440755	53.59249	55.016623	0.267129	133.509492	-0.737865	0.421637	0.527046	0	-0.874157	-0.485643	112.649607	164.878652	132.676105	14.063483	0.105999	116.238314	133.149632	0.87299	155.70519	36.95347	44.27595	-13.95394	0.00182	-0.00294	36.95347	155.83321	44.27889	13.94834
Al3Fe1Si2	icsd_079710	Al			0	0	1	123	orthorhombic	60	Pbcn (60)	3.70635	14.408541	53.403098	24	0	9.333333	116.379324	116.362877	116.371101	79.491087	78.286809	78.888948	0.077056	193.044647	-0.461566	0.593442	0.65938	-1	0	0	177.727774	219.895693	189.176609	9.389569	0.049634	208.786007	202.771987	1.029659	240.82429	48.7841	60.82642	-0.02289	0.01015	0.01911	48.7841	238.28636	57.91572	-0.02162
Al3Si2Y2	icsd_075228	Al	Si		0	0	1	223	monoclinic	12	C2/m (12)	3.74902	19.927076	74.707003	7	0	10.571429	81.70883	81.447184	81.578007	60.560928	55.991968	58.276448	0.411214	141.205314	-0.486664	-0.811107	0.324443	-0.299813	0.674579	-0.674579	98.255041	181.222284	139.57936	18.517196	0.132664	131.512521	131.212382	1.002287	171.35397	41.97607	28.23622	-3.49491	-2.53986	8.46706	41.97607	151.66502	58.37755	2.67583
Al4Br4La5	icsd_413559	La	Br		0	0	1	445	tetragonal	140	I4/mcm (140)	5.079476	28.216717	143.326148	26	0	9.615385	43.094748	39.733713	41.41423	22.791505	17.161881	19.976693	1.724743	51.628803	-0.503509	-0.419591	0.755263	-1	0	0	29.42237	88.445973	46.640867	15.456374	0.331391	52.933197	81.302997	0.651061	99.56723	27.97065	18.53873	0.3527	-0.39482	-0.19089	27.97065	99.58819	18.60961	-0.40128
As1Au1Ba1	icsd_420341	Ba			0	0	1	111	hexagonal	194	P6_3/mmc (194)	7.955901	28.470174	226.505886	6	0	10	51.257067	48.091408	49.674237	24.369194	20.081279	22.225236	1.133466	58.022271	-0.21693	-0.976187	0	-0.529999	0.847998	0	34.379649	85.613548	56.451454	10.475565	0.185568	64.152317	55.959668	1.146403	87.3613	60.33794	23.60224	-0.00228	-0.00081	7.6229	60.33794	88.04016	23.22673	-0.00363
As1B2P1	icsd_181293	As	P		0	0	1	112	tetragonal	115	P-4m2 (115)	4.129123	12.820369	52.936881	4	0.9911	4	147.093813	147.091542	147.092677	143.56917	139.564371	141.56677	0.14349	321.545147	-0.707107	-0.707107	0	-0.83205	0	-0.5547	274.023261	356.275611	320.508617	21.387353	0.066729	274.200569	298.842213	0.917543	351.17352	21.35758	69.63437	0.00129	0.00219	-0.00399	21.35758	351.17911	69.637	-0.00218
As1Ba1Cu1	icsd_041705	Ba			0	0	1	111	hexagonal	194	P6_3/mmc (194)	5.892268	25.90783	152.655876	6	0	10	49.438604	49.02397	49.231287	33.794083	33.437472	33.615778	0.061783	82.149697	-0.19245	0.19245	-0.96225	-0.21693	0.976187	0	74.068814	90.579354	81.711266	5.383879	0.065889	74.138416	90.495103	0.819253	102.10609	26.87209	25.61844	-0.00445	-0.01487	-0.0451	26.87209	102.23037	25.65287	-0.0046
As1Ba1Li1	icsd_056445	Ba			0	0	1	111	hexagonal	187	P-6m2 (187)	4.383619	27.676736	121.324277	3	0.5918	10	34.19015	34.154608	34.172379	23.702298	21.968929	22.835614	0.395545	56.026893	-0.691714	-0.207514	-0.691714	0	0	-1	46.470709	72.667812	53.482619	6.840947	0.12791	72.667812	66.158195	1.098395	72.69201	20.13192	11.62219	-0.00057	-0.00016	0.00365	20.13192	72.68662	11.62302	-0.00033
As1Be1Li1	icsd_609869	Li	Be	As	0	0	1	111	tetragonal	129	P4/nmm (129)	3.453659	14.564369	50.300367	6	0.9995	10	55.426153	53.942775	54.684464	39.65035	28.324643	33.987497	2.026766	84.463832	-0.707107	-0.707107	0	-1	0	0	41.809494	146.457039	73.69484	20.666275	0.28043	89.164723	72.702363	1.226435	151.42262	7.14493	21.65531	0.00074	0.00182	-0.004	7.14493	151.41669	21.65763	0.00206
As1Be1Na1	icsd_100091	Na			0	0	1	111	hexagonal	194	P6_3/mmc (194)	3.090759	19.148552	59.183568	6	1.3458	10	51.273597	38.020105	44.646851	38.761094	26.927027	32.84406	2.546025	79.128731	-0.552345	-0.092057	0.828517	0	-1	0	44.959674	143.354166	72.701022	31.334692	0.431008	52.218894	143.306833	0.364385	151.84653	33.84113	9.22893	0.00715	0.00608	-0.01758	33.84113	151.87535	9.23193	0.00866
As1Ca1Cu1	icsd_659435	Ca			0	0	1	111	hexagonal	194	P6_3/mmc (194)	4.883882	20.235397	98.827298	6	0.1471	9.833333	64.989673	58.464806	61.72724	45.032314	42.231743	43.632029	0.443175	105.935777	0	0	-1	-0.099504	-0.995037	0	75.875407	137.843675	104.692503	19.311728	0.184461	75.875407	137.737245	0.550871	154.29792	42.50137	26.96926	0.02222	0.01915	-0.0022	42.50137	154.41995	26.98886	0.0211
As1Ca2I1	icsd_166534	As	I		0	0	1	112	trigonal	166	R-3m (166)	3.721144	31.458213	117.060541	4	1.5692	6	31.028064	30.364385	30.696225	19.109237	18.35906	18.734148	0.226164	46.70165	-0.505076	0.303046	-0.808122	-0.854358	0.512615	0.085436	38.966867	56.343129	45.897219	5.6138	0.122312	41.842135	55.875067	0.748852	64.4114	18.56401	16.27009	1.22736	-0.00116	-0.00307	18.56401	64.40684	16.27137	-1.23059
As1Cd1K1	icsd_609963	K	Cd		0	0	1	111	tetragonal	129	P4/nmm (129)	4.380904	28.608803	125.33243	6	0.1767	11	26.120051	25.134341	25.627196	15.830839	14.88318	15.35701	0.357583	38.40056	-0.276172	0.276172	-0.920575	0	-1	0	31.015377	52.669675	37.252125	5.231966	0.140447	31.255362	46.171115	0.676946	58.87807	11.92745	14.14058	0.00618	0.00816	-0.00819	11.92745	58.88085	14.14101	-0.00069
As1Cr1Mn1	icsd_107935	Mn	Cr	As	0	0	1	111	tetragonal	129	P4/nmm (129)	7.841472	12.836812	100.659506	6	0	10	193.257853	192.492443	192.875148	95.499288	71.204552	83.35192	1.709958	218.570352	0	-1	0	0	0	-1	104.645127	356.402331	217.396099	55.112845	0.253513	356.402331	195.915262	1.819166	259.17119	198.10497	101.92345	-0.07733	0.33366	-0.06977	198.10497	258.60032	108.21352	0.87643
As1Cu1Mg1	icsd_042324	Mg	Cu	As	0	0	1	111	tetragonal	129	P4/nmm (129)	5.357113	16.81815	90.096738	6	0	10	75.364532	74.957996	75.161264	32.438761	25.533515	28.986138	1.357616	77.053164	-0.707107	-0.707107	0	0	-0.707107	0.707107	38.011595	104.501464	72.80765	19.351257	0.265786	82.40637	53.965787	1.527011	115.87366	46.54942	56.81359	-0.1791	0.04596	0.02418	46.54942	116.18096	58.19973	-0.1637
As1Cu1Sr1	icsd_107943	Sr			0	0	1	111	hexagonal	194	P6_3/mmc (194)	5.470132	22.877404	125.142409	6	0.2686	9.666667	56.605111	53.805036	55.205073	41.191525	39.591098	40.391311	0.254161	97.415589	0	0	-1	-0.913812	-0.406138	0	75.230076	118.579584	96.625661	13.365072	0.138318	75.230076	118.526562	0.634711	130.84999	31.31427	25.49513	0.10006	-0.04072	0.05102	31.31427	130.83204	25.45521	0.0981
As1Fe1Li1	icsd_166457	Li	Fe	As	0	0	1	111	tetragonal	129	P4/nmm (129)	5.229734	14.574918	76.222937	6	0	10	68.908308	66.33041	67.619359	34.049233	32.984909	33.517071	0.200199	86.293444	-0.661693	0.147043	-0.735215	-0.6	0.8	0	72.638926	107.241985	84.8921	9.417083	0.11093	84.803407	101.716937	0.83372	122.21082	58.9381	34.96244	0.34745	-0.94033	0.7787	58.9381	133.69258	38.58243	-0.39044
As1Fe1Li1	icsd_168206	Li	Fe	As	0	0	1	111	orthorhombic	67	Cmme (67)	5.229692	14.575033	76.222937	6	0	9.833333	69.097079	66.748211	67.922645	34.161321	33.19373	33.677526	0.180939	86.702856	-0.40161	-0.562254	-0.722897	-0.164399	0.986394	0	74.191768	108.297136	84.643816	8.399425	0.099233	84.704662	99.990458	0.847127	131.38253	52.8093	38.20751	0.10751	0.7936	-2.52579	52.8093	133.82648	37.26691	0.17981
As1Fe1Li1	icsd_246335	Li	Fe	As	0	0	1	111	tetragonal	129	P4/nmm (129)	5.229636	14.575191	76.222937	6	0	7.333333	69.052676	66.541417	67.797047	34.111339	33.086472	33.598906	0.192617	86.506415	-0.667124	0.074125	-0.741249	-0.581238	0.813733	0	73.546936	106.861958	85.123922	9.257991	0.108759	85.035515	101.714346	0.836023	122.40446	58.78004	35.11263	0.16124	-0.60669	0.80788	58.78004	133.70905	38.9225	-0.29391
As1Fe1Mn1	icsd_610492	Mn	Fe	As	0	0	1	111	tetragonal	129	P4/nmm (129)	8.390408	12.250885	102.789922	6	0	10	190.7115	189.861833	190.286666	102.166136	101.353702	101.759919	0.044554	259.094323	-1	0	0	0	0	-1	237.261925	302.225222	258.867138	11.533671	0.044554	302.225222	252.921929	1.194935	304.29908	129.10056	116.03783	-2.04221	-0.06557	0.37682	129.10056	310.8017	121.94546	-1.36279
As1Fe1Na1	icsd_163143	Na	Fe		0	0	1	111	tetragonal	129	P4/nmm (129)	4.822337	17.648319	85.106138	6	0	9.833333	53.314399	44.856512	49.085455	36.333991	30.628206	33.481099	1.120014	81.836463	0	0	-1	-0.707107	-0.707107	0	41.064928	115.40616	81.467157	21.072266	0.25866	41.064928	112.734747	0.364261	127.2975	27.98028	28.93163	-0.26127	0.12928	-0.49022	27.98028	126.87816	29.81485	-0.00242
As1Fe1Rh1	icsd_043948	Fe			0	0	1	111	hexagonal	189	P-62m (189)	9.794903	13.204881	129.340528	9	0	4.666667	195.700158	195.638046	195.669102	63.358711	58.42954	60.894125	0.422122	165.51266	-0.447214	-0.894427	0	-0.635999	-0.212	-0.741999	114.576407	206.202449	164.6247	21.833054	0.132623	170.482869	137.039066	1.244046	260.86011	168.98706	155.80664	1.5234	0.72154	7.9763	168.98706	273.36828	149.58002	0.14129
As1Hg1K1	icsd_010458	K			0	0	1	111	hexagonal	194	P6_3/mmc (194)	5.510308	31.602707	174.140647	6	0	9.833333	29.784857	20.771315	25.278086	13.065926	10.258498	11.662212	1.802285	30.323344	-0.545455	0.545455	0.636364	-1	0	0	21.605497	54.983009	26.122846	5.988503	0.229244	25.326887	33.740369	0.75064	72.21398	34.52129	7.11529	0.00191	-0.00051	-0.00935	34.52129	71.06359	7.58232	0.00288
As1K1Li2	icsd_078938	K	Li		0	0	1	112	orthorhombic	59	Pmmn (59)	2.22423	23.87186	53.096516	8	0.6933	10.5	20.895416	19.699941	20.297678	15.551395	10.132872	12.842134	2.73442	31.816425	0	-1	0	-0.976187	0.21693	0	14.689356	66.077329	29.84635	10.070719	0.337419	15.931893	39.477247	0.403572	70.03733	9.59044	2.174	0.00116	-0.00282	-0.00862	9.59044	27.91147	18.83274	0.00544
As1K1Mg1	icsd_610753	K	Mg	As	0	0	1	111	tetragonal	129	P4/nmm (129)	2.788363	27.458631	76.56462	6	1.1405	10	27.180037	26.086358	26.633197	19.280668	17.3706	18.325634	0.591724	44.719999	0	0	-1	-1	0	0	31.795733	59.504155	43.539558	7.84316	0.180139	31.795733	57.012236	0.5577	65.4467	8.2365	14.86506	0.00458	-0.00427	0.00032	8.2365	65.44589	14.86543	0.0048
As1K1Mn1	icsd_060745	K	Mn		0	0	1	111	tetragonal	129	P4/nmm (129)	3.504186	26.688199	93.520407	6	0	11.166667	22.542956	13.738029	18.140493	9.851141	2.713473	6.282307	13.79319	16.896431	-0.707107	0	0.707107	-0.986394	-0.164399	0	3.435226	54.099848	10.689009	9.263129	0.866603	16.832821	36.278585	0.463988	63.81382	22.12068	7.36468	-0.77636	1.29927	4.70413	22.12068	54.40497	3.72545	0.97657
As1K1Zn1	icsd_010459	K			0	0	1	111	hexagonal	194	P6_3/mmc (194)	3.617827	27.447459	99.300164	6	0.2737	10	34.8726	27.570906	31.221753	24.420988	19.38689	21.903939	1.563159	53.257394	-0.5547	0	-0.83205	-0.83205	0.5547	0	34.093453	86.429648	50.207706	17.04209	0.339432	38.441584	86.390931	0.444972	94.84202	26.97209	7.70407	-0.00663	-0.02739	-0.03203	26.97209	94.85322	7.69543	-0.01025
As1K1Zn1	icsd_043985	K			0	0	1	111	hexagonal	187	P-6m2 (187)	3.596901	27.607141	99.300164	3	0.1971	9.666667	34.456433	27.667753	31.062093	23.868436	17.379837	20.624136	2.112068	50.66021	-0.172774	0.604708	-0.777482	-1	0	0	30.736207	86.568446	46.20193	17.721389	0.383564	42.024251	86.372672	0.486546	95.32893	28.25041	5.35722	0.01172	-0.00882	-0.01192	28.25041	94.87801	5.10853	0.00846
As1K2Na1	icsd_409224	K			0	0	1	112	hexagonal	194	P6_3/mmc (194)	2.183231	33.486387	73.108528	8	0.1543	10.5	15.912824	15.566904	15.739864	9.924827	9.844808	9.884817	0.062861	24.521244	-0.156174	-0.312348	-0.937043	-0.707107	0.707107	0	22.215195	27.095632	24.375469	1.601781	0.065713	22.306329	27.028805	0.82528	31.9766	11.03952	7.97168	-0.00236	-0.01097	-0.04534	11.03952	32.00345	7.9757	-0.0003
As1La1Pd1	icsd_056974	La			0	0	1	111	hexagonal	194	P6_3/mmc (194)	7.628884	23.235496	177.260893	6	0	10	88.65467	84.462943	86.558806	37.90102	37.311069	37.606045	0.128686	98.546711	0	-0.529999	0.847998	-0.668965	0.743294	0	88.642471	111.99419	97.464165	7.469201	0.076635	91.49339	110.464293	0.828262	156.11999	80.24734	52.60208	0.00625	0.02173	-0.01711	80.24734	156.80458	52.2709	0.00837
As1Li1Mn1	icsd_060742	Li	Mn		0	0	1	111	tetragonal	129	P4/nmm (129)	4.93881	15.331816	75.720925	6	0	6.666667	73.813853	72.632288	73.22307	33.506802	23.887919	28.69736	2.029604	76.144626	-0.099504	0	0.995037	-0.407307	0.678844	-0.61096	28.607469	108.643098	76.668833	20.072262	0.261805	28.92723	58.239116	0.496698	114.29106	41.0142	66.98435	-0.41472	-6.17202	-5.09253	41.0142	102.99108	68.97616	-0.67902
As1Li1O3	icsd_202862	Li	As		0	0	1	113	trigonal	148	R-3 (148)	4.284658	10.065628	43.127779	10	3.3321	4.6	105.243768	77.047639	91.145703	61.949345	26.258235	44.10379	7.162132	113.934421	-0.630488	0.315244	-0.709299	-0.816497	-0.571548	-0.08165	40.682297	254.093105	86.820658	57.835083	0.666144	110.448398	235.219038	0.469556	289.23626	102.14369	13.2516	11.22682	-2.91716	0.02103	102.14369	289.31496	13.25309	-11.17844
As1Mn1Na1	icsd_026461	Na	Mn		0	0	1	111	tetragonal	129	P4/nmm (129)	4.721855	17.917561	84.604127	6	0	9.666667	55.29133	46.386441	50.838886	37.44989	34.682883	36.066386	0.590873	87.506139	0	0	-1	-0.668965	0.743294	0	49.60365	116.37489	88.303202	17.831159	0.201931	49.60365	111.890003	0.443325	125.93063	41.94041	25.77156	-0.12207	-0.03159	0.20221	41.94041	126.84851	25.93512	-0.27477
As1Mn1V1	icsd_044009	Mn	V	As	0	0	1	111	tetragonal	129	P4/nmm (129)	7.485883	13.3686	100.075771	6	0	10	178.147784	171.246994	174.697389	90.706751	78.758634	84.732693	0.798825	218.820272	0	-1	0	0	0	-1	123.773982	345.648373	216.270157	38.236563	0.1768	345.648373	210.726243	1.640272	285.62803	151.07092	99.84105	1.49532	-0.55098	2.91249	151.07092	210.57162	102.79661	-0.79873
As1N1V3	icsd_610970	V	As		0	1	0	113	orthorhombic	63	Cmcm (63)	6.499773	12.352428	80.28798	10	0	5.5	197.33503	187.329519	192.332275	91.54715	86.137865	88.842507	0.367401	230.964929	0	-1	0	0	0	-1	163.388926	277.322853	233.199509	26.461863	0.113473	163.388926	230.701817	0.708226	255.88745	133.68928	150.48263	0.00736	0.00057	4.9378	133.68928	250.92914	152.37338	0.00054
As1Na1Zn1	icsd_610979	Na	Zn		0	0	1	111	tetragonal	129	P4/nmm (129)	4.313138	20.955482	90.383884	6	0.3723	10	38.819687	38.161077	38.490382	22.025282	18.396922	20.211102	1.003391	51.601424	-0.707107	-0.707107	0	-1	0	0	32.987654	81.49372	47.00417	9.302207	0.197902	55.664406	49.023868	1.135455	88.62367	15.28059	19.63164	-0.0038	-0.04255	-0.03307	15.28059	88.60684	19.62131	-0.00782
As1Ni1Rh1	icsd_601484	Ni	As		0	0	1	111	tetragonal	129	P4/nmm (129)	9.942446	13.1675	130.917154	6	0	7.333333	194.31562	190.911903	192.613761	64.805578	51.361428	58.083503	1.326608	158.334979	0	-1	0	0	0	-1	79.199846	234.893312	160.456073	37.259824	0.232212	234.893312	138.422353	1.696932	225.82537	179.45613	148.66379	1.19013	-0.32696	0.15949	179.45613	225.65428	148.59377	-1.44758
As1P1Ti2	icsd_044039	As	P		0	0	1	112	hexagonal	194	P6_3/mmc (194)	4.947686	16.917676	83.703344	8	0	6	125.176202	124.765175	124.970689	73.316429	61.094735	67.205582	1.003519	170.969314	-0.894427	0.447214	0	-0.70014	-0.140028	0.70014	118.705102	211.950127	170.008464	30.248159	0.177921	120.008608	123.574886	0.971141	183.3311	84.82055	100.37119	-0.011	-0.00444	2.03057	84.82055	186.0572	97.16135	-0.01005
As1Pb2Pd3	icsd_106267	Pd	Pb		0	1	0	123	orthorhombic	36	Cmc2_1 (36)	10.843053	20.638116	223.780184	12	0	5.666667	86.467612	86.418016	86.442814	30.676559	28.84882	29.76269	0.317353	80.095629	-0.6	-0.8	0	0	-0.707107	0.707107	66.342296	107.950598	79.728132	9.684633	0.121471	70.226314	73.899087	0.9503	125.25354	66.22874	64.95195	0.01143	-0.03404	-0.01752	66.22874	123.26684	73.74672	0.00042
As1Pd1Sr1	icsd_404723	Sr			0	0	1	111	hexagonal	194	P6_3/mmc (194)	6.162756	24.157004	148.873723	6	0	10	67.248253	60.773138	64.010696	32.161046	29.256138	30.708592	0.603007	79.424671	-0.696311	0.174078	0.696311	-0.6	0.8	0	63.525624	123.868733	77.436228	13.366334	0.172611	76.365661	96.538597	0.791038	124.96021	75.22943	29.23765	-0.00579	0.00233	4.21863	75.22943	125.95721	30.04803	-0.00842
As1Pd5Tl1	icsd_023540	Pd			0	0	1	115	tetragonal	123	P4/mmm (123)	11.380101	16.91385	192.481329	7	0	10.857143	131.054558	130.746709	130.900633	47.710191	44.078467	45.894329	0.414316	123.275959	-1	0	0	-0.707107	0.707107	0	88.024197	154.218203	126.076899	16.086827	0.127595	105.807924	121.349024	0.871931	177.66014	119.22246	102.3249	0.0059	-8.00E-05	-0.01926	119.22246	177.7262	102.33403	0.00336
As1Pt1Sr1	icsd_059187	Sr			0	0	1	111	hexagonal	194	P6_3/mmc (194)	8.242081	24.017041	197.950393	6	0	9.5	77.599261	67.602581	72.600921	26.574939	15.984629	21.279784	3.460528	58.157266	-0.995037	0.099504	0	-0.640184	0.768221	0	20.956626	83.656278	53.65894	15.680632	0.292228	81.194433	45.581126	1.781317	120.48119	113.18733	35.28791	8.00E-05	0.00059	-0.42422	113.18733	131.50117	28.47121	-0.00334
As1Pt1Y1	icsd_044047	Y			0	0	1	111	hexagonal	194	P6_3/mmc (194)	9.454733	21.011922	198.662127	12	0	9.916667	113.764441	102.714827	108.239634	38.765935	31.479913	35.122924	1.264825	95.084088	-0.970143	0.242536	0	0	0	-1	60.743976	119.177108	88.900363	12.738618	0.143291	119.177108	77.029517	1.547162	185.72424	146.13571	56.42747	-0.00634	-0.00259	5.13933	146.13571	185.34523	54.86999	0.00162
As1Si1Ta1	icsd_659470	Ta	Si	As	0	0	1	111	tetragonal	129	P4/nmm (129)	9.616168	16.344635	157.172752	6	0	8.666667	160.888408	160.267733	160.57807	118.600217	116.320232	117.460224	0.101877	283.303408	0	-0.83205	-0.5547	-0.707107	0.707107	0	259.83456	319.785655	281.257435	15.234631	0.054166	319.772196	297.185522	1.076002	303.02347	83.88866	80.27002	0.01097	0.00128	-0.01278	83.88866	303.03048	80.27262	-0.0094
As1Te1Ti1	icsd_281420	Te			0	0	1	111	orthorhombic	71	Immm (71)	6.618322	20.940857	138.593327	6	0	6.333333	81.68674	78.780677	80.233709	52.427836	42.531505	47.47967	1.2003	118.971253	-1	0	0	-0.613572	-0.383482	0.690268	66.5648	160.124905	121.015041	24.177254	0.199787	99.819023	96.036374	1.039388	128.05628	70.85454	69.31756	0.05994	-0.97286	0.13927	70.85454	107.0361	41.14061	0.13571
As1Ti1Zr1	icsd_092989	Zr	Ti		0	0	1	111	tetragonal	139	I4/mmm (139)	6.345727	18.667481	118.458741	6	0	7.333333	130.084627	129.98546	130.035044	70.410354	57.442944	63.926649	1.129484	164.777764	0	-0.993884	-0.110432	-0.707107	0.707107	0	94.959058	247.974488	162.999811	33.239218	0.203922	214.904974	166.915823	1.287505	189.17969	125.16077	72.69875	2.01483	-2.27064	-0.25269	125.16077	182.58905	76.23969	-2.92065
As2Ba1Cd2	icsd_030917	Ba	Cd		0	0	1	122	trigonal	164	P-3m1 (164)	5.957163	28.543216	170.036581	5	0.1572	5.6	44.428362	44.320303	44.374333	26.141543	25.359225	25.750384	0.156686	64.730195	0	-0.743294	0.668965	-0.858116	-0.476731	0.190693	54.802929	74.756932	63.6281	5.640283	0.088645	64.83804	72.052317	0.899874	85.06876	25.74004	25.42296	-3.15993	-0.01413	0.01143	25.74004	85.08283	25.43468	3.17782
As2Ba1Co2	icsd_609848	Ba	Co		0	0	1	122	tetragonal	139	I4/mmm (139)	6.901441	19.490972	134.515793	5	0	8	79.630756	77.599176	78.614966	50.571911	47.656464	49.114187	0.332062	121.947302	0	0	-1	-0.680414	0.680414	-0.272166	75.767677	141.205966	123.615835	14.918401	0.120684	75.767677	131.151652	0.57771	155.20876	44.35343	53.36078	-1.00537	-0.51627	-1.56799	44.35343	155.53732	53.11478	-1.60043
As2Ba1Cr2	icsd_609849	Ba	Cr		0	0	1	122	tetragonal	139	I4/mmm (139)	6.277983	20.692642	129.908067	5	0	8	77.214682	76.583501	76.899092	32.809037	23.16202	27.985529	2.090749	74.873766	0	-0.986394	0.164399	-0.721995	0.618853	-0.309426	31.198843	120.056503	73.69646	20.08249	0.272503	73.772904	68.911496	1.070546	104.07538	74.67238	57.44942	-4.9844	3.54789	0.56109	74.67238	93.81291	58.93463	7.46377
As2Ba1Cu2	icsd_609850	Ba	Cu		0	0	1	122	tetragonal	139	I4/mmm (139)	6.698659	20.538394	137.57969	5	0	12.4	65.079783	64.558844	64.819313	38.530244	35.551345	37.040794	0.427027	93.342323	-0.099504	0	-0.995037	-0.57735	-0.57735	-0.57735	65.678402	121.98389	93.813657	11.990443	0.127811	66.15058	85.388377	0.774702	113.96284	42.049	44.69985	9.04259	-3.12828	-1.61637	42.049	114.94165	45.21412	-3.02635
As2Ba1Cu4	icsd_089628	Ba	Cu		0	0	1	124	trigonal	166	R-3m (166)	6.980368	18.397304	128.419949	7	0	12.571429	69.202148	68.44319	68.822669	33.952841	17.950744	25.951792	4.468312	69.162114	-0.707107	-0.424264	0.565685	-0.811107	-0.486664	-0.324443	25.187811	140.574927	54.642391	23.468583	0.429494	111.784176	79.19792	1.411453	135.89516	51.83216	30.42716	17.58923	8.33113	2.22394	51.83216	129.61582	33.62595	-11.11435
As2Ba1Fe2	icsd_166020	Ba	Fe		0	0	1	122	orthorhombic	69	Fmmm (69)	6.711842	19.735947	132.464566	5	0	11	78.131849	70.328025	74.229937	46.442405	37.534168	41.988287	1.297647	105.981912	0	0	-1	-0.348155	-0.870388	-0.348155	42.849507	130.359723	106.990357	22.9815	0.2148	42.849507	118.163788	0.362628	159.97825	36.82348	58.81962	-0.14119	-0.16139	-0.7271	36.82348	163.67963	56.00594	0.72662
As2Ba1Fe2	icsd_180484	Ba	Fe		0	0	1	122	tetragonal	139	I4/mmm (139)	6.711739	19.736251	132.464566	5	0	10.8	78.173889	70.569718	74.371804	46.278423	37.159947	41.719185	1.334677	105.441585	0	0	-1	-0.870388	-0.348155	-0.348155	42.141085	129.887226	106.414978	22.950214	0.215667	42.141085	116.668112	0.361205	162.78957	36.52623	55.2071	-0.06604	-0.05174	1.0028	36.52623	159.61004	60.68747	0.41726
As2Ba1Mg2	icsd_030916	Ba	Mg		0	0	1	122	trigonal	164	P-3m1 (164)	4.048963	27.541673	111.515209	5	1.06	5.6	45.169071	45.166689	45.16788	33.554013	32.45818	33.006097	0.16886	79.623522	0	-0.928477	0.371391	0	-0.8	-0.6	68.741755	94.127501	79.584889	6.737378	0.084656	77.518123	74.55169	1.03979	86.61899	24.21343	24.19246	-6.20782	0.00669	-0.0018	24.21343	86.63494	24.18926	6.21371
As2Ba1Mn2	icsd_041794	Ba	Mn		0	0	1	122	tetragonal	139	I4/mmm (139)	6.490848	20.31509	131.862153	5	0	11.2	76.780939	75.928056	76.354497	43.151507	41.963677	42.557592	0.152764	107.669006	0	0	-1	0	-1	0	82.105974	123.681738	107.268734	8.959	0.083519	82.105974	116.768842	0.70315	148.85388	40.05031	52.59497	-0.78979	0.22664	0.47247	40.05031	148.16716	49.47269	0.14301
As2Ba1Ni2	icsd_164196	Ba			1	1	1	122	monoclinic	12	C2/m (12)	6.563715	20.469584	134.356518	5	0	11.2	69.54343	63.172446	66.357938	38.765706	31.447083	35.106395	1.264492	89.530587	-0.666667	0.333333	-0.666667	-0.390567	-0.130189	0.911322	55.677043	143.437396	83.652166	21.621195	0.258465	80.874869	108.165516	0.747695	108.87353	40.10629	40.80599	4.00159	-17.77821	-16.17585	40.10629	143.84525	34.76841	0.18044
As2Ba1Ni2	icsd_164197	Ba			0	0	1	122	tetragonal	139	I4/mmm (139)	6.57592	20.431591	134.356518	5	0	10.8	68.455306	63.949175	66.20224	38.511289	34.97787	36.74458	0.575558	93.023329	-0.099015	-0.099015	-0.990148	-1	0	0	65.973702	137.272735	89.155906	14.139552	0.158594	66.22505	104.932968	0.631118	157.14051	29.04029	39.91621	-0.51814	0.15036	1.63245	29.04029	156.89094	40.27805	0.40785
As2Ba1Pd1	icsd_405110	As			0	1	0	112	orthorhombic	63	Cmcm (63)	6.767918	24.142278	163.392948	8	0	11.375	64.560968	64.260812	64.41089	32.792459	29.584455	31.188457	0.546848	80.562318	0	-0.747409	-0.664364	0	0	-1	60.856282	121.390642	76.290293	11.516691	0.150959	88.849345	81.746143	1.086893	105.91205	45.3413	31.47861	-0.02695	-0.1227	-1.49866	45.3413	112.40141	36.34675	-0.02964
As2Ba1Pd2	icsd_036376	Ba			0	0	1	122	tetragonal	123	P4/mmm (123)	7.334912	22.639299	166.057266	5	0	12	60.232023	59.113541	59.672782	29.32911	27.047686	28.188398	0.440662	73.060948	0	0	-1	-1	0	0	55.573344	95.378515	70.579302	8.948214	0.126782	55.573344	71.022034	0.78248	118.06262	29.56965	41.87359	-0.00182	-0.00282	-0.001	29.56965	118.06203	41.87473	-0.00781
As2Ba1Pd2	icsd_061196	Ba	Pd		0	0	1	122	tetragonal	139	I4/mmm (139)	7.679656	21.623008	166.057266	5	0	12.4	73.849938	73.293784	73.571861	35.733763	33.549728	34.641745	0.33308	89.82675	-0.707107	0.707107	0	-0.137361	-0.824163	-0.549442	67.198331	111.636916	88.838766	10.740095	0.120894	68.164836	82.587342	0.825367	126.21699	42.86174	52.33656	0.57216	0.77636	0.67107	42.86174	133.56574	55.79607	1.85097
As2Ba1Pt1	icsd_405112	As			0	1	0	112	orthorhombic	63	Cmcm (63)	8.360601	23.945701	200.20045	8	0	11.5	72.271991	72.120204	72.196098	37.135865	33.965246	35.550555	0.468849	91.614213	0	-0.707107	0.707107	0	0	-1	63.942052	123.388471	87.479421	12.532331	0.14326	109.683346	99.983905	1.09701	121.1731	45.70327	46.467	0.01768	-0.18956	-0.19179	45.70327	129.52046	35.64007	0.16022
As2Ba1Rh2	icsd_165121	Ba	Rh		0	0	1	122	tetragonal	139	I4/mmm (139)	7.573723	21.617225	163.72288	5	0	11.2	80.560546	72.612769	76.586657	41.164359	35.714143	38.439251	0.872488	98.79001	0	0	-1	-0.705346	-0.705346	0.070535	54.54791	145.127168	98.975085	21.300649	0.215212	54.54791	123.974374	0.439993	147.66907	63.63873	53.86769	1.12006	-2.17418	-0.42095	63.63873	149.31962	55.10906	-0.97941
As2Ba1Ru2	icsd_609861	Ba	Ru		0	0	1	122	tetragonal	139	I4/mmm (139)	7.495019	21.681561	162.503713	5	0	11.6	82.434491	68.0555	75.244995	38.673403	30.658835	34.666119	1.51834	90.153486	0	0	-1	-0.707107	0.707107	0	46.888355	152.837804	89.056146	25.270802	0.283763	46.888355	118.83887	0.394554	142.06427	83.04504	54.06632	3.399	-2.0229	1.03043	83.04504	145.69641	53.69749	-3.07768
As2Ba1Zn2	icsd_417000	Ba	Zn		0	0	1	122	tetragonal	139	I4/mmm (139)	5.84342	23.752846	138.797861	5	0	11	48.615997	48.176241	48.396119	24.845406	19.78661	22.316008	1.287466	58.028778	-0.523205	-0.523205	-0.672692	-1	0	0	40.175556	101.335085	51.255629	11.756507	0.22937	69.709746	72.729225	0.958483	110.37444	15.54692	26.27521	0.00346	-0.02507	0.03657	15.54692	110.35621	26.2512	0.00024
As2Ca1Cd2	icsd_100065	Ca	Cd		0	0	1	122	trigonal	164	P-3m1 (164)	5.541298	24.856889	137.739434	5	0.2267	5.6	50.015561	49.165185	49.590373	29.069109	28.70796	28.888534	0.080197	72.573251	0	-0.5547	-0.83205	-0.743294	-0.668965	0	65.374592	81.466133	71.921865	5.41896	0.075345	67.44437	81.425511	0.828295	97.67219	34.13525	27.01094	0.37338	-0.01303	0.01627	34.13525	97.68383	26.9924	-0.3829
As2Ca1Co2	icsd_609899	Ca	Co		0	0	1	122	tetragonal	139	I4/mmm (139)	6.180803	16.538084	102.218646	5	0	11.6	91.018734	83.135952	87.077343	43.141829	39.049117	41.095473	0.618865	106.528057	0	0	-1	-0.8	0.6	0	58.856289	138.696755	106.825485	19.127918	0.179058	58.856289	125.743046	0.468068	171.06347	60.3265	63.93512	1.32382	0.00504	-8.57425	60.3265	177.55344	63.95944	0.47202
As2Ca1Cu4	icsd_032619	Ca	Cu		0	0	1	124	trigonal	166	R-3m (166)	6.495091	16.220027	105.350558	7	0	12.285714	78.861599	75.32364	77.092619	40.285795	24.744084	32.51494	3.18746	85.521504	-0.678844	-0.407307	0.61096	-0.842701	-0.481543	-0.240772	37.352078	150.20021	71.813334	26.634944	0.370891	112.861075	104.204817	1.08307	163.76367	64.80919	32.5651	18.34884	0.53797	0.01925	64.80919	163.81834	32.61543	-17.98157
As2Ca1Fe2	icsd_166017	Ca	Fe		0	0	1	122	orthorhombic	69	Fmmm (69)	6.139624	16.31491	100.167419	5	0	11.4	97.762813	90.153526	93.95817	67.89986	63.562144	65.731002	0.425622	159.904489	0	0	-1	0	-1	0	102.121438	198.066043	159.807777	26.839889	0.167951	102.121438	197.434472	0.517242	224.15069	52.01175	51.45255	0.04454	0.02685	0.0723	52.01175	224.44633	51.51612	0.64844
As2Ca1Fe2	icsd_182278	Ca	Fe		0	0	1	122	tetragonal	139	I4/mmm (139)	6.139291	16.315795	100.167419	5	0	11.6	97.730001	90.13643	93.933216	67.877245	63.539478	65.708361	0.42559	159.851796	0	0	-1	-0.743294	-0.668965	0	102.092607	197.962882	159.827623	26.887097	0.168226	102.092607	197.475157	0.51699	223.66985	52.61988	51.56396	-0.18912	0.22946	0.08434	52.61988	223.41245	51.41382	0.72419
As2Ca1Ga2	icsd_422526	Ca	Ga		0	0	1	122	trigonal	166	R-3m (166)	4.605766	23.749668	109.385402	5	0.1866	5.2	53.776051	53.572488	53.674269	38.715035	35.154836	36.934935	0.51016	90.130856	-0.707107	-0.424264	0.565685	-0.786334	0.436852	0.436852	67.68279	118.491667	87.979756	12.988794	0.147634	83.519984	92.659546	0.901364	110.92022	26.69085	28.5312	12.97871	-0.11697	-0.16762	26.69085	110.90489	28.24046	-12.84956
As2Ca1Mg2	icsd_100041	Ca	Mg		0	0	1	122	trigonal	164	P-3m1 (164)	3.346833	23.669558	79.218062	5	1.2609	5.6	50.764448	50.116576	50.440512	36.325297	36.122896	36.224097	0.040943	87.682435	0	0	-1	-0.755263	-0.419591	-0.503509	76.793701	90.070745	87.969138	2.679276	0.030457	76.793701	88.334393	0.869352	102.5455	33.00387	24.94625	0.08238	0.00566	-0.00631	33.00387	102.53119	24.96073	-0.07979
As2Ca1Mn2	icsd_041792	Ca	Mn		0	0	1	122	trigonal	164	P-3m1 (164)	5.392669	18.463031	99.565005	5	0	5.6	83.614891	81.639494	82.627192	41.390819	24.888586	33.139702	3.339418	87.695014	-0.814822	-0.452679	-0.362143	-0.07785	-0.778499	-0.622799	38.291643	147.506692	77.026378	29.672503	0.385225	131.617937	54.480294	2.415882	135.75062	80.75594	43.4386	-22.34392	-0.93794	2.55478	80.75594	135.49208	42.11695	18.38458
As2Ca1Ni2	icsd_609910	Ca	Ni		0	0	1	122	tetragonal	139	I4/mmm (139)	6.183263	16.505746	102.05937	5	0	11.6	92.517234	92.459269	92.488252	48.770579	43.378997	46.074788	0.622078	118.540037	-0.707107	0.707107	0	0	-0.995037	0.099504	76.598066	157.239779	112.310107	18.662895	0.166173	122.154176	106.264043	1.149534	180.96545	39.27241	59.47279	1.08575	-1.20974	1.24644	39.27241	181.70257	59.18354	-1.11305
As2Ca1O6	icsd_081064	Ca			0	0	1	126	trigonal	162	P-31m (162)	4.391758	12.011824	52.753029	9	3.2245	4	126.962581	108.128213	117.545397	70.286839	59.217657	64.752248	1.108804	164.120402	-0.331042	0.579324	-0.744845	-0.986394	0	-0.164399	107.306232	246.92677	155.79764	41.179153	0.264312	131.23363	227.81797	0.576046	287.51172	109.82194	50.91799	0.00053	16.27339	0.0055	109.82194	287.58079	50.90566	-0.00174
As2Ca1Pd2	icsd_036372	Ca	Pd		0	0	1	122	tetragonal	139	I4/mmm (139)	6.913276	19.348298	133.760118	5	0	11.6	90.698273	89.315295	90.006784	31.887668	29.335735	30.611702	0.450437	82.484043	-0.705346	0.705346	0.070535	0	-0.913812	0.406138	54.007142	99.930949	79.722071	12.282966	0.154072	87.168604	70.416268	1.237904	135.15586	51.41203	74.72745	-0.20169	-1.61284	0.56067	51.41203	135.84812	73.48009	-1.47586
As2Ca1Ru2	icsd_609914	Ca	Ru		0	0	1	122	tetragonal	139	I4/mmm (139)	7.124214	18.276622	130.206566	5	0	11.6	107.456752	99.026029	103.24139	63.319635	56.065995	59.692815	0.732021	150.141778	0	-0.447214	-0.894427	-0.707107	0.707107	0	110.012043	226.821825	146.753389	33.588373	0.228876	113.446992	207.499098	0.546735	224.23472	80.65668	55.89154	0.06139	0.11248	0.02697	80.65668	224.21808	55.82327	0.23193
As2Ca1Zn2	icsd_100064	Ca	Zn		0	0	1	122	trigonal	164	P-3m1 (164)	4.968857	21.433646	106.500714	5	0.3887	5.6	58.192481	57.570457	57.881469	35.442313	33.151453	34.296883	0.356319	85.920337	-0.597614	-0.358569	-0.717137	-0.816497	-0.571548	0.08165	68.804676	106.804896	82.974258	11.82845	0.142556	90.022143	106.040265	0.848943	120.42942	34.37352	28.44928	-2.17205	-0.22934	0.21	34.37352	120.46601	28.37062	1.94253
As2Ca2Cd1	icsd_422578	Ca			2	0	-1	122	monoclinic	8	Cm (8)	4.457144	25.513444	113.717083	25	0.678	6.76	46.289847	44.49537	45.392608	29.710864	28.913298	29.312081	0.178253	72.360705	-0.976187	0	0.21693	-0.21693	0.976187	0	55.011162	86.747979	72.500697	7.813024	0.107765	56.837739	73.360115	0.774777	67.64237	29.34593	22.94958	0.01762	1.04488	0.00688	29.34593	103.89003	28.47506	-0.00608
As2Ca4O1	icsd_068203	Ca	As		0	0	1	124	tetragonal	139	I4/mmm (139)	3.365177	22.991462	77.370337	7	1.2086	6.714286	57.374492	57.312649	57.343571	41.862993	41.270494	41.566744	0.072861	100.43317	-0.485071	-0.485071	-0.727607	0	-1	0	93.452725	116.048863	98.793284	5.046191	0.051078	98.431273	106.561891	0.923701	125.10414	21.29985	28.50615	-0.00206	0.00269	-0.00274	21.29985	125.10575	28.50792	0.0049
As2Cd1O6	icsd_280576	Cd			0	0	1	126	trigonal	162	P-31m (162)	5.659445	11.679374	66.098779	9	1.8818	4	139.913223	120.105741	130.009482	65.380042	53.870608	59.625325	1.233165	155.15653	-0.650791	0	-0.759257	-0.512615	0.854358	-0.085436	102.337332	236.573291	145.504597	42.411682	0.29148	136.721673	234.488421	0.583064	299.28365	126.82177	62.90511	-0.01662	-5.95796	-0.00268	126.82177	299.3589	62.91349	-0.0255
As2Cd2Sr1	icsd_023249	Sr	Cd		0	0	1	122	trigonal	164	P-3m1 (164)	5.774288	26.588298	153.528501	5	0.1349	5.6	46.965608	46.408186	46.686897	28.033907	27.482815	27.758361	0.112272	69.500843	-0.544949	-0.3114	-0.778499	0	-0.995037	-0.099504	61.007513	79.551103	68.676248	5.893639	0.085818	65.168941	78.8783	0.826196	92.74108	29.42723	25.5983	-1.50994	-0.01323	0.01469	29.42723	92.85078	25.58152	1.51212
As2Co2K1	icsd_610072	K	Co		0	0	1	122	tetragonal	139	I4/mmm (139)	5.229811	19.483168	101.89328	5	0	8	53.65822	45.136677	49.397449	35.984508	30.741579	33.363043	1.041537	81.696517	0	0	-1	-0.707107	0.707107	0	46.056378	127.041521	81.14595	21.701539	0.267438	46.056378	116.08164	0.396759	121.3358	38.73056	26.92102	0.0178	-0.09069	-0.0246	38.73056	122.81228	26.30191	0.03814
As2Co2La1	icsd_610073	La	Co		0	0	1	122	tetragonal	139	I4/mmm (139)	7.598033	17.773022	135.040015	5	0	11.4	107.720709	100.062049	103.891379	55.616025	47.722889	51.669457	0.903515	132.965328	0	0	-1	-0.615457	-0.615457	0.492366	67.026377	178.540938	133.104311	27.739971	0.208408	67.026377	144.356596	0.464311	208.70185	60.31628	79.01827	0.42447	-0.28237	9.67208	60.31628	208.14381	79.94886	-0.37928
As2Co2Sr1	icsd_610122	Sr	Co		0	0	1	122	tetragonal	139	I4/mmm (139)	6.545375	18.029174	118.007713	5	0	11.4	81.977048	76.520083	79.248565	45.338971	42.934261	44.136616	0.35136	111.677356	0	0	-1	-0.140028	-0.980196	-0.140028	69.787055	134.55648	111.844029	14.953551	0.1337	69.787055	123.446092	0.565324	165.17088	48.76068	53.46512	0.20196	1.08801	6.10728	48.76068	165.26898	53.20545	0.80337
As2Cr2Sr1	icsd_610273	Sr	Cr		0	0	1	122	tetragonal	139	I4/mmm (139)	5.853448	19.373196	113.399987	5	0	8	81.78553	81.555117	81.670323	35.782166	30.907642	33.344904	0.791388	88.051319	-1	0	0	-0.707107	0.707107	0	59.457539	133.070197	87.674958	15.725151	0.179357	85.631057	95.085616	0.900568	114.55361	76.52582	58.74724	-0.46003	-0.21548	-0.2089	76.52582	117.08853	56.72876	0.97533
As2Cs1Fe2	icsd_074877	Cs	As		0	0	1	122	tetragonal	139	I4/mmm (139)	5.875491	22.295353	130.996136	5	0	7.2	46.306712	43.49073	44.898721	29.027363	27.678779	28.353071	0.308362	70.268037	0	0	-1	-0.743294	0.668965	0	47.528851	85.861535	70.300863	10.030874	0.142685	47.528851	83.735293	0.567608	98.26671	27.91609	26.29324	-0.11862	-0.07605	-0.76676	27.91609	99.12417	26.22895	-0.10074
As2Cs1Rh2	icsd_610296	Cs	Rh		0	0	1	122	tetragonal	139	I4/mmm (139)	6.634181	24.457345	162.25445	5	0	8	53.385181	43.278058	48.33162	33.396499	28.015565	30.706032	1.193886	76.019251	0	-0.099504	0.995037	-0.707107	-0.707107	0	48.919951	136.708472	74.570973	22.101062	0.296376	48.931606	112.081296	0.436572	115.58692	53.82725	21.76116	0.04871	0.03812	0.64994	53.82725	115.94437	21.62993	0.02151
As2Cs1Ru2	icsd_610297	Cs	Ru		0	0	1	122	tetragonal	139	I4/mmm (139)	6.437728	25.014305	161.035282	5	0	8	47.117211	27.999329	37.55827	31.055157	21.259244	26.1572	2.986716	63.686845	0	0	-1	-0.768221	0.640184	0	22.313378	124.199185	62.927808	26.603932	0.422769	22.313378	107.216388	0.208115	119.58447	38.28591	18.33481	0.02647	-0.17296	-0.31138	38.28591	111.11524	25.51199	-0.31135
As2Cu1Y1	icsd_412550	Y	Cu	As	0	0	1	112	tetragonal	129	P4/nmm (129)	6.39019	19.638408	125.493164	8	0	10	85.323954	83.629886	84.47692	45.313045	37.190917	41.251981	1.112207	106.431624	0	-1	0	-0.707107	-0.707107	0	65.073918	170.565216	106.146406	22.583475	0.212758	107.380698	113.153776	0.94898	131.40747	91.93648	48.32274	-0.0039	-0.0406	0.03335	91.93648	131.27741	48.22806	-0.00527
As2Cu2Sr1	icsd_078756	Sr	Cu		0	0	1	122	tetragonal	139	I4/mmm (139)	6.277799	19.285677	121.07161	5	0	11.4	67.557109	67.161174	67.359141	41.601039	37.544523	39.572781	0.546123	99.276957	-0.62706	-0.696733	0.348367	-0.259161	0.863868	-0.431934	69.969521	129.237414	96.723525	15.448888	0.159722	79.265498	92.872879	0.853484	130.17928	25.72897	46.74937	0.18373	5.04518	-0.01169	25.72897	142.7862	42.35529	-0.01814
As2Cu3K3	icsd_032015	K			0	0	1	233	trigonal	166	R-3m (166)	3.710027	25.611505	95.019371	8	1.5481	12.625	23.39447	22.916318	23.155394	13.650164	7.227217	10.438691	4.464448	27.224972	-0.755263	0.419591	0.503509	-0.755263	0.419591	-0.503509	10.920672	51.004382	22.513935	9.419225	0.418373	33.804535	19.47472	1.735816	38.76507	10.59364	16.71662	-10.33791	0.03468	-0.05804	10.59364	38.69739	16.67864	10.09233
As2Cu4K1	icsd_059207	K	Cu		0	0	1	124	trigonal	166	R-3m (166)	5.700037	18.441661	105.118154	7	0	12.571429	55.38348	47.421578	51.402529	29.429912	20.754779	25.092346	2.257808	64.742301	-0.658145	0.365636	-0.658145	-0.880451	-0.440225	-0.17609	32.307436	111.259798	57.302374	19.089012	0.333128	64.108619	86.607896	0.740217	132.53672	53.10736	14.43333	9.18336	-0.29515	0.23149	53.10736	120.24549	21.188	-11.71633
As2Cu4Sr1	icsd_089626	Sr	Cu		0	0	1	124	trigonal	166	R-3m (166)	6.757472	17.259185	116.628463	7	0	12.571429	74.181268	72.187871	73.184569	36.981363	17.550691	27.266027	5.5632	72.761896	-0.690268	-0.383482	0.613572	-0.842701	-0.481543	-0.240772	25.036651	142.793082	54.923078	25.946948	0.472423	116.070691	85.546265	1.356818	151.86969	58.63134	30.29228	18.40876	2.01893	0.18777	58.63134	151.7742	30.56022	-17.72712
As2Fe2K1	icsd_031473	K	Fe		0	0	1	122	tetragonal	139	I4/mmm (139)	5.010413	19.926913	99.842053	5	0	8.8	48.617153	40.123086	44.37012	22.733984	19.676443	21.205213	0.988655	54.873922	0	0	-1	-0.948683	-0.316228	0	26.708558	78.999066	54.916967	11.545112	0.210229	26.708558	63.642089	0.419668	98.23554	38.86235	31.46153	0.34911	-0.10386	7.55253	38.86235	90.2439	32.92838	0.15633
As2Fe2Rb1	icsd_167329	Rb	As		0	0	1	122	tetragonal	139	I4/mmm (139)	5.47654	21.042797	115.241724	5	0	7.2	47.317599	43.40898	45.363289	28.459101	26.373109	27.416105	0.485519	68.457208	0	0	-1	-0.668965	-0.743294	0	42.319405	92.021766	68.615725	12.073751	0.175962	42.319405	84.651367	0.499926	98.88868	30.31227	28.24789	-0.07621	-0.09708	1.63638	30.31227	99.98696	27.6528	-0.11663
As2Fe2Sr1	icsd_163208	Sr	Fe		0	0	1	122	tetragonal	139	I4/mmm (139)	6.473962	17.911208	115.956486	5	0	11	85.288113	71.193077	78.240595	56.845752	46.89308	51.869416	1.259192	127.445106	-0.099504	0	-0.995037	-0.778499	-0.622799	-0.07785	55.417294	168.340308	128.248445	31.917467	0.248872	55.660742	164.329528	0.338714	198.49376	42.70495	50.41932	-0.38417	0.7727	-0.04833	42.70495	196.16681	53.96083	-0.62441
As2Fe2Sr1	icsd_163209	Sr	Fe		0	0	1	122	tetragonal	139	I4/mmm (139)	6.474301	17.910272	115.956486	5	0	11.2	85.359673	71.313954	78.336814	56.75041	46.685289	51.71785	1.274932	127.168142	0	-0.099504	0.995037	-0.9759	0.19518	-0.09759	54.987193	168.237315	127.607236	31.61472	0.24775	55.253791	162.910168	0.339167	201.67664	38.61489	51.84451	-1.28843	0.63199	-0.47492	38.61489	200.43256	53.22578	-2.36756
As2Ga2Sr1	icsd_422527	Ga			1	0	-1	122	monoclinic	10	P2/m (10)	4.968227	25.194997	125.174469	20	0.1572	5.2	49.678352	49.360216	49.519284	36.809573	32.750118	34.779845	0.626207	84.545937	-0.147043	0.735215	0.661693	-0.65561	-0.749269	-0.093659	62.630983	117.536055	81.869121	12.868108	0.157179	74.07027	84.10108	0.880729	85.69184	40.90776	19.9678	-0.02606	1.19802	0.04296	40.90776	103.18032	10.69887	-0.02267
As2Hg1O6	icsd_411231	Hg			0	0	1	126	trigonal	162	P-31m (162)	6.799524	12.113816	82.368185	9	0.6764	4.666667	133.441103	113.845379	123.643241	49.894808	28.80416	39.349484	3.833168	106.726539	-0.358569	-0.597614	0.717137	-1	0	0	51.237983	204.465835	89.315353	45.874885	0.513628	122.598552	204.365447	0.599899	274.11671	127.68704	63.6913	-0.03798	-2.95645	-0.01798	127.68704	274.04184	63.63942	-0.01271
As2Hg2O6	icsd_411230	Hg	O		0	0	1	226	trigonal	162	P-31m (162)	6.47173	16.601453	107.440114	10	1.1796	4.2	89.013921	86.834676	87.924299	37.841621	22.283667	30.062644	3.515984	80.960703	-0.365636	-0.658145	0.658145	-0.993884	0	0.110432	36.58626	142.98091	66.66116	29.279408	0.439227	124.844113	128.647038	0.970439	173.0989	69.6923	43.68336	0.01395	-9.01886	-0.00655	69.6923	173.13225	43.77076	0.01151
As2K1Rh2	icsd_031474	K	Rh		0	0	1	122	tetragonal	139	I4/mmm (139)	5.995384	21.866885	131.100367	5	0	11	57.98	40.955458	49.467729	35.126674	25.187467	30.157071	2.38873	75.191515	-0.287348	0	0.957826	-0.707107	0.707107	0	41.468921	158.616594	71.418355	29.563302	0.413945	41.670987	127.401291	0.327084	128.13538	62.93506	22.99274	-0.03034	-0.02027	-0.16965	62.93506	130.11138	22.34469	0.02368
As2La1Ni2	icsd_068145	La	Ni		0	0	1	122	tetragonal	139	I4/mmm (139)	7.618091	17.70532	134.88074	5	0	12.4	102.586348	100.925167	101.755758	54.746269	51.40584	53.076054	0.341367	135.644069	0	0	-1	-0.095346	0.953463	0.286039	104.171806	169.270184	132.616332	15.497033	0.116856	104.171806	133.674875	0.779292	202.46641	51.6286	68.54154	-2.03718	2.16982	-0.43184	51.6286	202.16037	68.55445	2.25575
As2La1Ni2	icsd_068147	Ni			0	0	1	122	tetragonal	129	P4/nmm (129)	7.726918	17.455956	134.88074	10	0	12.4	110.877338	110.874423	110.87588	61.072035	60.114547	60.593291	0.079665	153.768543	0	0	-1	0	-0.747409	0.664364	136.66637	166.960484	154.738378	8.712235	0.056303	136.66637	141.296184	0.967233	187.63208	68.6524	76.31908	-0.08043	-0.12246	0.06664	68.6524	187.37398	75.61126	-0.08476
As2La1Pd2	icsd_604343	La	Pd		0	0	1	122	tetragonal	139	I4/mmm (139)	8.229958	20.240867	166.581488	5	0	12.4	100.112953	99.632872	99.872913	39.304994	35.175314	37.240154	0.591832	99.369631	-0.707107	0.707107	0	0	-0.83205	0.5547	62.635842	126.518145	97.060803	15.254769	0.157167	74.64258	82.380766	0.906068	158.21293	51.45028	84.66831	0.82324	-0.7081	1.35545	51.45028	158.2074	84.52672	-0.72427
As2La1Rh2	icsd_610777	Rh			0	0	1	122	tetragonal	129	P4/nmm (129)	8.637463	19.015664	164.247102	10	0	12.4	129.235609	128.912212	129.07391	53.679377	52.511057	53.095217	0.113754	140.078337	0	-1	0	-0.548151	0.479632	0.685189	118.857071	157.526742	142.543798	9.686311	0.067953	122.838023	127.47226	0.963645	185.58113	94.56101	101.08438	0.2714	-1.91284	0.51338	94.56101	185.19686	102.17512	-0.16083
As2La1Ru2	icsd_602111	La	Ru		0	0	1	122	tetragonal	139	I4/mmm (139)	8.432596	19.333066	163.027935	5	0	11.6	113.921156	96.289662	105.105409	61.333625	52.374805	56.854215	1.038369	144.506827	0	0	-1	-0.707107	-0.707107	0	70.4494	215.948343	146.204445	34.450286	0.235631	70.4494	182.916364	0.385145	222.65635	91.52952	74.13854	-0.30199	2.92776	-0.40432	91.52952	218.73854	73.18496	5.80267
As2Mn1O6	icsd_080351	Mn			0	0	1	126	trigonal	162	P-31m (162)	5.56039	9.980375	55.494772	9	0	4	176.091508	157.227447	166.659477	94.108067	91.631326	92.869697	0.255126	234.964958	0	0	-1	-0.894427	-0.447214	0	170.856896	276.231128	234.266157	27.864478	0.118944	170.856896	271.620229	0.629029	353.73606	156.27772	90.33918	-1.81234	-1.6177	3.66119	156.27772	353.67724	90.58741	-1.06412
As2Mn2O7	icsd_069003	Mn			0	1	0	227	monoclinic	12	C2/m (12)	4.897873	11.456685	56.113393	11	0.7984	3.545455	129.438202	127.829048	128.633625	69.481591	64.893348	67.18747	0.36611	171.673165	-0.089087	-0.890871	0.445435	-0.911322	0.130189	0.390567	116.092958	225.413579	170.43936	24.074866	0.141252	138.338135	179.342607	0.771362	252.19525	83.20185	77.89088	-11.03792	-14.80595	-3.27901	83.20185	196.49096	89.15618	18.78698
As2Mn2Sr1	icsd_049020	Sr	Mn		0	0	1	122	trigonal	164	P-3m1 (164)	5.786053	19.936573	115.354072	5	0	5.6	79.726531	79.676513	79.701522	41.949235	27.29578	34.622507	2.684826	90.729786	-0.813733	-0.464991	-0.348743	-0.696733	0.348367	-0.62706	38.385826	148.937635	82.05767	28.783039	0.350766	132.601824	60.205787	2.202476	126.57403	70.72162	42.68815	-18.16672	1.81257	-7.44635	70.72162	129.5528	41.87599	20.09827
As2Mn2Zn1	icsd_039512	Mn	Zn		0	0	1	122	trigonal	164	P-3m1 (164)	6.999496	15.425111	107.967996	5	0	5.6	109.484658	96.704693	103.094675	62.969783	46.126938	54.54836	1.95786	139.110237	-0.07785	-0.622799	0.778499	-0.858116	-0.476731	0.190693	70.951261	290.208247	127.367833	42.729335	0.33548	110.13021	196.500703	0.560457	267.55509	85.70303	44.946	-21.98614	-20.85516	25.98161	85.70303	222.83279	46.71898	6.62062
As2Ni1Zr2	icsd_068141	As			0	0	1	122	hexagonal	194	P6_3/mmc (194)	7.140184	18.185668	129.849018	10	0	8.1	136.35247	132.139435	134.245953	71.229792	67.637171	69.433481	0.297464	177.669561	0	0	-1	-0.80829	-0.11547	0.57735	117.797247	197.074142	179.902398	16.761045	0.093167	117.797247	167.879906	0.701676	235.61163	104.77878	94.43233	0.00546	-0.02495	0.0706	104.77878	234.99823	94.05473	0.00693
As2Ni2Sr1	icsd_168135	Sr	Ni		0	0	1	122	tetragonal	139	I4/mmm (139)	6.582491	17.903318	117.848437	5	0	11.6	77.032366	71.705757	74.369061	45.204273	39.929685	42.566979	0.734769	107.240374	-0.530669	0.379049	-0.758098	0	-0.992278	0.124035	74.68757	159.439592	102.126748	19.039541	0.186431	80.715534	121.833295	0.662508	177.25444	37.25418	41.84434	4.38949	-5.3504	1.02975	37.25418	177.65779	41.60196	-5.42253
As2O6Pb1	icsd_081063	Pb			0	0	1	126	trigonal	162	P-31m (162)	6.28997	13.289056	83.587758	9	2.185	4.666667	120.065006	106.331187	113.198097	60.336621	50.293808	55.315214	1.127575	142.701536	-0.35218	0.616316	-0.704361	-0.980581	0	-0.196116	91.535127	215.300826	134.735611	34.795087	0.258247	121.033968	190.718428	0.634621	253.8134	101.5268	57.56104	-0.00559	16.97954	0.00722	101.5268	253.81487	57.55098	0.00096
As2O6Pd1	icsd_245119	Pd			0	0	1	126	trigonal	162	P-31m (162)	5.744313	11.314393	64.993414	9	0.7755	4	148.347142	110.669916	129.508529	71.685357	56.293532	63.989445	1.707551	164.822392	-0.259161	-0.431934	0.863868	-0.868243	0.496139	0	67.432488	273.533055	158.603838	49.456316	0.311823	116.558586	229.85842	0.507089	324.97839	128.65559	78.28378	3.86306	14.98823	-23.66264	128.65559	274.503	68.18446	11.83429
As2O6S1	icsd_032581	O			0	0	1	126	orthorhombic	18	P2_12_12 (18)	3.188667	16.080258	51.274596	18	4.3742	2.111111	15.727274	11.095645	13.41146	10.479107	5.589063	8.034085	4.792082	20.090534	-0.650791	0	0.759257	-0.780869	-0.624695	0	7.469954	52.077988	17.194228	9.266794	0.538948	12.494456	36.573864	0.341623	42.59944	19.29586	2.25487	0.00128	0.01985	0.02524	19.29586	29.29126	6.29339	-0.00962
As2O6Sr1	icsd_420296	Sr			0	0	1	126	trigonal	162	P-31m (162)	4.72108	13.031921	61.524733	9	3.1901	4.666667	118.194029	103.939749	111.066889	64.690281	53.095656	58.892969	1.229002	150.141507	-0.35218	-0.616316	-0.704361	-0.980581	0	-0.196116	94.396137	229.533444	141.065445	37.545379	0.266156	127.897941	200.566974	0.637682	261.46581	99.23074	50.1458	-0.00288	19.31955	0.00011	99.23074	261.45945	50.11736	0.00077
As2O6Sr1	icsd_420297	Sr			0	0	1	126	hexagonal	193	P6_3/mcm (193)	4.723874	13.024211	61.524733	18	3.1755	4.388889	117.436127	103.957213	110.69667	59.22003	51.756024	55.488027	0.850734	142.632072	-0.154303	0.617213	0.771517	0	-1	0	104.564785	202.034919	135.251945	32.048149	0.236951	133.420272	201.954296	0.660646	253.19952	107.62152	47.3881	-0.00654	0.01572	-0.00288	107.62152	253.17785	47.33695	-0.00982
As2Pd2Sr1	icsd_047170	Sr	Pd		0	0	1	122	tetragonal	139	I4/mmm (139)	7.36324	20.310243	149.549185	5	0	12.2	83.641521	83.202046	83.421784	36.352855	33.547387	34.950121	0.423417	92.002066	-0.707107	0.707107	0	-0.976187	0	0.21693	63.370346	112.306724	88.651313	12.135781	0.136893	90.360038	82.85281	1.090609	142.07908	38.98071	63.88182	0.6153	-1.70586	1.46271	38.98071	142.07814	63.73104	-1.31584
As2Pt2Sr1	icsd_418156	As	Pt		1	0	0	122	monoclinic	14	P2_1/c (14)	10.230125	20.375235	208.44119	20	0	11.25	95.864994	95.291049	95.578022	37.834409	36.537436	37.185922	0.183509	98.750967	-0.147043	-0.735215	-0.661693	-0.393919	0	0.919145	78.068301	119.061915	96.643601	9.490831	0.098204	105.090811	91.22861	1.15195	155.7915	70.04448	74.76406	-0.06825	2.0569	-0.30035	70.04448	144.98942	58.82002	-0.68791
As2Rh2Sr1	icsd_417001	Sr	Rh		0	0	1	122	orthorhombic	69	Fmmm (69)	7.342248	20.050371	147.2148	5	0	11.6	86.861917	76.64022	81.751068	40.147942	32.716579	36.432261	1.269091	95.1607	0	-0.447214	0.894427	-1	0	0	59.297983	161.977443	88.756305	23.413704	0.263798	64.068273	132.290555	0.4843	197.5038	43.64689	55.58315	0.05168	0.90605	-0.55078	43.64689	191.513	52.73314	0.38351
As2Ru2Sr1	icsd_611298	Sr	Ru		0	0	1	122	tetragonal	139	I4/mmm (139)	7.383382	19.773543	145.995632	5	0	11.6	88.775691	61.486902	75.131296	51.358773	34.882089	43.120431	2.805583	108.587299	-0.357771	0.268328	0.894427	-0.707107	0.707107	0	43.131989	201.719491	104.296338	43.196937	0.414175	48.497224	180.750069	0.268311	207.05078	65.89049	48.57938	-0.26807	0.60628	0.11425	65.89049	206.48869	45.27899	-0.72178
As2Sn2Sr1	icsd_082371	Sr	Sn		0	0	1	122	trigonal	166	R-3m (166)	5.47574	28.802024	157.712394	5	0.1627	4.8	40.692434	37.599855	39.146144	31.281659	24.925522	28.10359	1.357276	68.030694	0	0	-1	0	-0.894427	-0.447214	41.099528	106.907547	65.563915	15.679966	0.239155	41.099528	67.337617	0.61035	89.77303	23.86608	22.23493	-15.28115	-0.04916	-0.07072	23.86608	89.83552	22.29886	15.39575
As2Sr1Zn2	icsd_023248	Sr	Zn		0	0	1	122	trigonal	164	P-3m1 (164)	5.302644	23.062038	122.289781	5	0.2554	5.4	53.976082	53.886764	53.931423	31.870443	29.370638	30.620541	0.427219	77.242932	0	-0.707107	0.707107	0	-0.995037	-0.099504	59.884934	96.039135	74.038163	10.699426	0.144512	85.530999	94.179574	0.908169	107.22349	28.375	28.97142	-2.97809	-0.35058	0.19294	28.375	107.69849	29.10951	3.43843
As3Br1Hg2	icsd_075169	As			0	0	1	123	monoclinic	15	C2/c (15)	7.152225	27.312928	195.348218	12	0.9406	5	36.077152	30.95101	33.514081	16.327549	12.904216	14.615883	1.492061	38.2825	-0.919145	0	-0.393919	-0.709299	0.630488	0.315244	20.247643	71.418283	38.153269	11.715307	0.307059	28.693789	40.367388	0.710816	59.61591	38.68858	24.07846	-0.01611	-12.79789	0.00596	38.68858	56.0447	21.84952	-0.00242
As3Cd4Cs1	icsd_262029	Cs	As		0	0	1	134	tetragonal	123	P4/mmm (123)	5.733867	29.224968	167.572078	8	0.2287	10.125	25.917402	23.590673	24.754037	14.063717	11.179454	12.621586	1.388613	32.364148	-0.468293	0.468293	0.749269	-1	0	0	21.805804	58.706641	29.318193	8.183898	0.279141	29.25329	46.395289	0.630523	64.07558	12.2795	11.90901	-0.00197	0.02494	0.00587	12.2795	64.05899	11.891	0.00972
As3Cd4K1	icsd_262032	K			0	0	1	134	trigonal	166	R-3m (166)	5.388268	27.485785	148.100776	8	0	7.625	34.398277	31.477109	32.937693	18.682758	17.61202	18.147389	0.396782	45.995013	0	-0.573462	-0.819232	-0.86164	0.492366	0.123091	35.735684	59.139521	45.073004	7.385269	0.163851	37.657942	57.657354	0.653133	71.72474	27.91539	16.75746	2.10301	-0.00883	-0.03302	27.91539	71.71136	16.75441	-2.10234
As3Cd4Na1	icsd_262035	Na			0	0	1	134	trigonal	166	R-3m (166)	5.679194	25.489034	144.757171	8	0	7.625	36.808103	32.174231	34.491167	18.02875	16.599577	17.314163	0.574509	44.496856	-0.085436	-0.512615	0.854358	-0.857493	0.514496	0	33.559274	59.901215	43.308664	8.728761	0.201548	35.338017	59.817349	0.590765	76.59288	32.61626	17.94976	-0.45046	-0.03902	-0.04025	32.61626	76.49551	17.91162	0.49631
As3Cd4Rb1	icsd_262037	Rb			0	0	1	134	trigonal	166	R-3m (166)	5.558397	28.37609	157.72557	8	0	7.375	33.950141	31.974203	32.962172	18.489237	17.474982	17.982109	0.352	45.645822	0	-0.664364	-0.747409	-0.845154	0.507093	0.169031	35.83119	57.807457	44.631313	6.610734	0.148119	40.240731	55.315941	0.727471	69.09269	26.75095	16.88727	2.73144	-0.01051	-0.01286	26.75095	69.12988	16.92432	-2.72431
As3Co1Hf5	icsd_085884	Hf			1	0	0	135	orthorhombic	62	Pnma (62)	11.210424	19.357374	217.004373	36	0	6.611111	133.222522	132.806853	133.014687	77.795577	75.480801	76.638189	0.156465	192.872538	0	0	-1	0	-0.752577	0.658505	147.87246	215.31196	195.518332	14.479898	0.074059	188.747357	188.443394	1.001613	239.06339	85.27466	89.24108	-0.06197	-0.00734	0.00508	85.27466	223.52084	93.31341	-0.07316
As3In2K3	icsd_300199	K	In	As	0	0	1	233	orthorhombic	64	Ccme (64)	3.633991	32.654284	118.66536	32	0.6103	8.1875	21.790138	21.7114	21.750769	10.439937	9.789082	10.114509	0.336066	26.271313	-0.640184	0	-0.768221	-0.980581	0.196116	0	19.82268	31.567871	25.563529	3.327823	0.130179	24.489988	31.219576	0.784443	39.80652	12.90832	15.22835	-0.00027	0.00964	-0.04871	12.90832	38.28912	14.40053	0.00127
As3La1Si1	icsd_068204	La	Si	As	0	0	1	113	orthorhombic	61	Pbca (61)	5.198954	25.02525	130.10513	40	0	5.85	53.347189	52.337361	52.842275	33.306675	31.830254	32.568465	0.251216	81.053416	-0.741999	0.635999	-0.212	0	-1	0	69.647573	106.713849	78.045187	6.806355	0.08721	96.407346	80.276973	1.200934	95.11045	13.63648	34.59013	0.03713	0.03276	0.19909	13.63648	114.68977	29.72165	-0.0571
As3Na1Zn4	icsd_262036	Na			0	0	1	134	trigonal	166	R-3m (166)	5.016072	21.074015	105.708772	8	0	7.625	44.494828	39.979442	42.237135	16.775969	14.958792	15.86738	0.720337	42.30457	-0.758098	-0.379049	0.530669	-0.839254	0.466252	0.279751	28.971021	54.790609	40.304326	5.571777	0.138243	43.749713	42.953281	1.018542	78.63389	49.8579	22.72234	3.86433	0.35519	-2.37631	49.8579	78.21818	23.22751	-3.98248
As4Ga2Sr3	icsd_423785	Sr			1	0	0	234	monoclinic	15	C2/c (15)	4.666484	27.755505	129.520623	18	0.7051	6.333333	42.901507	41.869429	42.385468	25.19333	22.934736	24.064033	0.517046	60.704016	-0.351123	0	0.936329	0	-1	0	37.902369	86.900831	59.485601	9.194489	0.154567	60.349523	59.429833	1.015475	76.66286	20.61122	29.17848	0.02245	-2.58639	-0.01538	20.61122	98.036	24.03021	0.02199
As4Ga3K3	icsd_040206	K			0	1	0	334	orthorhombic	52	Pnna (52)	3.739412	27.80509	103.974686	40	0.8612	7.375	27.207379	24.200593	25.703986	18.718757	15.551423	17.13509	1.142587	42.05926	0	-0.789352	0.613941	-1	0	0	25.837959	68.113944	40.023803	11.301419	0.282367	33.009461	62.299105	0.529854	74.30078	11.65397	14.99186	0.04788	-0.00367	-0.01493	11.65397	35.52451	8.82883	0.03295
As5Cs3O9	icsd_413151	Cs			0	0	1	359	trigonal	157	P31m (157)	3.713578	24.12837	89.602571	17	3.129	5.941176	12.786821	12.734984	12.760902	6.771187	6.610284	6.690736	0.125776	17.086048	-0.424264	0.707107	-0.565685	0	0	-1	15.465881	22.913294	16.736022	1.18209	0.070631	22.913294	17.13926	1.336889	21.39636	8.5923	7.1979	0.02298	0.201	-0.0006	8.5923	21.40566	7.17172	0.00116
As7Cs2Na1	icsd_423080	Cs	As		1	0	0	127	monoclinic	14	P2_1/c (14)	3.814693	35.400917	135.043627	40	1.4487	10	10.609616	10.281863	10.445739	4.958333	4.534496	4.746415	0.499224	12.366225	-0.993884	0	0.110432	-0.650791	0	-0.759257	7.774756	17.260106	12.562725	1.822786	0.145095	7.936408	11.014342	0.720552	14.21801	7.59964	9.36053	-0.00112	1.14807	-0.01139	7.59964	13.85182	7.07246	0.00319
Au1Ba1P1	icsd_420340	Ba			0	0	1	111	hexagonal	194	P6_3/mmc (194)	7.635618	26.478561	202.18019	6	0	9.666667	54.203613	53.932469	54.068041	31.076546	30.100587	30.588566	0.167144	77.206116	0	0	-1	-0.485643	0.874157	0	61.897914	86.344349	76.752506	6.648439	0.086622	61.897914	85.912089	0.72048	103.00595	27.8467	35.90478	-0.0022	-0.00065	-0.07975	27.8467	103.58474	36.05035	-0.00284
Au1Ba1Sb1	icsd_280954	Ba			0	0	1	111	hexagonal	194	P6_3/mmc (194)	7.847073	32.168879	252.431546	6	0	10	44.085384	39.55633	41.820857	22.191045	20.784378	21.487711	0.452892	55.037053	-0.447214	0.536656	-0.715542	-1	0	0	46.875703	75.138262	52.252576	5.888717	0.112697	50.363676	60.119582	0.837725	92.43409	39.03861	16.69203	0.00112	0.00103	0.08425	39.03861	95.16791	20.93779	0.00082
Au1Ca1Ge1	icsd_085836	Ca			1	0	0	111	orthorhombic	62	Pnma (62)	7.906293	21.680756	171.414412	36	0	10.444444	62.464232	57.267385	59.865809	36.186523	34.11083	35.148677	0.395004	88.187098	-0.813733	-0.581238	0	0	-0.8	-0.6	69.27989	123.265741	86.965518	13.951045	0.16042	76.700502	109.766608	0.69876	84.57731	26.71182	26.87158	0.10442	-0.01302	-0.06807	26.71182	140.28313	58.57437	0.06528
Au1Ca1P1	icsd_052661	Ca			0	0	1	111	hexagonal	194	P6_3/mmc (194)	7.012862	21.154217	148.351611	6	0.056	10	74.819646	64.521449	69.670547	33.967943	29.765109	31.866526	0.865609	82.952411	-0.608229	-0.228086	0.760286	-0.21693	-0.976187	0	61.672088	113.499906	77.924867	16.791763	0.215487	82.785345	112.847696	0.733602	155.91962	79.75672	27.95608	0.00313	0.00612	-0.05614	79.75672	156.38209	28.10176	0.00327
Au1Ca2N1	icsd_085528	Au			0	1	0	112	orthorhombic	63	Ccmm (63)	6.018398	20.081401	120.85786	8	0.2383	6.875	59.117832	58.986681	59.052256	33.813769	32.36645	33.090109	0.225807	83.646477	-0.658505	0.752577	0	-1	0	0	66.471015	103.681185	81.442055	8.146333	0.100026	85.147714	88.437562	0.9628	114.47999	28.538	28.62038	-0.00653	-0.0052	-0.33454	28.538	104.21369	42.7796	-0.01197
Au1Cr3O8	icsd_155508	Au			0	0	1	138	monoclinic	12	C2/m (12)	3.601775	18.477842	66.55302	12	0	2.666667	44.51281	5.547022	25.029916	19.940458	3.272803	11.60663	32.488518	30.158317	0	-0.613941	-0.789352	-0.813733	0	-0.581238	3.520349	125.75176	13.028771	15.039374	1.15432	6.196608	28.071032	0.220747	88.1353	44.25237	23.34335	-0.13193	35.8315	-0.4678	44.25237	113.96334	18.01413	-0.17759
Au1Cu1Sn1	icsd_611768	Cu	Sn	Au	0	0	1	111	tetragonal	139	I4/mmm (139)	11.183863	18.768524	209.904594	6	0	10	85.993476	84.297917	85.145696	31.870233	29.605912	30.738072	0.402524	82.309489	-0.703526	-0.703526	0.100504	-0.301511	-0.301511	-0.904534	55.238254	104.58192	78.950888	11.105196	0.14066	100.937834	75.969686	1.328659	129.60538	48.71196	66.23011	-0.24166	-0.26188	-2.22947	48.71196	129.48407	66.12815	-0.27229
Au1Ge1La1	icsd_656867	La			0	0	1	111	hexagonal	186	P6_3mc (186)	9.090183	24.874824	226.116695	6	0	10	76.55314	71.22345	73.888295	41.39887	40.402248	40.900559	0.198168	103.588092	0	0	-1	-0.768221	-0.640184	0	75.945392	119.566882	103.641115	11.910689	0.114922	75.945392	119.487935	0.63559	151.27949	59.40956	43.44464	-0.0326	0.04071	-0.00179	59.40956	151.28599	43.4252	-0.03111
Au1Ge1Sc1	icsd_081733	Ge	Au		0	0	1	111	hexagonal	186	P6_3mc (186)	8.907398	19.547168	174.1144	6	0	10.666667	96.777144	92.95672	94.866932	43.466825	40.961048	42.213937	0.346972	110.283767	-0.707107	0.707107	0	-0.123091	-0.123091	0.984732	99.039484	116.722462	107.697342	5.494354	0.051017	116.692279	99.687134	1.170585	164.3445	99.61496	51.62631	-0.06937	0.00488	0.10529	99.61496	164.23474	51.53793	0.02629
Au1Ge1Y1	icsd_656878	Y	Au		0	0	1	111	hexagonal	186	P6_3mc (186)	8.987816	22.078918	198.441259	6	0	10.666667	88.170623	81.095743	84.633183	40.060512	38.225917	39.143215	0.327208	101.743968	0	0	-1	-0.479632	-0.685189	-0.548151	71.188734	109.394965	101.898765	7.848377	0.077021	71.188734	98.465682	0.72298	151.55507	83.32626	56.10436	-0.02845	-0.00089	-0.14677	83.32626	152.46723	56.30785	-0.00079
Au1K1S5	icsd_402875	K	S		0	1	0	115	orthorhombic	72	Icma (72)	3.386407	27.767346	94.031536	28	1.7983	5.357143	10.452047	9.023807	9.737927	4.95199	4.483724	4.717857	0.680458	12.185658	-1	0	0	0	0	-1	8.017801	18.027089	11.796056	2.170782	0.184026	16.292271	13.405545	1.215338	11.10704	4.73498	8.20437	-0.01338	-0.00394	-0.00442	4.73498	18.87664	6.7463	-0.01015
Au1La1Sb2	icsd_082589	La	Sb	Au	0	0	1	112	tetragonal	129	P4/nmm (129)	8.797571	27.340016	240.525738	8	0	10	63.190793	61.279405	62.235099	32.475822	29.959745	31.217784	0.451101	80.237378	0	0	-1	-0.707107	-0.707107	0	57.264952	109.49832	80.639503	12.36742	0.153367	57.264952	93.474111	0.612629	107.74467	50.94518	42.85176	0.00671	-0.00921	0.00805	50.94518	107.84346	42.62743	0.00577
Au1Li1S1	icsd_165259	Li			2	0	-1	111	orthorhombic	70	Fddd (70)	6.69054	19.52217	130.613867	12	2.0073	4	39.166044	38.762561	38.964303	12.834821	12.096443	12.465632	0.315614	33.793145	0	0	-1	0	-0.743294	0.668965	25.439309	42.396979	33.916623	3.795705	0.111913	37.266596	34.314406	1.086034	59.78665	27.29097	34.19827	0.0069	-0.00125	0.00708	27.29097	49.59308	33.33689	-0.008
Au1Li1S1	icsd_280534	Li			0	1	0	111	orthorhombic	70	Fddd (70)	6.690597	19.522006	130.613867	12	2.007	4	39.14377	38.746916	38.945343	12.826092	12.090111	12.458101	0.314615	33.773113	0	0	-1	-0.743294	0	0.668965	25.435333	42.383192	33.894628	3.78684	0.111724	36.665769	34.731802	1.055683	49.60213	27.29101	33.31772	0.00869	-0.00034	-0.00372	27.29101	59.75042	34.15572	-0.00768
Au1Li2Sn2	icsd_055349	Sn			0	0	1	122	tetragonal	141	I4_1/amd (141)	6.932085	21.476002	148.873469	10	0	7.2	47.77037	47.06321	47.41679	22.690964	17.551252	20.121108	1.479227	52.883088	0	-0.099504	0.995037	-0.890871	-0.089087	-0.445435	28.531644	75.319549	49.156495	10.473353	0.213061	28.849351	45.825866	0.629543	94.93392	13.649	38.49242	-4.38293	0.58054	1.17475	13.649	96.88318	38.48286	2.27717
Au1N1Sr2	icsd_095826	Au			0	1	0	112	orthorhombic	63	Ccmm (63)	6.632212	24.174517	160.330528	8	0.1761	6.75	45.887418	45.811049	45.849233	24.120763	23.01535	23.568057	0.241814	60.361544	-0.698535	-0.698535	-0.15523	-1	0	0	50.48522	76.334409	57.979643	5.502146	0.094898	71.934147	64.480233	1.1156	85.65216	23.67855	22.97303	-0.00313	0.00569	-0.49163	23.67855	86.1487	31.0483	-0.00782
Au1Na1Te1	icsd_071650	Na			0	0	1	111	hexagonal	194	P6_3/mmc (194)	6.935905	27.736383	192.376926	6	0.1049	10	39.339967	21.60881	30.474389	10.524482	3.218567	6.871525	12.17019	19.173463	-0.768221	-0.640184	0	-0.995037	0.099504	0	4.196577	55.868216	10.623708	6.359597	0.598623	23.341402	13.289925	1.756323	91.12761	56.59044	8.90667	-0.0072	-0.00363	-3.11236	56.59044	87.91394	9.73087	-0.01155
Au1Rb1Te1	icsd_075026	Rb			0	0	1	111	hexagonal	194	P6_3/mmc (194)	6.418762	35.358736	226.959324	6	0	10	29.685549	21.968111	25.82683	11.652143	9.022152	10.337148	1.808821	27.361039	-0.141421	-0.989949	0	-0.613941	0.789352	0	18.299427	45.0252	25.258258	5.591392	0.221369	26.689297	30.185049	0.884189	56.91328	45.50065	8.60712	-0.00037	-0.00022	2.11753	45.50065	56.91666	8.50071	-0.00078
Au1Sc1Si1	icsd_071998	Sc			0	0	1	111	hexagonal	187	P-6m2 (187)	8.112968	18.421483	149.452908	6	0	10.666667	110.722794	103.471326	107.09706	60.887475	59.50156	60.194517	0.186542	152.089326	0	0	-1	0	-0.894427	-0.447214	119.356666	159.062533	151.642529	8.325142	0.0549	119.356666	154.113356	0.774473	209.68613	98.86708	59.2948	-0.02588	-0.00014	0.02202	98.86708	210.53653	58.98153	0.04953
Au1Sc1Sn1	icsd_245753	Sn			0	0	1	111	hexagonal	186	P6_3mc (186)	8.928016	22.358242	199.61474	6	0	8.5	80.896867	76.124913	78.51089	37.381988	36.111518	36.746753	0.238595	95.362265	0	0	-1	-0.16169	-0.808452	-0.565916	91.818116	94.367853	93.665738	0.45571	0.004865	91.818116	93.269655	0.984437	143.2748	82.33742	42.04944	-0.11094	-0.00495	-0.0304	82.33742	144.2593	42.13659	0.0966
Au1Si1Y1	icsd_072000	Y			0	0	1	111	hexagonal	186	P6_3mc (186)	8.095946	21.465035	173.779767	6	0	10	99.203932	92.184208	95.69407	59.368419	57.766014	58.567217	0.214847	145.930571	0	0	-1	-1	0	0	117.585864	174.335027	144.574487	17.929153	0.124013	117.585864	174.298166	0.674625	209.78133	77.08498	46.62855	-0.00255	-0.00032	-0.00143	77.08498	209.73359	46.58156	-0.00289
Au1Sn1Sr1	icsd_412013	Sr			1	0	0	111	orthorhombic	62	Pnma (62)	8.161328	27.352151	223.229864	36	0	10.388889	48.859723	44.712904	46.786314	27.119998	25.952066	26.536032	0.31776	66.950537	-0.936329	-0.351123	0	0	-0.789352	0.613941	52.331514	89.711833	66.718776	9.938335	0.148959	52.645121	81.711753	0.644278	61.25444	24.76182	24.23737	0.00218	-0.01003	-0.00698	24.76182	104.66539	43.60215	-0.03212
Au1Sn1Y1	icsd_415826	Sn			0	0	1	111	hexagonal	186	P6_3mc (186)	9.066858	24.698921	223.941599	6	0	8.666667	73.939266	71.219094	72.57918	40.357863	39.126859	39.742361	0.195504	100.824226	0	0	-1	-0.768221	0	0.640184	89.279312	104.128951	100.200677	3.34376	0.033371	89.279312	95.511098	0.934753	133.6225	66.75731	39.87436	-0.01692	-0.00295	-0.00727	66.75731	133.75747	39.8401	0.00283
Au2Ca1Ge2	icsd_025333	Ca	Au		0	0	1	122	tetragonal	139	I4/mmm (139)	9.093774	21.155912	192.38708	5	0	11.6	73.19221	70.395242	71.793726	23.98104	19.516967	21.749004	1.183371	59.262714	-0.707107	0.707107	0	-0.970143	0	0.242536	32.025989	83.644358	54.569328	12.874453	0.235928	69.519711	48.207024	1.442108	111.41288	33.92333	61.47664	-1.5424	-3.96679	0.21067	33.92333	111.22077	61.42579	-3.88881
Au2Ca1Si2	icsd_000412	Ca			0	0	1	122	tetragonal	139	I4/mmm (139)	8.429959	19.31128	162.79329	5	0	12.4	81.572122	69.982591	75.777356	36.669199	28.087422	32.378311	1.693296	85.025039	-0.704934	-0.704934	-0.078326	-0.747409	0	0.664364	30.765887	115.964924	81.144071	23.178019	0.28564	88.560758	63.035235	1.404941	131.37016	30.06719	66.6835	-2.58751	-1.0705	-11.68974	30.06719	129.60407	66.54904	-1.24475
Au2Ge2Sr1	icsd_025334	Sr	Au		0	0	1	122	tetragonal	139	I4/mmm (139)	9.385135	22.181477	208.176147	5	0	11.6	68.758888	67.870453	68.31467	31.986611	29.076387	30.531499	0.513535	79.718453	-0.707107	0.707107	0	0	-0.957826	0.287348	53.226961	97.270915	76.433416	11.22848	0.146905	79.623998	69.244557	1.149895	119.72185	25.13196	52.76773	1.13963	-1.36281	0.36064	25.13196	119.72502	52.75591	-1.40695
Au2La1Si2	icsd_106686	La	Au		0	0	1	122	tetragonal	139	I4/mmm (139)	9.679352	20.209479	195.614659	5	0	11.4	100.792717	100.237592	100.515154	52.739706	46.66725	49.703478	0.65615	128.010563	0	-0.099504	0.995037	-0.759257	0	-0.650791	80.639386	165.975311	127.931989	20.124273	0.157304	80.779587	104.368343	0.773986	166.90697	45.75293	83.51331	-0.86626	0.63752	-2.63894	45.75293	166.93543	83.48786	0.61126
Au2Sc2Sn1	icsd_130046	Sc			0	0	1	122	tetragonal	136	P4_2/mnm (136)	9.389534	21.312365	200.113177	20	0	9.95	89.378664	89.370916	89.37479	42.949309	39.55645	41.252879	0.42895	107.256455	-1	0	0	0	0	-1	74.410276	127.156878	108.294276	12.948945	0.119572	127.156878	95.30608	1.334195	130.64839	83.3891	55.19102	0.02094	-0.01193	0.00739	83.3891	130.66004	55.16653	-0.03505
Au2Si2Sr1	icsd_000413	Sr			0	0	1	122	tetragonal	139	I4/mmm (139)	8.767925	20.367689	178.582357	5	0	12.4	84.421348	83.293442	83.857395	43.148323	39.11787	41.133096	0.528709	106.058314	-0.707107	-0.707107	0	-0.780869	0	-0.624695	73.151956	130.86275	105.710903	14.917955	0.14112	73.626237	87.189419	0.84444	139.2061	34.35983	70.37964	-0.27282	-0.35485	-1.14188	34.35983	139.21365	70.39603	-0.3644
Au2Si2Y1	icsd_055943	Y	Au		0	0	1	122	tetragonal	139	I4/mmm (139)	9.396398	19.050854	179.009398	5	0	11.4	110.392373	108.615997	109.504185	51.666264	47.512472	49.589368	0.453481	129.256655	-0.707107	-0.707107	0	-0.780869	0	-0.624695	79.638552	158.163505	127.073435	18.67926	0.146996	115.065624	106.809405	1.077299	178.18431	51.34669	87.75907	0.43	1.5372	-4.01843	51.34669	178.17671	87.72748	1.53961
Au2Sn1Y2	icsd_658827	Y			0	0	1	122	tetragonal	136	P4_2/mnm (136)	9.2315	24.839454	229.305407	20	0	10.15	75.140946	75.106343	75.123644	34.151473	31.124742	32.638107	0.486687	85.528174	0	-1	0	-0.436852	-0.436852	-0.786334	57.241325	101.440631	86.794461	11.41742	0.131545	96.218728	72.647887	1.324453	104.42906	67.76873	51.28671	-0.00846	-0.0092	-0.00047	67.76873	104.40761	51.27779	0.00633
Au3Ba1Ge1	icsd_181530	Ba	Au		0	0	1	113	tetragonal	129	P4/nmm (129)	10.851653	24.510003	265.974045	10	0	12	60.735467	60.240991	60.488229	20.610468	15.844779	18.227624	1.512075	49.691498	-1	0	0	-0.707107	0.707107	0	24.405263	74.848089	49.980145	11.970044	0.239496	62.751218	46.503589	1.349384	71.48299	57.16381	47.8136	-0.02211	-0.01232	-0.00437	57.16381	71.56958	47.70542	-0.04228
Au3Cs1S2	icsd_082540	Cs	Au		0	0	1	123	trigonal	164	P-3m1 (164)	6.544064	33.322739	218.066148	6	2.6631	10	7.954861	7.13173	7.543296	3.073677	2.913804	2.99374	0.389755	7.931898	0	0	-1	0	-0.894427	-0.447214	5.794841	9.828241	7.876614	0.919619	0.116753	5.794841	8.251413	0.702285	13.62176	7.76441	5.11522	-0.55884	-0.00455	0.007	7.76441	13.66985	5.14482	0.58391
Au3Cs1Se2	icsd_082542	Cs	Au		0	0	1	123	trigonal	164	P-3m1 (164)	7.001492	34.853018	244.023137	6	2.5625	10.833333	7.95389	7.122972	7.538431	3.836788	2.569716	3.203252	2.582048	8.417494	0	0	-1	0	-0.857493	-0.514496	4.458412	15.853151	7.75447	2.622197	0.338153	4.458412	6.904822	0.645695	13.80884	6.58894	5.77182	-2.4028	-0.0063	-0.00033	6.58894	13.80734	5.76352	2.4014
Au3K3Sb2	icsd_078977	K			0	0	1	233	trigonal	166	R-3m (166)	6.175634	31.987788	197.544877	8	1.2124	12.625	18.739393	18.007791	18.373592	9.888632	5.387806	7.638219	4.217491	20.125779	0	-0.857493	0.514496	0	-0.874157	-0.485643	8.065388	35.842614	16.713166	6.792484	0.406415	30.241969	14.822446	2.040282	29.04705	9.08566	13.22888	-6.85559	0.00348	-0.00482	9.08566	29.06551	13.24252	6.87771
Au3Li1Sn4	icsd_412207	Sn			0	0	1	134	hexagonal	186	P6_3mc (186)	9.319151	23.892037	222.653489	16	0	7.25	61.749447	61.72507	61.737258	22.048404	21.242685	21.645544	0.190041	58.141665	-0.780869	0	0.624695	0	0	-1	50.950074	79.206861	56.550896	4.951472	0.087558	79.206861	62.546886	1.26636	92.18655	50.302	42.11007	-0.0069	0.00984	0.15321	50.302	90.94559	41.86433	-0.00361
Au3Rb1Se2	icsd_082541	Rb	Au		0	0	1	123	trigonal	164	P-3m1 (164)	7.121975	32.420005	230.89446	6	2.2425	11	9.442809	8.606567	9.024688	4.030045	3.279487	3.654766	1.241486	9.660248	0	0	-1	0	-0.83205	-0.5547	5.777008	15.041622	9.392756	2.088541	0.222357	5.777008	8.414661	0.686541	15.55616	8.60616	6.76905	-1.60635	-0.01332	0.01031	8.60616	15.54993	6.77704	1.63478
Au3Rb3Sb2	icsd_078978	Rb			0	0	1	233	trigonal	166	R-3m (166)	6.416464	35.287234	226.419259	8	1.3094	12.5	16.494139	15.408563	15.951351	8.203255	3.999505	6.10138	5.325791	16.234274	0	-0.857493	0.514496	0	-0.894427	-0.447214	5.818566	29.621526	12.86252	5.74663	0.446773	27.17709	11.293235	2.406493	24.22174	7.63872	12.08458	-5.89312	-0.00084	-0.00934	7.63872	24.23954	12.09485	5.87968
Au6Cs4S5	icsd_082557	Cs			0	0	1	456	trigonal	157	P31m (157)	5.743275	36.116773	207.428551	15	2.7024	8.6	8.149831	7.32784	7.738836	3.472617	2.321043	2.89683	2.592899	7.726428	-0.444444	-0.777778	-0.444444	-0.421637	0.737865	0.527046	4.268111	14.123592	6.997095	2.350068	0.335863	5.484938	5.910047	0.92807	13.53163	7.92463	5.46027	-0.0029	2.08482	-0.00089	7.92463	13.65528	5.54589	0.01239
Au7Ge2K4	icsd_079111	Au			0	0	1	247	trigonal	166	R-3m (166)	7.755177	27.678131	214.648803	13	0	12.769231	37.99628	37.454474	37.725377	12.333002	10.622042	11.477522	0.819848	31.262177	-0.813733	0.464991	0.348743	0	0	-1	20.761533	43.975195	30.415285	6.578319	0.216283	43.975195	24.780401	1.774596	48.59004	30.81064	29.13628	-3.17657	-0.49698	0.58478	30.81064	49.49077	29.30883	3.84312
B1Cr3O6	icsd_051704	O			0	0	1	136	orthorhombic	62	Pnma (62)	4.721013	9.243407	43.638245	40	0.108	4.225	204.130371	203.464113	203.797242	113.826199	111.79027	112.808234	0.094335	285.708471	0	-1	0	-0.46569	-0.543305	-0.698535	246.991866	316.973496	289.460634	17.828141	0.061591	253.588373	260.851425	0.972156	333.94692	122.54711	139.16786	-0.89222	0.45845	3.57344	122.54711	327.27961	152.25645	-0.45887
B1Fe1Nb1	icsd_020298	B			0	0	1	111	hexagonal	189	P-62m (189)	7.871339	11.220434	88.31984	9	0	8.777778	264.695809	264.686886	264.691347	168.181711	166.236325	167.209018	0.058546	414.372249	0	-0.274721	0.961524	0	-0.874157	0.485643	381.06728	442.103882	416.143404	18.691702	0.044916	394.416053	393.467645	1.00241	473.20639	161.82759	163.00775	0.61118	-0.27443	-0.03651	161.82759	478.19372	152.87055	-18.01721
B1Fe3O6	icsd_001910	O			0	0	1	136	orthorhombic	62	Pnma (62)	5.297324	8.599742	45.555619	40	0	3.625	218.155734	218.080072	218.117903	131.195045	130.031521	130.613283	0.045087	326.640306	0	0	-1	0	-0.743294	0.668965	299.518849	356.627766	328.505649	13.643581	0.041532	299.518849	308.593866	0.970592	384.23626	131.18075	131.0343	0.02647	0.00197	0.00441	131.18075	386.63795	146.73068	-0.05041
B1Ge2Nb5	icsd_614401	B			0	0	1	125	tetragonal	140	I4/mcm (140)	7.754609	16.612192	128.821049	16	0	7.25	181.598674	179.184025	180.39135	106.005501	101.515626	103.760563	0.234618	261.201011	0	0	-1	0	-0.894427	-0.447214	172.903137	290.919615	263.189198	24.729218	0.09396	172.903137	266.498206	0.648797	346.32194	94.23969	126.78443	-0.02003	0.00374	-0.0719	94.23969	346.50233	126.81794	0.02906
B1Mg3N3	icsd_079623	B			0	0	1	133	hexagonal	194	P6_3/mmc (194)	2.363735	12.619634	29.829468	14	1.3752	3.642857	102.62057	101.770237	102.195403	42.544768	37.098643	39.821706	0.742361	105.731872	-0.778499	0.07785	-0.622799	0	0	-1	85.132461	203.567416	97.832907	16.502966	0.168685	203.567416	110.380814	1.844228	156.94036	82.47086	54.16476	-0.00132	-0.02089	0.00334	82.47086	156.97497	54.16262	0.00023
B1Na1Pt3	icsd_068092	Na			0	0	1	113	hexagonal	191	P6/mmm (191)	13.776887	14.922982	205.592226	10	0	11.1	151.870416	148.647096	150.258756	62.418547	27.495642	44.957095	6.37231	122.64007	-0.696311	-0.174078	-0.696311	0	0	-1	49.728691	356.007172	87.602371	48.991567	0.559249	356.007172	200.871279	1.772315	246.83025	100.44829	71.67286	0.01227	-0.01617	0.06957	100.44829	246.981	71.61039	-0.01385
B2Ba1Rh2	icsd_008155	Ba			0	0	1	122	tetragonal	139	I4/mmm (139)	6.880495	17.606237	121.139625	5	0	14.2	101.942227	85.805586	93.873906	65.497114	45.135258	55.316186	2.443709	138.704247	-0.640184	0	-0.768221	-0.707107	-0.707107	0	80.885321	271.76872	125.8389	52.650735	0.418398	116.672175	244.326514	0.477526	247.08061	88.33316	31.08631	-0.00835	0.17062	0.05454	88.33316	247.15384	30.99457	0.23439
B2Co1Mo2	icsd_613166	Mo			1	0	0	122	orthorhombic	71	Immm (71)	8.741913	10.35141	90.491126	5	0	8.4	305.421831	305.296894	305.359362	192.066851	190.593583	191.330217	0.039059	474.820583	-0.744845	0.662085	0.082761	0	-0.780869	0.624695	438.884943	517.032405	475.763849	18.692706	0.03929	466.218155	490.310212	0.950864	553.86523	156.48054	198.27703	0.15642	1.51365	-0.02711	156.48054	562.99317	188.79272	-0.06804
B2Co1Nb1	icsd_041893	Nb			0	0	1	112	orthorhombic	62	Pnma (62)	7.400475	9.730445	72.009918	16	0	7.625	276.333267	276.320105	276.326686	177.637118	172.955672	175.296395	0.135384	434.095259	0	-1	0	0	-0.514496	0.857493	359.370451	493.459657	434.325964	30.037081	0.069158	469.65246	431.242167	1.089069	505.89017	195.28206	122.59849	-0.05819	-0.01776	-0.06509	195.28206	464.79258	170.96726	-0.05039
B2Co1O4	icsd_422063	Co			1	0	0	124	monoclinic	15	C2/c (15)	4.142875	8.27705	34.290789	14	1.3716	4.142857	167.048751	70.122044	118.585398	108.305017	45.397418	76.851217	8.310801	189.59659	-0.574989	0.638877	-0.511101	-0.174078	-0.696311	-0.696311	30.783617	440.866232	182.781062	113.00437	0.61825	284.576148	215.875775	1.31824	331.86484	111.00772	62.24507	33.56797	-12.20446	16.25145	111.00772	277.9548	103.34599	67.45788
B2Co1W2	icsd_016776	W			1	0	0	122	orthorhombic	71	Immm (71)	14.272253	10.430195	148.862385	5	0	8.2	332.113813	332.093415	332.103614	206.048476	203.809831	204.929154	0.054981	509.905943	0	0	-1	-0.248069	-0.744208	-0.620174	439.173829	552.034561	513.344912	22.272175	0.043386	508.103141	507.299233	1.001585	605.72776	174.13849	214.91579	1.4597	-1.04183	-1.1046	174.13849	595.24723	223.3107	2.07398
B2Co2La1	icsd_181185	La			0	0	1	122	tetragonal	139	I4/mmm (139)	6.917941	13.36478	92.45676	5	0	13.6	137.979139	131.777232	134.878186	75.478169	70.493696	72.985933	0.400604	185.498515	-0.351123	0	0.936329	-0.707107	0.707107	0	151.855263	266.11455	185.137838	29.831586	0.161132	152.651714	225.574344	0.676725	251.93539	122.22579	77.27325	0.11924	-0.30435	0.02971	122.22579	249.06042	78.33588	0.1036
B2Co2Y1	icsd_602345	Y	Co		0	0	1	122	tetragonal	139	I4/mmm (139)	6.275615	12.086703	75.851499	5	0	11.6	150.384099	141.539361	145.96173	111.044757	103.70113	107.372944	0.416566	258.68677	-0.123091	-0.123091	0.984732	-0.707107	-0.707107	0	187.582136	340.79978	256.116375	44.058253	0.172024	188.796674	328.7654	0.57426	351.9653	80.08246	70.14578	4.08037	-5.9046	1.5409	80.08246	352.16933	68.78854	-4.82636
B2Co5P1	icsd_613222	P			0	0	1	125	tetragonal	140	I4/mcm (140)	8.1251	8.8713	72.080198	16	0	7.75	253.361366	250.402994	251.88218	92.998771	75.98275	84.490761	1.131544	227.981132	0	0	-1	-0.617802	0.556022	-0.556022	99.340401	301.854781	234.473274	46.471173	0.198194	99.340401	199.335828	0.498357	359.64354	196.20179	223.43417	-1.13703	0.06751	0.88722	196.20179	358.4395	222.31029	-0.02517
B2Cr1Nb2	icsd_613529	Nb			0	0	1	122	tetragonal	127	P4/mbm (127)	7.220064	11.933274	86.159001	10	0	9.9	248.870481	248.830783	248.850632	183.240393	181.6132	182.426796	0.044958	439.809024	0	0	-1	0	-0.743294	0.668965	402.685888	465.780222	443.065984	18.018816	0.040668	402.685888	413.605701	0.973598	475.18227	123.95126	144.51572	0.04263	-0.03306	-0.04076	123.95126	476.58073	140.38255	-0.01047
B2Cr1Ta2	icsd_613557	Ta			0	0	1	122	tetragonal	127	P4/mbm (127)	12.560261	11.515488	144.637531	10	0	9.9	276.65198	276.581184	276.616582	207.656542	205.703069	206.679805	0.047739	496.406061	0	0	-1	0	-0.743294	-0.668965	457.242068	528.161121	499.563107	21.374338	0.042786	457.242068	464.783574	0.983774	534.88963	132.21177	158.21702	0.01563	0.01057	0.00688	132.21177	536.07568	153.91074	0.01095
B2Cr5P1	icsd_613539	P			0	0	1	125	tetragonal	140	I4/mcm (140)	6.438992	10.076208	64.880626	16	0	8.5625	255.242374	252.81062	254.026497	156.889607	155.670366	156.279986	0.04878	389.056057	0	0	-1	-0.668965	-0.743294	0	328.010171	422.108138	390.484188	22.263537	0.057015	328.010171	414.35241	0.791621	487.30761	158.29307	153.44631	1.41441	-0.0474	0.11165	158.29307	488.49279	149.428	-0.35367
B2Fe1Mo2	icsd_044292	B			0	0	1	122	tetragonal	127	P4/mbm (127)	8.478244	10.552364	89.465512	10	0	10	293.031873	292.302152	292.667012	170.836396	159.229771	165.033084	0.366958	416.762642	0	0	-1	-0.549972	-0.549972	0.628539	304.317133	496.82349	426.874977	47.694746	0.11173	304.317133	361.021814	0.842933	452.46539	186.75694	224.28908	-0.10925	-0.11265	0.09843	186.75694	452.48574	224.27219	0.15075
B2Fe1O4	icsd_420403	Fe			1	0	0	124	monoclinic	15	C2/c (15)	4.399481	7.627765	33.558208	14	2.3896	4.285714	220.065876	215.342556	217.704216	151.795751	147.571913	149.683832	0.165045	365.324487	-0.789352	0	-0.613941	-0.116248	-0.348743	0.929981	290.184358	447.809635	364.783814	35.66441	0.097769	340.006465	397.496898	0.855369	385.72835	119.13749	97.31169	0.00374	-19.43853	-0.02085	119.13749	376.74058	143.96361	0.03001
B2Fe1W2	icsd_043016	W			0	0	1	122	tetragonal	127	P4/mbm (127)	13.962752	10.58794	147.836771	10	0	10	326.422931	326.408564	326.415748	146.084459	127.604055	136.844257	0.724175	360.197245	0	-1	0	-0.556022	-0.556022	0.617802	221.452139	459.830648	370.139583	58.400182	0.157779	304.118216	305.973462	0.993937	435.78048	289.07092	251.22948	8.2129	-4.96638	0.16402	289.07092	436.49914	252.81785	-7.95113
B2Fe1W2	icsd_614261	W			1	0	0	122	orthorhombic	71	Immm (71)	14.100546	10.484471	147.836771	5	0	8.2	333.512477	333.239313	333.375895	190.426334	180.11865	185.272492	0.286956	468.945809	-0.099015	-0.099015	0.990148	-0.099504	0.79603	0.597022	313.862885	552.108006	474.970211	46.894902	0.098732	411.983299	455.472907	0.904518	564.2145	178.84755	264.58021	-12.53182	-3.01087	-0.19204	178.84755	599.85902	232.81412	2.71838
B2Fe2Y1	icsd_614264	Y	Fe		0	0	1	122	tetragonal	139	I4/mmm (139)	5.78654	12.753782	73.800272	5	0	11.6	132.161112	129.708154	130.934633	80.676793	63.046995	71.861894	1.417059	182.24474	-0.379049	-0.530669	-0.758098	-0.099504	-0.995037	0	116.265994	322.665013	164.278791	44.346231	0.269945	197.080031	257.808632	0.764443	287.23111	41.01189	71.75311	7.13779	5.67864	11.29661	41.01189	338.87929	57.2578	5.32889
B2Fe5Si1	icsd_614183	Si			0	0	1	125	tetragonal	140	I4/mcm (140)	7.48755	9.118556	68.275647	16	0	8.75	264.856528	261.721947	263.289237	139.427315	136.446561	137.936938	0.121205	352.289462	0	0	-1	-0.59655	0.59655	-0.536895	291.374086	386.296389	357.595934	20.667144	0.057795	291.374086	342.402052	0.850971	442.07043	214.46954	172.52857	0.95999	-0.32549	0.22186	214.46954	440.902	172.35101	-0.19501
B2Hf1O5	icsd_417031	Hf			1	0	0	125	monoclinic	14	P2_1/c (14)	6.589933	8.822773	58.141482	32	4.7427	3.8125	222.765902	218.399416	220.582659	137.839961	135.379535	136.609748	0.110865	339.701947	-0.752577	0	-0.658505	-0.264906	0.264906	0.927173	266.849705	379.712814	337.444552	30.635984	0.090788	334.002571	366.800273	0.910584	388.81277	135.51144	101.45466	0.02924	-26.29298	0.02091	135.51144	436.63899	141.8093	0.02857
B2Li2Se5	icsd_411410	Li			0	0	1	225	monoclinic	15	C2/c (15)	4.201925	18.89442	79.392942	18	1.6437	4.166667	43.099806	42.077829	42.588817	30.762929	27.400376	29.081652	0.637884	71.068622	0	-1	0	-0.407307	0.61096	-0.678844	52.745273	99.950092	70.398891	12.360782	0.175582	73.767545	66.637369	1.107	79.13713	27.47227	21.23446	-0.01246	-4.6655	-0.00906	27.47227	68.28611	26.85757	-0.04661
B2Mg1Ni3	icsd_086024	Ni			0	0	1	123	hexagonal	180	P6_222 (180)	6.242874	9.841929	61.441928	18	0	11.277778	192.344387	191.687886	192.016136	87.81092	77.720193	82.765556	0.652595	217.103627	-0.646762	-0.404226	-0.646762	0	0	-1	173.366495	379.196092	201.984192	31.690983	0.156898	379.196092	240.619575	1.575915	315.60974	146.93322	95.69526	-0.38579	0.12435	-0.2421	146.93322	317.65624	96.72106	-0.33645
B2Mg1Ni3	icsd_156018	Ni			0	0	1	123	hexagonal	181	P6_422 (181)	6.242734	9.84215	61.441928	18	0	11.333333	192.055301	191.37127	191.713286	87.800987	77.7112	82.756093	0.652759	217.038854	-0.71247	-0.284988	-0.641223	0	0	-1	172.9184	379.257997	201.923485	31.686903	0.156925	379.257997	240.477106	1.577106	314.29854	146.48099	95.049	-0.18237	-0.60272	0.07244	146.48099	318.09395	96.96775	-0.22728
B2Mn1Mo2	icsd_614755	Mo			0	0	1	122	tetragonal	127	P4/mbm (127)	8.399141	10.615884	89.164305	10	0	9.9	298.443628	298.357066	298.400347	156.022855	132.596357	144.309606	0.883666	372.827666	0	-1	0	-0.549972	-0.549972	0.628539	218.841867	487.640191	382.443008	64.676176	0.169113	301.43693	305.82206	0.985661	407.69496	258.0749	222.96005	-1.27586	0.34185	-0.16202	258.0749	405.0313	228.21737	1.64948
B2Mn1W2	icsd_614787	W			0	0	1	122	tetragonal	127	P4/mbm (127)	13.768637	10.715336	147.535565	10	0	9.9	321.156069	319.481229	320.318649	164.866877	108.737667	136.802272	2.586188	359.262053	0	0	-1	-0.57735	0.57735	0.57735	139.815876	546.012399	360.722649	102.438349	0.283981	139.815876	260.880873	0.535938	443.76756	264.04663	255.43732	0.86678	-0.68096	-0.49933	264.04663	420.51373	305.43698	-2.3573
B2Mo2Nb1	icsd_614821	Mo			0	0	1	122	tetragonal	127	P4/mbm (127)	8.299087	12.263263	101.773884	10	0	9.9	265.714607	265.669071	265.691839	155.897732	153.719117	154.808425	0.071035	388.894065	-0.314485	0.943456	0.104828	0	0	-1	359.973339	445.048873	386.18248	17.648787	0.045701	445.048873	372.508898	1.194734	474.18599	191.35003	136.53431	4.33304	4.30598	1.75533	191.35003	461.61792	146.78212	-5.23854
B2Mo2Ni1	icsd_614823	Mo			1	0	0	122	orthorhombic	71	Immm (71)	8.669571	10.4286	90.411488	5	0	8.4	295.300717	295.102656	295.201686	179.623144	174.452518	177.037831	0.148867	442.629223	0	0	-1	-0.743294	0	-0.668965	358.133713	518.071037	446.988566	31.945222	0.071468	401.076332	412.986358	0.971161	505.85493	156.43063	214.29751	-0.12729	-2.26587	-0.91618	156.43063	519.53278	201.36083	3.11345
B2Mo2Ta1	icsd_614842	Mo			0	0	1	122	tetragonal	127	P4/mbm (127)	10.845475	12.079982	131.013149	10	0	10	279.105708	278.419031	278.762369	163.885955	161.689334	162.787644	0.070394	408.789857	-0.874157	0.485643	0	-0.611593	0.08737	0.786334	359.552046	437.803783	407.464144	15.370052	0.037721	412.138597	389.062239	1.059313	491.38242	191.85041	178.27406	0.95444	-1.72044	6.0422	191.85041	503.67052	142.48095	-1.35237
B2Mo5Si1	icsd_044489	Si			0	0	1	125	tetragonal	140	I4/mcm (140)	8.476483	12.966281	109.908467	16	0	8.625	260.71141	259.367015	260.039213	146.33606	144.532893	145.434477	0.067562	367.745906	0	0	-1	-0.847998	0	-0.529999	295.353453	392.221876	370.162896	18.479863	0.049924	295.353453	363.805547	0.811844	469.73847	160.79801	173.56073	-0.03336	0.09874	-0.31213	160.79801	469.64096	173.6646	-0.02058
B2Ni1O4	icsd_418385	Ni			1	0	0	124	monoclinic	15	C2/c (15)	4.096909	8.356032	34.233905	14	0.9121	3.928571	156.677136	110.021015	133.349075	101.516695	69.527985	85.52234	2.724485	211.378415	-0.615457	0.615457	-0.492366	-0.154303	0.617213	0.771517	68.4234	399.249183	208.837899	85.797689	0.410834	264.894253	241.792448	1.095544	318.1349	100.73385	49.64205	15.03306	-24.32974	23.25239	100.73385	253.33518	105.06826	55.70318
B2Ni1W2	icsd_615069	W			1	0	0	122	orthorhombic	71	Immm (71)	14.160146	10.507148	148.782747	5	0	8.4	319.929271	319.677427	319.803349	202.650123	199.194888	200.922505	0.087518	498.392646	0	0	-1	-0.707107	0	-0.707107	435.444953	568.20024	503.592088	28.633246	0.056858	447.031813	468.268872	0.954648	558.32809	178.75276	225.50957	0.99646	-0.08814	-0.15179	178.75276	563.6576	196.00638	2.29671
B2O5Zr1	icsd_418931	Zr			1	0	0	125	monoclinic	14	P2_1/c (14)	4.450218	8.994595	40.02791	32	4.1574	3.78125	217.020918	213.418303	215.219611	131.095585	129.164256	130.12992	0.091643	324.906228	-0.780869	0	-0.624695	-0.235702	0.235702	0.942809	258.632501	360.286565	323.237108	26.473	0.0819	310.907493	350.540779	0.886937	366.98319	134.49393	104.3758	0.01364	-22.56607	0.04409	134.49393	420.44063	139.8424	0.01509
B2Si1V5	icsd_044490	Si			0	0	1	125	tetragonal	140	I4/mcm (140)	5.487947	11.513707	63.186614	16	0	7.75	219.605971	219.099717	219.352844	164.347033	163.668036	164.007534	0.023054	393.860889	0	0	-1	-0.894427	0	-0.447214	353.798949	415.604035	394.122793	11.065918	0.028077	353.798949	392.391603	0.901648	453.91985	105.86214	114.10532	-0.01296	1.70865	0.17836	105.86214	454.00446	114.13434	0.36354
B3Bi1O6	icsd_173746	Bi			0	0	1	136	triclinic	1	P1 (1)	4.496615	12.460084	56.028206	10	3.9381	2.4	68.588822	31.685271	50.137047	40.160251	11.554984	25.857618	13.542583	66.193359	0	-1	0	-0.622799	-0.07785	0.778499	13.747056	237.523962	51.451522	43.490802	0.845277	62.823317	55.985757	1.12213	157.20553	67.7472	59.10262	0.09225	-50.44158	2.17644	67.7472	50.63837	13.56345	0.85117
B3Bi1O6	icsd_245897	Bi			0	0	1	136	monoclinic	5	C2 (5)	4.49751	12.457607	56.028206	10	3.9395	3.2	68.552184	31.577072	50.064628	40.183949	11.574179	25.879064	13.530256	66.226138	0	-1	0	-0.640184	0	0.768221	13.705115	241.799828	51.364119	43.508687	0.847064	59.274548	58.404785	1.014892	164.0561	67.87325	59.78307	0.02711	-51.23018	0.02483	67.87325	50.57172	13.02989	0.01834
B3Br1La2	icsd_417603	La	B	Br	0	0	1	123	hexagonal	187	P-6m2 (187)	5.490136	19.667268	107.975964	24	0	7.958333	66.429162	63.012322	64.720742	48.364455	42.311101	45.337778	0.769564	110.265767	-0.336861	0.421076	-0.842152	-0.099504	0.995037	0	81.698639	152.643347	105.934328	23.62432	0.223009	89.46479	152.481109	0.586727	163.56763	28.26408	28.9522	0.00268	0.02231	0.01696	28.26408	163.6987	28.97744	0.02155
B3Cl1La2	icsd_417604	La	B	Cl	0	0	1	123	hexagonal	174	P-6 (174)	5.084885	18.815345	95.673863	24	0	7.333333	70.510024	64.523854	67.516939	48.148115	39.451413	43.799764	1.194979	108.037228	-0.492366	0.123091	0.86164	-0.650791	0.759257	0	73.52416	160.21087	102.651277	28.595908	0.278573	78.538702	160.074001	0.49064	174.48529	30.66639	33.65122	0.00549	-0.01526	-0.01367	30.66639	174.65473	33.62488	0.0116
B3Co1V1	icsd_044188	V			0	1	0	113	orthorhombic	63	Cmcm (63)	6.020399	7.850225	47.261489	10	0	7.9	290.036646	286.772661	288.404653	197.427469	192.15738	194.792425	0.148511	476.988991	-0.863868	-0.431934	0.259161	0	-1	0	400.404455	572.170494	470.879345	43.568159	0.092525	572.170494	463.125852	1.235454	484.58389	157.23367	147.04047	2.20249	9.05721	-1.19787	157.23367	639.55732	140.43995	-1.56911
B3Rh7Zn5	icsd_107495	Zn			0	0	1	357	orthorhombic	51	Pmma (51)	9.65621	12.377779	119.522427	30	0	9.9	187.249289	185.928165	186.588727	81.624981	77.774413	79.699697	0.254653	209.299026	0	-0.573462	-0.819232	0	-1	0	180.52346	318.16218	202.8452	20.725152	0.102172	201.719844	224.843823	0.897155	291.4833	114.90597	141.8063	-0.01622	0.04479	0.04682	114.90597	377.97165	111.22733	-0.01667
B4Co1Sc1	icsd_613278	B			0	0	1	114	orthorhombic	55	Pbam (55)	4.641319	8.773377	40.720038	24	0	8.458333	224.003237	218.785573	221.394405	178.708968	172.29046	175.499714	0.210118	416.457071	0	-0.581238	0.813733	-0.707107	0.707107	0	350.936222	519.304276	411.360406	49.92442	0.121364	375.737507	499.620545	0.752046	515.72435	125.96656	79.27101	0.07615	-0.00198	-0.0071	125.96656	516.11869	88.03597	0.07682
B4Co2Mo1	icsd_044175	Co			0	1	0	124	orthorhombic	71	Immm (71)	7.436795	8.200064	60.982193	7	0	8.714286	304.536598	303.393813	303.965206	189.287253	187.29684	188.292046	0.056902	468.200192	-0.846649	0.376288	-0.376288	-0.099504	0.995037	0	407.46137	546.315232	463.917519	25.832724	0.055684	544.084761	451.615622	1.204752	530.86295	165.37816	174.06158	0.64964	-7.35733	15.59495	165.37816	623.05671	171.20508	-0.68716
B4Cr1Y1	icsd_016171	B			0	0	1	114	orthorhombic	55	Pbam (55)	5.072171	10.047685	50.963582	24	0.1568	10.583333	205.319047	202.64417	203.981608	194.49279	192.213602	193.353196	0.072488	440.786459	0	0	-1	-0.8	0.6	0	351.731278	476.759531	443.046481	30.032037	0.067785	351.731278	471.815944	0.745484	495.74636	76.62239	79.31879	0.00185	0.09208	-0.05389	76.62239	488.62442	87.63923	-0.01484
B4Fe1Sc1	icsd_614180	B			0	0	1	114	orthorhombic	55	Pbam (55)	4.525032	8.809961	39.86536	24	0	10.166667	225.866973	221.180625	223.523799	192.77678	188.974047	190.875413	0.121803	445.746358	0	0	-1	-0.743294	-0.668965	0	370.929865	532.488406	446.411061	42.513757	0.095235	370.929865	506.390218	0.732498	519.15097	121.87816	84.58415	-0.02049	0.30873	0.00544	121.87816	511.48315	96.22696	-0.01901
B4Fe2Mo1	icsd_044293	Fe			0	1	0	124	orthorhombic	71	Immm (71)	7.189234	8.278633	59.517031	7	0	8.857143	305.783592	305.112364	305.447978	191.739745	189.096433	190.418089	0.072093	472.970135	-1	0	0	-0.476731	-0.667424	-0.572078	384.586969	507.624451	477.362205	25.161324	0.052709	471.218245	444.270153	1.060657	493.04233	207.95244	190.07779	-0.67716	0.28483	1.90013	207.95244	575.65369	169.17375	0.4855
B4La2Rh5	icsd_068539	Rh			0	1	0	245	orthorhombic	69	Fmmm (69)	8.692735	14.510729	126.137913	11	0	14.363636	174.123627	173.027665	173.575646	86.035212	82.772833	84.404022	0.203402	217.893899	-0.421637	-0.737865	0.527046	-1	0	0	188.767219	284.058603	211.449699	20.878356	0.098739	213.950148	249.415379	0.857807	334.20461	102.71916	99.45135	0.0346	0.0262	-0.06107	102.71916	269.96366	115.82115	0.00721
B4Mn1Y1	icsd_614788	B			0	0	1	114	orthorhombic	55	Pbam (55)	5.24762	9.866908	51.777784	24	0	10.416667	204.085519	201.607012	202.846266	193.166659	191.471064	192.318862	0.056572	438.40558	0	0	-1	-0.780869	0.624695	0	367.47471	480.049001	439.312173	28.577219	0.06505	367.47471	474.703537	0.774114	494.51659	79.66202	74.15305	-0.24507	0.11495	-0.82669	79.66202	490.02384	78.3778	0.16168
B4Mn2Mo1	icsd_614748	Mn			0	1	0	124	orthorhombic	71	Immm (71)	6.98601	8.457866	59.086736	7	0	8.571429	299.773792	299.206786	299.490289	174.906073	157.820184	166.363128	0.543204	421.114723	-1	0	0	-0.57735	-0.11547	0.80829	244.641582	510.151404	428.061982	55.975014	0.130764	355.178593	403.627348	0.879967	417.37927	234.19822	243.88167	-2.19607	1.53186	-0.91868	234.19822	487.03061	149.87894	-0.60504
B4Mn2W1	icsd_614782	Mn			0	1	0	124	orthorhombic	71	Immm (71)	9.408856	8.495572	79.933614	7	0	8.857143	310.371602	310.364121	310.367862	205.367573	199.610564	202.489069	0.14423	498.957797	-1	0	0	-0.406138	0	-0.913812	388.613514	553.713651	501.632724	31.639419	0.063073	458.704555	493.949107	0.928647	513.72258	231.93242	186.19215	0.98584	-3.6557	3.81436	231.93242	567.71	131.36199	0.07393
B4Mo1Y1	icsd_020081	B			0	0	1	114	orthorhombic	55	Pbam (55)	5.785234	10.912415	63.130875	24	0.3763	10.708333	208.372298	207.604253	207.988276	182.657093	181.31343	181.985261	0.040753	422.677795	0	0	-1	-0.639602	0.639602	-0.426401	355.232384	441.233599	425.654167	18.168148	0.042683	355.232384	431.390986	0.823458	461.49232	86.70654	93.98631	0.00784	0.07758	-0.00523	86.70654	456.54294	102.58652	-0.01985
B4Ni1Sc1	icsd_084184	B			0	0	1	114	orthorhombic	55	Pbam (55)	4.549352	8.936146	40.653674	24	0	7.833333	210.51964	203.954779	207.237209	146.583998	128.062701	137.323349	0.755322	337.43711	0	-0.668965	-0.743294	-0.707107	0.707107	0	224.908804	474.156324	321.372634	68.660445	0.213647	349.102408	456.87156	0.764115	478.29938	135.66883	72.40319	-0.15009	0.04797	-0.01662	135.66883	483.87709	74.83656	-0.14064
B4Rh1Y1	icsd_419358	B			0	0	1	114	orthorhombic	55	Pbam (55)	6.227212	10.446583	65.053087	24	0	10.666667	207.067564	206.192943	206.630253	148.110083	141.810131	144.960107	0.226368	352.458635	0	-0.5547	-0.83205	-0.743294	0.668965	0	299.189317	419.787262	346.785052	36.917266	0.106456	316.147975	411.577713	0.768137	444.48779	87.45516	108.99359	-0.02924	-1.03953	-0.0023	87.45516	439.52647	112.16069	-0.02104
B4Rh8Zn5	icsd_417990	Zn			0	1	0	458	orthorhombic	65	Cmmm (65)	9.613117	12.126	116.56865	17	0	9.588235	199.954534	197.148339	198.551437	86.014005	80.860641	83.437323	0.332891	219.557119	-0.622799	0.778499	-0.07785	0	0	-1	186.632768	344.589557	212.042669	27.854815	0.131364	202.402115	240.920191	0.840121	319.20865	146.6994	122.45507	-0.00955	-0.00452	0.07484	146.6994	282.21414	123.59703	-0.01539
B4Ru1Y1	icsd_615400	B			0	0	1	114	orthorhombic	55	Pbam (55)	6.206342	10.399862	64.545101	24	0	10.583333	216.765639	215.811264	216.288451	176.146439	174.517396	175.331917	0.051095	414.1004	0	0	-1	-0.759257	0.650791	0	363.385198	452.859998	414.30963	23.17526	0.055937	363.385198	445.003423	0.81659	475.95768	95.60528	98.82185	-0.01756	-0.16594	0.0102	95.60528	469.55502	107.735	-0.02527
B4V1Y1	icsd_615679	B			0	0	1	114	orthorhombic	55	Pbam (55)	4.896959	10.347587	50.671715	24	0	9.958333	202.132538	199.682266	200.907402	188.089227	184.464758	186.276992	0.110514	426.895033	0	0	-1	-0.562254	-0.722897	-0.40161	319.08139	457.280229	431.140808	30.822661	0.071491	319.08139	444.192229	0.718341	466.125	75.39707	93.94354	0.00507	-0.0484	-0.00169	75.39707	471.85732	95.28061	0.00773
B4W1Y1	icsd_615702	B			0	0	1	114	orthorhombic	55	Pbam (55)	7.98206	10.956098	87.452233	24	0.3792	10.5	215.079887	214.553136	214.816511	187.27859	186.301409	186.79	0.028681	434.447798	0	0	-1	-0.639602	0.639602	-0.426401	375.753918	450.074363	437.035046	15.554794	0.035592	375.753918	441.663814	0.850769	472.88831	89.67062	96.03594	0.00147	0.04943	-0.01072	89.67062	468.98574	105.21359	-0.00956
B6Co3La4	icsd_613134	Co			0	0	1	346	trigonal	166	R-3m (166)	6.608942	15.409505	101.84052	13	0	8.076923	81.255408	66.730104	73.992756	56.198509	26.563976	41.381242	5.795628	104.637229	-0.40161	-0.562254	0.722897	-0.485643	-0.874157	0	31.923193	217.9661	87.330191	51.209921	0.586394	97.003082	205.71281	0.471546	226.68883	52.37666	19.02148	6.41855	6.23377	-0.81452	52.37666	229.03487	16.31304	-7.3894
B6Co3Y4	icsd_613422	Co			0	0	1	346	trigonal	166	R-3m (166)	5.37138	14.203791	76.293963	13	0	7.461538	93.449054	80.175464	86.812259	59.640829	27.561358	43.601093	5.985203	112.045202	-0.298142	-0.596285	0.745356	-0.948683	0.316228	0	31.600913	230.686603	91.683654	53.375642	0.582172	111.391127	215.643043	0.516553	247.20243	53.98439	30.47102	6.05024	-4.1895	-9.55038	53.98439	243.83834	27.93103	-13.36782
B6Cr1Sc2	icsd_099646	B			0	0	1	126	orthorhombic	55	Pbam (55)	4.01195	9.50926	38.15068	36	0	10.25	210.759549	203.018216	206.888883	193.515649	185.955467	189.735558	0.241411	435.941062	0	0	-1	-0.976187	0.21693	0	289.89762	498.799599	439.74127	51.176758	0.116379	289.89762	486.339294	0.596081	525.48884	75.96278	84.47478	0.01336	-0.00219	-0.09061	75.96278	506.1698	110.63174	0.00363
B6Fe3Y4	icsd_614271	Fe			0	0	1	346	trigonal	166	R-3m (166)	5.46412	13.746141	75.110563	13	0	7.230769	110.146274	90.80523	100.475752	68.246845	11.244892	39.745868	25.558704	105.346704	-0.093659	-0.749269	0.65561	-0.961524	0.274721	0	9.388539	237.143793	63.446737	57.43058	0.905178	163.340483	168.319309	0.97042	255.07886	17.16536	66.37982	3.71556	-7.82208	-1.63696	17.16536	200.60077	68.93616	14.30326
B6Rh1Sc2	icsd_152716	B			0	0	1	126	orthorhombic	55	Pbam (55)	4.83742	9.828314	47.543684	36	0	10.305556	208.708171	204.793078	206.750625	160.869255	155.305075	158.087165	0.198254	377.935021	-0.514496	0	0.857493	-0.743294	0.668965	0	315.626794	459.693861	374.049618	43.299703	0.115759	326.766857	448.054967	0.729301	472.70955	103.76183	84.09483	0.01926	0.00452	-0.00414	103.76183	471.15667	100.94597	0.02369
B6Ru1Y2	icsd_615404	B			0	0	1	126	orthorhombic	55	Pbam (55)	5.74158	11.046251	63.422932	36	0	10.694444	191.929351	191.769165	191.849258	173.952377	172.055473	173.003925	0.05596	399.058705	0	0	-1	0	-1	0	345.601735	435.110249	400.202949	17.173876	0.042913	345.601735	409.629289	0.843694	410.81526	57.05698	101.57424	-0.00185	-0.00226	-0.01165	57.05698	455.75029	81.36019	-0.0049
B7Fe1Y3	icsd_064596	B			1	0	0	137	orthorhombic	63	Cmcm (63)	5.100864	11.785744	60.117474	22	0	9.590909	160.384847	160.077822	160.231334	135.495402	134.629396	135.062399	0.034081	316.311865	0	-1	0	0	-0.447214	0.894427	287.743143	335.626808	317.389739	10.215582	0.032186	298.629327	320.061595	0.933037	327.52221	78.64741	73.59249	0.008	0.01209	0.60152	78.64741	314.50125	69.51357	0.0129
B7Mn1Y3	icsd_614789	B			1	0	0	137	orthorhombic	63	Cmcm (63)	5.031658	11.920637	59.980562	22	0	9.227273	158.482247	157.988809	158.235528	138.638294	137.549962	138.094128	0.042685	320.924195	0	-1	0	-0.48795	0.39036	-0.78072	275.251042	340.176524	323.619542	14.244836	0.044017	302.228015	316.247632	0.955669	329.60528	76.03934	71.05192	-0.01629	-0.0037	-0.00919	76.03934	302.21194	72.91411	-0.01073
B7W1Y3	icsd_039663	B			1	0	0	137	orthorhombic	63	Cmcm (63)	6.391551	12.428806	79.439353	22	0	9.409091	166.952284	166.25208	166.602182	143.498237	140.543957	142.021097	0.109313	331.785681	0	-1	0	-0.527046	0.421637	-0.737865	264.522813	363.690166	336.188635	22.082419	0.065685	294.865913	321.827298	0.916224	329.50789	89.29471	78.0556	-0.01264	0.0081	0.3713	89.29471	300.44002	85.12025	-0.03298
Ba1Be2N2	icsd_415304	Ba			0	0	1	122	tetragonal	140	I4/mcm (140)	4.430332	13.745441	60.89686	10	1.2305	9.5	105.765694	90.51291	98.139302	68.695331	53.167177	60.931254	1.628829	151.450356	-0.668965	0	0.743294	-0.707107	-0.707107	0	102.377741	299.358051	142.770635	46.112356	0.322982	131.317234	221.38876	0.593152	222.80866	128.46504	28.37189	0.01293	0.00769	0.00319	128.46504	222.82952	28.34191	0.01061
Ba1Bi1Cu1	icsd_106303	Ba			0	0	1	111	hexagonal	194	P6_3/mmc (194)	7.110636	31.904199	226.859155	6	0	9.833333	36.980188	35.557729	36.268958	20.565449	20.176231	20.37084	0.136459	51.475305	0	0	-1	-0.085436	0.854358	-0.512615	45.560919	52.677633	51.184525	1.313015	0.025653	45.560919	50.769295	0.897411	68.69076	32.34246	19.34454	-0.00122	0.00034	0.17517	32.34246	68.95288	19.40998	-0.00218
Ba1Bi1O3	icsd_061499	Bi			1	0	-1	113	monoclinic	12	C2/m (12)	7.626656	17.170297	130.951948	10	0	5.9	105.592437	104.973026	105.282731	46.575264	43.291838	44.933551	0.385121	118.01191	-0.613572	0.690268	0.383482	-0.099504	0	-0.995037	92.062281	157.897489	112.165604	14.243793	0.126989	123.423424	115.22291	1.071171	192.4733	78.60672	65.83357	-0.11332	0.00347	0.33996	78.60672	175.69768	54.17882	-0.1076
Ba1Bi2Mg2	icsd_100049	Ba	Mg		0	0	1	122	trigonal	164	P-3m1 (164)	5.729532	35.004455	200.559143	5	0.4392	5.6	31.904884	31.882766	31.893825	21.492405	20.094482	20.793444	0.348531	51.244011	0	-0.874157	0.485643	0	-0.857493	-0.514496	40.847609	64.977773	50.663193	6.25404	0.123443	48.518392	49.432847	0.981501	60.59537	18.0608	18.2366	-6.11788	0.01969	0.0168	18.0608	60.5585	18.2144	6.16591
Ba1Br1F1	icsd_001129	Ba	Br	F	0	0	1	111	tetragonal	129	P4/nmm (129)	4.937693	26.481199	130.756028	6	4.8691	11.333333	36.609611	36.246898	36.428254	17.334731	16.133842	16.734286	0.382171	43.536335	0	0	-1	-0.619586	-0.619586	-0.4819	26.177164	48.617048	44.04052	5.06068	0.11491	26.177164	44.613096	0.58676	62.25167	22.17283	28.72484	-0.00321	0.03165	0.0001	22.17283	62.25749	28.72819	-0.00429
Ba1Cd1O2	icsd_025555	Ba			0	0	1	112	orthorhombic	62	Pmnb (62)	6.596844	17.729497	116.958721	16	0.9812	5.625	78.984156	78.76077	78.872463	36.472025	35.348985	35.910505	0.161687	93.535929	0	-0.707107	-0.707107	0	-1	0	80.812382	114.423204	90.808122	6.747847	0.074309	108.610402	101.179552	1.073442	135.84508	53.31367	57.80979	0.00056	-0.01123	0.0123	53.31367	137.92059	39.59494	-0.00239
Ba1Cd2Ge2	icsd_174263	Ba	Cd		0	0	1	122	tetragonal	139	I4/mmm (139)	6.445903	26.143911	168.521107	5	0	11.6	43.400717	43.21734	43.309028	25.882198	24.735167	25.308682	0.236106	63.547533	0	0	-1	-0.83205	0	-0.5547	50.456802	74.487526	63.089505	5.221006	0.082756	50.456802	58.486002	0.862716	80.34503	13.98041	32.33191	0.0005	1.1339	-0.4841	13.98041	81.66126	31.88482	-0.03493
Ba1Cd2P2	icsd_030915	Ba	Cd		0	0	1	122	trigonal	164	P-3m1 (164)	5.351203	26.32039	140.845745	5	0.6809	5.6	50.716464	50.658085	50.687275	32.141583	31.524962	31.833272	0.098951	78.968263	-0.65561	-0.374634	-0.65561	0	-0.961524	-0.274721	69.428344	88.777926	78.213226	5.346013	0.068352	76.63923	84.437107	0.907649	98.19894	27.49272	28.803	-3.89242	-0.00383	0.00882	27.49272	98.22559	28.79796	3.89865
Ba1Cd2Sb2	icsd_032021	Ba	Cd		0	0	1	122	trigonal	164	P-3m1 (164)	5.975113	33.664198	201.147373	5	0	5.6	35.302443	35.128485	35.215464	17.118154	15.52283	16.320492	0.518816	42.409899	0	-0.743294	-0.668965	0	-0.992278	0.124035	31.316186	55.167051	40.512513	6.729286	0.166104	46.168491	52.586871	0.877947	64.06816	22.56363	21.50592	2.55214	0.01694	0.01184	22.56363	65.93919	21.43698	-2.56918
Ba1Cl1F1	icsd_201514	Ba	Cl	F	0	0	1	111	tetragonal	129	P4/nmm (129)	4.364968	24.319041	106.151825	6	5.4477	9.833333	41.549421	41.547582	41.548501	18.824191	18.167212	18.495701	0.180859	48.31745	0	0	-1	0	-0.913812	0.406138	36.20531	52.197849	48.226398	3.185217	0.066047	36.20531	48.738335	0.742851	69.42148	22.17704	32.76488	0.00161	0.01549	0.00138	22.17704	69.44167	32.77418	-5.00E-05
Ba1Cl1N3	icsd_418423	N	Cl		0	0	1	113	monoclinic	11	P2_1/m (11)	3.492642	20.424878	71.336779	10	3.9429	10.4	33.98446	32.016603	33.000532	17.368996	15.81097	16.589983	0.554168	42.626846	-0.529999	0	-0.847998	-0.989949	0	0.141421	26.193421	65.91752	42.071408	6.980298	0.165915	31.77981	48.275896	0.658296	77.95155	24.31733	19.05243	0.00093	-4.65427	-0.00386	24.31733	51.3126	23.05697	0.01163
Ba1Co1S2	icsd_075227	Ba	Co	S	0	1	0	112	tetragonal	129	P4/nmm (129)	4.968206	21.757753	108.097004	8	0	8.5	60.378053	58.628591	59.503322	37.298494	30.941287	34.11989	1.057141	85.934411	-0.707107	0.707107	0	-0.707107	0	0.707107	60.055957	146.147442	80.900381	20.310199	0.251052	97.394566	119.758827	0.813256	118.9441	22.81205	52.68811	0.02886	-3.61796	0.00545	22.81205	103.581	23.06966	0.02183
Ba1Co1S2	icsd_075515	Ba	Co	S	0	0	1	112	tetragonal	129	P4/nmm (129)	4.968049	21.758442	108.097004	8	0	8.5	60.745829	58.8086	59.777215	37.543983	31.210581	34.377282	1.047565	86.542027	-0.497468	-0.497468	0.710669	0	-1	0	60.49166	142.972061	78.97148	18.005302	0.227998	97.75217	116.203051	0.841219	146.57436	27.89378	24.38332	-0.00208	0.01305	-1.69236	27.89378	150.86441	20.58189	-0.00091
Ba1Co1S2	icsd_082639	Ba	Co	S	0	0	1	112	tetragonal	129	P4/nmm (129)	4.968025	21.758545	108.097004	8	0	8.5	60.369931	58.624184	59.497057	37.281973	30.934336	34.108154	1.055764	85.908143	-0.707107	0	-0.707107	-0.707107	0.707107	0	60.152898	146.11465	80.882684	20.293053	0.250895	97.362786	119.698426	0.813401	118.85869	52.69978	22.84514	-0.02129	-0.00691	-3.42191	52.69978	123.67308	23.07299	-0.01701
Ba1Co2Ge2	icsd_420975	Ba	Co		0	0	1	122	tetragonal	139	I4/mmm (139)	6.7096	19.822391	133.000319	5	0	11.2	70.07035	62.66888	66.369615	42.341582	37.423271	39.882427	0.775224	99.680761	0	0	-1	-0.569803	0.683763	-0.455842	46.534417	118.126397	101.779724	18.235682	0.179168	46.534417	108.623229	0.428402	141.60342	43.77544	47.46231	0.31968	0.31744	0.42197	43.77544	141.94766	47.00809	0.3457
Ba1Cr2O4	icsd_064677	Ba			1	0	0	124	orthorhombic	59	Pmmn (59)	5.408757	13.390728	72.427198	28	0.9554	5.964286	118.127841	116.612805	117.370323	54.771291	35.133257	44.952274	2.807785	119.589428	-0.667124	0.741249	-0.074125	-1	0	0	51.311658	241.499055	101.788113	37.766434	0.37103	241.499055	173.484195	1.392052	269.35998	58.71352	64.19439	3.80877	0.96202	-0.84218	58.71352	186.33801	79.92384	3.04946
Ba1Cu1N1	icsd_086064	Ba			0	0	1	111	monoclinic	15	C2/c (15)	5.614732	21.183323	118.938692	18	0.1264	4	52.639496	52.369103	52.504299	21.193015	20.823125	21.00807	0.09398	55.607619	0	-1	0	-0.59588	-0.681005	0.425628	48.366397	62.198515	56.070846	3.207064	0.057197	52.735331	54.147077	0.973928	74.4851	38.13011	37.6118	-0.07448	0.291	0.00437	38.13011	77.73918	43.72684	-0.07718
Ba1Cu1P1	icsd_052684	Ba			0	0	1	111	hexagonal	194	P6_3/mmc (194)	5.355886	23.96059	128.33018	6	0	10	55.32734	55.259421	55.293381	37.385636	37.206238	37.295937	0.025338	91.349169	-0.336861	0.421076	-0.842152	0	-1	0	86.501565	96.993351	90.907275	3.466683	0.038134	88.161302	96.869276	0.910106	109.72017	29.09651	29.76758	0.15781	-0.12696	-0.04345	29.09651	109.89091	29.82982	0.15335
Ba1Cu1Sb1	icsd_057020	Ba			0	0	1	111	hexagonal	194	P6_3/mmc (194)	5.950533	30.011013	178.581536	6	0	10	42.494071	41.444754	41.969412	28.541959	28.091846	28.316902	0.105433	69.353114	0	0	-1	-0.496139	0.868243	0	56.790006	79.181793	69.218945	6.163098	0.089038	56.790006	78.200157	0.726213	88.55113	25.24426	22.31843	0.00208	0.01066	-0.42001	25.24426	89.91915	21.78005	0.00217
Ba1Cu1Sn2	icsd_058647	Sn			0	1	0	112	orthorhombic	63	Cmcm (63)	6.444785	28.232225	181.950631	8	0	10.75	44.104999	43.298826	43.701912	30.523583	29.582755	30.053169	0.177635	73.346419	-1	0	0	-0.092057	0.552345	-0.828517	57.625481	85.614867	74.329091	6.756958	0.090906	59.75158	70.498587	0.847557	68.55229	27.0858	21.32215	-0.05784	0.00893	-0.27473	27.0858	76.39324	31.06038	-0.04336
Ba1Cu2O2	icsd_009456	Ba			0	0	1	122	tetragonal	141	I4_1/amd (141)	5.782968	17.02286	98.442651	10	1.9701	4	69.645339	63.886995	66.766167	23.220883	21.338292	22.279588	0.531263	60.148347	-0.707107	0.707107	0	0	0	-1	45.169769	89.729936	56.709712	8.413948	0.148369	89.729936	54.894625	1.634585	95.42192	33.46085	57.08714	0.0062	0.01759	0.00037	33.46085	95.5924	57.17543	0.00995
Ba1Cu2P4	icsd_068802	Cu			0	1	0	124	orthorhombic	70	Fddd (70)	4.772131	19.302861	92.115791	14	0	7.285714	68.868061	68.803192	68.835627	39.296439	38.184831	38.740635	0.146499	97.862859	-0.613941	0	-0.789352	-0.957826	0.287348	0	84.426418	118.237075	96.880845	7.526085	0.077684	89.34747	93.652016	0.954037	135.39268	39.75741	37.26594	0.12846	-0.03311	-0.43866	39.75741	114.19635	48.7304	0.11657
Ba1Cu2S2	icsd_615832	Ba	Cu		0	0	1	122	tetragonal	139	I4/mmm (139)	5.563778	19.611435	109.113671	5	0.7432	11	62.057118	62.053603	62.055361	30.163163	27.132318	28.64774	0.558587	74.481766	-0.707107	-0.707107	0	-1	0	0	58.74406	106.448795	69.508168	9.308716	0.133923	79.083098	76.072453	1.039576	123.52894	20.23496	41.92192	-0.03711	0.01027	-0.00754	20.23496	123.4374	41.8639	-0.03894
Ba1Cu2Se2	icsd_089576	Ba	Cu		0	0	1	122	tetragonal	139	I4/mmm (139)	6.315296	22.209895	140.262058	5	0.5988	11.2	52.453671	52.446912	52.450292	23.147423	19.865611	21.506517	0.826132	56.761466	-0.615457	-0.615457	0.492366	0	-1	0	43.464808	87.768485	51.610098	8.368877	0.162156	62.786599	60.177256	1.043361	103.48436	16.39926	36.71912	0.04125	-0.01036	0.02253	16.39926	103.60014	36.73994	0.03181
Ba1Cu3O4	icsd_065881	Ba			0	0	1	134	orthorhombic	65	Cmmm (65)	5.244443	15.513305	81.358637	8	0	6.375	91.297419	57.476439	74.386929	36.845029	25.707217	31.276123	2.754713	82.294714	-0.512148	0.384111	-0.768221	0	-1	0	46.053687	179.81548	70.828339	27.14576	0.383261	61.355575	129.788896	0.472734	217.24907	99.49314	30.4748	-0.01512	0.02543	2.3563	99.49314	228.01639	25.06231	-0.01179
Ba1Cu3O4	icsd_083079	Ba			0	0	1	134	orthorhombic	65	Cmmm (65)	5.244201	15.514021	81.358637	8	0	6.5	91.255827	57.456188	74.356007	36.837648	25.705038	31.271343	2.753721	82.279477	-0.48795	0.39036	0.78072	-0.099504	-0.995037	0	46.063157	179.710199	70.817262	27.133686	0.383151	61.349231	129.754739	0.472809	217.25148	99.46368	30.49111	-0.02417	0.02651	2.27252	99.46368	227.83491	24.98353	-0.02175
Ba1Cu3O4	icsd_089232	Ba			0	0	1	134	orthorhombic	65	Cmmm (65)	5.245098	15.511368	81.358637	8	0	3.5	90.726829	52.761265	71.744047	33.977403	20.831573	27.404488	3.874838	72.927901	-0.544949	0.778499	0.3114	0	-0.847998	0.529999	37.005165	187.67114	58.861917	24.480785	0.415902	48.929377	67.855736	0.721079	220.16494	75.92443	48.24572	-29.52481	-2.43636	4.7361	75.92443	147.60576	61.50277	-54.34882
Ba1F1I1	icsd_001128	Ba	I	F	0	0	1	111	tetragonal	129	P4/nmm (129)	5.155479	30.408695	156.771396	6	4.0306	11.166667	26.20468	18.228758	22.216719	15.328608	9.893728	12.611168	3.184175	31.813864	0	0	-1	-0.631169	0.631169	-0.450835	7.963045	46.295065	32.988326	10.479604	0.317676	7.963045	33.887294	0.234986	51.83368	18.79346	19.07928	-0.00596	0.00231	0.00323	18.79346	51.83381	19.07903	-0.00518
Ba1F4Mg1	icsd_182597	F			0	1	0	114	orthorhombic	36	Ccm2_1 (36)	4.32152	15.217894	65.764424	12	6.836	7.583333	61.712944	56.00295	58.857947	32.183355	28.574572	30.378963	0.733426	77.758747	0	-0.668965	-0.743294	-0.759257	0	0.650791	54.712963	123.379996	77.039941	16.376978	0.212578	65.602186	96.911424	0.676929	126.33056	34.56198	63.62535	-0.05829	-0.00469	-0.04033	34.56198	77.32579	29.48871	-0.06341
Ba1F4Zn1	icsd_182607	F			0	1	0	114	orthorhombic	36	Ccm2_1 (36)	4.888257	15.779078	77.132196	12	4.5451	7.333333	61.361949	55.263784	58.312867	25.755919	22.813528	24.284724	0.755225	63.973467	0	0	-1	-0.8	0	0.6	43.365303	98.520046	63.889366	13.358401	0.209086	52.663146	75.7985	0.694778	123.00635	41.77957	61.42825	0.01096	-0.05563	0.04204	41.77957	71.90751	36.36228	0.02981
Ba1Fe2P2	icsd_169745	Ba			0	0	1	122	tetragonal	139	I4/mmm (139)	5.773627	17.88715	103.27373	5	0	11.2	93.886888	87.100215	90.493551	59.289635	52.941816	56.115725	0.677427	139.510093	0	0	-1	-0.707107	-0.707107	0	83.73753	190.535041	139.126662	27.340474	0.196515	83.73753	176.353906	0.474827	196.46881	56.42048	57.68427	-1.80726	3.79339	1.06864	56.42048	197.02255	56.78478	3.15735
Ba1Ga1Ge1	icsd_615870	Ba			0	0	1	111	hexagonal	194	P6_3/mmc (194)	5.382068	28.764412	154.812031	12	0	9.583333	40.186206	39.294423	39.740314	29.935651	28.980781	29.458216	0.187437	70.864733	0	0	-1	-0.240772	0.842701	-0.481543	48.187433	76.833614	71.743919	6.387026	0.089025	48.187433	73.019443	0.659926	83.98511	20.64899	23.20483	0.00613	0.00643	-0.06899	20.64899	84.17639	23.58347	0.00501
Ba1Ga2Sb2	icsd_280662	Sb			1	0	0	122	orthorhombic	62	Pnma (62)	5.685008	30.394565	172.793341	40	0.2137	7.275	36.21194	34.803573	35.507757	24.065036	21.925391	22.995214	0.528404	56.737663	0	0	-1	0	-0.759257	0.650791	45.113689	84.055461	56.499894	9.658678	0.17095	48.305993	67.687574	0.713661	54.96173	18.27318	17.85186	-0.02065	0.00417	0.17201	18.27318	76.18654	31.23404	0.00827
Ba1Ge1Mg1	icsd_042460	Ba	Mg	Ge	0	0	1	111	tetragonal	129	P4/nmm (129)	4.417023	29.357459	129.672581	6	0	10	32.800016	32.067381	32.433699	24.305901	22.14295	23.224426	0.511253	56.247723	0	0	-1	-0.707107	-0.707107	0	35.968525	67.116399	55.830346	8.189237	0.146681	35.968525	65.866343	0.546084	73.36801	10.53523	20.39968	0.01045	-0.02814	0.00372	10.53523	73.32436	20.37868	0.01258
Ba1Ge1Ni2	icsd_421431	Ba			0	0	1	112	orthorhombic	59	Pmmn (59)	6.516113	20.855365	135.89592	8	0	8.25	60.011388	57.538526	58.774957	26.896569	15.767493	21.332031	3.572098	57.089344	-0.707107	0	-0.707107	0	-1	0	26.646179	139.323362	47.662952	22.723562	0.476755	57.206318	98.835277	0.578805	97.66911	32.18029	44.99255	0.48231	-0.12154	-0.1086	32.18029	152.90374	28.01199	0.21176
Ba1Ge1Zn1	icsd_106310	Ba			0	0	1	111	hexagonal	194	P6_3/mmc (194)	5.366823	28.398204	152.408124	6	0	10	40.558879	39.922335	40.240607	23.070021	21.700583	22.385302	0.331475	56.651151	-0.099504	0.995037	0	0	-0.371391	-0.928477	48.350804	62.914338	55.607323	3.924584	0.070577	62.400749	50.114705	1.245158	73.62503	38.24688	17.32211	0.01592	-0.00282	-0.1297	38.24688	70.26102	20.46113	0.02396
Ba1Ge2Mg2	icsd_025312	Ba	Mg		0	0	1	122	tetragonal	139	I4/mmm (139)	4.352213	25.274438	109.999735	5	0	11.6	43.258609	42.612835	42.935722	32.440893	30.233237	31.337065	0.380259	75.61506	0	0	-1	-0.57735	-0.57735	-0.57735	53.607588	89.222165	76.928209	7.637787	0.099285	53.607588	69.289995	0.77367	79.07925	31.77609	25.52033	-1.02896	1.31634	-0.2068	31.77609	79.13918	25.55459	1.31917
Ba1Ge2Mn2	icsd_080503	Ba	Mn		0	0	1	122	tetragonal	139	I4/mmm (139)	5.939021	21.947501	130.346678	5	0	11.4	57.690559	49.636523	53.663541	41.848913	33.973463	37.911188	1.321319	92.055659	-0.394055	-0.472866	-0.78811	-0.099504	0.995037	0	60.54302	166.343426	84.823416	23.32051	0.27493	69.675664	129.711373	0.537159	171.4006	15.21316	18.22964	0.02512	0.30646	-4.85387	15.21316	171.49801	18.0944	-0.16716
Ba1Ge2Rh2	icsd_077146	Ba	Rh		0	0	1	122	tetragonal	139	I4/mmm (139)	7.508471	21.603255	162.207406	5	0	11.6	73.970773	56.470934	65.220854	43.765722	37.832467	40.799095	1.09404	101.278856	0	0	-1	-0.652929	-0.725476	-0.217643	44.285715	141.036602	103.923089	25.145649	0.241964	44.285715	127.66692	0.346885	153.73857	64.53576	42.28247	-0.98257	1.94042	-1.04414	64.53576	154.4635	41.73327	1.74998
Ba1Hf1N2	icsd_184053	Ba	Hf		0	0	1	112	tetragonal	129	P4/nmm (129)	7.617811	18.737133	142.735928	8	1.4865	5	105.124664	100.692135	102.9084	46.765657	36.371894	41.568775	1.472838	109.907644	-1	0	0	-0.707107	0.707107	0	72.468496	199.661485	106.421257	27.91296	0.262287	96.264456	129.985386	0.740579	157.26732	113.20201	68.51065	-0.00793	0.02614	-0.00031	113.20201	158.29924	68.1908	0.00728
Ba1In2P2	icsd_260564	Ba	In		1	0	1	122	monoclinic	11	P2_1/m (11)	5.014062	28.409005	142.444512	20	0.306	5.05	40.593071	37.433339	39.013205	27.154947	23.712872	25.433909	0.810192	62.680592	-0.752577	0	-0.658505	-0.6	0.8	0	40.310431	93.993943	60.911915	12.699738	0.208493	40.43623	66.516908	0.607909	68.12524	32.69434	22.30679	-0.00559	-7.74899	-0.01262	32.69434	89.77142	12.11053	-0.00706
Ba1Li1P1	icsd_056444	Ba			0	0	1	111	hexagonal	187	P-6m2 (187)	3.775019	25.694857	96.998581	3	0.6983	10	37.969438	37.954274	37.961856	25.616941	23.629613	24.623277	0.420916	60.737692	-0.256307	0.683486	-0.683486	0	0	-1	50.209754	82.070453	57.80486	7.462702	0.129102	82.070453	71.144753	1.15357	78.97833	23.24666	12.97779	-0.00185	-0.00113	0.00212	23.24666	78.9801	12.97622	-0.00167
Ba1Li1P1	icsd_416890	Ba			0	0	1	111	hexagonal	194	P6_3/mmc (194)	3.739059	25.941978	96.998581	6	0.9618	10	39.653203	39.463732	39.558468	29.544366	29.129571	29.336968	0.075999	70.566599	0	0	-1	-0.362143	-0.814822	-0.452679	55.666415	73.991434	71.083528	4.002031	0.0563	55.666415	72.354392	0.769358	81.66868	18.15993	22.78833	0.00016	-0.0005	0.00057	18.15993	81.65367	22.79326	0.0003
Ba1Li1Sb1	icsd_280574	Ba			0	0	1	111	hexagonal	194	P6_3/mmc (194)	4.5375	32.451777	147.249937	6	0.6922	9.833333	30.519804	29.894809	30.207307	23.857479	22.781766	23.319623	0.256997	55.640873	0	0	-1	-0.884652	-0.147442	-0.442326	35.967786	60.781446	56.288957	5.82681	0.103516	35.967786	58.505529	0.614776	66.38521	12.44725	18.16367	-0.00026	0.0003	0.00118	12.44725	66.39652	18.16774	-7.00E-05
Ba1Li1Si1	icsd_042890	Ba			0	0	1	111	hexagonal	187	P-6m2 (187)	3.422413	27.875034	95.39989	3	0	10	30.326473	23.963718	27.145096	17.870352	15.384989	16.627671	1.07324	41.424789	0	0	-1	-0.618853	-0.721995	-0.309426	17.488584	51.080421	42.367211	9.569856	0.225879	17.488584	50.006717	0.349725	64.81467	21.78297	18.58065	-0.00332	-0.00069	0.00112	21.78297	64.77356	18.57965	-0.00109
Ba1Li2Si1	icsd_015642	Ba	Li		0	0	1	112	orthorhombic	59	Pmmn (59)	2.994599	24.855201	74.431368	8	0	11	27.910272	27.079216	27.494744	17.845059	14.823525	16.334292	1.049858	40.902904	-0.351123	0	0.936329	-1	0	0	25.747856	62.702786	39.874659	7.818457	0.196076	26.055079	46.262737	0.563198	67.53108	14.26607	4.14638	-0.00093	0.00101	-0.0019	14.26607	48.4957	27.95461	0.00662
Ba1Mg1Si1	icsd_042459	Ba	Mg	Si	0	0	1	111	tetragonal	129	P4/nmm (129)	3.673656	28.584902	105.011089	6	0	9.833333	34.813013	34.107886	34.46045	25.669196	23.2853	24.477248	0.532562	59.373972	0	0	-1	-0.707107	-0.707107	0	37.719055	70.429028	58.855911	8.602088	0.146155	37.719055	69.240316	0.544756	77.65222	10.64599	22.00712	-0.00157	0.00754	0.00121	10.64599	77.65384	22.0078	0.00241
Ba1Mg2P2	icsd_030914	Ba	Mg		0	0	1	122	trigonal	164	P-3m1 (164)	3.243666	25.380042	82.324373	5	1.1282	5.6	51.314817	51.297205	51.306011	38.396768	37.365389	37.881079	0.138356	91.19825	0	-0.948683	0.316228	0	-0.780869	-0.624695	79.757557	105.902773	91.293405	7.053569	0.077263	90.627305	84.699927	1.069981	97.78747	27.58746	27.16534	-6.03487	0.01208	-0.00371	27.58746	97.79691	27.17103	6.03988
Ba1Mg2Sb2	icsd_100047	Ba	Mg		0	0	1	122	trigonal	164	P-3m1 (164)	4.313324	33.066375	142.626001	5	0.8398	5.6	36.304988	36.274826	36.289907	24.913933	23.512084	24.213009	0.298944	59.423116	0	-0.874157	0.485643	0	-0.857493	-0.514496	48.335001	74.104136	58.887985	6.707609	0.113905	56.266432	57.4087	0.980103	69.49207	20.57572	20.30008	-6.59352	0.0008	-0.00042	20.57572	69.49293	20.29641	6.60049
Ba1Mg2Si2	icsd_025311	Ba	Mg		0	0	1	122	tetragonal	139	I4/mmm (139)	3.348081	24.015534	80.405945	5	0	11.6	49.406251	49.359301	49.382776	41.911557	40.525763	41.21866	0.171928	96.740339	0	0	-1	-0.271607	0.724286	0.63375	76.625734	107.249151	97.968168	6.798925	0.069399	76.625734	88.794015	0.862961	99.02731	23.74575	27.53463	-1.25089	0.88047	-0.16871	23.74575	99.02751	27.53252	0.87705
Ba1Mn1S2	icsd_615969	Ba	Mn		0	0	1	112	orthorhombic	62	Pnma (62)	4.609414	23.091544	106.438479	16	0	5.3125	58.136757	55.840477	56.988617	31.869558	27.79995	29.834754	0.773067	76.205808	-0.707107	0.707107	0	0	-0.743294	-0.668965	51.979838	117.152671	73.634495	15.614344	0.212052	78.398053	62.443554	1.255503	85.26394	23.47555	41.49643	0.00352	-0.01506	-1.39771	23.47555	105.04075	46.06457	0.00108
Ba1Mn1Sb2	icsd_100024	Ba	Mn	Sb	0	0	1	112	tetragonal	139	I4/mmm (139)	6.286819	28.775997	180.909492	8	0	10	48.51076	47.672818	48.091789	28.581674	26.505856	27.543765	0.409154	69.384942	0	-0.099504	0.995037	-0.737309	-0.655386	0.163846	52.821569	99.589537	69.790503	9.616773	0.137795	52.84843	76.121002	0.694269	87.50096	35.15727	29.41043	-3.80089	-2.13128	3.67909	35.15727	80.65327	34.42058	1.59382
Ba1Mn2Sb2	icsd_032019	Ba	Mn		0	0	1	122	tetragonal	139	I4/mmm (139)	6.781652	24.031452	162.972944	5	0	8	58.524836	58.208305	58.36657	27.596363	22.226465	24.911414	1.213434	65.426082	-0.995037	0	0.099504	-0.539164	0.539164	0.646997	37.961147	110.17623	66.002839	13.778032	0.208749	47.010706	51.805791	0.907441	76.50689	48.71739	47.79588	2.68976	3.7631	4.09126	48.71739	78.28525	47.66564	-4.32652
Ba1Mn2Sn2	icsd_058661	Ba	Mn		0	0	1	122	tetragonal	139	I4/mmm (139)	6.376881	25.239156	160.947087	5	0	11.6	43.521536	39.593472	41.557504	31.038793	26.407849	28.723321	0.976022	70.034665	-0.444444	-0.444444	-0.777778	-0.099504	0.995037	0	47.885097	116.999822	65.318276	14.360849	0.21986	54.462382	86.869197	0.626947	121.16336	5.3782	19.64979	0.05137	0.37345	-6.34905	5.3782	122.304	18.84998	-0.2008
Ba1N2Zr1	icsd_074904	Ba	Zr		0	0	1	112	tetragonal	129	P4/nmm (129)	5.557737	19.164057	106.508784	8	1.3959	5	100.583681	97.721803	99.152742	43.713853	33.553033	38.633443	1.543429	102.577687	-1	0	0	-0.707107	0.707107	0	61.798743	184.47042	99.788937	25.964213	0.260191	95.961681	116.083949	0.826658	145.24848	108.40535	66.70886	-0.0054	0.0269	-0.00049	108.40535	146.11166	66.4131	0.00748
Ba1Nb2O6	icsd_039272	O			0	0	1	126	monoclinic	14	P2_1/c (14)	5.254888	14.716286	77.332428	18	2.5574	8.444444	123.856701	104.598702	114.227702	66.462145	51.356485	58.909315	1.65478	150.803844	0	0	-1	-1	0	0	75.056378	318.544754	146.805343	43.723871	0.297836	75.056378	191.222951	0.392507	364.34866	90.1298	38.90065	-0.04809	0.62718	0.00041	90.1298	180.66046	93.82842	-0.03126
Ba1Ni1S2	icsd_246945	Ba	Ni	S	0	0	1	112	tetragonal	129	P4/nmm (129)	4.906701	22.010196	107.997457	8	0	8.375	60.434043	57.830705	59.132374	32.676	26.426549	29.551275	1.227435	75.994468	0	-0.743294	0.668965	-0.668965	0.743294	0	52.520234	132.945173	71.203027	18.614013	0.261422	91.573387	103.29173	0.886551	108.0431	64.9468	25.4918	0.00304	0.0006	0.05899	64.9468	118.01112	19.57403	0.00564
Ba1Ni1Sn3	icsd_058662	Ba			0	0	1	113	tetragonal	107	I4mm (107)	6.998074	26.203414	183.373431	5	0	11.8	55.568392	55.484559	55.526476	30.974729	29.793478	30.384103	0.199751	77.090919	0	-0.993884	0.110432	-0.743294	0.668965	0	60.436388	86.051613	77.654923	5.983712	0.077055	85.135546	74.270067	1.146297	90.88288	48.10854	30.95871	-0.9714	1.23865	-0.31325	48.10854	88.9872	31.3975	1.27981
Ba1Ni2P2	icsd_085408	Ba			0	0	1	122	tetragonal	139	I4/mmm (139)	5.643487	18.634875	105.165682	5	0	11.2	78.630757	75.715104	77.17293	47.722762	43.54271	45.632736	0.518503	114.358047	0	0	-1	-1	0	0	81.52276	161.41127	110.115852	15.793898	0.14343	81.52276	128.729451	0.633288	183.92766	22.61744	48.3071	0.23704	0.08562	1.4943	22.61744	182.46594	47.73668	0.1554
Ba1Ni2Si2	icsd_014110	Ba	Ni		0	0	1	122	orthorhombic	63	Cmcm (63)	5.180614	19.92954	103.247253	10	0	10.2	68.487083	59.647981	64.067532	46.086428	31.359823	38.723126	2.496193	96.689341	-0.668965	0	-0.743294	-0.768221	0.640184	0	41.181334	179.006664	88.734565	33.982066	0.382963	83.923239	156.282027	0.536999	170.97285	61.36171	10.26768	-0.00844	-0.10822	-0.41386	61.36171	150.30449	30.78979	-0.00897
Ba1Ni4O8	icsd_020898	Ba			0	0	1	148	trigonal	166	R-3m (166)	4.639709	13.767913	63.879113	13	0	6	86.686689	78.111065	82.398877	33.935173	22.367048	28.151111	2.695763	75.818959	-0.616316	-0.35218	0.704361	-0.83205	0.5547	0	40.867857	122.544924	64.433645	24.972549	0.38757	109.406757	121.918016	0.89738	174.98431	94.01166	31.44662	2.16478	-0.08693	-0.20678	94.01166	174.52831	31.48773	-2.37792
Ba1O5Si2	icsd_010162	Ba			0	0	1	125	orthorhombic	62	Pcmn (62)	3.591321	15.807175	56.768632	32	4.7364	7.09375	53.933027	52.600918	53.266973	33.90125	32.325803	33.113527	0.269007	82.288892	-0.993884	-0.110432	0	0	-1	0	69.855019	121.081006	80.650806	8.179877	0.101423	76.519628	85.099651	0.899177	83.98534	17.94452	36.60291	0.00029	0.0092	-0.0403	17.94452	131.96455	31.71266	0.00259
Ba1O5Ti2	icsd_162369	Ba			1	0	0	125	orthorhombic	62	Pnma (62)	4.500685	14.437939	64.980619	32	3.0322	7.25	110.470273	102.238653	106.354463	55.355184	51.241742	53.298463	0.48189	137.008569	-1	0	0	-0.17609	0.880451	0.440225	85.714238	173.983329	139.561695	22.467932	0.160989	85.714238	148.503517	0.577187	126.25932	76.96955	72.64373	0.00612	0.01651	0.0098	76.96955	232.22765	89.67716	0.00755
Ba1O6Sb2	icsd_074541	Ba			0	0	1	126	trigonal	162	P-31m (162)	5.347793	16.451583	87.979662	9	2.8215	4.555556	94.078981	80.35859	87.218786	44.310345	37.389616	40.84998	1.096228	106.000989	-0.35218	-0.616316	-0.704361	-0.976187	0	-0.21693	68.80915	158.049644	100.411364	24.740498	0.246391	87.208543	136.097429	0.64078	194.36313	89.22954	44.56387	-0.03499	13.26248	-0.00656	89.22954	194.43398	44.55816	-0.01982
Ba1O8V3	icsd_080299	Ba			0	0	1	138	monoclinic	4	P2_1 (4)	4.088133	14.153748	57.862401	24	0	6.166667	68.602407	59.383633	63.99302	34.203648	24.621208	29.412428	2.101214	76.514734	-0.147043	0.661693	0.735215	-0.445435	-0.890871	-0.089087	37.856201	131.47981	69.233914	24.986273	0.360896	74.184262	117.915879	0.629129	132.00575	59.55109	21.82223	-0.03027	3.32781	-0.0212	59.55109	165.29009	36.8586	-0.04802
Ba1O8V3	icsd_082063	Ba			0	0	1	138	monoclinic	11	P2_1/m (11)	4.088082	14.153925	57.862401	24	0	6.166667	68.73699	59.49272	64.114855	34.216252	24.682337	29.449295	2.086708	76.617248	-0.147043	0.661693	0.735215	-0.445435	0.890871	-0.089087	38.108189	131.543313	69.348825	24.958021	0.359891	74.180973	118.123618	0.627994	132.25001	59.70426	21.95592	-0.0431	3.20552	-0.04187	59.70426	165.42911	36.94688	-0.05164
Ba1O9V4	icsd_173000	Ba			1	0	0	149	monoclinic	13	P2/c (13)	4.655455	12.358877	57.536198	28	0.405	7.75	94.414494	70.355226	82.38486	54.438783	43.980934	49.209858	1.530876	123.11641	-0.919145	0	-0.393919	-0.268328	-0.894427	0.357771	63.022866	203.187595	123.361189	42.496953	0.344492	72.264054	143.116451	0.504932	103.60236	55.61466	58.59279	0.04194	-26.27434	0.10592	55.61466	235.40301	58.20601	0.01042
Ba1P2Pd2	icsd_036375	Ba			0	0	1	122	tetragonal	123	P4/mmm (123)	6.368557	21.490965	136.86643	5	0	12	49.408321	48.105103	48.756712	31.492267	25.843378	28.667822	1.119999	71.909716	-0.57735	-0.57735	-0.57735	0	-1	0	53.105963	124.114356	64.305733	12.861514	0.200006	75.459855	79.940821	0.943946	129.71505	9.19791	21.22151	-0.0022	0.01007	-0.01607	9.19791	129.72297	21.22644	-0.00399
Ba1P2Rh2	icsd_050188	Ba	Rh		0	0	1	122	tetragonal	139	I4/mmm (139)	6.733063	19.980809	134.532045	5	0	11.2	93.771048	84.788395	89.279721	44.032319	42.098075	43.065197	0.335673	111.299947	-0.162221	0.162221	0.973329	-0.287348	0.957826	0	85.546717	145.716829	109.561501	16.314642	0.148909	85.928084	136.326409	0.630311	184.4422	78.34869	52.51093	0.3643	-2.14576	-5.56632	78.34869	185.80106	52.40996	-1.17205
Ba1P2Ru2	icsd_616013	Ba	Ru		0	0	1	122	tetragonal	139	I4/mmm (139)	6.646244	20.058379	133.312877	5	0	11.2	98.356071	84.059024	91.207547	55.256423	42.66606	48.961241	1.645538	124.589958	-0.444444	-0.111111	0.888889	-0.707107	-0.707107	0	78.610596	229.919904	118.721831	39.474463	0.332495	82.157404	191.857923	0.42822	201.3653	87.80614	50.4678	0.64644	-0.03829	0.42191	87.80614	198.46705	53.84273	0.01988
Ba1P2Zn2	icsd_012145	Ba	Zn		0	0	1	122	tetragonal	139	I4/mmm (139)	5.037957	21.756245	109.607025	5	0	11	55.569362	55.007011	55.288187	30.887483	26.137805	28.512644	0.918807	72.990615	-0.523205	-0.523205	-0.672692	0	-1	0	53.914781	118.513465	66.307723	12.804469	0.193107	83.012403	89.330387	0.929274	127.88482	18.25485	28.43766	-0.00357	0.02889	0.01587	18.25485	127.89293	28.44035	-4.00E-05
Ba1Pd1Sb2	icsd_405111	Sb			0	1	0	112	orthorhombic	63	Ccmm (63)	6.982597	28.969368	202.281438	8	0	11.5	54.729956	53.65904	54.194498	23.657975	21.355236	22.506606	0.559109	59.309535	-0.828517	0.092057	-0.552345	0	0	-1	43.932032	89.129654	57.448689	8.334426	0.145076	49.834409	54.961429	0.906716	74.79069	46.43666	26.28196	0.12582	-0.21051	1.56361	46.43666	84.51572	39.75772	0.38448
Ba1Pd1Sn3	icsd_058673	Ba			0	0	1	113	tetragonal	107	I4mm (107)	7.121076	27.976644	199.223805	5	0	12	54.59125	54.589212	54.590231	28.593076	28.536125	28.564601	0.010016	72.967021	-0.099015	-0.099015	-0.990148	-0.874157	0.485643	0	70.031186	75.650828	72.885808	1.438195	0.019732	70.062908	74.558791	0.9397	94.14749	33.75154	36.25226	0.15205	0.15976	-0.41154	33.75154	94.01376	36.24828	0.11902
Ba1Pd2S4	icsd_079930	Ba			1	0	0	124	monoclinic	11	P2_1/m (11)	4.914484	23.093444	113.49237	14	1.0623	6.785714	46.628017	43.230402	44.929209	19.512818	17.589073	18.550946	0.625451	48.91994	-0.993884	0	-0.110432	-0.503509	-0.755263	0.419591	34.394605	68.115093	48.563149	9.260686	0.190694	34.887841	46.215105	0.754901	62.95543	36.89852	37.94298	0.00614	-8.41808	-0.01668	36.89852	84.92065	27.97542	-0.0038
Ba1Pd2Sb2	icsd_061197	Ba	Pd		0	0	1	122	tetragonal	139	I4/mmm (139)	7.754611	25.425913	197.168058	5	0	12.4	64.309396	64.048008	64.178702	28.507745	23.74295	26.125347	1.007494	69.011789	-0.715542	0.536656	-0.447214	-0.9759	0.09759	0.19518	39.591469	96.723013	65.730667	15.62551	0.23772	66.204285	60.398574	1.096123	120.75766	38.85535	43.0873	5.34422	-0.36394	1.04295	38.85535	102.13858	48.43983	-3.97494
Ba1Pt1Sb1	icsd_059186	Ba			0	0	1	111	hexagonal	187	P-6m2 (187)	8.31341	30.239039	251.38952	3	0	10	60.657669	53.598916	57.128293	19.396753	12.602564	15.999659	2.827254	43.900628	-0.406138	0.913812	0	0	0	-1	22.735913	67.564375	37.526537	10.092269	0.268937	67.564375	27.103079	2.492867	101.41372	84.94798	25.30893	-0.00547	0.19045	-1.34475	84.94798	99.83358	24.89899	0.00605
Ba1Pt1Sn3	icsd_058677	Ba			0	0	1	113	tetragonal	107	I4mm (107)	8.227897	27.79201	228.669807	5	0	12	60.578687	60.569273	60.57398	26.747616	24.008694	25.378155	0.570557	66.804908	-0.497468	0.497468	0.710669	0	-1	0	43.035273	85.12776	63.643164	10.817251	0.169967	74.944852	77.692133	0.964639	105.48287	34.19819	41.52421	0.35885	0.12055	-0.81163	34.19819	105.67145	41.49158	0.07712
Ba1S4Y2	icsd_616101	Y			0	0	1	124	orthorhombic	62	Pnma (62)	3.921888	26.819471	105.182962	28	1.9863	5.642857	58.188779	57.246921	57.71785	31.015209	30.516445	30.765827	0.098173	78.37233	-0.8	0	0.6	0	-0.894427	0.447214	68.942858	91.459146	77.841942	6.42016	0.082477	80.760208	77.577555	1.041025	87.82494	32.26517	35.63331	-0.00429	0.00334	0.00518	32.26517	112.13866	42.15017	-0.00382
Ba1Sc2Te4	icsd_416326	Sc			0	0	1	124	orthorhombic	62	Pnma (62)	5.237194	33.411507	174.982553	28	0.6877	5.464286	41.844084	41.758352	41.801218	22.489161	22.128823	22.308992	0.083471	56.819017	-0.613941	0	-0.789352	0	-0.743294	0.668965	51.097245	65.613002	56.75852	3.395127	0.059817	53.317025	55.651866	0.958046	70.62642	23.39656	27.78031	0.00098	-0.0076	0.00133	23.39656	71.02417	30.56726	-0.002
Ba1Se4Y2	icsd_616134	Y			0	0	1	124	orthorhombic	62	Pnma (62)	4.93054	30.35786	149.680657	28	1.615	5.642857	48.912546	48.300928	48.606737	25.624583	25.150037	25.38731	0.107006	64.868346	-0.768221	0	-0.640184	0	-0.8	0.6	56.322329	75.933412	64.381757	5.409687	0.084025	67.046435	64.126544	1.045533	74.80844	27.34867	30.67139	-0.00043	-0.00718	-0.0003	27.34867	91.10903	35.63895	-0.00314
Ba1Si1Zn1	icsd_106316	Ba			0	0	1	111	hexagonal	194	P6_3/mmc (194)	4.661103	27.406953	127.746632	6	0	10	44.42902	43.48569	43.957355	24.390158	23.594514	23.992336	0.190301	60.897527	0	0	-1	-0.819232	0	0.573462	46.326338	66.982086	61.212766	4.139346	0.067622	46.326338	57.212291	0.809727	80.29183	33.3544	28.65109	0.00932	-0.04177	-0.01733	33.3544	77.18429	28.68747	0.00747
Ba1Si2Zn2	icsd_174269	Ba	Zn		0	0	1	122	tetragonal	139	I4/mmm (139)	5.142497	20.940915	107.688597	5	0	12.4	60.696337	60.609419	60.652878	44.680908	41.423425	43.052166	0.394627	104.444498	-0.995037	0	0.099504	-0.514496	-0.514496	-0.685994	76.634333	126.041058	106.477235	12.19194	0.114503	90.779052	91.263255	0.994694	100.71927	40.28683	38.1499	-6.14711	3.97081	-0.38668	40.28683	100.77937	38.18359	3.9488
Ba1Sn1Zn1	icsd_106317	Ba			0	0	1	111	hexagonal	194	P6_3/mmc (194)	5.488242	32.416295	177.908465	6	0	9.833333	36.304938	34.672106	35.488522	22.966939	22.431988	22.699463	0.166332	56.130778	0	0	-1	-1	0	0	48.258691	68.626621	55.07734	3.72525	0.067637	48.258691	58.109151	0.830483	79.1667	25.43948	15.90553	-0.00538	0.00514	0.04696	25.43948	75.91886	17.60513	-0.00408
Ba1Te4Y2	icsd_090335	Y			0	0	1	124	orthorhombic	62	Pnma (62)	5.267482	37.177943	195.834147	28	1.0325	5.678571	37.803474	37.575668	37.689571	18.917023	18.518418	18.71772	0.113687	48.177687	-0.707107	0	-0.707107	0	-0.743294	0.668965	41.279291	56.77894	47.794757	3.87852	0.081149	49.315261	47.682441	1.034244	59.43052	22.12867	24.72996	0.00058	0.0063	-0.00351	22.12867	65.64437	27.87999	0.00185
Ba2Bi4Cd3	icsd_058636	Ba			0	1	0	234	orthorhombic	64	Ccme (64)	8.08106	33.055927	267.126925	18	0	10.555556	35.083842	35.03995	35.061896	15.193205	13.292647	14.242926	0.716144	37.632991	-0.707107	0	-0.707107	-1	0	0	26.438116	54.797959	35.0315	6.485803	0.185142	46.464723	35.449989	1.310712	64.57705	19.58673	21.14062	0.00725	-0.00152	0.0127	19.58673	58.3913	24.59336	-0.00778
Ba2Br1N1	icsd_262140	Ba	Br	N	0	0	1	112	trigonal	166	R-3m (166)	5.046235	30.320424	153.003995	4	1.1386	6	37.794306	37.679671	37.736989	18.815967	16.659666	17.737817	0.650205	46.005361	-0.762493	-0.457496	0.457496	0	-0.83205	0.5547	32.021278	59.402473	44.600342	7.892599	0.176963	59.306396	41.3387	1.434646	60.01626	27.07787	23.50639	6.10106	0.01491	-0.0068	27.07787	59.99092	23.49199	-6.12481
Ba2Cl1F3	icsd_183926	Cl	F		0	0	1	123	trigonal	164	P-3m1 (164)	4.659144	21.806133	101.597909	6	5.7253	12.333333	44.2094	38.167989	41.188694	14.985198	9.422426	12.203812	3.110163	33.320581	-0.786334	0.436852	0.436852	0	-0.768221	-0.640184	16.801656	47.510073	28.473157	8.777954	0.308289	44.366847	22.311817	1.988491	75.43253	59.32776	19.53004	-5.60709	-0.01908	0.04935	59.32776	75.60659	19.54999	5.62732
Ba2Cl1N1	icsd_262051	Ba	N	Cl	0	0	1	112	trigonal	166	R-3m (166)	4.687153	28.706302	134.550842	4	1.1129	5.75	40.045744	40.005921	40.025833	20.227549	18.300069	19.263809	0.527627	49.801814	-0.755263	-0.419591	0.503509	0	-0.857493	0.514496	35.7588	63.497509	48.451623	7.623886	0.15735	59.79707	46.764199	1.278693	65.57315	27.8278	25.09636	6.35091	0.04175	-0.01851	27.8278	65.53744	25.08603	-6.36356
Ba2Cl1P1	icsd_028134	P	Cl		0	0	1	112	trigonal	166	R-3m (166)	3.892448	36.376714	141.594458	4	1.259	6	27.366646	26.54734	26.956993	15.805949	15.085246	15.445598	0.269739	38.906095	0	0	-1	-0.811107	0.486664	0.324443	28.931335	47.489983	38.771425	4.769662	0.12302	28.931335	43.511894	0.664906	53.78196	17.01116	16.92008	2.6211	-0.01925	-0.00373	17.01116	53.80139	16.91827	-2.62543
Ba2Co1F6	icsd_021057	F			0	0	1	126	tetragonal	139	I4/mmm (139)	5.377026	15.357931	82.579998	9	0	7.555556	64.22523	63.127373	63.676302	23.459674	14.071154	18.765414	3.353479	51.260727	0	-1	0	-0.457496	-0.457496	-0.762493	17.588171	72.066372	50.864045	16.773945	0.32978	70.348151	38.662266	1.819556	85.61833	76.13894	40.89264	0.02593	0.02967	-0.00081	76.13894	85.58161	40.87373	0.02598
Ba2F1N1	icsd_262049	N	F		0	0	1	112	trigonal	166	R-3m (166)	5.329469	23.96486	127.719968	4	1.0943	6	46.776724	46.10077	46.438747	24.115425	22.967433	23.541429	0.26458	60.415393	-0.597614	0.358569	-0.717137	-0.86164	-0.492366	-0.123091	48.968469	73.73352	59.057793	7.439642	0.125972	57.224493	71.723609	0.797847	88.58915	30.93214	27.94467	2.84702	-0.02599	0.01312	30.93214	88.48634	27.93443	-2.85743
Ba2Ge4Ni5	icsd_423268	Ba	Ge		0	0	1	245	monoclinic	12	C2/m (12)	6.634834	19.53701	129.624827	11	0	11.909091	64.85615	64.234208	64.545179	29.78782	20.695238	25.241529	2.206464	66.991811	-0.616316	-0.704361	-0.35218	-0.199007	0.895533	0.398015	29.804181	107.654264	59.268786	18.434742	0.311036	60.683794	56.750576	1.069307	125.11519	26.02004	43.06739	2.81942	-0.00212	1.66063	26.02004	132.97975	48.39792	-0.26999
Ba2Hf1S4	icsd_080652	Ba	S		0	0	1	124	tetragonal	139	I4/mmm (139)	4.850335	28.435266	137.920556	7	1.1672	6.714286	56.513526	56.502824	56.508175	31.207471	28.122929	29.6652	0.548593	75.741542	-0.556022	-0.556022	0.617802	-1	0	0	60.159457	108.504026	70.40288	9.814267	0.139401	95.001233	84.10617	1.129539	118.55268	22.28673	29.82819	0.00063	0.00485	-0.00317	22.28673	118.55143	29.82636	-0.00094
Ba2O4Sn1	icsd_027115	Ba	O		0	0	1	124	tetragonal	139	I4/mmm (139)	6.336754	17.121579	108.495239	7	2.4384	8	96.752033	96.363807	96.55792	52.826912	51.635345	52.231129	0.119412	132.756108	-0.502519	0.502519	0.703526	-1	0	0	121.894731	145.973186	129.993238	7.16811	0.055142	143.536582	143.267153	1.001881	172.2211	46.94196	63.13185	0.00235	0.0577	0.00448	46.94196	172.22177	63.13425	3.00E-05
Ba2S4Zr1	icsd_069853	Ba	Zr	S	0	0	1	124	tetragonal	139	I4/mmm (139)	4.056104	28.899489	117.21933	7	0.8725	6.857143	55.087664	55.087536	55.0876	29.710069	26.578312	28.14419	0.589159	72.146115	-0.57735	-0.57735	-0.57735	0	-1	0	56.839983	104.368098	66.782313	9.581436	0.143473	91.963882	78.157311	1.176651	114.37225	21.08786	29.91967	-0.00057	-0.00493	-0.00087	21.08786	114.3746	29.92253	0.00088
Ba3Ge1O1	icsd_050512	O			0	1	0	113	orthorhombic	62	Pnma (62)	5.168914	32.165351	166.259918	20	0.3768	5.55	36.319508	36.185017	36.252262	20.372505	20.129014	20.25076	0.064199	51.215784	-1	0	0	-0.579324	-0.744845	-0.331042	44.228464	54.51402	51.656532	2.153192	0.041683	50.325721	48.432984	1.039079	56.98736	21.68778	25.33319	-0.00527	0.02683	0.01005	21.68778	63.1479	24.97712	-0.00984
Ba3I2P3	icsd_391128	P	I		1	0	0	233	orthorhombic	62	Pnma (62)	4.351479	36.190842	157.483677	32	0	6.5	25.958932	25.945517	25.952224	14.674903	13.754712	14.214808	0.335017	36.060601	-0.747409	0	0.664364	0	0	-1	27.342721	44.998879	35.002719	4.290616	0.12258	36.253583	37.275492	0.972585	45.86067	19.17196	14.09496	0.00472	0.00288	0.01692	19.17196	47.14524	11.91622	0.0042
Ba3In2O6	icsd_039267	Ba	O		0	0	1	236	tetragonal	139	I4/mmm (139)	6.152053	18.099436	111.348696	11	0.8569	3.636364	88.795758	88.284407	88.540082	40.626555	33.048598	36.837576	1.152279	97.052931	-1	0	0	-0.707107	-0.707107	0	54.915482	147.19598	97.066169	20.412628	0.210296	119.565227	96.726115	1.236121	127.4701	95.28977	52.25616	-0.00639	0.01058	0.00681	95.28977	127.61733	52.41644	0.01812
Ba3In2P4	icsd_402812	Ba			1	0	0	234	monoclinic	15	C2/c (15)	4.55901	30.980472	141.240272	18	1.1204	5.222222	40.685267	39.070462	39.877864	21.938274	18.513412	20.225843	0.966298	51.902618	-0.274721	0	0.961524	0	-1	0	27.055128	81.39995	50.636526	10.39457	0.205278	47.09606	49.789289	0.945907	70.81698	19.27351	31.71314	-0.00867	-4.1323	0.00122	19.27351	92.70322	23.8484	-0.01111
Ba3O9Y4	icsd_087118	O			0	0	1	349	trigonal	146	R3 (146)	5.220938	18.121092	94.609093	16	3.2407	7.5	97.60978	97.469262	97.539521	48.023742	45.328613	46.676177	0.29873	120.765054	0	-0.768221	0.640184	0	0	-1	99.299592	163.440496	115.953408	12.230246	0.105476	163.440496	134.169533	1.218164	172.70668	76.08305	49.44689	-2.82919	0.34123	0.00651	76.08305	172.70955	49.45632	2.88653
Ba3S7Zr2	icsd_075241	Zr	S		0	0	1	237	tetragonal	139	I4/mmm (139)	4.07577	27.802285	113.31572	12	0.789	6.583333	59.143039	59.079363	59.111201	31.851533	28.763417	30.307475	0.537891	77.651308	-0.553372	0.553372	-0.622543	-1	0	0	61.707274	111.925195	72.27499	10.135517	0.140235	95.417985	87.222506	1.093961	123.35764	25.30403	31.54597	0.004	0.00798	0.00109	25.30403	123.32924	31.54645	0.00119
Be1Hf1Si1	icsd_108103	Hf			0	0	1	111	hexagonal	194	P6_3/mmc (194)	8.161939	14.62037	119.330569	6	0	10	142.611953	141.489991	142.050972	120.05842	119.069056	119.563738	0.049475	280.103797	0	0	-1	-0.735215	0.441129	-0.51465	231.455138	291.704401	282.126032	12.268551	0.043486	231.455138	282.210557	0.820151	309.39055	69.97229	67.45219	-0.00426	-0.00109	-0.00367	69.97229	308.60376	67.57664	-0.00092
Be1Li1N1	icsd_402341	Li			1	0	0	111	monoclinic	14	P2_1/c (14)	1.923111	8.623101	16.583182	12	2.7116	6.5	102.119634	85.453916	93.786775	73.948669	56.241602	65.095135	1.769222	158.593446	-0.986394	0	-0.164399	-0.573462	0	0.819232	81.951861	325.025791	160.922985	60.844429	0.378097	85.29437	139.482702	0.611505	139.26271	65.59145	87.76323	0.01075	-41.15143	0.00968	65.59145	149.23939	44.93628	0.02729
Be1Li1P1	icsd_042037	Li	Be	P	0	0	1	111	tetragonal	129	P4/nmm (129)	1.992503	13.036204	25.97467	6	1.1545	10	64.105712	62.704108	63.40491	47.982451	38.709476	43.345964	1.220118	105.904474	-0.707107	0.707107	0	-1	0	0	64.60781	169.331933	95.734849	20.173081	0.210718	107.990068	98.547998	1.095812	174.49145	8.56854	24.12049	-0.00118	-0.00944	0.00053	8.56854	174.49173	24.12171	-0.00137
Be1Li1Sb1	icsd_100114	Sb			0	0	1	111	hexagonal	186	P6_3mc (186)	4.470297	17.051668	76.226027	6	0.8636	8.666667	56.680446	56.460934	56.57069	46.974481	46.62735	46.800915	0.041112	110.053633	-0.565685	0.424264	0.707107	-0.099504	-0.995037	0	104.417701	116.410852	108.909313	4.104676	0.037689	116.33748	116.391466	0.999536	125.90805	31.42291	18.66869	-0.00187	0.00259	0.00622	31.42291	125.91647	18.67367	-0.00113
Be1Na1Sb1	icsd_100092	Na			0	0	1	111	hexagonal	194	P6_3/mmc (194)	3.61256	23.559255	85.109228	6	1.0466	10	40.997073	28.098146	34.54761	28.792676	18.723543	23.75811	3.147963	57.982878	-0.5547	0	-0.83205	0	-1	0	30.846569	111.111871	52.566494	25.248187	0.48031	35.887682	111.067598	0.323116	119.78987	30.41482	7.95505	0.00531	-0.00247	0.00212	30.41482	119.80683	7.95356	0.00601
Be1Si1Zr1	icsd_076123	Zr			0	0	1	111	hexagonal	194	P6_3/mmc (194)	4.730405	15.015143	71.02771	6	0	10	136.662534	135.457142	136.059838	120.047513	118.797841	119.422677	0.061495	277.174115	0	0	-1	-0.868243	0	0.496139	222.921662	289.95027	279.323204	14.00382	0.050135	222.921662	280.910611	0.793568	304.47677	61.18205	63.45667	-0.00033	-0.00415	0.00421	61.18205	304.2752	63.48551	-0.002
Be2Ca1Ge2	icsd_025337	Be	Ge		0	0	1	122	tetragonal	129	P4/nmm (129)	4.219252	16.008729	67.544861	10	0	11.4	73.472716	73.180997	73.326856	55.940473	43.619974	49.780224	1.416241	121.782137	0	-1	0	0	0	-1	61.513676	161.632233	123.457124	26.90168	0.217903	161.632233	102.37445	1.578834	109.46942	71.82417	31.5701	-0.01464	-0.02185	-0.03451	71.82417	109.35207	31.51614	-0.00639
Be2F5Rb1	icsd_028541	Rb			0	0	1	125	triclinic	1	P1 (1)	2.688038	15.326729	41.198835	8	7.108	4.125	20.057813	17.728931	18.893372	15.336498	12.595971	13.966235	1.219219	33.615656	-0.099015	-0.099015	-0.990148	-0.452679	-0.814822	-0.362143	21.952847	52.382794	31.903027	7.233773	0.226743	22.261929	37.521219	0.593316	45.29651	8.46045	9.67443	-5.72053	-5.13156	2.33352	8.46045	49.28385	11.58998	0.08999
Be2La2O5	icsd_036063	O			0	0	1	225	monoclinic	15	C2/c (15)	5.865028	11.823078	69.34268	18	3.7036	5.611111	142.215501	134.95221	138.583856	78.903657	71.793622	75.348639	0.548993	191.364091	-0.707107	0.565685	-0.424264	-0.83205	0	0.5547	129.897436	261.38812	187.113986	36.875283	0.197074	215.240231	182.529014	1.179211	232.15707	76.55056	94.35495	-0.01035	-41.17718	0.01589	76.55056	283.98909	79.36377	0.02584
Be2Mg1N2	icsd_413358	Mg	Be		0	0	1	122	trigonal	164	P-3m1 (164)	3.034406	7.698832	23.361378	5	4.0909	5.6	186.709096	186.564904	186.637	170.533853	162.787024	166.660438	0.238717	385.295958	-0.696526	-0.398015	0.597022	-0.813733	-0.464991	-0.348743	315.262686	453.720138	378.662871	36.369859	0.096048	391.120018	406.236135	0.96279	435.81203	66.15198	66.88089	36.70613	0.01544	-0.00173	66.15198	435.79509	66.88296	-36.68646
Be4Ca2N4	icsd_413357	Ca			0	0	1	244	tetragonal	140	I4/mcm (140)	2.680126	10.671034	28.599713	10	2.4561	9.4	133.176573	92.254194	112.715384	78.618918	47.018041	62.81848	3.804088	158.930431	-0.857493	0	0.514496	-0.707107	-0.707107	0	91.281858	408.907835	140.324438	63.702403	0.453965	122.188312	219.327897	0.557103	272.61186	220.43206	22.11061	-0.02458	0.01054	0.01169	220.43206	272.5857	22.06924	0.00282
Be4N4Sr2	icsd_413356	Sr			0	0	1	244	tetragonal	140	I4/mcm (140)	3.673406	12.083821	44.38878	10	1.8643	9.6	118.997074	90.518324	104.757699	78.456481	58.652895	68.554688	2.002821	168.834878	-0.6	0	0.8	-0.707107	0.707107	0	107.812616	355.931541	158.865009	58.792444	0.370078	121.99232	262.112903	0.465419	265.54177	155.27242	26.01572	0.00305	0.00956	0.00156	155.27242	265.58245	26.03119	0.00765
Bi1Cu1Sr1	icsd_058777	Sr			0	0	1	111	hexagonal	194	P6_3/mmc (194)	6.935456	28.74298	199.345688	6	0	10	40.015594	36.397646	38.20662	20.121895	14.014533	17.068214	2.278339	44.567961	-0.707107	0.707107	0	-1	0	0	19.571033	67.329387	39.092611	11.624284	0.297352	45.687314	33.585838	1.360315	84.76531	35.0239	18.35813	-0.01392	-0.00041	0.28601	35.0239	81.84019	17.78051	-0.01616
Bi1Fe1O3	icsd_162834	Bi			1	0	1	113	monoclinic	11	P2_1/m (11)	8.772287	11.843108	103.891144	10	0	7.9	120.874746	119.971588	120.423167	55.770507	44.355578	50.063043	1.29428	131.909698	-0.668965	0	-0.743294	0	-1	0	69.529266	189.112873	121.200658	30.896202	0.254918	69.82332	112.591777	0.620146	229.95362	65.3679	94.19673	0.03558	0.91277	-0.00427	65.3679	217.3349	63.40205	0.03634
Bi1Fe1O3	icsd_168321	Fe			0	1	0	113	orthorhombic	62	Pnma (62)	9.169285	11.330344	103.891144	20	0	4.7	179.561249	178.824112	179.19268	73.886621	71.37465	72.630636	0.180093	191.957128	-1	0	0	-0.597022	-0.79603	0.099504	141.995917	223.008793	194.166288	16.706849	0.086044	191.485247	170.074783	1.125889	237.80998	139.65181	140.19275	0.00018	-0.76132	0.00121	139.65181	285.70321	130.40778	0.00076
Bi1K1Mg1	icsd_616748	K	Mg		0	0	1	111	tetragonal	129	P4/nmm (129)	4.369899	34.501462	150.767899	6	0.411	11.166667	20.018889	19.475161	19.747025	13.194895	12.17916	12.687028	0.444916	31.347685	-0.264906	0.264906	-0.927173	-1	0	0	24.646693	42.280878	30.382626	4.658708	0.153335	24.824936	38.61659	0.642857	46.58245	6.74039	11.03425	0.00049	0.00331	-0.00013	6.74039	46.57943	11.03366	0.00272
Bi1K1Mn1	icsd_601586	K	Mn	Bi	0	0	1	111	tetragonal	129	P4/nmm (129)	5.410464	30.999868	167.723686	6	0	9.833333	16.511911	16.120424	16.316167	7.051839	4.950392	6.001115	2.146791	16.037178	-0.147043	0.661693	0.735215	-0.571548	-0.816497	-0.08165	8.274248	32.145647	14.148796	5.184529	0.366429	20.787558	24.934235	0.833695	29.05371	12.65118	9.85905	1.02545	0.15504	0.97647	12.65118	31.02776	9.08457	0.19123
Bi1La2O2	icsd_422645	Bi			0	0	1	122	tetragonal	139	I4/mmm (139)	6.974683	24.702805	172.294229	5	0	12	57.471743	56.186783	56.829263	23.101622	19.492669	21.297146	0.94859	56.796483	-1	0	0	-0.707107	0.707107	0	36.840744	87.159168	55.93143	10.839419	0.193798	72.177432	60.320675	1.196562	86.47184	64.9658	32.10145	-0.01216	0.01411	-0.13222	64.9658	86.53774	32.14869	0.02333
Bi1Na1O3	icsd_027553	Na			0	0	1	113	trigonal	148	R-3 (148)	6.140565	15.141876	92.979667	10	1.1226	4.8	64.492197	51.654674	58.073435	30.289002	23.327099	26.808051	1.740761	69.699224	-0.562254	-0.40161	0.722897	-0.79603	-0.597022	-0.099504	41.649281	111.033428	63.53881	20.567742	0.323704	64.309485	105.944449	0.607011	144.33661	69.24528	21.17085	4.66469	-1.75765	0.00938	69.24528	144.42399	21.16607	-4.7409
Bi1O2Y2	icsd_261432	Bi			0	0	1	122	tetragonal	139	I4/mmm (139)	6.452453	21.555168	139.083706	5	0	13.6	67.221081	64.625495	65.923288	32.131017	26.486971	29.308994	1.105602	76.578275	-0.217643	-0.652929	-0.725476	-0.768221	-0.640184	0	50.745369	123.539802	71.286198	18.752834	0.263064	91.314556	110.043696	0.829803	130.22564	59.92754	31.5779	0.06456	0.00148	3.03284	59.92754	127.72494	31.11117	-0.07307
Bi1O3Rh1	icsd_108996	Rh			0	0	1	113	orthorhombic	62	Pbnm (62)	9.482877	12.603802	119.520301	20	0.8545	4.6	175.272004	172.324212	173.798108	64.135927	53.610418	58.873173	0.998772	158.699935	-0.747409	0	-0.664364	-0.668965	0.743294	0	88.335732	221.692407	151.651388	34.181751	0.225397	220.511902	185.29927	1.190031	229.49157	152.0196	104.39123	0.0101	-0.02445	-0.00924	152.0196	269.95493	135.56209	-0.01085
Bi1O3Sr1	icsd_085173	Bi			0	0	1	113	monoclinic	14	P2_1/c (14)	7.146369	16.014267	114.443868	20	0.3728	4.65	108.204773	107.817314	108.011044	52.624278	51.137713	51.880996	0.148943	134.162248	-0.707107	0	0.707107	-0.588348	0.784465	0.196116	105.675028	156.357107	133.14524	10.839169	0.081409	145.807485	141.284009	1.032017	170.96377	86.63537	65.9678	0.00188	-0.53747	0.00634	86.63537	187.39834	64.9508	-0.00808
Bi1O4Sb1	icsd_080821	Bi			0	0	1	114	monoclinic	15	C2/c (15)	7.889102	13.847748	109.246293	12	2.3798	3.333333	97.652682	53.619098	75.63589	65.058679	37.815885	51.437282	4.42326	125.795497	-0.707107	0	0.707107	-0.393919	0	-0.919145	28.112093	232.314122	121.156554	52.054593	0.429647	104.988431	146.854293	0.714916	199.06234	63.13807	39.88106	0.0745	57.25304	-0.01867	63.13807	159.65648	55.14447	0.07568
Bi1O4Ta1	icsd_097423	Bi			0	1	0	114	orthorhombic	52	Pnna (52)	8.745301	14.365076	125.626921	24	3.0082	3.333333	92.63678	92.332182	92.484481	45.687538	43.138006	44.412772	0.298808	114.853402	0	-0.624695	-0.780869	-1	0	0	95.850279	151.837039	110.447787	11.802543	0.106861	146.443772	125.719806	1.164842	184.43363	40.59289	67.85776	-0.00805	0.0011	-0.04253	40.59289	170.13345	57.43675	-0.03775
Bi1Rb1S2	icsd_052735	Rb	Bi	S	0	0	1	112	trigonal	166	R-3m (166)	5.048782	29.483992	148.858252	4	1.3413	6	37.436612	37.416592	37.426602	23.473169	20.326879	21.900024	0.774459	54.976902	-0.737865	0.421637	-0.527046	0	-0.894427	0.447214	38.633706	76.788084	53.105788	9.677259	0.182226	50.795354	54.05399	0.939715	70.58723	19.30017	23.49438	9.65766	-0.01523	-0.01451	19.30017	70.62845	23.51884	-9.68184
Bi1S2Tl1	icsd_172572	Tl	Bi		0	0	1	112	trigonal	166	R-3m (166)	7.116139	27.855582	198.224202	4	0.4852	6	41.24813	40.807013	41.027572	23.764406	19.800177	21.782291	1.011869	55.521143	0	-0.819232	-0.573462	-0.777778	0.444444	0.444444	38.779152	82.792941	53.46852	11.339296	0.212074	42.064391	55.189113	0.762186	77.33155	23.00439	28.13926	10.82929	-0.01374	-0.02931	23.00439	77.3791	28.18325	-10.88176
Bi1Se2Tl1	icsd_043314	Tl	Bi		0	0	1	112	trigonal	166	R-3m (166)	7.686949	30.85225	237.159685	4	0.2392	6	35.825937	35.300934	35.563435	21.93009	17.293909	19.612	1.355281	49.700049	0	-0.847998	-0.529999	0	-0.874157	0.485643	33.733936	78.851896	47.486365	11.53049	0.242817	34.256005	46.683177	0.733798	68.00936	19.37988	24.8338	11.39321	-0.01145	-0.03356	19.37988	67.95249	24.83448	-11.43778
Bi1Te2Tl1	icsd_015412	Tl	Bi		1	1	1	112	trigonal	166	R-3m (166)	7.651884	36.271327	277.543988	4	0.4349	6	29.037619	28.41181	28.724714	20.142873	14.508402	17.325638	1.963822	43.276091	-0.940721	-0.282216	-0.188144	-0.348155	-0.870388	0.348155	26.20239	74.154136	39.421054	10.82663	0.274641	32.156048	40.734815	0.7894	44.87057	19.56681	14.97277	4.43573	-5.7552	-9.40462	19.56681	60.06818	11.0318	-8.40141
Bi2Ca1Mg2	icsd_100048	Ca	Mg		0	0	1	122	trigonal	164	P-3m1 (164)	5.489922	30.64925	168.261996	5	0.4621	5.6	35.377041	35.092195	35.234618	22.589587	22.188222	22.388904	0.098563	55.426868	0	-0.847998	0.529999	-0.762493	0.457496	-0.457496	49.983776	62.812248	55.305159	3.476735	0.062865	51.383358	55.797535	0.920889	67.66647	23.79289	19.04781	-3.13393	0.01263	-0.03066	23.79289	67.65965	19.03646	3.13749
Bi2Ca4O1	icsd_416137	Ca	Bi		0	0	1	124	tetragonal	139	I4/mmm (139)	5.238789	26.909489	140.973148	7	0.8121	6.857143	45.385221	45.243889	45.314555	30.244869	29.023023	29.633946	0.21362	72.990796	-0.613941	0	0.789352	-0.707107	0.707107	0	63.489889	88.937863	71.853697	7.578788	0.105475	68.680494	85.297916	0.805184	91.39425	23.41359	24.8496	-0.00306	0.05906	0.00057	23.41359	91.40501	24.85165	0.00442
Bi2Ge1Te4	icsd_658633	Ge	Bi	Te	0	0	1	124	trigonal	166	R-3m (166)	6.982593	34.007027	237.457236	7	0.7546	6	22.07304	12.671503	17.372271	15.541788	10.416351	12.979069	3.202228	31.173757	0	0	-1	-0.845154	0.507093	0.169031	11.457124	57.633051	29.965616	13.167954	0.439435	11.457124	51.913636	0.220696	61.50954	14.05938	8.43997	4.34121	0.00864	0.02073	14.05938	61.67596	8.55329	-4.53407
Bi2Ge3Te6	icsd_016207	Te			0	0	1	236	trigonal	160	R3m (160)	6.667224	31.732073	211.564838	11	0	5.454545	27.804434	20.763961	24.284198	18.309567	13.523538	15.916552	2.10859	39.188012	0	0	-1	0	-0.936329	-0.351123	17.679025	69.003766	37.424142	11.894407	0.317827	17.679025	45.765175	0.386299	64.95249	19.11762	14.71529	-8.65753	-0.02142	1.83195	19.11762	66.70453	14.14954	8.93256
Bi2I1Te1	icsd_250330	Bi	Te	I	0	0	1	112	trigonal	166	R-3m (166)	6.77566	41.200958	279.163665	8	0	5.125	14.774772	6.001481	10.388127	6.428905	3.846944	5.137924	4.817716	13.232237	0	0	-1	-0.963087	0.240772	-0.120386	4.868088	30.362855	11.724772	5.853353	0.49923	4.868088	21.575	0.225636	36.12909	16.34576	5.44037	-0.35508	2.00161	-2.30686	16.34576	36.19127	5.53268	0.33326
Bi2La1Li1	icsd_415728	Li	La	Bi	0	0	1	112	tetragonal	129	P4/nmm (129)	7.953732	29.427187	234.055959	8	0	9.5	44.445213	38.2954	41.370307	31.77072	27.131897	29.451308	1.015454	71.408751	0	0	-1	-0.707107	-0.707107	0	33.163506	97.991163	72.944263	16.486735	0.226018	33.163506	87.50534	0.378988	94.01998	31.2707	26.2989	-0.00277	0.0061	0.00317	31.2707	94.04331	26.30043	-0.00583
Bi2La1Li3	icsd_616769	Li	La		0	0	1	123	trigonal	164	P-3m1 (164)	6.346937	25.189985	159.879239	6	0.4657	12.333333	36.303176	36.302889	36.303032	28.236353	22.241736	25.239044	1.347614	61.471479	0	-0.83205	0.5547	0	-0.913812	-0.406138	37.518133	89.607003	57.420832	13.017926	0.226711	65.901896	59.845128	1.101207	76.77075	14.46319	17.83642	-14.01806	0.00837	0.00258	14.46319	76.71583	17.87481	14.01711
Bi2Li3Y1	icsd_616795	Li	Y		0	0	1	123	trigonal	164	P-3m1 (164)	6.233624	23.428029	146.041521	6	0	12.333333	38.553557	38.51539	38.534473	28.611076	23.768782	26.189929	1.019616	64.057561	-0.707107	0.424264	0.565685	0	-0.919145	-0.393919	41.5204	90.066839	60.665227	12.198537	0.20108	67.201873	64.963564	1.034455	81.01745	17.62592	18.8123	-12.51308	0.04472	0.00659	17.62592	81.02241	18.83917	12.49823
Bi2Ni3S2	icsd_093006	Bi			0	0	1	223	monoclinic	12	C2/m (12)	8.449078	18.479082	156.13121	28	0	5.785714	60.58562	60.128799	60.35721	21.946724	20.852257	21.399491	0.270031	57.413235	-0.290021	0.676716	-0.676716	-0.970143	0	-0.242536	43.136257	70.326722	55.53089	6.345004	0.114261	68.373249	64.760135	1.055792	99.23928	49.31823	42.25208	-0.18923	4.82612	0.30544	49.31823	94.41904	38.77768	0.51754
Bi2Ni3S2	icsd_159360	Bi			1	1	1	223	trigonal	166	R-3m (166)	8.537993	18.286641	156.13121	7	0	6.714286	74.934353	70.462869	72.698611	24.657948	13.553788	19.105868	4.15979	52.700847	-0.498273	-0.249136	0.830455	-0.581914	-0.363696	-0.727393	22.77031	103.286665	46.338274	25.013598	0.539804	91.352843	28.062633	3.25532	135.95057	54.43576	53.55433	0.8163	5.78974	7.98937	54.43576	108.77531	56.14908	1.08074
Bi2Ni3S2	icsd_616874	Bi			0	0	1	223	monoclinic	12	C2/m (12)	8.44267	18.493109	156.13121	14	0	5.642857	61.561148	61.218149	61.389648	21.921897	20.037266	20.979581	0.475884	56.502293	-0.348367	0.696733	0.62706	-0.976187	0	0.21693	37.260823	71.31204	54.089011	8.454762	0.156312	68.179079	64.287388	1.060536	99.88976	49.68113	41.77256	-0.33106	-4.04863	0.13355	49.68113	96.44499	41.56602	-0.43377
Bi2Ni3Se2	icsd_001024	Bi			0	0	1	223	monoclinic	12	C2/m (12)	9.078968	19.647614	178.380058	14	0	5.642857	59.364339	59.118777	59.241558	22.999401	21.518714	22.259058	0.3482	59.344583	-0.19803	0.693103	0.693103	0	-1	0	42.258587	71.956014	57.432103	7.441484	0.12957	68.714199	65.690913	1.046023	93.15635	46.98284	43.93723	-0.10683	-3.13963	-0.01427	46.98284	98.38436	34.67966	-0.06119
Bi2O2Se1	icsd_411143	Se	O		0	0	1	122	tetragonal	139	I4/mmm (139)	9.178107	19.138838	175.658302	5	0.4079	11	78.919791	75.812642	77.366216	33.352809	19.801727	26.577268	3.462676	71.53988	-0.070535	0.705346	0.705346	-0.707107	0.707107	0	36.516653	141.251773	60.101056	28.697285	0.477484	100.058007	129.563119	0.772272	150.4807	67.51569	39.90906	0.02544	0.04111	-0.00938	67.51569	150.4816	39.89964	-0.01084
Bi2Pb2Se5	icsd_030372	Bi	Se		0	0	1	225	trigonal	164	P-3m1 (164)	7.297258	31.027609	226.416456	9	0.793	6	20.622064	7.469522	14.045793	13.344665	6.250779	9.797722	7.435228	23.848052	0	0	-1	-0.854358	-0.512615	0.085436	7.072425	56.057005	20.929727	14.425045	0.689213	7.072425	54.689082	0.129321	62.39312	16.75919	4.87721	-2.00881	-0.06594	0.01229	16.75919	62.44229	4.90615	2.06239
Bi2Pb2Te5	icsd_042708	Te	Pb		0	0	1	225	trigonal	164	P-3m1 (164)	7.383308	36.743411	271.287904	9	0.1882	6	23.475696	19.163374	21.319535	13.532123	10.30672	11.919422	1.789738	30.141121	0	0	-1	-0.814822	0.452679	-0.362143	15.388848	50.269183	28.861351	8.577016	0.29718	15.388848	35.232424	0.436781	50.79792	16.58518	13.89758	-6.44234	0.03554	-0.02297	16.58518	50.75311	13.83369	6.39471
Bi2Pd3S2	icsd_616954	Bi			0	0	1	223	monoclinic	12	C2/m (12)	8.773394	21.667361	190.096297	14	0	5	52.004554	51.447158	51.725856	13.043061	10.453778	11.748419	1.249278	32.764661	-0.407307	0.678844	0.61096	0	-1	0	17.571923	51.878746	30.187468	8.131207	0.269357	42.818283	36.956578	1.158611	70.05673	37.52034	42.83512	-0.03069	4.73469	0.00974	37.52034	79.22841	41.48865	-0.01125
Bi2Pd3Se2	icsd_261458	Bi			0	0	1	223	monoclinic	12	C2/m (12)	9.390898	22.611804	212.345145	14	0	5.285714	52.802237	52.781015	52.791626	15.936266	12.916808	14.426537	1.169212	39.666359	-0.256307	0.683486	0.683486	0	-1	0	20.552486	58.59843	36.812082	9.271049	0.251848	49.704779	46.24511	1.074812	78.68991	38.51363	43.32222	-0.04104	-2.07579	0.0032	38.51363	82.10949	36.6754	0.0045
Bi2Pd3Se2	icsd_421873	Bi	Pd		0	0	1	223	monoclinic	12	C2/m (12)	9.390624	22.612464	212.345145	14	0	5.357143	52.769489	52.74749	52.758489	15.950777	12.917119	14.433948	1.174695	39.682953	-0.229416	-0.688247	0.688247	0	-1	0	20.52871	58.616163	36.82436	9.299362	0.252533	49.7206	46.253218	1.074965	78.70668	38.45672	43.29697	-0.01429	-2.07235	-0.02599	38.45672	82.06834	36.63232	0.04063
Bi2Rh3S2	icsd_420725	Bi	Rh		0	0	1	223	monoclinic	12	C2/m (12)	9.230975	20.322357	187.59517	14	0	6.785714	65.89158	63.850786	64.871183	27.729162	25.530229	26.629695	0.462615	70.273326	-0.57735	0.11547	-0.80829	-1	0	0	52.368147	104.312536	67.92021	10.758305	0.158396	64.078462	82.752833	0.774336	130.8062	49.13493	37.57485	-0.0255	0.28787	0.01135	49.13493	107.17623	47.18896	0.12596
Bi2Sr1Zn1	icsd_041924	Sr	Zn	Bi	0	0	1	112	tetragonal	139	I4/mmm (139)	7.815922	30.325998	237.025638	8	0	9.75	35.109543	28.634672	31.872108	19.039014	15.685353	17.362183	1.295162	44.082052	0	0	-1	-0.668965	-0.743294	0	19.776705	63.317184	44.402464	11.522544	0.259502	19.776705	58.241718	0.339563	69.11375	26.47665	22.38581	0.17769	0.0186	-0.00544	26.47665	72.59834	23.07667	-0.03497
Bi3Br1O4	icsd_201691	Br			0	0	1	134	orthorhombic	52	Pnan (52)	7.787581	20.545763	160.001796	32	2.3733	8.4375	31.173913	30.177577	30.675745	19.1819	17.102039	18.141969	0.64109	45.463393	-0.624695	0	-0.780869	-1	0	0	32.28262	74.930313	42.868011	7.278515	0.169789	41.796249	54.119496	0.772296	78.68014	12.83607	11.10857	-0.00089	0.00352	-0.0149	12.83607	68.08112	19.02898	-0.00601
Bi3Cl1O4	icsd_409330	Cl			0	0	1	134	monoclinic	15	C2/c (15)	7.611254	19.80951	150.775219	16	2.3837	7.5	31.97689	30.921298	31.449094	19.394466	16.893285	18.143876	0.774427	45.652264	-0.640184	0	-0.768221	-1	0	0	31.377211	73.882335	42.70109	8.308256	0.194568	44.865267	58.917905	0.761488	77.41045	13.04928	10.80468	0.03316	-1.1348	0.03573	13.04928	71.30054	20.07673	0.02898
Bi3Mn2O7	icsd_184382	O			1	0	0	237	orthorhombic	36	Ccm2_1 (36)	8.967168	13.09859	117.457255	24	0	2.625	90.672473	86.848424	88.760448	34.765708	33.131357	33.948532	0.290678	90.329393	-0.76337	-0.254457	0.593732	0	-1	0	74.266123	124.620893	87.413049	11.187523	0.127985	88.6272	108.265592	0.818609	115.97995	53.89786	59.04626	0.94023	0.00658	-0.03229	53.89786	168.32376	75.63762	-0.11173
Bi4Ge1Te7	icsd_042891	Ge	Bi	Te	0	0	1	147	trigonal	164	P-3m1 (164)	7.145446	34.892796	249.324584	12	0.745	6	22.321809	13.468134	17.894971	16.074917	11.171892	13.623404	2.851737	32.59796	0	0	-1	0	-0.970143	-0.242536	11.710918	58.240566	31.717582	12.602192	0.397325	11.710918	48.815896	0.2399	60.26281	14.10503	9.48493	-5.78764	-0.0096	-0.0039	14.10503	60.31527	9.50219	5.85574
Br1Ca2N1	icsd_062556	Ca	Br		0	0	1	112	trigonal	166	R-3m (166)	3.482983	20.74691	72.261127	4	2.4334	6	55.740921	55.155678	55.448299	36.433895	34.890367	35.662131	0.231808	88.099115	-0.62706	-0.348367	0.696733	-0.843274	-0.527046	-0.105409	72.627923	104.464616	85.764224	9.46467	0.110357	93.95072	102.830868	0.913643	116.85944	34.98115	24.11883	3.22849	-0.00051	0.00286	34.98115	116.80408	24.09847	-3.25724
Br1Cd2P3	icsd_100817	P			0	0	1	123	monoclinic	9	Cc (9)	4.62226	23.809015	110.051457	12	1.1928	3.583333	44.76928	43.3416	44.05544	24.328196	23.097814	23.713005	0.299282	60.317055	-0.707107	0	-0.707107	-0.725476	-0.652929	0.217643	45.8481	77.311711	60.141829	7.874444	0.130931	62.924773	64.947335	0.968858	80.68118	40.00583	21.76709	-0.01402	-3.71825	0.00932	40.00583	74.27823	25.45967	0.0021
Br1Hg2P3	icsd_074770	Hg			0	1	0	123	orthorhombic	60	Pbcn (60)	6.422787	24.73376	158.859673	24	0.9509	6.625	42.532366	40.468037	41.500201	19.389245	17.665137	18.527191	0.539009	48.381781	0	-1	0	-0.658505	0	0.752577	30.259991	62.593323	48.882404	7.811582	0.159804	30.259991	54.943658	0.550746	67.94058	31.11972	35.09882	0.01512	-0.00092	0.0031	31.11972	48.13716	30.27015	0.01647
Br1La1O1	icsd_041065	Br	O		0	0	1	111	tetragonal	129	P4/nmm (129)	5.622467	23.11614	129.969745	6	3.7187	11.333333	44.635514	7.234985	25.93525	29.366669	8.068315	18.717492	18.368161	45.263559	0	0	-1	-0.666667	-0.666667	0.333333	3.717288	86.989236	44.388732	28.639688	0.645202	3.717288	63.089099	0.058921	116.02062	31.96524	23.61482	0.00842	-0.00259	0.01373	31.96524	116.04682	23.61876	0.01044
Br1N1Sr2	icsd_172600	Sr	Br		0	0	1	112	trigonal	166	R-3m (166)	4.451187	25.10202	111.733794	4	1.8476	6	45.252279	45.146384	45.199332	27.746681	26.54036	27.143521	0.229607	67.848827	-0.690268	-0.383482	0.613572	0	-0.961524	0.274721	54.481371	79.481128	66.30289	6.666059	0.100539	74.545001	73.390854	1.015726	87.48151	28.55671	22.88932	5.01313	0.0151	0.00076	28.55671	87.48568	22.91338	-4.99757
Br1Se2Tl5	icsd_075960	Br			0	0	1	125	tetragonal	140	I4/mcm (140)	8.015151	32.623338	261.480994	16	0.3929	6.1875	18.852406	17.346631	18.099518	8.952047	8.322371	8.637209	0.465108	22.355555	-0.613941	0	0.789352	-0.707107	0.707107	0	17.741009	30.801531	21.766708	3.91566	0.179892	20.382197	29.2353	0.697178	36.65533	17.30803	9.50687	0.00041	0.01569	-0.01159	17.30803	36.6524	9.50193	0.0025
Br2Ca3Si1	icsd_089537	Br			0	0	1	123	tetragonal	139	I4/mmm (139)	2.958573	28.82345	85.276277	6	0	6	27.018976	23.458249	25.238612	15.818527	12.005457	13.911992	1.739847	35.257736	-0.995037	0	-0.099504	-0.658505	0.752577	0	19.319796	63.017401	33.362971	8.71847	0.261322	43.480469	40.644559	1.069773	35.7482	29.6373	5.87628	0.7064	-0.15033	-0.25221	29.6373	54.49453	16.4538	-0.21802
Br2Ca3Si1	icsd_089538	Br			0	0	1	123	orthorhombic	71	Immm (71)	2.886967	29.538362	85.276277	6	0.2844	6	28.366804	25.628642	26.997723	17.268699	13.908911	15.588805	1.314622	39.218086	-0.650791	0	-0.759257	0	-1	0	22.710739	77.671604	36.818477	10.732176	0.291489	31.102751	51.662016	0.602043	51.49106	9.32503	12.56878	-0.00022	-0.01844	0.00572	9.32503	86.71251	18.09761	0.00212
Br2Ca3Si1	icsd_089540	Si			1	1	1	123	trigonal	166	R-3m (166)	2.389145	35.693219	85.276277	6	0	6	22.501974	20.242474	21.372224	9.419255	6.735937	8.077596	2.103414	21.521455	-0.707107	0	-0.707107	-0.287348	0	0.957826	12.342418	35.437684	19.797778	6.840978	0.345543	14.994242	21.572427	0.695065	22.85435	15.90944	16.18814	-0.02211	-0.78968	-0.00474	15.90944	43.63167	14.8022	-0.089
Br2Cs1Li1	icsd_245979	Li	Br		0	0	1	112	tetragonal	129	P4/nmm (129)	3.586267	34.687033	124.39696	8	4.1426	8.5	14.214783	13.736214	13.975499	7.76612	2.996961	5.381541	7.991498	14.308085	0	-1	0	-0.707107	-0.707107	0	3.651808	37.045103	11.920459	6.204232	0.520469	24.60529	13.936272	1.765558	22.26614	20.34822	4.31155	0.00106	0.00462	0.00141	20.34822	22.25282	4.30863	0.00091
Br2Ge3La3	icsd_414172	La	Ge	Br	1	0	0	233	monoclinic	12	C2/m (12)	5.721484	28.821318	164.900719	16	0	7.4375	50.341048	49.976904	50.158976	29.476749	27.875503	28.676126	0.2945	72.258249	-0.913812	0	0.406138	-0.163846	0.655386	0.737309	56.444138	93.839636	72.1401	8.106192	0.112367	64.499521	79.34857	0.812863	81.89438	33.65766	28.19846	0.10416	6.45442	-0.13975	33.65766	88.70522	36.67793	-0.39101
Br2Hg5O4	icsd_038605	Br			1	0	0	245	orthorhombic	72	Ibam (72)	8.804441	21.033551	185.188659	22	0	4.727273	49.043096	46.852739	47.947917	13.479999	12.033103	12.756551	0.647965	35.152234	-0.707107	-0.707107	0	0	-1	0	26.607055	48.055133	32.778209	5.597652	0.170774	45.224961	43.874749	1.030774	61.85725	28.49746	35.19547	0.00063	-0.00055	-0.10853	28.49746	77.10966	47.2547	0.00803
Br2K4O1	icsd_068505	K	Br	O	0	0	1	124	tetragonal	139	I4/mmm (139)	2.403334	32.789684	78.804569	7	0.9958	8	15.689043	15.670008	15.679526	9.104536	8.095284	8.59991	0.624572	21.811927	-0.553372	-0.553372	-0.622543	-1	0	0	17.058688	30.899626	20.151251	2.936176	0.145707	29.022112	24.477368	1.185671	33.19868	4.9341	8.11567	-0.00256	-0.00511	-0.00076	4.9341	33.19765	8.11466	-0.00598
Br2La2P1	icsd_418009	P	Br		0	0	1	122	trigonal	164	P-3m1 (164)	4.383444	35.50251	155.623271	5	0	4.8	17.16781	3.729657	10.448734	9.197748	1.611977	5.404862	27.132459	13.829959	-0.617213	0.154303	0.771517	-1	0	0	2.242647	44.323325	8.166667	10.484256	1.283786	3.777783	44.246076	0.085381	52.13769	19.77945	1.67894	0.10769	-0.00713	0.00813	19.77945	52.16251	1.71664	-0.15689
Br2Na4O1	icsd_067283	Na	Br		0	0	1	124	tetragonal	139	I4/mmm (139)	2.834965	22.405752	63.519517	7	1.9896	9	25.149444	25.148699	25.149072	14.909363	14.368503	14.638933	0.18824	36.780351	-0.523205	0.523205	-0.672692	0	-1	0	32.203183	44.844487	35.55329	2.904201	0.081686	40.94574	40.645735	1.007381	50.05705	11.04185	14.14815	0.02397	-0.02601	-0.0003	11.04185	50.08208	14.16147	0.01561
Br2O1Rb4	icsd_411954	Rb	Br	O	0	0	1	124	tetragonal	139	I4/mmm (139)	3.199306	38.384457	122.803627	7	0.5999	7.857143	13.102414	13.079504	13.090959	7.255945	6.223039	6.739492	0.831656	17.257049	-0.556022	0.556022	0.617802	0	-1	0	12.94397	25.756363	15.65881	2.647916	0.169101	24.055622	19.423811	1.23846	27.69546	3.87303	6.92383	0.00057	0.0003	0.00287	3.87303	27.69582	6.92231	0.00104
Br3Li7O2	icsd_067264	Li			0	0	1	237	tetragonal	139	I4/mmm (139)	3.079524	14.392564	44.322243	12	4.2556	9.583333	38.05715	36.978807	37.517978	25.957306	24.468331	25.212818	0.333427	61.795793	0	0	-1	-0.658145	0.658145	-0.365636	38.682257	72.28054	63.011281	7.626724	0.121037	38.682257	65.747985	0.588341	73.59185	23.70817	24.27911	0.03468	0.07184	-0.0077	23.70817	73.59159	24.27879	0.05063
Br5Pb2Rb1	icsd_151990	Rb			0	0	1	125	tetragonal	140	I4/mcm (140)	5.302632	35.205825	186.68354	16	3.0396	5.4375	13.689324	10.950123	12.319724	7.425147	6.197015	6.811081	1.241058	17.25363	0	-0.274721	-0.961524	-0.707107	0.707107	0	11.847182	31.812844	16.894346	4.889783	0.289433	11.875419	24.185255	0.491019	27.01265	16.28217	5.8071	-0.00783	0.0124	-0.00834	16.28217	26.99397	5.79428	-0.00435
Br6Mo6S3	icsd_035356	Br			1	0	0	366	orthorhombic	63	Ccmm (63)	4.836663	26.35301	127.460632	30	1.3926	5.6	23.726204	4.252433	13.989319	14.931801	1.167885	8.049843	63.506102	20.262914	-0.7396	-0.1849	-0.64715	0	0	-1	1.594864	89.916318	8.058641	14.516914	1.80141	4.468408	64.59472	0.069176	4.50941	0.71894	1.14254	-0.02237	0.00751	-0.11683	0.71894	87.95736	12.67548	0.00429
Br6Pb2Pd1	icsd_078874	Br			1	0	0	126	monoclinic	14	P2_1/c (14)	5.645789	32.687962	184.549328	18	1.6708	4.166667	12.385731	9.865167	11.125449	7.599641	5.821592	6.710616	1.782617	16.761748	-0.894427	0	-0.447214	-0.847998	0	0.529999	7.908346	25.560406	16.163389	4.096804	0.253462	11.392597	17.85844	0.637939	19.71536	3.5606	10.58055	-0.00219	-5.633	-0.01716	3.5606	17.06626	11.10374	-0.01054
Br7Mn2Rb3	icsd_032544	Br			0	0	1	237	tetragonal	139	I4/mmm (139)	4.147737	30.880437	128.083928	12	0	10.25	20.397553	18.030565	19.214059	8.539636	6.488872	7.514254	1.711493	19.942987	-1	0	0	-0.664364	0.747409	0	10.094992	34.972721	19.123018	4.908119	0.25666	26.043352	21.819567	1.193578	22.79297	20.91446	9.64989	0.01968	-0.01962	0.1764	20.91446	34.45939	15.90511	0.01529
C1Cl1La2	icsd_400894	La	C	Cl	0	0	1	112	trigonal	166	R-3m (166)	5.48179	24.632976	135.032789	12	0	6	59.698244	58.533291	59.115768	34.916855	32.101397	33.509126	0.458428	84.551652	0	0	-1	-0.777778	-0.444444	-0.444444	59.794422	112.303379	84.077962	12.250048	0.145699	59.794422	87.618878	0.682438	113.3544	35.45341	39.61707	9.65735	0.15354	0.47951	35.45341	113.4068	39.72039	-9.78025
C2B2La1	icsd_094035	La			0	0	1	122	tetragonal	127	P4/mbm (127)	5.17383	11.846178	61.290111	10	0	9.5	173.750941	146.253738	160.002339	97.896849	85.803741	91.850295	0.892706	231.292589	-0.6	0	-0.8	-1	0	0	168.222604	330.050411	219.761204	52.824235	0.240371	199.649808	328.011397	0.608667	404.51171	168.06412	52.36522	0.00739	0.00196	0.0001	168.06412	404.4865	52.33908	0.03138
C2B2La1	icsd_612631	La			0	0	1	122	tetragonal	131	P4_2/mmc (131)	5.112404	11.988511	61.290111	10	0	11.1	171.959086	144.43439	158.196738	111.198575	96.04453	103.621553	0.979476	255.154483	-0.452679	-0.362143	0.814822	-1	0	0	180.903217	425.507043	240.798591	60.465787	0.251105	202.111079	362.734907	0.557187	463.48455	121.80633	43.67793	-0.00611	-0.00085	-0.00351	121.80633	439.43703	51.76544	-0.00909
C2B2La1	icsd_654405	La			0	0	1	122	tetragonal	131	P4_2/mmc (131)	5.112404	11.988511	61.290111	10	0	11.2	171.955983	144.42885	158.192417	111.214722	96.051309	103.633015	0.979932	255.176401	-0.452679	-0.362143	-0.814822	-1	0	0	180.903088	425.632656	240.813589	60.482215	0.251158	202.108611	362.783091	0.557106	463.56564	121.7433	43.65243	-0.01082	-0.00089	-0.00374	121.7433	439.4957	51.77246	-0.00999
C2Cl1La2	icsd_419171	C	Cl		1	0	0	122	monoclinic	15	C2/c (15)	5.088989	22.011264	112.015078	10	0	6	46.28819	42.415741	44.351966	24.728634	21.849015	23.288825	0.750279	59.459291	-0.816497	0.08165	0.571548	-0.406138	0	-0.913812	38.68181	95.217995	57.987601	11.098827	0.1914	43.779942	64.124035	0.682738	56.95986	29.75215	24.27732	-1.14178	4.99976	0.16052	29.75215	86.2909	34.80936	2.34865
C2La1Ni1	icsd_618179	La			1	0	0	112	orthorhombic	38	C2mm (38)	6.46853	14.223055	92.002263	4	0	9.5	131.79752	126.760972	129.279246	74.769512	71.312238	73.040875	0.282137	184.395676	-0.995037	0.099504	0	0	-0.789352	-0.613941	134.700616	234.713824	185.983932	23.562488	0.126691	135.114047	209.750704	0.644165	174.39668	82.03351	81.23387	-0.02126	0.02327	1.59005	82.03351	263.80269	100.55515	-0.02823
C2La2O2	icsd_000462	La	C	O	0	0	1	222	monoclinic	12	C2/m (12)	5.159553	17.906575	92.389926	6	2.9665	3	89.077873	79.201617	84.139745	36.250372	29.31085	32.780611	1.308478	87.038512	-0.074125	-0.667124	-0.741249	-0.514496	0	0.857493	47.507022	124.872415	81.485655	20.609973	0.252928	80.19267	110.020352	0.728889	158.53462	71.72961	67.54223	0.03816	-1.88614	-0.00617	71.72961	153.2967	45.69211	-0.02107
C6Cl4La6	icsd_416906	La	C		1	0	0	466	monoclinic	14	P2_1/c (14)	4.904796	22.160674	108.693578	32	0	6.53125	48.187636	44.193513	46.190574	22.877517	20.001358	21.439438	0.809369	55.700486	-0.604708	0.604708	-0.518321	-0.124035	0	0.992278	35.552366	74.934578	53.080531	11.171874	0.21047	71.062514	60.262454	1.179217	94.33356	39.04627	26.24247	-0.08097	-7.55233	0.11491	39.04627	74.28264	25.02433	0.55359
Ca1Cd2P2	icsd_100063	Ca	Cd		0	0	1	122	trigonal	164	P-3m1 (164)	4.755684	22.825021	108.548598	5	0.825	5.6	57.423727	56.185488	56.804607	34.913342	34.445826	34.679584	0.089901	86.446667	0	-0.447214	-0.894427	-0.843274	-0.527046	-0.105409	76.216098	97.599424	85.887206	6.901847	0.080359	76.647347	96.88813	0.791091	114.91894	38.34959	30.40685	1.59553	-0.00195	0.00873	38.34959	114.8709	30.39979	-1.61722
Ca1Cd2Sb2	icsd_012151	Ca	Cd		0	0	1	122	trigonal	164	P-3m1 (164)	5.707934	29.58167	168.850226	5	0.1071	5.6	39.956798	39.425019	39.690908	19.578879	18.510324	19.044601	0.302126	49.255788	-0.581914	0.363696	-0.727393	-0.287348	0.957826	0	41.045402	60.283974	47.613113	6.341179	0.133181	53.571852	60.192599	0.890007	74.6584	29.00145	22.2322	0.01311	-0.02413	0.00131	29.00145	74.81533	22.27531	0.02872
Ca1Cl1F1	icsd_001130	Cl	F		0	0	1	111	tetragonal	129	P4/nmm (129)	2.969721	17.618913	52.323247	6	5.6717	11.333333	52.825907	46.750361	49.788134	26.918762	21.605489	24.262126	1.359569	62.615395	0	0	-1	0	-0.874157	0.485643	23.656431	78.179295	63.992478	13.857613	0.216551	23.656431	64.506263	0.366731	99.03264	33.03762	40.64586	-0.01136	-0.02169	0.00233	33.03762	99.04351	40.65528	-0.01164
Ca1Co2Ge2	icsd_000406	Ca	Co		0	0	1	122	tetragonal	139	I4/mmm (139)	6.214394	16.204827	100.703172	5	0	11.4	97.104921	94.897127	96.001024	63.393593	61.476541	62.435067	0.179182	153.934367	0	-0.196116	0.980581	-0.668965	0.743294	0	114.904518	180.609895	154.603344	16.376483	0.105926	116.416509	173.320016	0.671685	195.68253	57.53585	58.47445	-2.23369	1.82918	-0.19573	57.53585	194.48698	54.80838	4.31072
Ca1Co2P2	icsd_010462	Ca	Co		0	0	1	122	tetragonal	139	I4/mmm (139)	5.334994	13.688452	73.02781	5	0	11.6	119.434141	112.12161	115.777876	95.921787	92.051449	93.986618	0.275447	221.911729	0	0	-1	-0.601317	-0.601317	-0.526152	152.082657	257.573374	223.178124	21.964383	0.098416	152.082657	222.471871	0.683604	264.40844	73.48646	65.12348	-0.57968	-0.23006	7.11198	73.48646	249.84111	53.44794	-0.72017
Ca1Co2Si2	icsd_420974	Ca	Co		0	0	1	122	tetragonal	139	I4/mmm (139)	4.799189	14.816958	71.109382	5	0	11.6	116.187482	112.712842	114.450162	85.181215	82.028145	83.60468	0.223022	201.700622	0	0	-1	-0.707107	0.707107	0	146.34487	244.357295	203.877848	23.433538	0.114939	146.34487	224.677696	0.651355	239.32838	73.65231	62.73663	-4.00611	4.27836	-0.98042	73.65231	239.0821	61.68224	5.20321
Ca1Cr2O4	icsd_006131	Ca			1	0	0	124	orthorhombic	59	Pmmn (59)	4.288387	11.509644	49.357807	28	0.8959	5.142857	133.39257	132.879887	133.136228	67.741408	53.90545	60.823429	1.287212	158.35535	-0.707107	-0.707107	0	-1	0	0	88.308109	242.05215	143.005614	34.720486	0.242791	242.05215	205.473603	1.178021	274.36069	61.38998	79.18433	0.64457	0.02207	-2.30464	61.38998	266.90183	70.38	-0.20409
Ca1Cs2F4	icsd_082616	Cs	F		0	0	1	124	tetragonal	139	I4/mmm (139)	4.055947	22.33513	90.590104	7	6.0969	8.857143	33.182898	32.964562	33.07373	16.870125	15.217879	16.044002	0.549487	41.432411	-0.502519	-0.502519	-0.703526	-1	0	0	32.229454	59.272979	38.900472	6.265173	0.161056	46.682018	51.211215	0.911558	67.47957	16.99525	18.68594	-0.02255	-0.0159	0.00843	16.99525	67.48005	18.68736	-0.03971
Ca1Cu1Ge1	icsd_100071	Ca			1	0	0	111	orthorhombic	33	Pna2_1 (33)	4.974581	19.612586	97.564403	36	0	10.388889	58.89895	56.942969	57.92096	41.077384	39.177138	40.127261	0.27687	97.797333	-0.936329	0	0.351123	0	-0.5547	-0.83205	78.789496	129.316496	97.468009	13.350406	0.136972	79.425738	116.77147	0.680181	90.25733	32.1751	24.90454	-0.03945	0.07455	-0.0329	32.1751	110.86694	39.1869	-0.00606
Ca1Cu1Ge1	icsd_408580	Ca			1	0	0	111	orthorhombic	62	Pnma (62)	4.974571	19.612625	97.564403	36	0	10.305556	58.891479	56.863411	57.877445	41.060335	39.151797	40.106066	0.279401	97.741583	-0.936329	0.351123	0	0	-0.83205	-0.5547	78.550471	129.430058	97.420721	13.439203	0.13795	79.085848	116.891699	0.676574	89.82571	24.74023	32.13178	-0.07448	-0.0601	0.04764	24.74023	136.44502	39.39156	0.04655
Ca1Cu1O2	icsd_086544	Ca			0	0	1	112	tetragonal	123	P4/mmm (123)	4.724174	11.917794	56.30173	4	0	6	125.851932	112.256286	119.054109	60.322937	40.248763	50.28585	2.614875	132.239232	-0.894427	0	0.447214	-0.707107	-0.707107	0	78.163663	264.61872	118.139185	38.559446	0.32639	184.088098	159.759352	1.152284	232.01638	187.22696	26.67612	0.00455	0.00272	0.04967	187.22696	232.02324	26.66979	0.00454
Ca1Cu1P1	icsd_049740	Ca			0	0	1	111	hexagonal	194	P6_3/mmc (194)	4.009834	18.579721	74.501601	6	0.2284	10	74.151108	68.349161	71.250135	52.913027	49.938413	51.42572	0.382715	124.358123	0	0	-1	-0.099504	0.995037	0	90.748781	158.455359	123.065665	20.976567	0.17045	90.748781	158.373518	0.573005	175.54608	43.88374	32.09627	-0.0041	-0.01961	-0.06166	43.88374	175.56162	32.07954	-0.00685
Ca1Cu1Sb1	icsd_659589	Ca			0	0	1	111	hexagonal	194	P6_3/mmc (194)	5.262113	23.707769	124.752958	6	0	10	54.593804	46.899466	50.746635	30.964451	29.844508	30.40448	0.35169	76.029303	0	0	-1	-0.948683	0.316228	0	55.451004	95.264663	74.967402	9.317659	0.124289	55.451004	87.707862	0.632224	116.17163	51.73683	23.16197	0.02794	0.02137	-3.52769	51.73683	116.64675	23.41292	0.02681
Ca1Cu1Sn1	icsd_417715	Ca			0	1	0	111	orthorhombic	44	Im2m (44)	5.397573	22.800016	123.064743	18	0	10.555556	52.191968	50.990288	51.591128	33.499707	32.645063	33.072385	0.154466	81.748845	0	-0.995037	-0.099504	-0.707107	0	0.707107	68.720293	101.428237	82.28971	8.102551	0.098464	68.796777	91.37652	0.752893	101.61926	29.90948	39.54559	0.0158	0.58837	0.03158	29.90948	80.13474	26.00665	-0.4314
Ca1Cu2Ge2	icsd_081757	Ca	Cu		0	0	1	122	tetragonal	139	I4/mmm (139)	5.832568	17.790975	103.767068	5	0	11.6	73.732623	72.873147	73.302885	40.149778	35.677302	37.91354	0.63859	97.014715	-0.450835	0.631169	0.631169	0	-0.992278	0.124035	67.435167	127.92516	90.706662	13.385473	0.147569	117.50228	97.667744	1.203082	143.11332	19.22778	48.08368	6.55111	-5.02136	-0.15465	19.22778	143.46481	48.01706	-4.91892
Ca1Cu2O3	icsd_015094	Cu			1	0	0	123	orthorhombic	59	Pmmn (59)	4.720267	12.61564	59.54919	12	0	4.666667	73.374318	62.456346	67.915332	37.741985	29.381776	33.56188	1.597496	86.445914	0	-0.242536	0.970143	-0.485643	-0.874157	0	54.170147	165.527876	83.462548	26.603276	0.318745	59.378416	76.220511	0.779035	100.0102	67.81912	45.79592	0.05888	0.07767	0.0668	67.81912	190.70608	33.52074	0.06301
Ca1Cu2P2	icsd_041756	Ca	Cu		0	0	1	122	tetragonal	139	I4/mmm (139)	4.825569	15.768441	76.091707	5	0	11.6	85.692223	85.588092	85.640157	53.244004	45.70026	49.472132	0.826567	124.452124	-0.707107	0.707107	0	-0.936329	0	0.351123	75.940266	161.063627	118.288914	22.119823	0.186998	108.816521	104.744797	1.038873	179.29744	23.52187	56.56894	1.94446	-1.18132	0.03678	23.52187	178.77641	56.18353	-1.3267
Ca1Cu2Si2	icsd_025314	Ca	Cu		0	0	1	122	tetragonal	139	I4/mmm (139)	4.51781	16.417972	74.173278	5	0	11.6	85.511824	84.989765	85.250795	57.867159	56.020392	56.943775	0.170973	139.721955	-0.707107	-0.707107	0	0	-0.847998	-0.529999	110.435102	160.48022	138.00933	12.226364	0.088591	138.911862	125.472516	1.10711	165.42132	28.74199	53.25359	-2.80505	3.99922	-0.49484	28.74199	165.58719	53.20512	4.02492
Ca1Cu2Sn2	icsd_417717	Ca	Cu	Sn	1	0	0	122	monoclinic	12	C2/m (12)	6.178544	21.747433	134.367477	5	0	9.2	59.413307	58.067105	58.740206	33.770654	28.092641	30.931647	1.033771	78.938949	-0.640184	0	-0.768221	-0.274721	0	0.961524	45.16914	132.520286	74.190095	16.073384	0.216651	94.472853	91.430935	1.03327	110.27616	32.30739	33.14606	-0.0807	-1.90475	2.45479	32.30739	92.42718	33.2308	-0.44119
Ca1F3K1	icsd_181649	Ca			0	0	1	113	orthorhombic	62	Pbnm (62)	2.621286	17.252453	45.223615	20	6.6619	5.45	47.890314	47.858947	47.874631	24.734701	23.91275	24.323725	0.17252	62.402816	-0.874157	0	0.485643	-0.668965	-0.743294	0	52.619907	75.164294	61.985345	5.171809	0.083436	73.833087	66.239073	1.114646	75.58133	38.98925	28.08192	-0.00259	0.0141	0.06699	38.98925	80.75983	26.86744	-0.00377
Ca1Fe1O2	icsd_173438	Ca			0	0	1	112	tetragonal	123	P4/mmm (123)	4.570869	11.618091	53.104777	4	0	6	149.987158	122.108338	136.047748	89.401525	70.646432	80.023978	1.555704	200.717569	-0.268328	0.357771	0.894427	0	-1	0	125.032491	343.428157	189.350525	61.842649	0.326604	129.750279	315.833441	0.410819	381.90897	83.83546	67.26603	-0.00452	-0.00168	-2.24866	83.83546	381.96203	67.25738	0.00477
Ca1Fe1O2	icsd_246244	Ca			0	0	1	112	tetragonal	113	P-42_1m (113)	4.501742	11.796495	53.104777	8	0.1973	5	130.95707	110.239392	120.598231	84.596652	61.74293	73.169791	2.038649	182.583473	-0.436852	0.436852	0.786334	-0.707107	0.707107	0	108.59321	334.72744	168.610087	64.732722	0.38392	142.876526	311.499001	0.458674	325.63786	98.00602	44.51992	-0.00659	-0.07789	-1.56433	98.00602	325.24982	45.09203	0.03293
Ca1Fe2P2	icsd_010463	Ca	Fe		0	0	1	122	tetragonal	139	I4/mmm (139)	4.936639	14.377511	70.976583	5	0	11.6	111.382411	84.345262	97.863837	91.080463	77.12674	84.103601	1.22515	196.127267	0	0	-1	-0.707107	-0.707107	0	88.573822	287.758748	198.306051	56.331843	0.284065	88.573822	277.711336	0.318942	295.79935	64.96608	45.25386	0.89061	-2.86636	0.42473	64.96608	294.8497	45.59492	2.50059
Ca1Ga1Ge1	icsd_166384	Ca			0	0	1	111	hexagonal	194	P6_3/mmc (194)	4.45923	22.645941	100.983452	12	0	9.916667	48.920724	46.311254	47.615989	34.312531	32.472591	33.392561	0.339653	81.196865	0	0	-1	-0.65938	0.593442	-0.461566	48.561	91.458424	82.576199	9.822253	0.118948	48.561	84.631445	0.573794	101.05788	30.63766	29.15743	-0.02589	0.08202	-0.11611	30.63766	99.54373	29.2522	-0.0145
Ca1Ga1Sn1	icsd_619297	Ca			0	0	1	111	hexagonal	194	P6_3/mmc (194)	4.84053	26.130154	126.483793	12	0	9.75	43.504706	40.870403	42.187554	28.579907	27.646084	28.112996	0.233344	69.009997	0	0	-1	-0.742781	-0.557086	-0.371391	45.056219	75.68292	69.764519	7.472764	0.107114	45.056219	74.24417	0.606865	89.59662	29.57616	24.53822	0.01613	0.03523	0.09811	29.57616	89.52751	24.51693	0.01926
Ca1Ga2P2	icsd_422525	Ca	Ga		0	0	1	122	hexagonal	194	P6_3/mmc (194)	3.74313	21.424464	80.194566	10	0.1673	5.1	63.617136	63.499377	63.558256	47.275603	47.092748	47.184176	0.021269	113.472695	-0.362143	-0.452679	-0.814822	-0.874157	0.485643	0	108.071059	120.306948	112.905882	4.128079	0.036562	110.816143	120.167655	0.922179	132.6241	32.08975	30.36285	0.00547	-0.07155	-0.09529	32.08975	132.46244	30.28727	0.00524
Ca1Ge1Ni1	icsd_418852	Ca	Ge		0	0	1	111	tetragonal	129	P4/nmm (129)	4.890125	19.402044	94.878426	6	0	10.333333	60.508522	59.947478	60.228	35.277891	32.308173	33.793032	0.468951	85.405791	0	0	-1	-1	0	0	58.034671	106.28717	83.204208	9.86797	0.118599	58.034671	85.323561	0.680172	128.67	16.34137	42.88956	-0.10574	-0.11959	1.07948	16.34137	128.18856	42.89855	-0.48174
Ca1Ge1Zn1	icsd_052772	Ca			0	0	1	111	hexagonal	194	P6_3/mmc (194)	4.474831	22.029783	98.579545	6	0	10	55.381768	46.23332	50.807544	32.350427	27.095154	29.72279	1.167657	74.617729	-0.707107	0.707107	0	0	-1	0	48.489469	108.371211	68.433358	12.738064	0.186138	55.12765	68.907801	0.80002	128.56749	46.56592	21.84027	0.01483	0.03557	0.14016	46.56592	128.67655	21.89609	0.0125
Ca1Ge2Mn2	icsd_080505	Ca	Mn		0	0	1	122	tetragonal	139	I4/mmm (139)	5.864334	16.719636	98.049531	5	0	11.6	98.624294	98.418686	98.52149	57.402771	50.24878	53.825775	0.713946	136.600724	-0.9759	0.09759	0.19518	-0.549972	-0.549972	0.628539	85.557879	202.157344	137.461587	22.639289	0.164695	133.416415	117.416075	1.13627	145.18962	82.48729	65.83388	-4.16439	10.42467	-1.92095	82.48729	152.0987	62.16747	3.30325
Ca1Ge2Ni1	icsd_240342	Ge			0	1	0	112	orthorhombic	63	Cmcm (63)	5.452659	18.580698	101.314204	8	0	11	78.685232	75.535074	77.110153	44.533773	42.586602	43.560188	0.270318	109.972438	-0.749269	0.093659	-0.65561	0	-0.707107	0.707107	92.926412	140.525035	107.967786	12.925348	0.119715	116.432819	101.912319	1.14248	122.71653	45.94022	27.44581	-0.16909	-0.17346	0.32438	45.94022	156.06611	66.85384	-0.2451
Ca1Ge2Ni2	icsd_081755	Ca	Ni		0	0	1	122	tetragonal	139	I4/mmm (139)	6.028301	16.678647	100.543896	5	0	11.4	90.408211	90.361487	90.384849	47.135749	45.476242	46.305995	0.182976	118.654883	-0.631169	-0.631169	-0.450835	-0.990148	0.099015	-0.099015	101.220044	146.062688	115.112647	8.838685	0.076783	120.479798	124.920545	0.964451	171.53961	42.34298	58.70048	-5.59341	1.95597	-1.99219	42.34298	170.01145	58.55168	2.34739
Ca1Ge2Pd2	icsd_052759	Ca	Pd		0	0	1	122	tetragonal	139	I4/mmm (139)	6.833654	19.351966	132.244644	5	0	12.4	85.518568	83.26888	84.393724	27.171333	20.871049	24.021191	1.536353	65.818846	-0.464991	-0.348743	-0.813733	-0.989949	0	-0.141421	41.566573	103.428728	57.204699	11.603305	0.202838	63.851496	75.14305	0.849733	143.69995	31.32321	72.67046	3.02889	6.25136	-1.26727	31.32321	144.55485	72.68215	4.99067
Ca1Ge2Pt2	icsd_619327	Ge	Pt		0	0	1	122	monoclinic	4	P2_1 (4)	9.943986	19.221331	191.136649	10	0	11.2	107.305458	105.867022	106.58624	32.731523	28.425276	30.578399	0.771055	83.728294	-0.705346	-0.705346	-0.070535	-0.957826	0	-0.287348	49.159103	112.123143	79.132437	15.762564	0.199192	91.378525	70.745255	1.291656	160.0767	62.81801	90.70528	1.73294	4.01877	-1.31291	62.81801	156.27514	88.91921	-3.43224
Ca1Ge2Rh2	icsd_052760	Ca	Rh		0	0	1	122	tetragonal	139	I4/mmm (139)	7.157651	18.149845	129.910259	5	0	11.4	106.205781	104.052349	105.129065	55.892521	51.833517	53.863019	0.412238	138.017846	-0.137361	0.549442	-0.824163	-0.707107	0.707107	0	99.54884	189.492555	137.150281	21.143039	0.15416	112.315818	164.530797	0.682643	187.03539	79.83743	70.37962	-5.13362	3.61234	-1.21447	79.83743	188.6811	66.00218	4.69159
Ca1Ge2Ru2	icsd_052761	Ca	Ru		0	0	1	122	tetragonal	139	I4/mmm (139)	7.030862	18.303743	128.691091	5	0	12.4	105.997064	103.451369	104.724217	58.196911	53.254023	55.725467	0.488693	141.991134	-0.408248	-0.408248	0.816497	-0.668965	-0.743294	0	111.19735	185.313563	137.513811	23.810222	0.173148	121.847767	183.033777	0.665712	215.39916	59.60774	63.19324	-0.2459	-0.28877	0.84898	59.60774	215.52492	63.25801	-0.24884
Ca1Ge2Zn2	icsd_025319	Ca	Zn		0	0	1	122	tetragonal	139	I4/mmm (139)	5.28334	19.870998	104.98524	5	0	11.6	57.787817	57.577141	57.682479	35.036502	28.289835	31.663169	1.196078	80.29721	-0.667424	-0.572078	0.476731	0	-1	0	45.738829	120.486451	73.682577	16.820221	0.228279	83.53099	80.318389	1.039998	130.00637	13.73235	32.93165	4.1443	-5.061	-1.13808	13.73235	131.84882	32.83373	-0.8885
Ca1Hg1Sn1	icsd_602726	Ca	Sn		0	0	1	111	hexagonal	186	P6_3mc (186)	7.329263	27.14057	198.920369	6	0	8.5	44.512329	42.795148	43.653739	27.435231	26.600616	27.017924	0.197005	67.191785	0	0	-1	-0.572078	0.476731	0.667424	63.282134	67.682305	66.420913	1.104835	0.016634	63.282134	64.664035	0.97863	85.75382	40.97606	19.44612	0.00121	-0.00724	-0.00784	40.97606	85.83055	19.46425	-0.00187
Ca1In2P2	icsd_260562	Ca	In		0	0	1	122	hexagonal	194	P6_3/mmc (194)	4.354504	25.295044	110.147365	10	0.4509	5.2	53.599733	53.590877	53.595305	35.4487	34.98255	35.215625	0.066791	86.665286	-0.217643	-0.652929	-0.725476	-0.819232	0.573462	0	80.47045	94.16725	85.482377	4.63367	0.054206	91.39133	94.156783	0.970629	105.95023	27.97101	27.89053	0.00255	-0.01102	-0.00443	27.97101	105.93756	27.8892	-0.00073
Ca1Li1Pb1	icsd_409533	Ca			0	0	1	111	hexagonal	187	P-6m2 (187)	5.367188	26.217359	140.713503	9	0	11.333333	30.791826	30.426616	30.609221	27.034505	26.556581	26.795543	0.101985	62.228265	-0.534522	0.267261	0.801784	-0.986394	-0.164399	0	56.03834	70.578371	61.425349	4.957421	0.080706	59.987879	70.56374	0.850123	74.27415	14.22169	9.52415	6.00E-05	0.00012	0.00741	14.22169	74.2737	9.52446	-0.00034
Ca1Li1Sb1	icsd_052775	Ca			1	0	0	111	orthorhombic	62	Pnma (62)	3.768679	24.788885	93.421358	12	0.6367	9.916667	37.239366	34.588667	35.914016	28.035137	25.50578	26.770459	0.572475	64.327938	0	0	-1	0	-0.8	-0.6	37.607344	82.140635	64.897216	10.124191	0.156003	73.211321	63.832271	1.146933	78.54399	20.2032	11.20889	-0.00143	6.00E-05	-0.01626	20.2032	81.24754	31.34131	0.00457
Ca1Mg2N2	icsd_079123	Ca	Mg		0	0	1	122	trigonal	164	P-3m1 (164)	2.905387	13.339853	38.75744	5	2.0524	5.6	103.480959	101.94293	102.711945	79.915589	70.309474	75.112531	0.698218	181.173865	-0.755263	-0.419591	-0.503509	0	-0.868243	-0.496139	135.836906	251.477465	177.142459	29.973827	0.169207	151.22806	172.987505	0.874214	215.72545	60.40784	52.03451	-30.72124	-0.00971	-0.00194	60.40784	215.74584	52.06208	30.69027
Ca1Mg2Sb2	icsd_100045	Ca	Mg		0	0	1	122	trigonal	164	P-3m1 (164)	3.826141	28.835543	110.328854	5	0.794	5.6	40.237644	39.767994	40.002819	26.195977	25.846098	26.021037	0.079495	64.153024	0	0	-1	0	-0.894427	-0.447214	58.258313	71.517739	64.06635	3.585327	0.055963	58.258313	65.38971	0.89094	78.48176	27.2362	21.01664	-3.00878	0.0037	-0.00036	27.2362	78.49702	21.01963	3.01121
Ca1Mn1Si1	icsd_066949	Ca	Mn	Si	0	0	1	111	tetragonal	129	P4/nmm (129)	3.47917	19.584639	68.138297	6	0	10	48.921654	41.202311	45.061983	37.541781	31.622067	34.581924	1.123362	82.61263	0	0	-1	-0.63375	-0.724286	-0.271607	34.326432	112.661482	84.756173	19.154216	0.225992	34.326432	95.732368	0.358567	110.81701	26.39094	31.97143	-0.14256	0.76648	6.42892	26.39094	113.14071	26.35789	0.15241
Ca1Mn2O4	icsd_096244	Ca	Mn		1	0	0	124	orthorhombic	57	Pcmb (57)	4.998985	10.152777	50.753583	28	0.8235	3.464286	186.616646	186.226076	186.421361	90.666737	89.522585	90.094661	0.066	232.783689	0	-1	0	-0.638877	-0.574989	-0.511101	192.443933	249.827622	235.855305	11.443522	0.048519	222.290847	222.833007	0.997567	306.22226	132.609	132.9659	0.00789	-0.00096	0.03639	132.609	274.29217	134.36575	0.01124
Ca1Mn2P2	icsd_049017	Ca	Mn		0	0	1	122	trigonal	164	P-3m1 (164)	4.268467	16.486988	70.37417	5	0	5.6	103.213861	101.769715	102.491788	56.077045	38.180089	47.128567	2.357945	122.594862	-0.780399	-0.520266	-0.346844	0	-0.768221	-0.640184	59.056706	183.259659	110.059911	34.276903	0.311439	175.942245	83.311071	2.111871	180.66385	105.5989	44.03967	-19.31315	-1.74743	-1.96627	105.5989	180.20969	40.15136	24.3081
Ca1Mn2Sb2	icsd_164898	Ca	Mn		0	0	1	122	trigonal	164	P-3m1 (164)	5.987458	21.82492	130.675797	5	0	6.6	69.286429	54.985378	62.135903	39.284601	24.150646	31.717624	3.393328	81.316684	-0.696526	0.597022	0.398015	-0.78811	-0.472866	0.394055	33.72944	160.115276	71.716378	27.839777	0.388193	111.135817	67.90204	1.636708	152.82038	57.94814	33.65307	-17.39384	2.20018	18.16071	57.94814	106.4411	29.33584	21.65193
Ca1Mo1O3	icsd_172790	Mo			0	0	1	113	orthorhombic	62	Pbnm (62)	5.015772	12.185532	61.119849	20	0	5.55	169.036031	167.425682	168.230857	75.498793	64.258758	69.878775	0.88421	184.140572	-0.759257	0	-0.650791	-0.707107	-0.707107	0	117.762363	293.561272	177.309004	36.980157	0.208563	227.095729	222.912153	1.018768	255.60597	161.0182	89.87453	0.66516	-2.30836	-0.46172	161.0182	266.88863	110.36685	-0.08503
Ca1N1Ni1	icsd_069044	Ca			0	0	1	111	tetragonal	131	P4_2/mmc (131)	4.206589	14.839608	62.424136	6	0	4	111.779409	101.511163	106.645286	60.052105	44.163994	52.10805	1.899917	134.429565	-0.707107	0.707107	0	-1	0	0	86.522177	271.730194	114.471655	31.133808	0.271978	131.372677	143.168663	0.917608	290.47414	44.05559	47.95603	0.00073	0.02162	-0.00871	44.05559	290.46063	47.96579	-0.01308
Ca1Nb1O3	icsd_051202	Nb			0	1	0	113	orthorhombic	62	Pnma (62)	4.679462	12.844579	60.105719	20	0	4.65	157.222887	156.870967	157.046927	76.562102	69.572951	73.067526	0.504533	189.771587	0	-0.529999	0.847998	0	-1	0	141.314714	271.594797	185.298715	26.414781	0.142552	271.594797	204.500971	1.328086	247.88982	89.71539	138.3323	-0.0154	-0.00179	0.00356	89.71539	311.07658	83.18036	0.00535
Ca1Nb2O4	icsd_088779	Ca			0	1	0	124	orthorhombic	57	Pbcm (57)	5.200323	13.223654	68.767266	28	1.3818	5.142857	148.850076	144.694711	146.772393	88.208779	64.278182	76.243481	1.890205	194.970215	0	-0.707107	-0.707107	-0.768221	0	-0.640184	99.99948	297.262713	174.49027	56.950868	0.326384	255.703523	296.544157	0.862278	334.337	52.37936	103.93981	-0.09912	0.02594	0.00174	52.37936	267.10693	47.1921	-0.18515
Ca1Ni2P2	icsd_010461	Ca	Ni		0	0	1	122	tetragonal	139	I4/mmm (139)	5.154771	14.136135	72.868535	5	0	11.6	119.593879	119.503506	119.548692	76.456289	75.476226	75.966258	0.065682	188.064153	-0.704361	0.704361	-0.088045	0	-0.993884	0.110432	166.398773	208.614189	185.289795	9.330363	0.050356	196.223543	184.231237	1.065094	232.90759	52.98109	68.58648	1.46767	-2.81862	1.12041	52.98109	233.37816	68.82362	-2.29442
Ca1Ni2Si1	icsd_412411	Ca			0	0	1	112	hexagonal	194	P6_3/mmc (194)	4.604911	16.727438	77.028367	8	0	8.375	88.022956	78.116459	83.069707	42.990879	33.865764	38.428322	1.474065	99.88291	-0.667124	-0.074125	0.741249	-0.868243	-0.496139	0	65.328083	161.600861	91.29342	27.565706	0.301946	109.751645	151.823233	0.722891	192.29797	88.09609	27.83742	0.03119	0.06133	3.51526	88.09609	187.85649	31.93561	0.02899
Ca1Ni2Si2	icsd_020299	Ca	Ni		0	0	1	122	tetragonal	139	I4/mmm (139)	4.634413	15.309404	70.950106	5	0	11.6	106.238342	106.157899	106.19812	63.945271	62.427071	63.186171	0.122356	158.185838	0	0	-1	-1	0	0	142.033813	186.762945	155.497075	9.521519	0.061233	142.033813	163.136935	0.870642	213.50842	42.22121	66.80322	-0.80284	-0.11101	1.56255	42.22121	212.33189	67.39322	0.18048
Ca1Ni4O8	icsd_040470	Ca			0	0	1	148	trigonal	166	R-3m (166)	4.268971	12.053756	51.457133	13	0	5.538462	96.747957	80.684844	88.7164	49.095274	36.426362	42.760818	1.93806	110.524976	-0.596285	0.298142	0.745356	-0.496139	-0.868243	0	60.479951	218.960183	101.046699	37.575223	0.37186	101.561928	182.33452	0.557009	204.00586	88.40331	34.64845	-4.2231	1.46133	6.97403	88.40331	232.5167	38.81681	1.17804
Ca1O3Pt1	icsd_173278	Ca	O		0	1	0	113	orthorhombic	63	Cmcm (63)	7.986144	11.775357	94.039699	10	1.6902	5.4	151.479938	148.913796	150.196867	77.693307	68.53511	73.114209	0.685371	188.720294	-0.707107	0	-0.707107	-1	0	0	139.36215	295.704062	177.330537	28.104343	0.158486	155.903965	186.690924	0.835091	333.10385	88.21644	56.18123	0.01015	-0.01071	-0.00792	88.21644	210.12909	111.05419	0.00578
Ca1O3Rh1	icsd_164774	Ca	O		0	1	0	113	orthorhombic	63	Cmcm (63)	5.538213	11.452521	63.426504	10	0	5.5	158.771728	155.138495	156.955112	80.145925	72.926442	76.536183	0.518403	197.50531	0	-0.948683	-0.316228	-1	0	0	161.264663	302.326156	187.751179	26.688554	0.142149	161.954382	212.489541	0.762176	344.30079	93.59914	67.43946	0.01138	0.00172	0.12884	93.59914	215.62144	111.86844	0.00224
Ca1O3Rh1	icsd_164775	Rh			0	1	0	113	orthorhombic	62	Pnma (62)	5.455554	11.626043	63.426504	20	0	3.85	166.133069	163.636696	164.884882	66.032065	62.913985	64.473025	0.263061	171.115918	0	-0.485643	0.874157	0	-1	0	140.556603	215.478896	168.426002	18.764811	0.111413	215.478896	158.871527	1.356309	276.04843	117.63483	142.84554	-0.0271	0.00731	-0.00052	117.63483	275.03505	98.70484	-0.01625
Ca1O3Ru1	icsd_056698	Ru			0	1	0	113	orthorhombic	62	Pnma (62)	5.402968	11.626373	62.81692	20	0	4.5	167.968947	166.464445	167.216696	70.472606	67.114679	68.793643	0.259201	181.492065	0	-0.447214	-0.894427	-0.707107	0	0.707107	141.403717	217.776096	181.990852	19.349767	0.106323	207.138004	184.362022	1.123539	257.72578	127.03726	144.0532	-0.03863	-0.04069	0.00454	127.03726	276.43605	102.61904	-0.04196
Ca1O3Sn1	icsd_029204	Ca			1	1	1	113	trigonal	148	R-3 (148)	4.962823	13.837952	68.675301	10	2.941	5.4	124.663426	119.099695	121.88156	58.561321	54.881177	56.721249	0.381998	147.311762	-0.127	-0.635001	-0.762001	-0.766261	0.287348	0.574696	114.092946	184.907488	142.746868	18.11919	0.126932	129.176887	150.68246	0.857279	180.379	71.43565	83.56857	5.22898	-14.5314	-5.82682	71.43565	228.2567	88.53282	-5.09417
Ca1O3Sn1	icsd_151593	Sn			0	0	1	113	orthorhombic	62	Pbnm (62)	5.353599	12.827876	68.675301	20	2.3489	4.6	144.308857	143.694114	144.001485	78.946998	78.35296	78.649979	0.042186	199.609398	-0.819232	0	0.573462	0	-0.919145	0.393919	180.556734	213.399338	199.308873	9.705061	0.048694	202.281392	202.683434	0.998016	236.24265	101.44687	85.81599	0.00678	0.01404	-0.02357	101.44687	268.50703	87.35535	-0.00511
Ca1O3Ti1	icsd_038212	Ti			0	0	1	113	orthorhombic	59	Pnmm (59)	3.886053	11.617905	45.147791	40	2.6866	4.825	169.947711	169.92102	169.934365	102.737331	102.061169	102.39925	0.033282	255.814707	-0.707107	0	0.707107	-0.331295	-0.883452	-0.331295	232.943689	270.860032	254.501369	10.036439	0.039436	259.324778	263.082694	0.985716	308.81486	97.57962	103.64953	0.00942	2.17584	-0.00934	97.57962	314.16982	97.56011	0.00502
Ca1O3Zr1	icsd_167889	Zr			0	1	0	113	orthorhombic	62	Pcmn (62)	4.404354	13.520029	59.546987	20	4.2736	4.65	146.308484	145.586493	145.947489	85.769953	84.989318	85.379636	0.050885	214.342036	-0.857493	-0.514496	0	-0.485643	0	-0.874157	193.185883	236.131948	213.218828	10.59233	0.049678	229.960828	223.735314	1.027825	245.37518	78.84502	103.1719	-0.00293	0.01812	0.00337	78.84502	264.24014	79.54689	-0.00718
Ca1O5V2	icsd_082689	Ca	O		0	0	1	125	orthorhombic	59	Pmmn (59)	3.574726	12.888044	46.071233	16	0.0939	4.375	88.057884	68.844463	78.451174	46.411115	39.606466	43.00879	1.138117	109.090956	-0.124035	0	-0.992278	-0.768221	-0.640184	0	62.753233	177.998888	108.575425	28.529015	0.262758	62.766414	147.616843	0.425198	181.05893	90.43565	29.56589	0.09914	-0.00707	0.01053	90.43565	171.83915	58.47274	0.28118
Ca1O6Sb2	icsd_074539	Ca			0	0	1	126	trigonal	162	P-31m (162)	5.040234	13.895546	70.036803	9	2.6635	3.888889	109.657153	88.040312	98.848733	54.610104	49.16192	51.886012	0.79964	132.478563	-0.136083	0.272166	-0.952579	-0.492366	-0.86164	0.123091	91.521161	185.408949	129.047275	29.540555	0.228913	91.688391	179.667843	0.510322	236.59244	104.89092	49.48261	-0.00685	7.26175	0.00079	104.89092	236.62025	49.4656	0.00761
Ca1O6Ta2	icsd_024091	O			1	0	0	126	orthorhombic	62	Pnma (62)	7.187996	12.782094	91.87764	36	3.5283	4.388889	125.951558	123.828539	124.890049	80.984787	73.325688	77.155237	0.539411	191.93984	0	-0.447214	-0.894427	0	-1	0	155.181226	327.170337	183.159299	25.572539	0.139619	199.914839	196.524004	1.017254	241.68617	37.41692	90.13856	-0.00465	0.01213	-0.03293	37.41692	340.54807	49.23785	-0.0004
Ca1O7V3	icsd_241196	Ca	V	O	1	0	0	137	orthorhombic	62	Pnma (62)	3.36247	13.688409	46.026859	44	0.5265	3.840909	86.655111	58.974863	72.814987	33.965927	28.420856	31.193391	1.444885	81.886927	-1	0	0	0	0	-1	42.72975	146.741585	77.594363	18.922173	0.24386	42.72975	99.76587	0.4283	64.62493	62.90718	34.15975	-0.03211	0.93462	0.12347	62.90718	184.0755	77.73171	-0.05799
Ca1O9V4	icsd_002556	Ca	V		0	0	1	149	tetragonal	85	P4/n (85)	3.462109	13.287132	46.001503	28	0.5748	3.857143	83.875522	48.982986	66.429254	43.476211	33.678431	38.577321	2.166948	96.962378	0	0	-1	-0.948683	-0.316228	0	40.604521	186.826529	92.411772	30.30702	0.327956	40.604521	132.01515	0.307575	201.63512	76.26359	37.1618	-0.01437	-0.02092	23.70622	76.26359	201.57089	37.14181	0.00932
Ca1P2Pd2	icsd_036371	Ca	Pd		0	0	1	122	tetragonal	139	I4/mmm (139)	6.180838	16.918302	104.569283	5	0	11.6	113.486572	111.660287	112.573429	51.371423	50.590902	50.981163	0.093496	132.883782	-0.707107	0.707107	0	-0.348155	-0.348155	-0.870388	111.57095	148.221552	131.773662	9.228855	0.070036	140.27905	121.948672	1.150312	176.503	61.58083	85.77345	0.46996	-1.16271	0.40169	61.58083	176.76178	85.66557	-1.064
Ca1P2Rh2	icsd_050185	Ca	Rh		0	0	1	122	tetragonal	139	I4/mmm (139)	6.514314	15.693886	102.234897	5	0	11.4	144.14434	144.119425	144.131883	72.746586	71.603401	72.174994	0.08	185.552729	-0.953998	0.212	-0.212	-0.536895	0.59655	0.59655	158.30795	203.489602	186.40744	10.997049	0.058995	182.264597	182.623253	0.998036	228.68095	102.69648	98.63854	-1.68507	-4.74201	5.40413	102.69648	236.43812	94.29541	-0.54705
Ca1P2Ru2	icsd_602125	Ca	Ru		0	0	1	122	tetragonal	139	I4/mmm (139)	6.259414	16.13821	101.01573	5	0	12.4	121.889508	88.484929	105.187218	88.020521	74.308018	81.164269	1.300197	193.677773	0	0	-1	-0.707107	0.707107	0	90.83531	324.183643	196.335461	57.979508	0.295308	90.83531	273.801327	0.331756	280.01883	119.86795	49.2336	0.58811	0.07661	-0.40285	119.86795	279.65427	48.12931	0.34297
Ca1P2Zn2	icsd_100062	Ca	Zn		0	0	1	122	trigonal	164	P-3m1 (164)	3.987879	19.386213	77.309878	5	0.8722	5.4	68.230724	67.480575	67.855649	46.015625	44.159234	45.087429	0.221309	110.735758	-0.579324	-0.331042	-0.744845	-0.870063	-0.483368	0.096674	92.175451	132.506018	108.364004	12.321909	0.113709	107.536299	130.57665	0.823549	145.8939	36.97165	32.43889	-3.82599	-0.21127	0.1198	36.97165	145.63922	32.35006	3.6842
Ca1Pd1Si1	icsd_069790	Ca	Si	Pd	1	0	-1	111	monoclinic	14	P2_1/c (14)	4.879611	19.803674	96.634224	12	0	9.916667	66.996166	64.431055	65.71361	32.754659	28.429076	30.591868	0.800579	79.447171	-0.527046	0.843274	-0.105409	-0.768221	0	-0.640184	53.165203	113.987945	79.348375	14.787822	0.186366	81.68587	79.226876	1.031037	109.00215	31.53532	56.07349	0.27605	5.2173	0.13191	31.53532	91.62798	59.60572	0.32313
Ca1Pd2Si2	icsd_619506	Ca	Pd		0	0	1	122	tetragonal	139	I4/mmm (139)	5.79774	17.705322	102.650854	5	0	12.4	106.570462	105.496945	106.033704	37.965437	34.315462	36.14045	0.542002	97.359981	-0.650945	-0.650945	0.390567	-0.9759	-0.09759	-0.19518	75.093956	132.716194	91.741921	12.375417	0.134894	101.077073	100.108937	1.009671	171.89692	51.39848	85.76181	-3.66307	6.53264	1.16766	51.39848	171.34647	86.24883	6.83677
Ca1Pt1Si1	icsd_072641	Ca	Pt		1	0	-1	111	monoclinic	14	P2_1/c (14)	7.304654	19.94768	145.710894	12	0	9.916667	68.881472	64.389323	66.635398	39.921819	35.297431	37.609625	0.724826	94.962901	0	-1	0	-0.743294	0	-0.668965	59.770708	128.136175	95.571299	16.806449	0.175852	92.16807	96.790454	0.952243	116.88467	26.50132	48.85689	-0.00618	5.26491	0.00466	26.50132	93.71995	64.83114	-0.00257
Ca1Rh1Sn2	icsd_410775	Ca	Sn		0	1	0	112	orthorhombic	63	Cmcm (63)	6.978367	22.629748	157.918691	8	0	7.5	71.688592	68.738875	70.213734	39.791621	34.466312	37.128966	0.81545	94.6953	0	0	-1	-0.759257	0	-0.650791	57.556492	145.491277	94.053572	17.240629	0.183306	98.260593	104.123466	0.943693	136.6062	35.32567	76.4146	0.0311	0.07393	-0.69705	35.32567	111.49902	35.43216	0.0746
Ca1S3Zr1	icsd_023286	Zr			0	1	0	113	orthorhombic	62	Pnma (62)	3.301082	22.887502	75.553518	20	1.5192	4.6	69.170042	66.78389	67.976966	37.521139	34.537946	36.029543	0.467601	91.859354	0	-0.581238	0.813733	-0.894427	0	0.447214	63.709009	116.799333	89.802139	14.427662	0.160661	116.264964	100.656038	1.155072	145.84318	37.03734	53.96958	0.00429	-0.00772	-0.00388	37.03734	131.1834	34.08612	-0.00094
Ca1S4Sc2	icsd_027181	Sc			0	1	0	124	orthorhombic	62	Pnam (62)	2.853934	21.465803	61.261978	28	1.5997	5.678571	70.374957	69.224838	69.799897	36.163354	34.63042	35.396887	0.237942	90.835794	-0.874157	0	0.485643	0	0	-1	75.518887	117.887182	89.198589	10.485032	0.117547	102.0331	86.625765	1.177861	101.15266	49.82415	38.99275	0.00426	-0.00145	-0.05624	49.82415	131.06337	42.71022	0.00248
Ca1Sb2Zn2	icsd_012150	Ca	Zn		0	0	1	122	trigonal	164	P-3m1 (164)	5.251966	26.201904	137.611506	5	0	5.6	44.901214	44.203176	44.552195	20.709261	15.373581	18.041421	1.751132	47.687273	-0.630488	-0.315244	-0.709299	-0.529999	-0.847998	0	28.92426	74.041775	42.583056	13.847119	0.325179	60.928732	73.392915	0.830172	86.931	30.12797	24.48399	-1.35088	-0.29728	0.18042	30.12797	88.41859	24.25944	1.53186
Ca1Si1Zn1	icsd_052791	Ca			0	0	1	111	hexagonal	194	P6_3/mmc (194)	3.481219	21.23338	73.918054	6	0	9.833333	60.242052	51.055215	55.648633	38.058259	35.620617	36.839438	0.522107	90.539289	0	0	-1	0	-1	0	59.921655	119.361024	87.792569	11.562778	0.131706	59.921655	96.789996	0.619089	139.68996	47.41879	25.10445	-0.03032	0.03114	0.05152	47.41879	140.01249	25.35478	-0.03169
Ca1Si2Zn2	icsd_059649	Ca	Zn		0	0	1	122	tetragonal	139	I4/mmm (139)	4.104088	18.369845	75.39145	5	0	11.6	70.280989	69.540952	69.91097	41.405779	37.531342	39.468561	0.526802	99.652575	-0.707107	-0.707107	0	0	0	-1	69.256522	149.408944	95.896707	16.80323	0.175222	149.408944	82.357366	1.814154	121.106	43.45584	34.74971	-1.44218	1.5872	-0.37443	43.45584	121.25642	34.8184	1.58421
Ca1Sn1Zn1	icsd_106358	Ca	Sn		0	0	1	111	hexagonal	186	P6_3mc (186)	5.144329	24.119743	124.079886	6	0	8.666667	47.863824	45.848616	46.85622	34.672905	32.628698	33.650801	0.357206	81.453266	0	0	-1	-0.780869	0	0.624695	62.624184	87.775155	80.908203	5.457363	0.067451	62.624184	74.228212	0.843671	94.93357	39.32561	22.99902	0.03284	-0.0208	0.05214	39.32561	94.85184	22.92877	0.02845
Ca2Cd1Sb2	icsd_173172	Ca			0	0	1	122	orthorhombic	62	Pnma (62)	4.781833	30.287105	144.827875	20	0.4188	7.55	34.562334	23.414721	28.988528	22.213811	18.007011	20.110411	1.644195	49.00016	-1	0	0	-0.16169	-0.808452	-0.565916	18.501343	70.277179	50.319259	14.793028	0.293983	53.204842	44.6917	1.190486	24.80058	20.81743	15.71626	-0.00374	-0.00832	-0.01222	20.81743	86.03768	29.94807	-0.00374
Ca2Cl1N1	icsd_062555	Cl			0	0	1	112	trigonal	166	R-3m (166)	2.786704	19.308822	53.807974	4	2.3791	6	59.280046	58.639695	58.95987	39.293457	37.704135	38.498796	0.221682	94.851459	-0.616316	-0.35218	0.704361	-0.870063	0.483368	0.096674	78.845303	112.669739	92.499803	10.247097	0.11078	98.428199	111.34088	0.884026	125.37589	35.61984	26.15248	3.04192	0.02384	-0.00575	35.61984	125.35719	26.15786	-3.0571
Ca2Ge1O4	icsd_016258	Ca	Ge	O	0	0	1	124	tetragonal	139	I4/mmm (139)	4.266288	12.054446	51.42774	7	2.9445	4.571429	136.666729	133.904704	135.285716	84.336309	83.750919	84.043614	0.055575	208.87721	-0.707107	0.707107	0	-0.6	0	-0.8	195.299012	219.028523	209.302184	8.041717	0.038422	210.999714	195.707654	1.078137	232.23507	58.50744	94.17383	0.0134	0.00231	0.01203	58.50744	232.13809	94.13606	-0.00072
Ca2Ge2Ni3	icsd_421074	Ca			0	0	1	223	orthorhombic	51	Pmma (51)	5.270291	18.072551	95.247603	14	0	10	74.802468	72.397419	73.599943	39.824879	28.459783	34.142331	2.029914	88.709779	-1	0	0	-0.514496	-0.857493	0	33.267059	135.692986	87.152362	22.212531	0.25487	65.036503	87.776459	0.740933	82.9398	68.34848	59.81769	-1.54938	-0.25762	0.06203	68.34848	155.28174	34.06745	1.37262
Ca2I1P1	icsd_065217	P	I		0	0	1	112	trigonal	166	R-3m (166)	3.293271	30.005512	98.816268	4	1.6967	6	33.917689	33.212645	33.565167	21.376055	20.402754	20.889405	0.25975	51.901238	-0.544949	0.3114	-0.778499	0	-0.993884	0.110432	42.605921	63.346726	50.886999	6.545291	0.128624	46.84199	62.388566	0.75081	71.37454	19.70967	17.40133	1.90103	0.01569	0.00419	19.70967	71.36776	17.40178	-1.91168
Ca2Mn1O4	icsd_099523	Ca	O		0	0	1	124	tetragonal	142	I4_1/acd (142)	4.030987	11.716358	47.228485	28	0	5.642857	145.589154	144.393205	144.99118	69.832627	65.313265	67.572946	0.354258	175.461043	-0.099015	0.099015	0.990148	-0.633724	0.633724	0.443607	126.109347	200.572018	176.015157	14.744455	0.083768	128.417316	172.128467	0.746055	223.36303	82.36175	115.43731	4.0692	-3.21082	1.13882	82.36175	222.8716	122.80226	3.33899
Ca2Mn3O8	icsd_024847	Ca			1	0	0	238	monoclinic	12	C2/m (12)	4.059538	11.735391	47.640262	13	0	4.461538	135.994308	132.617828	134.306068	50.745495	34.324079	42.534787	2.417573	115.419856	-0.635999	-0.741999	0.212	-0.101015	-0.909137	-0.404061	42.758297	181.028572	103.945154	35.479916	0.341333	152.417781	128.174302	1.189145	194.16668	72.34948	91.23722	-3.72557	1.84533	2.08783	72.34948	236.6549	125.73442	10.64058
Ca2Ni7P4	icsd_094448	Ni			0	1	0	247	orthorhombic	31	Pmn2_1 (31)	5.877835	13.362762	78.544104	26	0	11.461538	125.104306	124.872399	124.988353	63.464077	61.81786	62.640969	0.135008	161.022744	0	-0.743294	-0.668965	-0.613941	0	0.789352	137.07553	189.475109	160.16932	11.765679	0.073458	162.358386	173.580119	0.935351	204.40645	95.48036	87.24681	-0.06061	-0.21162	-0.20316	95.48036	210.77027	66.57551	-0.05288
Ca2O4Ru1	icsd_056583	Ca	O		0	0	1	124	orthorhombic	61	Pbca (61)	4.495948	12.938739	58.1719	28	0.1492	4.571429	131.326969	121.584702	126.455835	47.149249	34.035372	40.592311	2.006635	110.006265	0	-1	0	-0.511101	0.574989	-0.638877	43.771485	164.994456	112.162758	29.286349	0.261106	77.400076	79.43817	0.974344	141.9612	103.62812	116.13368	-0.15496	0.17146	-0.10857	103.62812	137.51412	129.26932	-0.11773
Ca2O4Ru1	icsd_056584	Ca			0	0	1	124	monoclinic	14	P2_1/c (14)	4.436705	13.111509	58.1719	28	0.5378	4.464286	126.829099	124.512293	125.670696	49.343173	44.704722	47.023948	0.537395	125.427524	-1	0	0	-0.398015	0.199007	-0.895533	74.217159	151.181099	127.855718	18.518881	0.144842	146.571394	108.42426	1.351832	148.81097	109.27653	93.24	0.0046	0.01646	0.0733	109.27653	174.32801	99.14697	-0.00671
Ca2O4Si1	icsd_040657	Ca	O		0	0	1	124	tetragonal	139	I4/mmm (139)	3.75583	10.878695	40.858529	7	4.3625	8	155.021743	154.143938	154.582841	102.849764	99.678986	101.264375	0.164744	249.345835	-1	0	0	-0.639602	0.639602	0.426401	211.216244	274.210324	252.361202	15.328199	0.060739	223.053081	243.48724	0.916077	259.71783	86.16626	104.34231	-0.00338	-0.01153	-0.01445	86.16626	259.74017	104.35434	-0.00373
Ca2O8Pt3	icsd_065412	Ca	Pt		0	0	1	238	trigonal	166	R-3m (166)	7.465239	13.575502	101.344368	13	1.6607	4.615385	125.06302	119.195092	122.129056	49.678218	44.201558	46.939888	0.668739	124.827343	0	-0.707107	0.707107	0	-0.995037	-0.099504	89.331262	171.053421	118.933607	24.587226	0.206731	124.332879	166.258483	0.747829	228.08714	102.83934	76.11858	-6.53859	-0.00433	-0.00044	102.83934	228.05331	76.08684	6.57462
Ca2Pd3Sb4	icsd_416139	Ca	Sb		0	0	1	234	tetragonal	139	I4/mmm (139)	6.864812	23.825118	163.554952	18	0	10.444444	59.56771	59.252116	59.409913	19.636056	17.011679	18.323867	0.776672	49.84683	-0.630488	0.315244	-0.709299	-0.123091	-0.984732	0.123091	31.090889	67.561317	46.918821	9.501141	0.202502	55.652898	61.035732	0.911808	96.15578	43.83806	43.08678	4.5031	-1.58906	1.46697	43.83806	96.8797	42.83174	-2.01602
Ca3Ga2N4	icsd_170442	Ca			1	0	0	234	monoclinic	15	C2/c (15)	4.164765	13.986208	58.249265	18	1.9486	5.333333	106.189216	104.26516	105.227188	67.114581	60.946363	64.030472	0.52449	159.699227	-0.164399	0	0.986394	-0.46569	-0.698535	-0.543305	121.106264	227.546444	159.473808	26.702543	0.167442	139.141857	147.773063	0.941591	186.92756	70.61784	72.44636	0.07989	-8.66294	-0.0607	70.61784	196.21948	62.15093	0.05615
Ca3Ga2P4	icsd_423781	Ca			1	0	0	234	monoclinic	15	C2/c (15)	3.136358	22.564784	70.771249	18	0.9917	5.277778	56.477072	54.451936	55.464504	33.918821	31.569562	32.744192	0.409268	82.080204	-0.268328	0.357771	0.894427	0	-1	0	58.33921	112.238573	81.003302	12.63807	0.156019	85.346699	76.275205	1.118931	103.31679	29.06456	36.18123	0.02231	1.90922	-0.02907	29.06456	127.52259	32.31029	-0.00287
Ca3Mn2O7	icsd_096697	O			1	0	0	237	orthorhombic	63	Cmcm (63)	4.220484	11.216724	47.340008	24	0	3.458333	155.985327	152.997329	154.491328	73.193348	64.396883	68.795115	0.702518	179.710298	-0.993884	0	0.110432	-0.668965	-0.594635	-0.445976	106.795962	219.650004	181.701126	25.533453	0.140524	108.455431	157.84457	0.687103	231.51654	145.41431	127.24626	1.8124	9.06234	1.78043	145.41431	217.39738	84.92733	0.31206
Ca3Mn2O7	icsd_098090	O			0	0	1	237	tetragonal	139	I4/mmm (139)	4.203512	11.262014	47.340008	12	0	5.583333	159.537277	159.41806	159.477669	69.713436	37.765863	53.739649	4.230437	144.9388	-1	0	0	-0.545455	0.545455	0.636364	42.707815	216.318073	144.916696	54.396145	0.375361	210.023809	108.611161	1.933722	199.4474	178.83975	103.21017	0.10461	-0.49023	1.37266	178.83975	205.5733	100.86451	0.2481
Ca3Ni3Si2	icsd_412410	Ca	Si		0	0	1	233	orthorhombic	62	Pnma (62)	3.561576	20.542708	73.164418	32	0	8.9375	52.479741	50.329154	51.404448	33.478383	29.066905	31.272644	0.801579	78.000377	-1	0	0	0	-1	0	48.82559	121.19439	76.971454	13.371028	0.173714	55.579378	81.710132	0.680202	71.26984	31.85965	38.53485	-0.15308	-0.15615	-0.30805	31.85965	136.17848	23.66246	-0.15756
Ca3O7Ru2	icsd_153770	O			0	0	1	237	orthorhombic	36	Cmc2_1 (36)	4.807555	12.502681	60.107325	24	0.2993	5	139.820876	135.072162	137.446519	52.279945	49.526892	50.903419	0.313092	135.929701	-1	0	0	-0.441129	-0.51465	-0.735215	90.137145	158.793595	138.606034	15.829749	0.114207	149.447583	120.435445	1.240894	160.93173	108.65988	106.27517	0.34587	-1.45946	1.05813	108.65988	192.22687	118.53511	0.53743
Ca3O7Ti2	icsd_086241	O			0	0	1	237	orthorhombic	36	Cmc2_1 (36)	3.668295	12.3717	45.383051	24	2.7604	5.041667	146.585279	146.226547	146.405913	78.054693	76.713827	77.38426	0.089847	197.377516	0	0	-1	-0.59655	-0.59655	0.536895	167.198431	215.970248	200.614988	11.011639	0.054889	167.198431	191.888643	0.871331	234.19409	106.95718	97.30254	-0.05411	-0.01369	0.03249	106.95718	244.71977	103.2693	-0.04415
Ca4Ge3Ni4	icsd_421432	Ca			0	1	0	344	orthorhombic	63	Cmcm (63)	4.755121	19.460733	92.538143	22	0	8.363636	68.626232	67.322835	67.974533	30.579259	28.148801	29.36403	0.451076	77.003896	-0.127	0.762001	-0.635001	-0.874157	0	0.485643	60.401584	105.114021	74.924539	12.677233	0.1692	68.869404	97.718383	0.704774	129.93687	42.41073	48.93968	-0.02378	-0.05698	-1.38208	42.41073	93.72689	48.46264	0.00642
Ca4In2N1	icsd_062535	In			0	0	1	124	tetragonal	141	I4_1/amd (141)	3.790247	25.282274	95.826064	14	0	11.214286	43.651663	43.457744	43.554704	34.619738	32.926852	33.773295	0.26153	80.510105	0	0	-1	-0.59655	-0.59655	-0.536895	54.571335	91.284629	82.083105	7.517299	0.091582	54.571335	78.077208	0.698941	85.64901	21.35566	27.48769	0.1336	-0.09953	-0.00679	21.35566	85.74622	27.53558	-0.05904
Ca4O1P2	icsd_068202	Ca	P	O	0	0	1	124	tetragonal	139	I4/mmm (139)	2.585062	21.86398	56.51974	7	1.2668	6.571429	62.187102	62.167132	62.177117	45.153463	44.169434	44.661449	0.111714	108.101468	-0.556022	-0.556022	-0.617802	-1	0	0	98.978619	128.653909	105.547916	6.213891	0.058873	110.945779	113.230322	0.979824	137.44824	20.48105	30.31441	0.00151	-0.00028	0.00287	20.48105	137.44299	30.30993	0.00136
Ca4O1P2	icsd_402952	Ca	P	O	0	0	1	124	tetragonal	139	I4/mmm (139)	2.585122	21.863473	56.51974	7	1.2667	6.857143	62.192033	62.172092	62.182062	45.150582	44.165245	44.657913	0.111872	108.096225	-0.556022	-0.556022	0.617802	-1	0	0	98.968245	128.661954	105.540141	6.218164	0.058918	110.955346	113.236406	0.979856	137.45719	20.48268	30.31745	0.00287	0.00846	0.00367	20.48268	137.45185	30.31298	0.00359
Ca4O1Sb2	icsd_016353	Ca	Sb		0	0	1	124	tetragonal	139	I4/mmm (139)	3.846764	25.889899	99.592332	7	0.907	6.857143	49.795697	49.658939	49.727318	33.721756	32.848397	33.285076	0.135692	81.639944	-0.573462	0	-0.819232	-0.707107	-0.707107	0	72.941833	94.397736	80.65885	6.805253	0.084371	76.445162	92.700076	0.82465	101.59414	24.40855	27.03236	-0.00081	-0.00208	0.00551	24.40855	101.58577	27.02838	0.00399
Ca4O8Ru2	icsd_261486	Ca	O		0	0	1	248	orthorhombic	61	Pbca (61)	4.495876	12.938948	58.1719	28	0.1489	5.142857	131.196976	121.228683	126.21283	47.151537	34.0737	40.612619	2.001279	110.035492	0	-1	0	-0.511101	0.574989	-0.638877	43.666646	164.8748	112.212069	29.238068	0.260561	77.548863	79.424481	0.976385	142.71321	103.30278	116.60105	-0.15392	-0.09583	-0.39065	103.30278	136.34606	128.64726	-0.17496
Cd1Cl4Cs2	icsd_016576	Cs	Cl		0	0	1	124	tetragonal	139	I4/mmm (139)	3.480864	35.44015	123.362352	7	3.1591	8	16.816719	16.777006	16.796862	7.753105	6.733555	7.24333	0.759434	18.999003	-0.514496	0.514496	-0.685994	-1	0	0	13.730572	27.062006	17.466575	3.062463	0.175333	25.057046	23.274494	1.076588	31.26898	7.34924	10.76538	0.02141	0.01199	-0.00694	7.34924	31.26514	10.76418	0.01987
Cd1Cl4Rb2	icsd_051168	Rb	Cd	Cl	0	0	1	124	tetragonal	139	I4/mmm (139)	3.049338	33.074738	100.856049	7	3.1839	7.857143	18.961804	18.851074	18.906439	8.456373	7.465765	7.961069	0.669308	20.943585	-0.57735	0.57735	0.57735	0	-1	0	16.186123	30.256747	19.222592	2.904591	0.151103	28.187973	22.830508	1.234663	34.96581	7.50637	12.52645	0.00084	0.00239	-0.00513	7.50637	34.98389	12.53134	0.00145
Cd1Ge1O3	icsd_030971	Cd			0	0	1	113	trigonal	148	R-3 (148)	6.51133	11.886581	77.397447	10	1.4311	5.2	150.838924	144.961802	147.900363	59.510027	44.19619	51.853108	1.773026	139.282126	-0.529813	-0.529813	0.662266	-0.698535	-0.698535	-0.15523	77.068923	218.971215	124.414055	38.607836	0.310317	176.053546	194.358515	0.905819	279.86317	127.72094	83.17001	11.60957	-11.17471	-0.01967	127.72094	279.72278	83.10362	-11.44092
Cd1Ge1O3	icsd_158753	Ge			0	0	1	113	orthorhombic	62	Pbnm (62)	7.167714	10.798066	77.397447	20	0.8504	4.75	177.368928	177.078893	177.22391	93.406203	91.469563	92.437883	0.1075	236.240276	-0.668965	-0.743294	0	0	-0.780869	-0.624695	202.172196	264.628901	235.054249	15.035852	0.063968	209.077675	221.682407	0.943141	321.9699	107.22192	117.55344	-0.00595	0.00325	-0.04512	107.22192	304.41226	121.55774	0.0069
Cd1In1S2	icsd_052810	Cd	In		0	0	1	112	trigonal	164	P-3m1 (164)	5.471515	22.105985	120.95323	4	0	6	61.878669	60.230252	61.05446	24.603945	19.249116	21.92653	1.418297	58.746977	-0.707107	0.424264	-0.565685	0	0	-1	34.466965	121.845662	52.945624	12.863997	0.242966	121.845662	57.8635	2.105743	89.18188	45.05136	36.73484	6.62375	-0.00552	-0.0066	45.05136	88.60571	36.76736	-6.32945
Cd1K1Sb1	icsd_620064	K	Cd		0	0	1	111	tetragonal	129	P4/nmm (129)	4.548355	33.255559	151.25809	6	0	11	21.845181	21.342328	21.593755	9.380999	8.952545	9.166772	0.262853	24.091311	-0.83205	0	0.5547	-0.707107	0.707107	0	20.752013	31.084196	23.857695	2.478691	0.103895	26.668761	26.659965	1.00033	35.68847	21.61488	12.47443	-0.00275	0.00574	-0.00136	21.61488	35.68948	12.47498	0.01102
Cd1Na2Sn1	icsd_102034	Na			0	0	1	112	hexagonal	194	P6_3/mmc (194)	4.055305	28.366315	115.034048	8	0	10.5	24.08438	22.13494	23.10966	13.552634	11.726483	12.639559	0.866714	32.071612	-0.707107	0.707107	0	0	-1	0	23.422809	46.70629	29.265693	4.31433	0.147419	36.148853	31.15337	1.160351	52.62944	22.2184	6.49362	0.00113	0.00683	0.21821	22.2184	56.48594	6.48612	-0.00582
Cd1O3Sn1	icsd_180400	Cd	Sn		1	1	1	113	trigonal	148	R-3 (148)	6.805508	13.620975	92.697651	10	0.977	4.7	133.648374	125.608531	129.628453	46.636145	38.37424	42.505193	1.140498	114.951385	-0.811107	0.324443	-0.486664	-0.182574	0.912871	-0.365148	72.200362	170.166106	109.632294	28.702195	0.261804	93.824498	127.751345	0.734431	163.34179	100.5601	93.27803	13.0948	-6.78522	-6.90544	100.5601	211.83226	104.6798	-17.31211
Cd1O3Ti1	icsd_262708	Cd			1	1	1	113	trigonal	148	R-3 (148)	5.554226	12.453607	69.170141	10	3.005	4.7	152.738937	145.977959	149.358448	53.565522	43.267598	48.41656	1.236342	131.085321	-0.685994	-0.514496	0.514496	0	-0.242536	0.970143	79.038128	194.413293	123.289366	32.165879	0.260897	106.842368	138.420465	0.771868	192.56839	111.42273	109.25156	16.79247	-8.61143	-2.15967	111.42273	247.7458	115.80897	-16.0979
Cd1O3Ti1	icsd_262710	Ti			0	0	1	113	orthorhombic	62	Pbnm (62)	5.99127	11.545156	69.170141	20	2.439	3.85	184.425788	184.368965	184.397376	86.710963	86.073445	86.392204	0.037342	224.168189	0	-1	0	0	0	-1	207.535703	244.487508	223.452697	8.023097	0.035905	244.487508	230.150026	1.062296	305.8101	140.42595	112.88136	-0.00968	0.01104	0.01649	140.42595	291.30211	123.61674	-0.00557
Cd1O4W1	icsd_067913	Cd			1	0	0	114	monoclinic	13	P2/c (13)	7.564948	13.179355	99.701129	12	3.0861	3.916667	120.035813	115.983007	118.00941	43.868278	36.399661	40.13397	1.060862	108.142472	-0.635999	-0.741999	-0.212	-0.447214	0	-0.894427	61.01897	172.106945	103.592774	25.913538	0.250148	110.03329	120.76222	0.911157	177.79428	88.04564	99.09819	-0.00299	5.41332	-0.07868	88.04564	146.34017	82.29383	-0.00713
Cd1O6Sb2	icsd_181929	Cd			0	0	1	126	trigonal	162	P-31m (162)	6.192504	13.465078	83.382553	9	1.4214	3.888889	121.651071	99.800535	110.725803	50.406745	43.804892	47.105818	0.972494	123.766258	-0.573462	0	-0.819232	-0.957826	0.287348	0	87.49246	179.953856	118.190602	30.467448	0.257782	99.13999	179.930814	0.55099	247.75243	120.50363	59.94218	-0.03826	-1.16469	-0.01911	120.50363	247.7131	59.92633	-0.03103
Cd1O6V2	icsd_249319	Cd			0	0	1	126	orthorhombic	60	Pnab (60)	4.928081	11.617082	57.249916	36	2.2524	3.277778	126.486636	114.569007	120.527821	47.974065	40.492533	44.233299	1.027838	118.235846	0	-0.780869	-0.624695	-0.780869	0	0.624695	68.065543	166.544336	115.077079	28.935622	0.251446	136.723382	125.890558	1.08605	231.82777	89.4926	110.56555	-0.01777	-0.10955	-0.01521	89.4926	130.39128	84.27111	-0.04088
Cd1O7V3	icsd_072603	V	Cd	O	1	0	0	137	orthorhombic	62	Pnam (62)	4.208317	13.5318	56.946109	44	0.2875	3.818182	88.497162	61.430763	74.963963	25.707263	20.987885	23.347574	1.56491	63.45502	-0.658145	0.365636	-0.658145	-0.089087	-0.890871	0.445435	35.044607	108.533995	59.441423	14.495926	0.243869	44.977164	74.468764	0.603974	64.35197	46.9818	52.02134	4.45168	0.14606	1.32346	46.9818	155.79338	107.95171	-10.10696
Cd1S2Tl1	icsd_020320	Tl	Cd		0	0	1	112	trigonal	164	P-3m1 (164)	6.737297	23.471563	158.134893	4	0	6	51.916252	51.136108	51.52618	17.900325	12.885559	15.392942	1.961143	41.996783	-0.404226	0.646762	-0.646762	0	0	-1	20.640861	95.599134	36.285748	10.688299	0.294559	95.599134	47.768564	2.001298	75.87976	40.0411	30.8428	0.38548	-0.94986	-0.36036	40.0411	75.69563	30.91815	-0.74183
Cd2Ge2Sr1	icsd_025331	Sr	Cd		0	0	1	122	tetragonal	139	I4/mmm (139)	6.135078	24.777685	152.013026	5	0	11.6	47.337924	47.111141	47.224533	25.008471	22.251251	23.629861	0.624379	60.756032	-0.601317	-0.601317	-0.526152	0	-1	0	45.899164	85.564698	56.06249	8.197056	0.146213	83.468475	63.960594	1.304998	93.9168	16.2227	27.14332	-0.25211	0.02833	-0.22132	16.2227	94.06557	27.20326	0.0032
Cd2I1P3	icsd_100816	P			0	0	1	123	monoclinic	9	Cc (9)	4.959273	24.813947	123.059141	12	1.1259	3.833333	45.387914	44.122469	44.755192	25.426773	24.451202	24.938988	0.228174	63.097077	-0.668965	0	-0.743294	-0.698535	0.698535	0.15523	48.756671	78.919195	62.591799	7.198994	0.115015	63.953972	70.382689	0.908661	83.04527	39.15852	20.41068	-0.00383	-1.87894	0.0017	39.15852	83.28589	25.00465	-0.00033
Cd2P2Sr1	icsd_030912	Sr	Cd		0	0	1	122	trigonal	164	P-3m1 (164)	5.085118	24.451286	124.337665	5	0.7095	5.6	53.994266	53.33985	53.667058	34.151589	33.702833	33.927211	0.078844	84.066579	-0.431934	-0.259161	-0.863868	0	-0.995037	-0.099504	75.014217	94.18532	83.496495	6.214492	0.074428	75.918849	93.608364	0.811026	108.53988	32.52002	28.97814	-1.38282	-0.01079	0.01997	32.52002	108.6477	28.9731	1.38925
Cd2Sb2Sr1	icsd_012153	Sr	Cd		0	0	1	122	trigonal	164	P-3m1 (164)	5.848873	31.568356	184.639292	5	0	5.6	37.266676	36.830945	37.04881	19.331071	18.195217	18.763144	0.323961	48.159417	0	-0.707107	0.707107	-0.845154	-0.507093	0.169031	37.822397	59.903163	46.82647	6.34818	0.135568	47.537225	57.437277	0.827637	70.69532	24.48968	21.88264	-2.80049	-0.02024	0.02129	24.48968	70.4434	21.93923	2.81069
Cd3Cs2Te4	icsd_090369	Cs	Cd		0	0	1	234	orthorhombic	72	Icma (72)	5.029819	40.843455	205.435198	18	1.5648	7.944444	14.310156	14.154362	14.232259	7.020215	6.347951	6.684083	0.54052	17.338022	-0.707107	0	-0.707107	-0.707107	0.707107	0	12.589186	25.509781	17.008276	2.881004	0.169388	17.621143	20.898925	0.84316	23.6521	12.44893	7.94492	-0.00493	0.01084	0.00011	12.44893	23.45499	9.47462	-0.00224
Cd3K2S4	icsd_081655	K	Cd		1	0	0	234	orthorhombic	62	Pnma (62)	3.646051	27.512797	100.313074	36	1.7906	5.277778	23.418913	22.882023	23.150468	12.89922	12.152848	12.526034	0.33054	31.836223	0	-1	0	0	-0.581238	0.813733	23.944724	43.168314	31.82711	4.259923	0.133846	29.980793	35.877717	0.835638	36.72089	14.09779	13.53961	-0.00618	-0.00561	-0.03398	14.09779	33.90432	18.9982	0.01381
Cd3K2Se4	icsd_710063	K	Cd		1	0	0	234	orthorhombic	62	Pnma (62)	4.373266	30.851633	134.922392	36	1.4015	5.222222	20.016788	19.666679	19.841733	10.895975	10.208689	10.552332	0.35442	26.890059	0	-1	0	0	-0.613941	0.789352	19.630529	36.441377	27.044185	3.558623	0.131585	23.715826	29.763722	0.796803	30.02669	12.97889	11.52327	-0.00224	-0.00061	-0.00511	12.97889	29.45616	16.86619	-0.00583
Cd3K2Te4	icsd_081658	K	Cd		1	0	0	234	orthorhombic	62	Pnma (62)	4.607197	37.076674	170.819551	36	1.4412	5.194444	16.210758	15.86896	16.039859	8.616101	7.882111	8.249106	0.487144	21.125745	0	-1	0	0	-0.613941	0.789352	14.299957	29.064871	21.357085	3.17585	0.148702	16.698717	23.054045	0.724329	22.57958	11.41891	9.44001	0.00327	0.00076	0.00041	11.41891	23.38662	14.0744	-0.00411
Cd3Na4Se5	icsd_073814	Na			0	0	1	345	orthorhombic	62	Pnma (62)	4.318529	26.403106	114.022567	48	1.0179	5.895833	28.364796	27.168178	27.766487	13.612083	13.059647	13.335865	0.25555	34.486469	-0.970143	-0.242536	0	0	-1	0	26.407105	45.656781	34.280842	3.640078	0.106184	32.055725	31.908837	1.004603	36.12527	18.1708	18.75123	0.01662	0.00613	-0.00526	18.1708	58.68218	21.0574	0.00915
Cd3Rb2S4	icsd_081656	Rb	Cd		1	0	0	234	orthorhombic	62	Pnma (62)	4.036196	29.092695	117.423819	36	1.7857	6.138889	22.611499	22.486136	22.548817	12.228929	11.487993	11.858461	0.328058	30.269179	-0.743294	0	-0.668965	0	-0.640184	-0.768221	24.429974	40.598416	30.126933	3.728098	0.123746	28.969257	34.178815	0.847579	36.19436	14.85697	13.0046	0.0012	-0.00117	-0.03165	14.85697	35.08188	17.87611	0.00397
Cd3Rb2Se4	icsd_081657	Rb	Cd		1	0	0	234	orthorhombic	62	Pnma (62)	4.669254	32.560475	152.033137	36	1.4088	7.75	19.163817	19.048338	19.106077	10.335806	9.625958	9.980882	0.374778	25.501963	-0.743294	0	0.668965	0	-0.664364	0.747409	19.923546	34.212894	25.467769	3.330722	0.130782	23.080528	28.525504	0.809119	29.58338	13.27875	10.99018	0.00068	0.00036	-0.00487	13.27875	30.53643	15.42407	0.00278
Cd4K1P3	icsd_262033	K			0	0	1	134	trigonal	166	R-3m (166)	4.767718	25.323302	120.734368	8	0	7.375	40.620987	36.690796	38.655891	16.510444	14.893139	15.701792	0.650086	41.487985	-0.786334	0.436852	-0.436852	-0.65561	0.374634	0.65561	34.468172	44.316501	39.507225	2.878757	0.072867	44.144507	37.80251	1.167767	71.59757	48.08794	19.02089	1.92913	-0.02558	0.0082	48.08794	71.5598	19.01263	-1.87424
Cl1Hg2P3	icsd_074771	P			0	0	1	123	monoclinic	15	C2/c (15)	6.348598	23.085029	146.557572	12	1.213	5	49.798997	43.983688	46.891342	24.406842	20.451332	22.429087	1.09927	58.034269	-0.894427	0	-0.447214	-0.709299	0.630488	0.315244	34.908378	99.924923	58.366342	15.616043	0.267552	45.152316	62.75914	0.719454	82.38048	51.29869	31.70341	-0.00972	-14.20431	-0.00474	51.29869	79.70773	30.20433	0.01101
Cl1In5S5	icsd_414221	S			1	0	-1	155	monoclinic	11	P2_1/m (11)	4.607247	25.224998	116.217788	22	1.3325	4.863636	32.236296	29.781685	31.00899	17.358619	15.138639	16.248629	0.815637	41.497665	-0.351123	0	0.936329	0	-0.894427	-0.447214	21.318923	58.482705	40.488188	7.525538	0.18587	28.065051	43.446619	0.645966	59.85105	17.71816	19.38615	0.00364	-1.02803	-0.00142	17.71816	69.80824	23.43892	0.00699
Cl1La1O1	icsd_040297	Cl	O		0	0	1	111	tetragonal	129	P4/nmm (129)	5.155778	20.436401	105.365542	6	3.9563	11	68.701701	66.509906	67.605804	33.782267	30.063873	31.92307	0.65137	82.745264	0	0	-1	-0.707107	-0.707107	0	54.542582	105.842263	81.023937	14.356812	0.177192	54.542582	103.060726	0.529228	129.6616	39.59252	49.16057	0.01011	-0.00902	0.00305	39.59252	129.69844	49.17246	0.00731
Cl1Li4N1	icsd_084649	Cl			0	0	1	114	trigonal	166	R-3m (166)	1.662317	12.856846	21.372158	6	1.7963	5.5	40.814203	39.917114	40.365659	30.752552	30.031018	30.391785	0.142605	72.883689	0	-0.640184	0.768221	-0.874157	0.485643	0	63.340315	84.809503	71.727116	6.881453	0.095939	70.00914	84.473202	0.828773	92.71327	24.67067	14.74759	-0.75996	-0.0512	-0.17124	24.67067	92.53145	14.76256	0.78894
Cl1N1Sr2	icsd_410769	N	Cl		0	0	1	112	trigonal	166	R-3m (166)	3.957201	23.572381	93.280642	4	1.9383	6	48.047871	47.865968	47.956919	29.741757	28.571528	29.156642	0.20859	72.730473	-0.650945	0.390567	-0.650945	0	-0.970143	0.242536	59.254698	85.424967	71.209872	7.066247	0.099231	76.442076	80.127704	0.954003	94.35793	29.33298	24.68041	4.91569	-0.00951	0.00702	29.33298	94.36841	24.69129	-4.87816
Cl1O1Sb1	icsd_024751	Cl			0	0	1	111	monoclinic	14	P2_1/c (14)	3.897196	24.6011	95.875303	36	3.1016	5.5	11.369712	10.089877	10.729795	9.496029	7.383491	8.43976	1.557426	20.059788	0	-1	0	0	0	-1	10.392564	36.342964	18.721967	4.143387	0.221312	36.342964	19.930736	1.823463	24.61181	7.96318	2.0759	-0.0121	-0.76005	-0.01093	7.96318	13.34886	3.45138	-0.01016
Cl1O1Y1	icsd_060586	Cl	O		0	0	1	111	tetragonal	129	P4/nmm (129)	4.337604	17.910835	77.690106	6	5.1821	11.333333	80.200922	77.396635	78.798779	33.752995	24.926452	29.339723	1.80675	78.301038	-0.485643	0	0.874157	-0.707107	-0.707107	0	49.74401	114.306131	71.102266	20.517209	0.288559	51.939213	111.792308	0.464605	149.894	42.80023	61.33443	0.00401	0.01396	0.00227	42.80023	149.96106	61.34855	0.0058
Cl1O4Sb3	icsd_410039	Cl			1	0	0	134	monoclinic	13	P2/c (13)	5.06308	19.052216	96.462898	16	2.6867	6.125	29.86455	28.0478	28.956175	16.725232	13.096509	14.910871	1.450151	38.179201	-0.847998	0	0.529999	0	0	-1	19.759784	82.148802	35.402137	9.299274	0.262675	29.566125	45.356831	0.651856	45.7903	25.10521	8.16263	0.01459	6.20488	-0.04658	25.10521	48.22157	11.31751	0.01629
Cl2Cs1Li1	icsd_245972	Li	Cl		0	0	1	112	tetragonal	129	P4/nmm (129)	2.961454	29.54314	87.490655	8	5.0432	8.5	17.666508	16.979226	17.322867	9.789631	4.749891	7.269761	5.345588	19.132837	0	-1	0	-0.707107	0.707107	0	6.785934	46.667678	16.418837	7.387462	0.449938	29.425424	20.64124	1.425565	28.33677	24.70239	5.57275	-0.00013	-0.00891	-0.00213	24.70239	28.33809	5.58697	-0.00122
Cl2Cs1Li1	icsd_423634	Cs			0	1	0	112	monoclinic	15	C2/c (15)	2.781662	31.452653	87.490655	16	5.0849	6.8125	13.760251	13.51751	13.638881	6.927957	6.352346	6.640151	0.471027	17.139046	-0.662085	0.744845	0.082761	-0.819232	0	0.573462	12.872452	26.773423	16.508497	2.776826	0.168206	18.307548	21.060549	0.869282	25.74124	7.31015	10.29492	0.01544	-2.78669	-0.02567	7.31015	21.8831	7.74434	-0.00488
Cl2Ge3La3	icsd_414173	Ge			1	0	0	233	monoclinic	12	C2/m (12)	5.350967	27.36843	146.447567	16	0	7.25	53.150183	52.783722	52.966953	32.04094	30.645455	31.343197	0.234625	78.537975	-0.894427	0	0.447214	-0.174078	0.696311	0.696311	64.28719	99.695111	78.602891	8.076923	0.102756	69.913715	86.010348	0.812852	86.93828	36.3928	28.65737	0.07597	3.43343	-0.04373	36.3928	96.30261	37.10107	-0.02905
Cl2Hg2P1	icsd_050594	Cl			0	0	1	122	monoclinic	12	C2/m (12)	6.639523	25.16296	167.070049	10	1.5636	3.4	43.229829	38.214883	40.722356	14.597333	8.96833	11.782832	3.269497	32.239084	-0.618853	-0.721995	0.309426	-0.813733	0	0.581238	12.770719	70.236993	28.030256	10.698453	0.381675	21.992069	22.786985	0.965115	80.49025	37.54362	35.56075	-0.00618	-4.24728	-0.01017	37.54362	62.90868	28.65255	-0.00618
Cl2La3Si3	icsd_408031	La	Si	Cl	1	0	0	233	monoclinic	12	C2/m (12)	4.491174	26.430371	118.703389	16	0	7.25	57.040362	56.910453	56.975408	34.919879	33.272417	34.096148	0.249854	85.277413	-0.919145	0	0.393919	-0.172774	0.604708	0.777482	70.506101	108.261146	85.10592	8.628108	0.101381	77.325274	92.712145	0.834036	96.23874	39.30907	29.64665	-0.07105	5.16721	-0.10718	39.30907	98.17975	38.41994	-0.04701
Cl2Li1Rb1	icsd_036216	Li	Cl		1	0	0	112	orthorhombic	63	Ccmm (63)	2.427182	27.932659	67.79764	8	5.1478	5.875	18.147373	17.873903	18.010638	9.655756	8.65282	9.154288	0.594843	23.4841	-0.743294	0	-0.668965	-0.658505	0.752577	0	16.704759	34.137422	22.782526	4.024055	0.176629	21.533245	22.842178	0.942697	31.01784	15.69614	11.2721	0.00428	-0.00751	0.01293	15.69614	33.30975	7.79866	0.00469
Cl2O1Pd2	icsd_061333	O			0	0	1	122	tetragonal	141	I4_1/amd (141)	4.696597	21.195722	99.547772	10	1.3561	3.2	44.890217	44.228837	44.559527	15.40398	9.683383	12.543682	2.968775	34.402865	-0.707107	0.707107	0	-1	0	0	16.084594	73.997237	27.515873	9.518458	0.345926	41.908175	31.707227	1.321723	90.5184	18.52606	31.44604	0.00103	-0.02155	0.00424	18.52606	90.54101	31.47446	0.00906
Cl2O5Sb4	icsd_024029	Sb	O		0	0	1	245	monoclinic	14	P2_1/c (14)	4.614236	20.870766	96.302645	22	2.6369	5.590909	28.301677	23.732402	26.017039	15.857604	11.715049	13.786327	1.960581	35.15031	-0.485643	0	-0.874157	-0.406138	0	0.913812	18.196232	82.929556	33.185796	11.201251	0.337531	31.845281	31.044275	1.025802	30.10731	13.23344	20.41511	0.04535	-1.71029	0.00235	13.23344	53.36716	17.22816	0.02228
Cl3Mn1Na1	icsd_002552	Na	Mn		0	0	1	113	trigonal	148	R-3 (148)	2.859059	21.406719	61.20308	10	0	4.7	33.208048	32.971328	33.089688	16.550665	15.771943	16.161304	0.254049	41.695722	-0.384111	-0.768221	0.512148	-0.457496	-0.762493	-0.457496	31.672177	51.362309	41.242527	4.74684	0.115096	38.066751	44.027716	0.864609	60.39575	22.62863	21.32882	0.04908	-2.70359	0.77833	22.62863	55.63812	22.42098	1.90178
Cl4Cr1Cs2	icsd_041571	Cs	Cl		0	0	1	124	tetragonal	139	I4/mmm (139)	3.453156	31.574226	109.03074	7	1.186	8	18.500571	17.996687	18.248629	9.985193	7.850801	8.917997	1.387345	23.006309	-0.309426	-0.618853	0.721995	-1	0	0	15.065174	35.876504	20.873448	5.958504	0.285459	27.764455	34.031743	0.81584	40.3742	11.64243	8.033	0.02946	0.05112	0.0068	11.64243	40.09368	8.19167	0.02547
Cl4Cr1Rb2	icsd_009858	Cr	Cl		0	0	1	124	tetragonal	139	I4/mmm (139)	2.455449	35.237726	86.524437	7	1.945	4.857143	10.648869	10.60094	10.624905	4.967805	4.213898	4.590852	0.89907	12.038652	-0.137361	0.824163	-0.549442	-0.707107	0.707107	0	7.144191	17.23574	11.945717	2.367902	0.198222	12.683129	11.849549	1.070347	14.9719	9.31049	7.10563	-1.19294	0.97877	-0.7399	9.31049	16.62687	7.09171	0.93468
Cl4K2Mg1	icsd_004035	K	Mg	Cl	0	0	1	124	tetragonal	139	I4/mmm (139)	2.059803	28.136683	57.95603	7	4.767	6.857143	22.078941	22.006422	22.042681	11.346115	10.677249	11.011682	0.316515	28.319299	-0.523205	0.523205	0.672692	-1	0	0	23.847328	35.368225	27.010585	2.801408	0.103715	33.828022	32.024547	1.056315	40.79101	9.7654	14.00406	0.00365	0.01003	0.0132	9.7654	40.78788	14.0033	0.00153
Cl5Cs1Pb2	icsd_249888	Cs			0	0	1	125	tetragonal	140	I4/mcm (140)	4.599364	32.699555	150.397167	16	3.8425	6.875	15.360978	12.242685	13.801831	8.443447	7.326952	7.885199	1.016616	19.871332	0	0	-1	-0.707107	-0.707107	0	13.242084	34.320185	19.673718	5.164854	0.262526	13.242084	27.138855	0.487938	30.75887	17.87945	6.50225	-0.0038	0.01392	0.01003	17.87945	30.77131	6.48915	-0.00633
Cl5Nb3O2	icsd_091781	Cl			0	1	0	235	orthorhombic	58	Pnnm (58)	3.827502	21.170846	81.03146	40	1.346	3.5	49.514669	41.074192	45.29443	30.501713	23.507484	27.004599	1.693154	67.58281	0	-0.789352	0.613941	-1	0	0	42.294404	159.345587	61.927166	20.795932	0.335813	51.3319	101.588259	0.505294	170.51174	22.52273	21.31704	-0.02573	-0.03861	0.00839	22.52273	56.91432	18.25	0.00758
Cl6Pb2Pd1	icsd_078873	Cl			1	0	0	126	monoclinic	14	P2_1/c (14)	4.774179	28.348525	135.340922	18	1.9314	4.111111	14.668736	11.32983	12.999283	8.988853	6.487606	7.73823	2.222413	19.370965	-0.936329	0	-0.351123	-0.207514	0.691714	-0.691714	9.574056	30.684192	18.49729	5.061174	0.273617	11.931247	19.724958	0.604881	21.84326	3.62059	13.43559	-0.01879	-6.01323	-0.03504	3.62059	19.92947	13.89845	-0.01264
Cl7Cs1Ti2	icsd_067168	Cl			1	0	2	127	monoclinic	13	P2/c (13)	2.850674	27.774564	79.176225	20	1.0102	9.55	16.637591	11.504835	14.071213	10.220663	7.482145	8.851404	2.276174	21.951414	-0.872872	-0.436436	-0.218218	0	-1	0	11.004245	41.330767	20.905613	8.220054	0.393198	20.867985	21.465055	0.972184	13.49268	6.93643	7.39877	-0.00154	-1.40475	-0.02276	6.93643	46.46108	10.29435	-0.0253
Cl7Cs3Mg2	icsd_066828	Cl			0	0	1	237	tetragonal	139	I4/mmm (139)	3.188087	30.187909	96.241694	12	4.3721	10.25	21.431751	21.386607	21.409179	11.317395	10.188181	10.752788	0.556289	27.632252	-0.331042	-0.579324	0.744845	-0.707107	0.707107	0	21.318376	38.047222	26.484792	4.608902	0.174021	29.905434	35.32403	0.846603	39.02434	13.74069	12.8091	0.05883	0.06027	-0.01392	13.74069	39.02128	12.8081	0.05557
Cl7K3Mn2	icsd_036127	Cl			0	0	1	237	tetragonal	139	I4/mmm (139)	2.689102	24.46058	65.776984	12	0	7.666667	28.012731	27.122424	27.567578	11.437247	8.569787	10.003517	1.70583	26.772247	-1	0	0	-0.581238	-0.813733	0	10.111015	43.286214	26.657684	6.372892	0.239064	24.534789	26.546646	0.924214	29.01519	25.08911	23.60454	0.02477	-0.03559	0.7428	25.08911	45.79798	17.93224	0.02603
Cl8Mn3Na2	icsd_001846	Na			0	0	1	238	trigonal	166	R-3m (166)	2.909535	21.705812	63.153825	13	0	4.461538	32.058356	31.520046	31.789201	14.256101	12.487922	13.372011	0.725034	35.182854	0	-0.752577	0.658505	0	-0.986394	-0.164399	23.959537	47.312709	33.169468	6.460193	0.194763	41.364209	43.965004	0.940844	58.53181	24.90399	18.03227	-2.95257	0.00248	0.03162	24.90399	58.73851	18.10171	2.94837
Cl8Na2Ti3	icsd_401026	Na			0	0	1	238	trigonal	166	R-3m (166)	2.664353	22.686259	60.444191	13	0.9539	4.615385	32.08184	31.120895	31.601367	17.01183	13.599602	15.305716	1.28541	39.534476	-0.616316	-0.35218	-0.704361	-0.854358	-0.512615	0.085436	25.3705	58.420339	36.239614	10.013912	0.276325	46.254224	57.39724	0.805861	67.47548	22.1944	14.62323	-1.89238	-0.01293	0.01563	22.1944	67.40127	14.60275	1.94262
Cl8Na2Ti3	icsd_401027	Na			0	0	1	238	trigonal	160	R3m (160)	2.664346	22.686313	60.444191	13	0.9539	4.615385	32.048246	31.096826	31.572536	17.002995	13.593849	15.298422	1.284525	39.513241	-0.616316	0.35218	0.704361	-0.854358	-0.512615	0.085436	25.320319	58.398819	36.219757	10.002392	0.276158	46.265201	57.348067	0.806744	67.43263	22.13967	14.63588	-1.92812	0.00878	0.03679	22.13967	67.2943	14.56389	1.8874
Co1Cu2O3	icsd_033996	Cu			1	0	0	123	orthorhombic	59	Pmmn (59)	6.683643	9.690447	64.767487	12	0	4.5	150.741246	143.980619	147.360932	55.238859	48.168715	51.703787	0.780849	138.869841	-0.707107	0	0.707107	0	-1	0	91.175412	233.483912	130.571894	27.694055	0.212098	142.911383	161.967772	0.882345	214.45468	129.85804	93.26469	-0.18053	0.05419	-0.27812	129.85804	317.0739	85.28017	0.65642
Co1F3Na1	icsd_072321	Co			0	0	1	113	orthorhombic	62	Pbnm (62)	4.018579	11.480625	46.135803	20	0	4.6	80.960981	80.567354	80.764168	33.428233	32.900674	33.164453	0.08506	87.514563	-0.919145	0	-0.393919	0	0	-1	77.00328	103.191938	86.969361	4.890757	0.056235	103.191938	86.329407	1.195328	116.35906	66.82773	51.23451	0.01745	-0.0151	-0.13234	66.82773	131.72714	55.65748	0.01827
Co1F4K2	icsd_033522	K	F		0	0	1	124	tetragonal	139	I4/mmm (139)	3.285203	15.389337	50.557098	7	0	8	48.834776	48.534258	48.684517	23.897653	22.327234	23.112443	0.357874	59.86406	-0.445976	-0.594635	0.668965	0	0	-1	49.648287	79.202494	56.897119	6.622134	0.116388	79.202494	68.320446	1.15928	89.0344	37.32055	23.53385	0.00033	0.01416	0.00027	37.32055	92.67207	24.0341	0.00995
Co1Ge1La1	icsd_085860	La	Co	Ge	0	0	1	111	tetragonal	129	P4/nmm (129)	6.675129	22.428546	149.713438	6	0	10	54.514144	29.464605	41.989375	40.149881	24.86438	32.507131	3.923932	77.517381	0	0	-1	-0.698535	-0.698535	0.15523	18.912062	125.992293	79.792912	32.506981	0.407392	18.912062	114.619091	0.164999	132.20564	37.93814	30.21059	-0.00644	0.05824	0.03821	37.93814	133.05129	29.80099	0.00349
Co1Ge2La1	icsd_623464	La	Ge		0	1	0	112	orthorhombic	63	Cmcm (63)	7.201985	19.777945	142.440463	8	0	11.375	94.315101	93.166659	93.74088	54.218567	53.520995	53.869781	0.077495	135.628868	-0.778499	0.07785	-0.622799	0	0	-1	118.089204	148.644288	134.635513	7.4644	0.055442	136.988428	127.458728	1.074767	155.77225	63.00718	41.23917	-0.22551	-0.20911	-1.51757	63.00718	177.1958	65.90068	0.57687
Co1Ge2Y1	icsd_623665	Ge			0	1	0	112	orthorhombic	63	Cmcm (63)	6.689971	18.189002	121.683885	8	0	11.5	102.464351	100.725016	101.594684	49.818715	47.841052	48.829883	0.223959	126.26117	-0.581238	-0.813733	0	-0.107833	-0.646997	-0.754829	105.14861	148.578378	123.88859	10.547894	0.08514	122.157172	119.689246	1.020619	170.79445	67.84311	43.55628	0.0031	-0.09258	-4.50497	67.84311	181.07821	87.88003	0.00542
Co1Ge3La1	icsd_042373	La			0	0	1	113	tetragonal	107	I4mm (107)	7.227154	19.105262	138.076677	5	0	12	93.093043	93.004198	93.048621	54.366072	53.535563	53.950817	0.078521	135.637624	-0.123091	-0.123091	-0.984732	-0.693103	-0.693103	-0.19803	113.022554	148.731606	136.400947	7.678078	0.056291	114.584699	141.993717	0.80697	166.43068	54.70608	61.15806	1.59648	-0.23293	-0.2134	54.70608	166.20075	62.11633	-0.07106
Co1K1O2	icsd_015770	K	Co	O	0	0	1	112	tetragonal	129	P4/nmm (129)	3.855676	14.000162	53.980087	8	0.244	5	83.719544	67.630723	75.675134	45.445625	33.025831	39.235728	2.118207	100.36208	-0.39036	-0.48795	-0.78072	-0.099504	-0.995037	0	59.909154	179.076146	91.346161	35.427765	0.387841	84.285248	172.139339	0.489634	199.17664	72.01665	28.93658	-0.00565	-0.00583	-0.04248	72.01665	208.29622	27.04836	-0.01135
Co1La1Si1	icsd_658265	La	Co	Si	0	0	1	111	tetragonal	129	P4/nmm (129)	5.715769	21.878411	125.051946	6	0	9.333333	58.601819	32.33943	45.470625	39.922435	25.969221	32.945828	3.498576	79.610235	0	0	-1	-0.743294	0.668965	0	21.837315	137.260561	80.996067	33.067809	0.408264	21.837315	123.498179	0.176823	140.45394	44.31445	29.71831	0.16168	0.0142	-0.30743	44.31445	141.07823	32.70333	0.11142
Co1La2O4	icsd_016404	La	O		0	0	1	124	orthorhombic	64	Ccme (64)	7.003428	13.573908	95.063885	14	0	7.357143	152.604167	152.518399	152.561283	73.33403	69.212757	71.273393	0.298287	185.009364	0	-1	0	-0.707107	0.707107	0	148.468954	229.198777	187.691196	19.707693	0.105001	157.180188	190.324159	0.825855	228.83489	121.7573	111.11047	-0.01124	0.0018	-0.00465	121.7573	228.85686	111.18052	-0.01105
Co1La2O4	icsd_245657	La	Co	O	0	0	1	124	tetragonal	139	I4/mmm (139)	7.005565	13.569766	95.063885	7	0	4.571429	145.943148	142.443734	144.193441	71.741695	62.841184	67.29144	0.732742	174.698522	0	0	-1	0	-0.936329	0.351123	102.235432	224.882005	169.231621	25.613569	0.151352	102.235432	170.150692	0.600852	293.27948	54.1818	111.28074	-0.00998	-0.02109	-0.03129	54.1818	293.24747	111.26433	-0.02107
Co1Li8O6	icsd_021026	O			0	0	1	168	hexagonal	185	P6_3cm (185)	2.435161	9.567418	23.2982	30	0	5.2	73.814007	73.795452	73.804729	34.994616	30.485285	32.739951	0.739843	85.567242	-0.21693	0.976187	0	-0.847998	0.529999	0	53.442751	114.391743	84.725026	14.042998	0.165748	109.204033	79.463575	1.374265	111.75233	67.70541	42.34687	-0.05118	-0.02924	-11.88399	67.70541	110.52865	45.48447	-0.05598
Co1Mn1O3	icsd_031854	Mn	Co		1	1	1	113	trigonal	148	R-3 (148)	5.963478	9.014555	53.758097	10	0.5795	4.8	235.876336	235.807126	235.841731	127.613495	121.885279	124.749387	0.235277	318.152217	-0.857143	-0.428571	-0.285714	-0.709299	0.315244	-0.630488	245.431671	387.813356	315.850696	31.652128	0.100212	286.053778	302.98461	0.94412	396.80641	139.50266	162.17779	-22.13668	-9.23035	-16.7017	139.50266	411.32037	158.50936	20.14353
Co1Mn1Si1	icsd_053006	Si			0	0	1	111	hexagonal	194	P6_3/mmc (194)	7.144447	10.998036	78.574891	6	0	11.833333	215.09394	198.556261	206.825101	87.231494	48.421928	67.826711	4.090727	183.428778	-0.766261	0.287348	-0.574696	-0.870063	-0.483368	-0.096674	57.932167	350.632447	155.413269	61.957798	0.398665	304.99513	187.823236	1.623841	371.13456	218.43228	96.11322	19.48967	-26.72859	30.81177	218.43228	352.65529	113.9842	-50.91278
Co1Na1O2	icsd_006152	Na			0	0	1	112	trigonal	166	R-3m (166)	4.888827	9.673665	47.292877	4	2.0603	6	141.352338	137.135164	139.243751	96.199523	86.726571	91.463047	0.576891	225.102519	-0.616316	-0.35218	0.704361	0	-0.980581	0.196116	164.751007	300.145625	217.325657	38.855507	0.178789	201.462423	277.49131	0.726013	317.11987	76.33033	65.4561	21.67395	0.02462	-0.04158	76.33033	317.18577	65.51636	-21.65617
Co1Na1O2	icsd_246585	Na			0	0	1	112	hexagonal	194	P6_3/mmc (194)	4.864165	9.722711	47.292877	8	2.0019	5.75	140.132374	137.054191	138.593283	87.563429	78.673585	83.118507	0.587442	207.811871	-0.557086	0.371391	0.742781	-0.124035	0.992278	0	160.051952	275.399736	198.224471	37.362028	0.188483	215.754725	274.785602	0.785175	305.59447	82.90553	61.36262	0.02724	0.03797	0.14552	82.90553	307.18662	62.24701	0.03178
Co1Nb2O6	icsd_015854	Co	O		1	0	0	126	orthorhombic	60	Pbcn (60)	5.536367	11.355539	62.868433	36	0	3.527778	153.913709	153.204977	153.559343	74.773753	71.728601	73.251177	0.216895	189.604956	-1	0	0	-0.552345	-0.092057	-0.828517	146.636208	231.05787	190.259369	18.211734	0.095721	146.636208	172.766586	0.848753	225.92335	114.81224	118.86132	-1.81948	0.01353	-0.01039	114.81224	234.42291	90.74979	-3.92715
Co1Nb4Se8	icsd_624305	Co			0	0	1	148	hexagonal	194	P6_3/mmc (194)	6.648556	20.408002	135.683737	26	0	4.615385	70.875749	68.630554	69.753151	51.465671	50.895823	51.180747	0.088696	123.368687	0	0	-1	-0.913812	-0.406138	0	105.53387	138.904731	122.81869	10.039275	0.081741	105.53387	138.430631	0.762359	155.79655	45.16338	30.359	0.0111	-0.00254	0.26833	45.16338	155.69389	30.32401	0.01712
Co1O3Sr1	icsd_108896	Sr			0	0	1	113	monoclinic	11	P2_1/m (11)	5.035403	12.831551	64.612027	20	0	5.8	100.33361	90.194263	95.263937	51.55272	13.438562	32.495641	14.293308	87.53397	0	-0.707107	-0.707107	-0.894427	0.447214	0	13.74462	221.95082	60.525739	52.287844	0.863894	127.566108	206.996343	0.616272	255.89647	75.9215	46.67606	-0.36411	-1.89449	-0.17368	75.9215	203.27837	29.83943	-0.38406
Co1O3Ti1	icsd_048107	Ti	Co		0	0	1	113	trigonal	148	R-3 (148)	5.144671	9.992816	51.409748	10	0	4.8	192.58338	191.740529	192.161955	90.140052	89.140457	89.640254	0.060464	232.732232	-0.828517	0.092057	0.552345	-0.238667	0.795557	0.55689	202.814198	256.536937	232.684841	10.889183	0.046798	225.144201	230.792816	0.975525	315.536	147.2636	126.97809	-3.37379	11.39451	-0.59949	147.2636	320.56137	127.06363	3.65185
Co1O4Sr2	icsd_246483	Sr	O		0	0	1	124	tetragonal	139	I4/mmm (139)	5.459358	12.956106	70.732024	7	0	6.857143	115.557982	115.513276	115.535629	63.267489	62.708362	62.987925	0.044969	159.904726	-0.953463	-0.095346	-0.286039	-0.707107	0.707107	0	147.923552	181.118848	160.144986	6.778394	0.042327	172.161577	163.049387	1.055886	192.97273	82.55876	70.24103	0.15792	-1.09717	-2.82704	82.55876	192.50721	70.37739	-0.02422
Co1S8Ti4	icsd_624872	Co			0	0	1	148	monoclinic	12	C2/m (12)	3.66131	17.685186	64.750946	13	0	4.615385	65.644561	63.790777	64.717669	40.953977	29.098138	35.026058	2.066276	89.018791	-0.383482	0.690268	0.613572	-0.466252	-0.839254	-0.279751	38.794533	141.445053	80.135457	24.778334	0.309206	98.141829	103.356157	0.94955	136.28241	40.74082	26.8578	1.82822	-13.1562	-1.68803	40.74082	145.74742	32.76455	0.52827
Co2Cs1S2	icsd_622529	Cs			0	0	1	122	tetragonal	139	I4/mmm (139)	5.207723	20.081972	104.581344	5	0	11.2	52.843693	48.673061	50.758377	33.550732	29.206817	31.378775	0.829334	78.052362	-0.362143	-0.452679	0.814822	-0.164399	-0.986394	0	55.645839	121.407672	74.200403	17.259136	0.232602	63.730762	107.951516	0.590365	129.55626	26.15643	23.09182	-0.23597	-0.00351	5.14133	26.15643	129.7515	23.39948	-0.28047
Co2Cs1Se2	icsd_622533	Cs			0	0	1	122	tetragonal	139	I4/mmm (139)	5.99133	22.654359	135.729731	5	0	11.2	38.71376	36.945521	37.82964	21.590638	19.0145	20.302569	0.725275	51.665094	-0.707107	0.707107	0	-0.980196	-0.140028	-0.140028	32.688742	76.218741	49.431065	9.6999	0.196231	43.122546	54.164103	0.796146	83.18032	16.03818	23.77546	-0.26513	3.94861	7.39453	16.03818	82.21992	23.86352	0.55635
Co2F7K3	icsd_033524	F			0	0	1	237	tetragonal	139	I4/mmm (139)	3.548688	14.355718	50.943962	12	0	7.916667	58.116584	57.870108	57.993346	28.777335	27.30662	28.041977	0.273556	72.448702	-0.476731	-0.572078	0.667424	0	0	-1	61.644068	92.929425	69.455913	7.170243	0.103234	92.929425	81.693256	1.137541	102.40423	42.75706	30.05889	0.0699	0.03021	-0.00854	42.75706	110.81532	29.64991	0.07017
Co2Ge2La1	icsd_081750	La	Co		0	0	1	122	tetragonal	139	I4/mmm (139)	7.658262	17.435358	133.524541	5	0	11.2	108.512964	104.221967	106.367466	72.265223	67.684824	69.975023	0.379534	172.170344	0	0	-1	-0.624695	-0.624695	-0.468521	100.941538	199.602628	175.757198	21.865249	0.124406	100.941538	178.202643	0.566442	211.43998	67.74309	70.62862	-0.00474	-0.25889	0.2129	67.74309	211.42634	70.24091	-0.39855
Co2Ge2Sr1	icsd_000407	Sr	Co		0	0	1	122	tetragonal	139	I4/mmm (139)	6.60176	17.645633	116.492239	5	0	11.6	81.263274	71.675071	76.469173	60.347841	54.109039	57.22844	0.710276	137.407405	0	0	-1	-0.658145	0.658145	0.365636	66.280469	163.892111	140.216503	25.610806	0.182652	66.280469	156.272262	0.424135	183.63246	44.77478	47.21901	0.32687	0.54988	-0.64603	44.77478	183.65636	47.15733	0.60098
Co2Ge2Y1	icsd_623662	Y	Co		0	0	1	122	tetragonal	139	I4/mmm (139)	7.28698	16.044957	116.91928	5	0	11.4	126.010626	125.276362	125.643494	78.931767	77.002174	77.966971	0.131156	193.811557	0	0	-1	-0.658145	-0.658145	0.365636	152.957278	221.491665	197.179789	14.253045	0.072285	152.957278	196.067523	0.780126	222.73918	86.82688	79.59702	0.43359	0.19958	1.55164	86.82688	223.12042	80.4966	-0.53594
Co2Hf1Si2	icsd_623793	Hf	Co		0	0	1	122	tetragonal	139	I4/mmm (139)	8.7503	13.379779	117.077081	5	0	11.6	189.224561	189.218651	189.221606	116.971861	114.445752	115.708806	0.110394	288.350981	-0.970143	0	0.242536	-0.707107	0.707107	0	245.070908	326.065484	290.740047	18.79395	0.064642	288.867039	291.122428	0.992253	320.98656	132.12254	112.93062	-6.17644	7.23641	-0.57015	132.12254	322.08431	112.4767	6.89491
Co2K1S2	icsd_623956	K	Co		0	0	1	122	tetragonal	139	I4/mmm (139)	4.290743	17.112947	73.427261	5	0	13.6	66.76466	54.10339	60.434025	43.778976	35.496201	39.637589	1.400733	97.579271	-0.09245	-0.3698	0.9245	-0.707107	-0.707107	0	62.005652	175.858414	94.613021	30.557246	0.322971	63.142462	151.155279	0.417732	150.64566	61.82116	25.5244	-0.33042	0.06699	0.20941	61.82116	154.47595	25.87987	-0.11359
Co2K1Se2	icsd_182838	K	Co		0	0	1	122	tetragonal	139	I4/mmm (139)	5.367354	19.48365	104.575648	5	0	12	53.425961	41.637931	47.531946	33.089467	26.83434	29.961903	1.448616	74.278488	0	0	-1	-0.668965	-0.743294	0	34.783974	119.051985	74.049775	22.138968	0.298974	34.783974	107.8617	0.322487	118.84391	38.421	29.05991	-0.16172	0.08995	0.28665	38.421	122.11282	29.62703	0.10802
Co2La1P2	icsd_087583	La	Co		0	0	1	122	tetragonal	139	I4/mmm (139)	6.602076	16.032712	105.84918	5	0	11.2	122.806791	122.004222	122.405507	58.589565	49.770637	54.180101	0.892535	141.642057	0	-0.099504	0.995037	-0.872872	0.218218	-0.436436	77.05633	175.771557	138.666694	22.52624	0.162449	77.498035	139.896761	0.553966	225.32151	45.18248	100.40553	-5.98743	2.4486	-11.93603	45.18248	224.45435	103.50636	0.92153
Co2La1Si2	icsd_090777	La	Co		0	0	1	122	tetragonal	139	I4/mmm (139)	6.363564	16.332161	103.930751	5	0	11.6	119.711519	107.72633	113.718924	88.618973	76.648647	82.63381	0.892113	199.563784	0	0	-1	-0.631169	-0.631169	0.450835	89.801173	247.53112	205.076143	37.730727	0.183984	89.801173	209.530334	0.428583	246.95241	75.52886	76.278	-0.31968	-0.59735	0.09763	75.52886	247.75486	76.54959	-0.43672
Co2La2O5	icsd_051198	La			0	1	0	225	orthorhombic	62	Pnma (62)	6.955877	12.617239	87.763964	36	0	4.527778	139.795079	134.739012	137.267046	61.862041	59.024766	60.443404	0.277871	158.12144	-0.894427	0.447214	0	0	-1	0	129.809501	220.196456	156.599087	17.855974	0.114023	220.196456	146.206779	1.506062	183.98311	73.5895	100.72809	-0.00549	-0.89326	0.05849	73.5895	286.43186	115.37641	-0.0281
Co2Mn3O8	icsd_001979	Co			0	0	1	238	orthorhombic	31	Pmn2_1 (31)	5.691806	9.216258	52.457151	26	0	4.115385	185.071994	178.912383	181.992189	93.957245	91.462459	92.709852	0.170811	237.757083	-0.845154	-0.507093	0.169031	-0.76337	0.593732	-0.254457	181.600273	287.231295	239.519023	27.617142	0.115303	223.562896	230.114888	0.971527	286.17814	123.64199	114.43859	-4.46836	11.33533	-31.57542	123.64199	318.47129	141.16064	-4.19463
Co2Mo3O8	icsd_010143	Co	O		0	0	1	238	hexagonal	186	P6_3mc (186)	6.225899	10.950517	68.176816	26	0.0771	4.153846	185.033601	178.877466	181.955534	70.795289	60.193902	65.494595	0.915018	175.434648	-0.485071	-0.485071	-0.727607	-0.768221	0.640184	0	110.513264	248.691979	164.722365	40.281503	0.244542	194.015513	246.164611	0.788154	330.70631	149.6454	115.22083	-0.12592	0.10718	-2.02586	149.6454	333.10633	112.03685	-0.132
Co2O3Rb2	icsd_095833	Rb			1	0	0	223	orthorhombic	62	Pnma (62)	4.046248	19.745623	79.895682	28	0.2306	6.642857	34.932832	30.382595	32.657714	12.972715	8.651866	10.812291	2.646826	29.21294	-0.789352	-0.613941	0	0	-1	0	16.952196	88.811394	24.023494	7.756599	0.322876	23.798248	32.830373	0.724885	37.30444	10.94305	26.0688	0.009	-0.0019	-0.05115	10.94305	101.77123	25.39169	0.00787
Co2P2Sr1	icsd_624635	Sr	Co		0	0	1	122	tetragonal	139	I4/mmm (139)	5.471839	16.231631	88.816877	5	0	11.2	101.057527	92.73292	96.895223	56.27555	53.922027	55.098789	0.308004	138.957329	0	0	-1	0	-1	0	98.140665	181.484839	136.829605	17.078598	0.124817	98.140665	156.676187	0.626392	215.68491	66.33607	56.12794	0.34692	0.12166	0.76717	66.33607	216.15668	56.13162	0.09379
Co2Rb1S2	icsd_624795	Rb	Co		0	0	1	122	tetragonal	139	I4/mmm (139)	4.929266	18.020315	88.826932	5	0	8.8	63.701509	55.01711	59.359309	41.706981	35.696968	38.701975	0.999659	95.377395	-0.19245	0.19245	0.96225	-0.707107	-0.707107	0	66.066069	163.852082	93.845516	24.562335	0.261732	66.837547	131.572969	0.507988	129.25011	63.94094	25.31036	-3.00672	0.1329	0.40857	63.94094	136.25355	27.64939	2.87175
Co2Rb1Se2	icsd_624798	Rb			0	0	1	122	tetragonal	139	I4/mmm (139)	5.640952	21.268631	119.975319	5	0	11.2	40.677288	38.583321	39.630305	22.018579	19.919768	20.969174	0.581087	53.475818	0	-0.141421	0.989949	-1	0	0	40.08119	80.965707	51.236399	8.517132	0.166232	40.293121	61.050423	0.659997	93.11384	18.24491	24.13001	-0.17663	-1.07675	2.34123	18.24491	86.29304	25.15959	-1.79239
Co2S2Tl1	icsd_624879	Tl	Co		0	0	1	122	tetragonal	139	I4/mmm (139)	7.112765	18.040761	128.319692	5	0	13.6	41.235361	1.768427	21.501894	20.778287	0.536439	10.657363	210.98635	27.438768	-0.640184	0.768221	0	-0.928477	-0.371391	0	0.273012	86.445485	11.597748	16.372112	1.411663	0.993322	14.808598	0.067077	95.20781	5.59507	34.0123	0.60498	0.83583	16.87097	5.59507	72.15988	32.88208	1.525
Co2Sc1Si2	icsd_624959	Sc	Co		0	0	1	122	tetragonal	139	I4/mmm (139)	5.316473	13.680004	72.729374	5	0	11.6	157.98931	157.957998	157.973654	99.502082	97.13618	98.319131	0.121981	244.279443	0	-0.986394	-0.164399	-0.707107	-0.707107	0	209.603524	286.835738	246.442687	16.677297	0.067672	242.42193	250.012148	0.969641	271.22065	114.55161	91.53142	4.00756	-2.98389	1.2982	114.55161	270.92085	90.97259	-3.41732
Co2Si2Y1	icsd_053088	Y	Co		0	0	1	122	tetragonal	139	I4/mmm (139)	5.892588	14.819548	87.325489	5	0	11.2	144.053244	142.895587	143.474416	107.316185	104.758237	106.037211	0.13019	255.233429	0	0	-1	-0.658145	-0.658145	0.365636	196.236616	285.037758	259.460816	18.658611	0.071913	196.236616	259.190004	0.757115	279.13225	87.69377	82.38424	-0.10205	0.30744	1.88547	87.69377	279.08557	82.41168	0.38077
Co2Si2Zr1	icsd_625135	Zr	Co		0	0	1	122	tetragonal	139	I4/mmm (139)	6.494773	13.564041	88.095365	5	0	11.6	183.91258	183.892015	183.902297	117.682406	115.360588	116.521497	0.100745	288.609617	-0.970143	0	0.242536	-0.693103	-0.693103	-0.19803	249.534569	326.237411	291.273608	18.250568	0.062658	274.644871	293.011195	0.937319	320.49473	123.76248	109.70201	-6.07766	7.87553	0.56873	123.76248	322.24898	108.62725	6.65894
Co3Cs2S4	icsd_065256	Cs	Co		0	0	1	234	orthorhombic	72	Icma (72)	4.704848	22.387136	105.328065	18	0	6.388889	38.448166	38.090362	38.269264	23.634051	22.700852	23.167451	0.214936	57.8322	-0.496139	0	-0.868243	-1	0	0	48.325237	72.510081	56.844419	6.089043	0.107118	50.145595	67.368446	0.744348	82.20103	18.47269	22.30329	-0.03935	0.02825	-0.01613	18.47269	75.44121	23.04117	-0.04377
Co3In2S2	icsd_010011	In			1	1	1	223	trigonal	166	R-3m (166)	7.086971	15.751085	111.627486	7	0	9	83.271938	81.439005	82.355471	39.224579	22.313282	30.76893	3.81202	82.084257	-0.348743	-0.929981	0.116248	-0.485071	0.727607	0.485071	34.894917	148.344022	75.40041	32.134674	0.426187	70.421087	97.81316	0.719955	102.06927	68.6921	60.45108	9.77455	5.98985	8.45282	68.6921	127.3697	60.50995	-2.33165
Co3Rb2S4	icsd_624797	Rb			0	0	1	234	orthorhombic	72	Icma (72)	4.204	20.890379	87.823163	18	0	10.277778	38.76081	38.081248	38.421029	23.203986	21.876921	22.540454	0.321148	56.56057	-0.485643	0	-0.874157	-1	0	0	44.620451	74.918844	55.422009	7.399972	0.13352	46.489389	68.11913	0.682472	85.11392	19.05337	22.42063	0.03988	0.15717	0.01296	19.05337	75.51301	23.92863	0.03325
Co3S2Sn2	icsd_173760	Sn			0	0	1	223	trigonal	166	R-3m (166)	7.319143	15.503729	113.474005	7	0	7.428571	104.71171	104.549211	104.63046	55.632064	54.240838	54.936451	0.1298	140.261203	0	-0.928477	0.371391	0	0	-1	126.516432	179.404731	138.706314	10.469286	0.075478	179.404731	131.222951	1.367175	171.9326	77.37724	59.95493	-2.77499	-0.06059	0.03681	77.37724	171.54838	58.37111	2.88086
Co3S2Sn2	icsd_624867	Sn			0	0	1	223	trigonal	166	R-3m (166)	7.319102	15.503815	113.474005	7	0	7.428571	104.70515	104.543148	104.624149	55.623152	54.231338	54.927245	0.129872	140.23994	0	-0.928477	0.371391	0	0	-1	126.510614	179.388156	138.682579	10.469998	0.075496	179.388156	131.189146	1.367401	171.93022	77.37747	59.94679	-2.77711	0.01061	-0.00292	77.37747	171.5406	58.36582	2.87668
Co5La1P3	icsd_086373	Co			0	1	0	135	orthorhombic	63	Cmcm (63)	7.430959	13.072361	97.140178	18	0	7.555556	180.615671	180.476029	180.54585	104.661765	95.540746	100.101255	0.47811	253.461057	0	-0.668965	0.743294	0	-1	0	173.314173	340.045671	244.142821	35.258319	0.144417	340.045671	277.256431	1.226466	313.66429	94.02079	125.57456	0.02399	-0.12108	0.41088	94.02079	376.84204	86.15235	0.01606
Cr1F4Na1	icsd_037108	F			1	0	0	114	monoclinic	14	P2_1/c (14)	3.123758	13.376372	41.784548	24	0.1941	3.583333	41.851177	38.369913	40.110545	27.479244	20.632194	24.055719	1.750041	60.143716	-0.762001	0.635001	0.127	-0.141421	0	0.989949	29.430545	125.495323	54.303557	16.03731	0.295327	56.749221	77.996175	0.72759	70.00935	23.75414	18.05875	0.87138	9.00621	4.98524	23.75414	79.68688	8.63705	-0.62943
Cr1Hf1Si2	icsd_626159	Si			0	0	1	112	orthorhombic	55	Pbam (55)	7.903883	15.056057	119.001308	48	0	10.041667	167.091954	166.034904	166.563429	103.630963	101.211828	102.421396	0.125875	254.997427	-0.707107	-0.707107	0	0	0	-1	208.530355	290.093912	252.150097	21.87907	0.08677	290.093912	228.672901	1.268598	301.77587	85.78358	104.78437	0.00638	-0.02695	-0.00622	85.78358	295.99281	92.07922	-0.01853
Cr1K1O2	icsd_040267	K	O		0	0	1	112	trigonal	166	R-3m (166)	4.213582	12.127509	51.100258	4	0	6	109.803819	107.729354	108.766586	65.668459	45.45596	55.56221	2.242562	142.43316	-0.704361	-0.35218	0.616316	0	-0.948683	0.316228	64.471757	241.059818	125.087798	37.503254	0.299815	208.383701	156.175314	1.334293	193.3418	55.9058	62.93	11.29928	-0.18055	0.53271	55.9058	232.08615	46.12699	-36.09195
Cr1La1O3	icsd_091270	Cr			0	1	0	113	orthorhombic	62	Pnma (62)	6.58933	12.040748	79.340467	20	0	4.65	169.304151	166.155702	167.729927	78.377133	76.746172	77.561652	0.125206	201.60896	-0.995037	0	0.099504	-0.40161	-0.722897	0.562254	162.862255	222.776469	203.67181	12.464106	0.061197	198.578447	191.548771	1.036699	228.57495	110.48772	119.87852	-0.03991	1.35428	-0.04973	110.48772	286.21478	138.73669	-0.01097
Cr1La1O3	icsd_173469	Cr			0	0	1	113	orthorhombic	62	Pbnm (62)	6.592502	12.034956	79.340467	20	0	7.1	169.469614	167.177037	168.323326	64.874595	57.841171	61.357883	0.621708	164.130485	-0.545455	0.818182	-0.181818	-0.264906	0.264906	-0.927173	99.543802	212.896023	158.722861	29.196893	0.183949	190.578791	149.946035	1.270983	282.59668	133.3482	124.31663	1.8024	2.48024	7.43967	133.3482	235.56863	107.97689	2.96334
Cr1N2W1	icsd_084639	Cr			0	0	1	112	trigonal	160	R3m (160)	11.23105	9.752702	109.533082	4	0	6.5	271.781597	265.945327	268.863462	174.71259	166.911666	170.812128	0.25563	422.882338	-0.341882	0.911685	-0.227921	-0.398015	0.199007	0.895533	341.06212	503.446259	418.664657	38.86796	0.092838	459.376733	390.459678	1.176502	471.01175	181.9028	149.39817	3.50449	11.85232	16.42393	181.9028	489.8723	147.3931	28.4374
Cr1Na1O2	icsd_024595	Na			0	0	1	112	trigonal	166	R-3m (166)	4.40444	10.083698	44.413048	4	0	7.5	116.949963	112.30301	114.626487	74.185736	65.023943	69.60484	0.745872	173.663242	0	-0.894427	0.447214	-0.846649	0.376288	-0.376288	102.484057	239.540837	168.600432	31.124317	0.184604	224.254733	159.298085	1.407768	235.53426	73.12757	67.18957	-21.09143	0.26965	-13.72284	73.12757	174.2842	54.90041	26.84348
Cr1Na1Se2	icsd_042392	Na	Cr		0	0	1	112	trigonal	166	R-3m (166)	4.86973	19.854759	96.687307	4	0	6	54.313783	53.812952	54.063368	30.551378	24.201242	27.37631	1.321251	70.268247	-0.09759	0.19518	0.9759	-0.814822	0.362143	0.452679	37.718305	97.217746	67.016921	13.606753	0.203035	38.996225	72.389088	0.538703	110.47181	15.38896	45.92894	9.85443	-1.16292	0.53604	15.38896	104.10953	40.42875	-10.96536
Cr1Nb1P1	icsd_053189	Nb			1	0	0	111	orthorhombic	62	Pnma (62)	7.02217	13.863203	97.349774	12	0	9.083333	218.879919	218.375573	218.627746	104.123313	93.691491	98.907402	0.559021	257.839872	-0.371391	0.928477	0	-0.08165	-0.571548	0.816497	172.541122	323.689859	254.813682	37.182113	0.145919	208.178915	278.610607	0.747204	332.31457	180.67062	149.98728	0.18292	1.01064	-11.49509	180.67062	317.66689	141.81374	-0.18036
Cr1O3Sc1	icsd_085141	Cr			0	0	1	113	orthorhombic	62	Pbnm (62)	4.661285	10.327429	48.13909	20	0	4.75	198.338467	180.572812	189.455639	79.730786	73.139584	76.435185	0.548976	202.123552	-0.691714	0.691714	0.207514	0	-0.948683	0.316228	149.298807	268.481665	194.761067	28.762815	0.147683	167.802772	204.737254	0.819601	314.74683	169.60201	103.99541	1.90061	-0.16685	2.90863	169.60201	392.29302	145.60977	-0.45111
Cr1O3Y1	icsd_109352	Cr			0	0	1	113	orthorhombic	62	Pbnm (62)	5.514124	11.377185	62.735205	20	0	4.65	187.910628	187.214257	187.562442	84.550339	82.44633	83.498334	0.131318	218.126727	0	-1	0	0	-0.6	-0.8	187.516247	251.236694	219.359412	15.683219	0.071496	226.838024	207.714671	1.092065	279.91637	154.47444	116.86725	-0.00788	-0.03369	-3.85408	154.47444	293.63392	137.0256	0.00103
Cr1O4Sr2	icsd_245595	Sr	O		0	0	1	124	tetragonal	139	I4/mmm (139)	5.27133	13.106068	69.086408	7	0	6.857143	136.725001	134.760222	135.742612	86.076347	83.213209	84.644778	0.186616	210.23559	-0.212	-0.212	0.953998	-1	0	0	179.182958	260.508423	206.380291	20.614506	0.099886	179.625358	240.562483	0.746689	292.73315	61.99472	76.98362	-0.08722	-0.06351	0.46542	61.99472	292.71471	77.02887	0.08811
Cr1O5Pb2	icsd_710043	O			1	0	0	125	monoclinic	12	C2/m (12)	6.430391	17.637086	113.413367	16	1.8043	2.5	29.641722	26.124363	27.883043	15.808547	8.465139	12.136843	4.472081	31.797026	-0.771517	0.617213	0.154303	-0.911322	-0.390567	-0.130189	9.326172	59.887238	26.97774	11.637496	0.431374	24.547152	27.339515	0.897863	52.48151	17.49316	19.37056	-2.51701	3.55533	10.84269	17.49316	53.35606	14.83026	-5.53616
Cr1Se2Tl1	icsd_626736	Tl	Se		0	0	1	112	trigonal	160	R3m (160)	7.358429	23.373204	171.990055	4	0	5.5	43.155101	40.519744	41.837422	17.629865	4.241996	10.93593	15.845193	30.178341	-0.309426	-0.721995	0.618853	-0.19518	0.9759	0.09759	5.368053	89.887712	16.463255	13.482007	0.818915	47.410198	47.068824	1.007253	93.34419	38.73888	11.29029	3.46497	-0.51056	2.16622	38.73888	101.81073	10.25073	8.04805
Cr1Si2Zr1	icsd_020554	Si			0	0	1	112	orthorhombic	55	Pbam (55)	5.395799	15.340484	82.774164	48	0	10.145833	161.360033	160.5083	160.934167	111.236044	110.436473	110.836258	0.041507	270.427201	-0.640184	-0.768221	0	0	0	-1	253.978768	316.68566	268.16009	12.570322	0.046876	316.68566	260.562276	1.215393	310.87998	83.16546	86.78388	-0.00676	-0.00472	-0.02088	83.16546	294.17036	77.72612	-0.00692
Cr1Te2Tl1	icsd_079007	Tl			0	0	1	112	trigonal	164	P-3m1 (164)	7.705638	27.560906	212.374358	4	0	6	37.993223	34.492459	36.242841	15.008874	0.789472	7.899173	90.157917	22.09249	-0.505076	-0.808122	0.303046	-0.242536	0	0.970143	0.550489	61.214823	7.946283	10.199685	1.283579	24.719772	3.951626	6.255595	46.39954	29.01525	27.45038	-1.68103	-0.134	2.46513	29.01525	42.07824	29.85174	1.63216
Cr2Ga1N1	icsd_053124	Cr	Ga		0	0	1	112	hexagonal	194	P6_3/mmc (194)	6.893007	11.305643	77.929874	8	0	7.375	179.857006	178.183627	179.020316	70.998631	68.61472	69.806676	0.183108	185.330893	-0.124035	0.992278	0	-0.874157	-0.485643	0	144.733278	226.287494	184.287363	16.847392	0.091419	211.435607	181.246144	1.166566	281.23693	132.33382	120.14626	-0.02409	-0.01112	12.6295	132.33382	237.57438	142.95782	-0.02851
Cr2La3N6	icsd_162677	La	N		0	0	1	236	tetragonal	139	I4/mmm (139)	6.481561	14.084834	91.291714	11	0	7.909091	124.237443	122.873033	123.555238	77.184634	58.051893	67.618263	1.659004	171.558441	0	-0.970143	0.242536	-0.644658	0.725241	0.241747	80.138102	248.275901	172.386267	43.361156	0.251535	233.258307	154.323929	1.511485	175.35086	123.38293	62.53067	-5.47046	-4.25423	3.03554	123.38293	181.94045	64.10646	19.54648
Cr2O4Sr1	icsd_006132	Sr			1	0	0	124	orthorhombic	59	Pmmn (59)	4.920498	12.323086	60.635712	28	0.7535	5.035714	127.774016	126.817878	127.295947	62.758293	47.861211	55.309752	1.563819	144.93759	-0.703526	0.703526	-0.100504	-1	0	0	73.976873	242.134328	130.058167	35.125581	0.270076	242.134328	186.985017	1.29494	276.17388	61.99212	77.12906	-3.78157	0.11562	-0.05021	61.99212	234.2704	71.26111	2.84759
Cr2Si2Y1	icsd_626847	Y	Cr		0	0	1	122	tetragonal	139	I4/mmm (139)	5.114617	16.172817	82.717763	5	0	11.6	135.636172	131.4079	133.522036	62.353555	48.302023	55.327789	1.486726	145.839442	0	-1	0	-0.768221	0.640184	0	68.992238	224.671974	141.452329	33.184878	0.234601	209.039365	148.229901	1.410238	216.08038	126.56586	77.80836	-0.74982	-0.52227	-0.47175	126.56586	152.20419	90.28585	-4.57768
Cr3Cs1O8	icsd_155503	Cr			1	0	0	138	orthorhombic	62	Pnma (62)	3.446206	16.739671	57.688356	48	0	5.208333	28.720269	16.977018	22.848643	19.453103	10.641305	15.047204	4.83209	37.015885	-0.743294	0	0.668965	0	-1	0	12.104783	102.503508	33.183329	19.391716	0.584381	23.729337	66.788258	0.355292	25.68438	15.14643	1.69888	-0.13552	0.1251	-0.16398	15.14643	118.37985	18.41689	0.61496
Cr3Cu1O8	icsd_155506	Cu			0	0	1	138	monoclinic	12	C2/m (12)	3.15869	15.224832	48.090518	12	0	2.583333	55.125211	19.847093	37.486152	26.186291	16.056156	21.121224	4.932091	53.344794	-0.485643	0	0.874157	0	-1	0	14.714536	112.451293	47.350263	21.896886	0.462445	23.958602	76.568013	0.312906	88.36911	48.68094	22.65397	-0.16415	18.12707	0.37616	48.68094	144.70723	29.72499	-0.14931
Cr3In1O8	icsd_155504	In			0	0	1	138	monoclinic	12	C2/m (12)	4.251004	12.981744	55.185446	12	0	3.333333	92.069442	81.232418	86.65093	47.346847	45.344188	46.345518	0.354236	117.99915	-0.986394	0	0.164399	-0.095346	-0.953463	-0.286039	83.412041	139.988589	117.692826	12.849829	0.109181	104.954029	113.816536	0.922133	114.27487	73.32495	40.83099	0.18121	6.12594	-0.30742	73.32495	205.6115	73.36208	0.51146
Cr3K1O8	icsd_246524	K			0	0	1	138	monoclinic	12	C2/m (12)	2.816331	15.87437	44.707488	12	0	6.583333	39.284406	26.590337	32.937372	23.031383	18.291409	20.661396	1.773077	51.264825	-0.664364	0	-0.747409	0	-1	0	28.466544	112.92194	49.367609	18.082363	0.36628	30.377949	73.345071	0.414178	58.76939	31.46446	12.33051	0.00934	-5.71289	0.01833	31.46446	134.8103	19.04702	0.04085
Cr3Li1O8	icsd_155851	Li			0	0	1	138	monoclinic	12	C2/m (12)	3.219384	12.504759	40.257618	12	0	3.333333	56.396596	27.767501	42.082048	35.993423	22.935556	29.46449	3.877672	71.667133	-0.099504	0	-0.995037	0	-1	0	21.969416	166.527031	68.828343	31.165995	0.452808	22.367796	104.033236	0.215006	97.68454	48.78302	22.78602	-0.21358	0.55656	-0.64406	48.78302	194.99588	21.17624	-0.37429
Cr3Na1O8	icsd_082620	Na			0	0	1	138	monoclinic	12	C2/m (12)	3.040242	13.972053	42.478418	12	0	3.166667	48.465852	30.689415	39.577634	29.598985	22.934287	26.266636	2.032235	64.525322	-0.447214	0	-0.894427	0	-1	0	29.814798	137.452394	62.776514	24.013542	0.382524	33.613601	88.881725	0.378183	76.24788	39.63862	15.76767	0.06296	-6.42347	-0.05122	39.63862	164.10222	22.92806	0.06331
Cr3O8Rb1	icsd_082622	Rb			0	0	1	138	monoclinic	12	C2/m (12)	3.053803	16.741099	51.124018	12	0	6.5	37.089251	25.269572	31.179411	21.664303	17.458232	19.561267	1.672353	48.53407	-0.707107	0	-0.707107	0	-1	0	27.540951	106.559648	46.660476	16.339132	0.350171	28.944498	68.982208	0.419594	57.93218	29.32712	11.31079	-0.08985	-6.8767	0.06556	29.32712	126.27368	17.88045	-0.0028
Cr3O8Tl1	icsd_155505	Tl			0	0	1	138	monoclinic	12	C2/m (12)	4.126265	16.377848	67.579334	12	0	7.083333	40.928732	23.435133	32.181933	20.629853	13.99442	17.312137	3.117212	44.039461	-0.789352	0	0.613941	0	-1	0	15.228455	101.942083	41.779705	18.399316	0.440389	30.998878	59.658018	0.51961	56.60663	33.72948	14.70636	-0.04007	14.17395	-0.00183	33.72948	132.77055	22.65771	-0.08985
Cr3Rb1S5	icsd_073143	S			3	0	-2	135	monoclinic	12	C2/m (12)	4.0362	18.366368	74.130344	18	0	7.055556	54.023969	53.039139	53.531554	34.306613	32.475094	33.390854	0.300556	82.929793	-0.970143	0.242536	0	-0.298142	-0.745356	-0.596285	64.645928	110.865606	83.27777	10.355505	0.124349	82.67502	95.739469	0.863542	82.5173	25.18852	39.14108	0.78261	-0.1337	1.52108	25.18852	107.16121	36.24995	1.38404
Cs1Cu3O2	icsd_413342	Cs			0	0	1	123	trigonal	164	P-3m1 (164)	4.440097	22.161365	98.398616	6	1.7591	10	16.557258	15.689363	16.123311	7.179759	5.866336	6.523047	1.174775	17.2437	0	-0.752577	0.658505	-0.858116	0.476731	-0.190693	10.495071	25.510691	15.969967	3.966326	0.248362	18.902344	22.156409	0.853132	31.84667	14.14555	8.95642	-1.99805	-0.09939	-0.04033	14.14555	31.30104	8.67838	2.14999
Cs1Cu3S2	icsd_023326	Cs	Cu		0	0	1	123	trigonal	164	P-3m1 (164)	3.722757	28.820343	107.291134	6	2.3914	4	14.18016	13.87733	14.028745	8.132454	5.705498	6.918976	2.148679	17.826287	0	-0.894427	-0.447214	0	-0.857493	0.514496	10.868706	31.895166	16.575429	5.116761	0.308696	11.273422	14.885144	0.757361	25.42003	8.80516	10.44447	5.01933	0.04544	0.0339	8.80516	25.31637	10.38276	-5.13248
Cs1Cu4S3	icsd_023325	Cs			0	0	1	134	tetragonal	123	P4/mmm (123)	5.202463	19.282034	100.314072	8	0	10.75	44.642379	43.352889	43.997634	22.887043	21.108873	21.997958	0.450934	56.566494	0	0	-1	0	-1	0	42.157817	79.444285	54.470948	7.0176	0.128832	42.157817	59.356275	0.71025	92.22355	19.45157	30.34202	-0.10467	-0.13335	-0.13705	19.45157	94.21118	28.97923	-0.10203
Cs1Cu4Se3	icsd_075196	Cs			0	0	1	134	tetragonal	123	P4/mmm (123)	5.958003	21.738104	129.515684	8	0	10.75	38.10427	37.557962	37.831116	18.179494	15.092791	16.636142	1.037121	43.527985	-0.707107	0.707107	0	0	-1	0	26.035921	64.372097	40.228964	8.179394	0.203321	36.837145	38.826203	0.94877	77.55602	15.24855	26.25132	0.02655	-0.07259	0.26022	15.24855	77.88092	26.38252	0.02389
Cs1Cu5S3	icsd_094418	Cs	S		0	1	0	135	orthorhombic	51	Pmcm (51)	5.219486	19.329983	100.892575	18	0.7309	14.388889	32.359248	29.59756	30.978404	14.949207	9.674647	12.311927	2.819278	32.614991	0	-0.743294	0.668965	-1	0	0	16.375614	77.506291	28.141304	11.884964	0.422332	29.193862	54.583403	0.534849	84.91189	15.48163	16.08621	0.11798	-0.20208	0.03208	15.48163	37.76629	21.42844	0.12338
Cs1F2Li1	icsd_018020	Cs	F		0	1	0	112	monoclinic	15	C2/c (15)	3.923907	18.815151	73.828907	16	6.286	7.5	28.3286	27.216806	27.772703	11.591492	9.610037	10.600764	1.07178	28.21272	-0.523205	0.672692	-0.523205	-0.986394	0	0.164399	18.325746	52.167056	25.616384	6.025219	0.23521	32.75744	36.163405	0.905817	58.97609	13.90046	19.36309	-0.01596	-4.44421	0.03698	13.90046	39.95691	17.83534	-0.03228
Cs1F3Li2	icsd_245967	Li			0	0	1	123	tetragonal	139	I4/mmm (139)	3.975464	14.186561	56.398169	6	7.0015	10.666667	45.126173	43.929894	44.528033	26.41599	12.663317	19.539653	5.457355	51.138774	0	-1	0	-0.707107	0.707107	0	16.401703	119.720367	45.48398	19.935926	0.438307	73.336739	51.63792	1.420211	69.10328	60.30117	17.33884	0.03541	0.30693	-0.03884	60.30117	69.09583	17.3368	0.30426
Cs1F4Fe1	icsd_006043	Cs			0	0	1	114	tetragonal	129	P4/nmm (129)	4.636622	15.802373	73.269631	24	0	9.666667	47.629099	46.803009	47.216054	30.659893	28.064207	29.36205	0.480105	72.961966	-0.408248	-0.408248	-0.816497	0	-1	0	60.787308	106.38459	69.345474	9.304542	0.134177	62.94573	82.678906	0.761328	112.83975	10.74874	26.1162	0.03262	0.0215	-0.00207	10.74874	115.71776	26.23394	-0.03304
Cs1F4Ti1	icsd_027230	Cs			0	0	1	114	tetragonal	129	P4/nmm (129)	3.902751	18.208095	71.061668	24	0	10.333333	39.253138	35.654723	37.45393	19.148283	14.561121	16.854702	1.676064	43.96864	-0.539164	0.539164	-0.646997	0	-1	0	29.062312	83.297385	37.747604	9.688129	0.256655	53.668704	54.173472	0.990682	93.81045	29.63799	12.41252	-0.22647	-0.17673	-0.04016	29.63799	94.03639	12.56813	0.13741
Cs1F4V1	icsd_167354	Cs			0	0	1	114	orthorhombic	59	Pmmn (59)	4.113696	17.481251	71.912556	24	0.8117	9.708333	35.978542	35.9222	35.950371	20.127267	17.163349	18.645308	0.865012	47.691086	-0.696311	0.696311	0.174078	0	-1	0	36.929642	71.238195	43.494379	6.349513	0.145985	47.496185	48.75615	0.974158	80.23984	1.14691	25.93285	-0.03249	-0.01253	0.00801	1.14691	80.86398	23.12964	-0.02108
Cs1Fe2Sb2	icsd_658698	Cs	Fe		0	0	1	122	tetragonal	139	I4/mmm (139)	6.117984	26.496788	162.106928	5	0	7.6	24.57323	24.403647	24.488438	18.611736	16.4254	17.518568	0.672484	42.436322	0	0	-1	-0.59655	-0.536895	0.59655	24.580078	56.636184	43.273679	6.410731	0.148144	24.580078	37.59846	0.653752	45.64079	10.37427	19.55626	0.00999	-0.05508	2.02777	10.37427	42.9568	17.69209	-0.32598
Cs1Ga1Te2	icsd_402613	Cs	Ga	Te	0	0	1	112	monoclinic	15	C2/c (15)	4.575428	41.539388	190.060475	32	1.2853	6.90625	15.5141	15.498339	15.506219	8.107062	7.010906	7.558984	0.782768	19.507163	-0.847998	0	0.529999	-0.707107	0.707107	0	15.111837	29.873866	18.973513	3.412511	0.179857	20.440716	22.748325	0.898559	23.92667	13.11682	9.93701	0.04439	0.18816	-0.01121	13.11682	23.90186	9.95183	0.04668
Cs1I2Li1	icsd_245986	Cs			0	1	0	112	orthorhombic	36	Cmc2_1 (36)	3.869867	42.228846	163.420011	16	3.7636	7.25	11.551401	11.512791	11.532096	5.576735	5.527334	5.552034	0.048042	14.352762	-0.613941	0	0.789352	-1	0	0	13.179234	16.380647	14.168168	0.681461	0.048098	16.01522	14.107502	1.135227	20.45165	7.57109	7.23507	-0.00516	-0.00111	-0.00161	7.57109	20.41868	7.67168	0.0083
Cs1I3Li2	icsd_245988	Cs			0	0	1	123	tetragonal	115	P-4m2 (115)	3.732068	39.117533	145.989273	6	3.9689	8	12.895948	12.895891	12.89592	6.312185	5.826259	6.069222	0.417018	15.738634	0	0	-1	-0.847998	0	-0.529999	11.433788	19.110651	15.494175	1.90302	0.122822	11.433788	13.933828	0.820578	22.8502	5.79295	10.06683	-0.00106	0.00129	0.0091	5.79295	22.84635	10.06808	0.00071
Cs1I4Li3	icsd_245989	Cs			0	0	1	134	monoclinic	6	Pm (6)	3.564487	38.511549	137.273904	16	3.7127	5	11.853931	10.810678	11.332304	4.683449	4.256309	4.469879	0.598275	11.851423	-0.894427	0	0.447214	-0.092057	0.828517	0.552345	7.496358	16.002292	11.750571	2.193788	0.186696	11.836901	10.708082	1.105418	13.62874	7.26748	9.49642	0.00184	1.5941	0.00101	7.26748	20.4717	9.59412	0.00086
Cs1In1S2	icsd_415553	Cs	In	S	0	0	1	112	monoclinic	15	C2/c (15)	3.875351	33.406311	129.461188	32	2.1777	7.28125	21.576252	21.549383	21.562818	11.191501	10.341952	10.766727	0.411976	27.691256	-1	0	0	-0.707107	-0.707107	0	22.043672	36.887775	27.595342	3.320417	0.120325	28.84141	29.596076	0.974501	32.37973	16.83715	14.56883	0.02506	0.01528	-0.00157	16.83715	32.38368	14.57138	0.02576
Cs1In3S5	icsd_412365	S			0	0	1	135	monoclinic	10	P2/m (10)	4.4187	26.626731	117.655529	27	1.2191	7.111111	33.628003	31.664648	32.646325	18.910198	15.781965	17.346081	1.053083	44.208438	-0.721995	-0.618853	0.309426	0	-1	0	27.175696	85.301433	41.459242	9.584011	0.231167	42.982548	41.183801	1.043676	48.28926	11.85434	21.72657	-0.00501	2.94304	0.00084	11.85434	93.39838	19.25123	-0.01007
Cs1In5S8	icsd_040878	S			2	0	-1	158	monoclinic	12	C2/m (12)	4.51933	25.287486	114.282484	14	1.3447	7.357143	37.031592	34.763012	35.897302	16.048817	9.266863	12.65784	3.724509	33.979637	-0.704361	-0.704361	-0.088045	0	-1	0	12.807323	69.709687	27.281932	10.858413	0.398007	46.585487	33.937379	1.37269	79.37875	27.82444	15.78495	0.01668	-3.52301	-0.11218	27.82444	82.33859	15.3878	0.03368
Cs1La1S2	icsd_073532	Cs	La	S	0	0	1	112	trigonal	166	R-3m (166)	4.130017	33.767589	139.460732	4	2.7555	6	35.407821	35.237017	35.322419	20.536495	18.910782	19.723638	0.434685	49.88571	0	-0.789352	-0.613941	0	-0.948683	0.316228	37.258345	63.59402	48.428865	6.879452	0.142053	50.127906	54.689546	0.91659	67.88784	21.43927	20.18761	5.61296	-0.00089	-0.00064	21.43927	67.88902	20.19252	-5.61816
Cs1Na1S1	icsd_041323	Cs	Na	S	0	0	1	111	tetragonal	129	P4/nmm (129)	3.33721	31.175268	104.038412	6	2.412	9.666667	20.099552	20.035119	20.067335	11.128065	10.170247	10.649156	0.474108	27.145662	0	0	-1	0	-0.989949	0.141421	17.477652	30.071294	26.80661	3.047425	0.113682	17.477652	29.345355	0.595585	38.51578	7.68096	15.24359	-0.01254	-0.01131	0.0051	7.68096	38.51342	15.24084	-0.01164
Cs1Na1Se1	icsd_041322	Cs	Na	Se	0	0	1	111	tetragonal	129	P4/nmm (129)	3.73571	34.798045	129.995401	6	2.0275	10	17.536978	17.518603	17.527791	9.643739	8.860594	9.252167	0.442974	23.603423	0	0	-1	0	-1	0	16.165969	26.315762	23.200646	2.479123	0.106856	16.165969	25.779431	0.627088	33.35564	6.58772	13.24922	-0.02194	-0.01663	0.00232	6.58772	33.35548	13.2469	-0.021
Cs1Na1Te1	icsd_107569	Cs	Na	Te	0	0	1	111	tetragonal	129	P4/nmm (129)	3.777871	41.536165	156.91827	6	1.9702	10	14.54509	14.539523	14.542306	7.800408	7.146028	7.473218	0.458246	19.140857	0	0	-1	0	-1	0	13.422006	21.387605	18.744374	2.007559	0.107102	13.422006	21.079942	0.636719	27.26453	5.58068	11.0782	-0.00375	0.00736	0.00169	5.58068	27.26696	11.08022	-0.00289
Cs1O2Y1	icsd_049652	Cs	O		0	0	1	112	hexagonal	187	P-6m2 (187)	5.423361	19.42806	105.365379	8	2.9734	8.875	75.184612	73.260547	74.22258	44.246439	33.225418	38.735929	1.684786	98.987613	-0.618853	0.309426	0.721995	-1	0	0	63.649334	150.836368	88.762657	27.783026	0.313004	126.527165	150.807937	0.838995	168.13826	49.29893	27.11416	0.00475	0.00115	-0.0049	49.29893	168.1404	27.1315	0.00601
Cs1O8V3	icsd_023976	Cs			1	0	0	138	monoclinic	11	P2_1/m (11)	3.598034	15.911623	57.250555	24	2.0216	6.875	25.250857	19.097572	22.174214	16.260094	6.842886	11.55149	7.203224	29.527154	-0.741249	-0.667124	0.074125	-0.07785	0.622799	0.778499	8.197383	69.191144	23.494793	14.869157	0.63287	25.889994	57.295498	0.451868	37.77469	6.17249	8.60251	-0.06547	9.79546	-0.38953	6.17249	47.98419	22.41516	-0.12059
Cs2F3Li1	icsd_245963	Cs			0	1	0	123	orthorhombic	63	Ccmm (63)	3.875133	23.55007	91.259645	12	5.3177	7	19.598402	14.360603	16.979503	10.935895	8.870649	9.903272	1.528823	24.873923	-0.842152	-0.336861	0.421076	0	0	-1	14.240387	43.621909	24.451638	8.195418	0.335168	20.456943	22.302004	0.917269	25.87614	14.06117	8.96226	-0.00914	0.0101	-8.41683	14.06117	30.06007	12.49387	-0.01582
Cs2F4Hg1	icsd_072353	Cs	F		0	0	1	124	tetragonal	139	I4/mmm (139)	5.435562	23.671284	128.666733	7	2.0989	7.857143	29.324398	28.71575	29.020074	11.364517	10.519278	10.941897	0.422953	29.160716	-0.59655	0.59655	0.536895	0	0	-1	23.734819	38.374804	27.393248	3.14503	0.11481	38.374804	30.406579	1.262056	47.31552	13.76218	21.91414	0.0138	0.06213	0.0059	13.76218	47.30972	21.91874	0.02796
Cs2F5Li3	icsd_245966	F			0	0	1	235	orthorhombic	38	Cm2m (38)	3.692177	17.163443	63.370464	10	5.6182	7.5	31.387302	28.064534	29.725918	16.094339	11.913125	14.003732	1.873274	36.309461	-1	0	0	-0.650791	0.759257	0	20.737703	71.190961	34.801685	10.692925	0.307253	28.454161	45.42277	0.626429	45.41276	36.70143	18.15751	-0.07161	0.03172	-0.00605	36.70143	60.39709	15.60772	0.03052
Cs2Ge4Na2	icsd_409262	Na			1	0	-1	224	monoclinic	14	P2_1/c (14)	3.736293	33.46319	125.028284	32	0.9622	9.34375	14.929073	14.921199	14.925136	7.75766	7.408343	7.583001	0.236287	19.454295	-0.110432	0	-0.993884	-0.529813	0.662266	-0.529813	15.792978	23.466585	19.508542	1.950066	0.09996	18.487494	21.861993	0.845645	24.20153	9.12763	10.9203	0.00096	1.18767	-0.18103	9.12763	25.13363	10.9362	-0.01013
Cs2Hg3I8	icsd_004074	I			0	0	1	238	monoclinic	8	Cm (8)	4.574642	52.572252	240.499238	13	1.7993	4.307692	3.823522	3.284408	3.553965	2.018195	1.677033	1.847614	1.181305	4.724182	-0.613941	0	0.789352	0	-1	0	2.717015	7.634256	4.413248	1.165972	0.264198	3.970255	6.617124	0.599997	8.52925	2.78805	1.1874	-0.00848	-0.16698	0.04158	2.78805	9.29804	2.06889	-0.01129
Cs2Mn3S4	icsd_041889	Cs	Mn		0	0	1	234	orthorhombic	72	Icma (72)	4.644207	22.203293	103.116698	18	0	9.888889	46.147836	45.449786	45.798811	28.899171	27.884876	28.392024	0.197231	70.589284	-0.164399	0	-0.986394	-1	0	0	58.743831	94.403834	69.52246	7.256196	0.104372	58.921797	80.289147	0.73387	104.85691	21.47037	24.90019	-0.00837	1.04442	0.00465	21.47037	89.92658	28.32768	-0.011
Cs2Mn3S4	icsd_065253	Cs			0	0	1	234	orthorhombic	72	Icma (72)	4.645655	22.196375	103.116698	18	0	8.388889	46.135788	45.391136	45.763462	28.889607	27.895424	28.392515	0.194603	70.58096	-0.110432	0	0.993884	-1	0	0	58.720294	94.104434	69.515132	7.24184	0.104176	58.793331	80.288976	0.732272	104.72882	21.59617	25.03214	-0.01435	-1.09446	0.01339	21.59617	90.52608	27.94918	-0.02356
Cs2Mn3Se4	icsd_078932	Cs	Mn		0	0	1	234	orthorhombic	72	Icma (72)	5.479914	25.13288	137.726016	18	0	8.388889	35.608497	35.486985	35.547741	22.89462	22.420887	22.657753	0.10907	56.062125	0	0	-1	-0.957826	0	0.287348	44.60069	64.727448	56.121818	3.640956	0.064876	44.60069	57.124286	0.780766	73.72311	16.01018	22.6282	-0.00246	-0.54005	0.00537	16.01018	65.92551	23.28836	-0.00176
Cs2Ni3S4	icsd_063010	Cs	S		0	0	1	234	hexagonal	194	P6_3/mmc (194)	4.059221	25.915155	105.195335	18	1.258	11.388889	24.357136	15.57311	19.965123	10.743393	6.465543	8.604468	3.872243	22.570905	-0.622799	0.07785	0.778499	0	-1	0	11.000286	45.097641	19.565259	10.218345	0.52227	16.657745	44.65577	0.373026	57.21042	27.26154	7.00506	-0.0244	0.19739	0.00028	27.26154	59.38054	8.04482	-0.03414
Cs2Pd3Se4	icsd_033892	Cs	Se		0	1	0	234	orthorhombic	69	Fmmm (69)	5.348256	31.079654	166.221944	9	1.3551	12.222222	18.373556	11.688437	15.030996	7.335915	3.051555	5.193735	7.591904	13.971941	-0.668965	-0.743294	0	-1	0	0	3.282125	32.857255	11.432182	7.390364	0.646453	11.105514	28.809801	0.385477	43.64051	7.06798	19.85159	-0.04744	0.00081	-0.05401	7.06798	12.76091	7.22764	-0.04773
Cs2Pd3Se4	icsd_041884	Cs			0	1	0	234	orthorhombic	69	Fmmm (69)	5.348089	31.080626	166.221944	9	1.3551	12.333333	18.416934	11.751689	15.084312	7.336145	3.066424	5.201284	7.529226	13.995264	0	-0.743294	-0.668965	0	0	-1	3.317626	32.826098	11.463018	7.383728	0.644135	11.153778	28.801269	0.387267	40.69984	7.27708	19.89361	0.00413	-0.0133	-0.01504	7.27708	12.82886	7.11661	-0.01964
Cs2Pt3S4	icsd_026266	Cs			0	1	0	234	orthorhombic	69	Fmmm (69)	6.351112	28.450026	180.689296	9	2.0544	12.444444	26.947396	13.975331	20.461364	9.564981	2.661801	6.113391	13.895338	16.679064	-0.707107	0.707107	0	-1	0	0	2.603832	41.667009	12.203872	9.993558	0.818884	13.506289	37.989204	0.35553	62.1538	7.74869	35.1597	-0.01022	-0.00114	0.01296	7.74869	14.93448	8.79516	-0.01597
Cs2Pt3Se4	icsd_033893	Cs	Se		0	1	0	234	orthorhombic	69	Fmmm (69)	6.882175	31.283513	215.298614	9	1.6828	12.444444	21.981546	11.797013	16.889279	8.042249	3.735919	5.889084	6.626729	15.82762	-0.668965	-0.743294	0	-1	0	0	4.380308	35.026753	12.938738	7.878171	0.608882	11.591589	31.858139	0.36385	51.59366	6.77261	28.17844	0.01873	-0.00128	-0.00891	6.77261	12.72993	6.6493	0.01574
Cs2Pt4Se6	icsd_069440	Cs	Pt	Se	0	0	1	246	trigonal	166	R-3m (166)	7.0624	29.780532	210.32203	12	1.1622	9.916667	27.591237	20.023517	23.807377	14.674834	9.570418	12.122626	3.044709	31.090776	0	-0.6	0.8	-0.854358	-0.512615	0.085436	16.23958	58.122629	28.049305	13.003677	0.463601	19.754917	57.294129	0.344798	67.97263	21.32523	11.70665	-1.83837	0.00535	0.00799	21.32523	68.0192	11.71934	1.87762
Cs2S4Zn3	icsd_053242	Cs			0	0	1	234	orthorhombic	72	Icma (72)	4.082689	26.672726	108.896455	18	2.7127	10.333333	27.18371	26.752	26.967855	15.586696	14.694568	15.140632	0.319694	38.261482	-0.640184	0	-0.768221	-0.743294	0.668965	0	29.886077	51.601599	37.978524	5.196306	0.136822	34.12249	45.38561	0.751835	50.33011	20.61568	14.18846	0.00777	-0.02576	-0.10236	20.61568	48.7277	17.29554	0.00728
Cs2S8Sb4	icsd_067976	S			0	1	0	248	triclinic	2	P-1 (2)	3.747062	31.950734	119.721395	14	1.4614	7.214286	11.971333	5.336759	8.654046	8.58395	4.843788	6.713869	5.103966	16.003155	-0.099504	0	0.995037	-0.562254	0.722897	-0.40161	3.808098	36.375405	15.745124	7.696933	0.488846	14.81412	13.059836	1.134327	34.00997	9.74474	7.83534	-1.06854	0.72603	3.16767	9.74474	22.69205	4.87599	-5.94571
Cs3Cu8Se6	icsd_014012	Cs	Cu		2	0	-1	368	monoclinic	12	C2/m (12)	5.771106	23.371458	134.879153	17	0	10.411765	30.012149	29.535314	29.773732	15.856857	13.9249	14.890879	0.709851	38.289356	-0.707107	0	0.707107	0	-1	0	25.346707	60.613373	35.846823	6.678629	0.18631	29.173945	39.202164	0.744192	48.83825	18.92836	16.56921	-0.07902	0.84392	-0.10158	18.92836	68.99635	12.34086	-0.16333
Cu1F4K2	icsd_038426	K	F		0	0	1	124	orthorhombic	64	Cmce (64)	3.289788	15.700509	51.651347	14	0	7.714286	41.305197	40.44873	40.876964	17.085754	13.400597	15.243176	1.396171	40.673731	-0.707107	-0.707107	0	0	-1	0	20.652471	60.956673	37.055065	9.441361	0.254793	44.132691	33.280501	1.326083	75.55996	27.83901	25.55569	-0.117	-0.00744	-0.23732	27.83901	77.65899	27.14808	-0.11502
Cu1F4K2	icsd_056884	K	F		0	0	1	124	tetragonal	140	I4/mcm (140)	3.289451	15.702116	51.651347	28	0	7.607143	40.40862	39.482415	39.945517	17.20843	13.693306	15.450868	1.306978	41.058778	-0.707107	0.707107	0	0	-1	0	21.44336	60.935727	37.504731	9.163921	0.24434	44.078865	34.069986	1.293774	76.08454	27.23132	25.12317	-0.06019	0.03873	0.24765	27.23132	76.15408	25.19973	-0.05377
Cu1F6Sr2	icsd_026106	Cu			0	0	1	126	tetragonal	117	P-4b2 (117)	4.205202	15.478156	65.088769	36	0	4.75	64.599227	64.217111	64.408169	28.698356	27.979802	28.339079	0.134356	74.143112	-0.309426	0.928279	-0.206284	-0.235702	0.235702	-0.942809	59.600592	85.047441	73.85043	5.258565	0.071206	81.508119	73.486295	1.109161	97.0974	45.04031	43.3121	0.69105	-0.19517	-3.5142	45.04031	98.17802	48.69562	2.63829
Cu1Fe1S2	icsd_027653	Fe	Cu		0	0	1	112	tetragonal	115	P-4m2 (115)	4.542727	16.770967	76.185934	4	0	4	87.294349	86.323077	86.808713	24.889699	22.436626	23.663163	0.557919	65.076433	-0.123091	-0.984732	0.123091	-0.661693	0.735215	-0.147043	42.797525	96.515374	65.355983	11.00007	0.16831	60.377451	68.537244	0.880944	122.9813	82.61545	68.91613	-0.2751	1.30745	1.48012	82.61545	109.33831	69.83827	-0.73126
Cu1Ge2Hf1	icsd_627688	Hf	Cu	Ge	0	0	1	112	tetragonal	129	P4/nmm (129)	9.482035	16.957152	160.78831	8	0	10	113.32727	112.573098	112.950184	74.097636	71.811389	72.954513	0.165884	180.090137	0	0	-1	-0.707107	0.707107	0	145.272295	214.623668	180.874938	16.479501	0.09111	145.272295	199.157819	0.729433	215.76747	67.16765	68.87145	-0.0863	0.05993	-0.01164	67.16765	215.60083	68.84922	-0.11727
Cu1Ge2La1	icsd_627707	La	Ge		0	1	0	112	orthorhombic	63	Cmcm (63)	6.889378	20.953327	144.355398	8	0	10.75	76.900752	76.006969	76.453861	45.207271	37.55605	41.381661	1.030399	105.170084	0	0	-1	-0.383482	0.690268	-0.613572	51.895211	137.552727	107.355128	19.632574	0.182875	72.392337	87.395042	0.828335	119.95149	43.81548	50.74458	-0.07396	0.05063	1.39724	43.81548	128.93998	75.83009	-0.08622
Cu1Ge2Zr1	icsd_627883	Zr	Cu	Ge	0	0	1	112	tetragonal	129	P4/nmm (129)	7.244513	17.193863	124.561165	8	0	10	110.742812	109.852726	110.297769	61.389713	49.854746	55.62223	1.16496	142.853431	-0.707107	0.707107	0	0	-0.819232	-0.573462	66.719167	184.945759	134.983177	30.025133	0.222436	128.902511	111.511679	1.155955	207.21277	59.27137	72.82237	0.0331	0.0079	9.34988	59.27137	207.33067	72.78427	0.01286
Cu1Ge4Hf2	icsd_030733	Hf	Ge		0	1	0	124	orthorhombic	63	Cmcm (63)	9.521563	17.715967	168.683697	14	0	9.285714	109.099104	107.72576	108.412432	61.681783	55.510759	58.596271	0.568589	148.952783	0	-1	0	-0.683763	0.455842	-0.569803	85.685346	182.641725	151.969722	21.363113	0.140575	85.685346	149.544018	0.572977	186.26031	84.88748	72.77807	-0.17069	-0.04529	-1.15629	84.88748	138.99686	80.2724	-0.14527
Cu1Ge4Zr2	icsd_084200	Zr	Ge		0	1	0	124	orthorhombic	63	Cmcm (63)	7.072036	17.997823	127.281247	14	0	9.357143	108.224754	107.301156	107.762955	70.977099	65.480921	68.22901	0.428285	169.016645	0	-1	0	-0.593442	0.461566	0.65938	104.673578	198.714635	172.492356	21.077673	0.122195	104.673578	169.211104	0.618598	185.69254	83.64221	64.30022	-0.00217	-0.03931	0.16062	83.64221	150.86919	68.39725	-0.01067
Cu1Ge6La2	icsd_627710	La	Ge		0	0	1	126	orthorhombic	38	Cm2m (38)	6.332042	22.646121	143.396184	9	0	9.111111	65.152091	62.873998	64.013045	46.359199	44.553351	45.456275	0.238894	110.26803	-0.995037	0	-0.099504	-0.421076	0.336861	-0.842152	74.307335	127.364216	111.554074	11.683134	0.104731	110.853286	101.140824	1.096029	91.22813	32.54836	42.45204	0.05623	-1.80981	-0.26547	32.54836	132.08106	38.47887	0.49548
Cu1Ge6Y2	icsd_627877	Y	Ge		0	0	1	126	orthorhombic	38	Cm2m (38)	6.08862	20.521216	124.945894	9	0	8.777778	71.801784	70.145754	70.973769	44.868813	41.512572	43.190693	0.427852	107.72106	-0.883452	0.331295	-0.331295	-0.545455	0.545455	0.636364	70.390923	131.059847	106.907051	15.230888	0.142469	127.69441	95.295925	1.339978	110.13281	41.14025	44.08677	-2.27433	-4.7463	6.40145	41.14025	119.91581	45.96848	-2.91494
Cu1Hf2Sb3	icsd_093243	Hf	Sb		0	0	1	123	tetragonal	115	P-4m2 (115)	9.577242	22.707674	217.47689	6	0	7.333333	90.099914	89.710525	89.90522	46.966255	44.999255	45.982755	0.2229	117.85554	0	-0.813733	0.581238	-0.707107	0.707107	0	99.644541	146.000626	116.319021	10.61378	0.091247	137.140833	128.707057	1.065527	146.68428	61.91334	58.76388	0.36964	0.13477	0.05384	61.91334	140.35727	56.50901	0.36708
Cu1K1Se1	icsd_012157	K			0	0	1	111	hexagonal	194	P6_3/mmc (194)	4.007657	25.08207	100.520328	6	0.5794	10	36.051288	30.617013	33.334151	22.552463	19.801868	21.177166	0.872021	52.428829	-0.376288	0.376288	-0.846649	-0.274721	0.961524	0	37.449549	75.935854	50.43231	12.736215	0.252541	40.813331	75.854824	0.538045	87.27795	29.50473	11.87047	0.00576	-0.07487	0.00012	29.50473	87.38136	11.90914	0.00357
Cu1K1Te1	icsd_012158	K			0	0	1	111	hexagonal	194	P6_3/mmc (194)	4.278586	29.786285	127.443196	6	0.8975	10	30.143611	24.300083	27.221847	18.674261	15.997798	17.336029	1.076983	42.901023	-0.483368	-0.096674	-0.870063	-0.8	-0.6	0	29.20767	64.694461	41.189723	11.623651	0.282198	30.985853	64.483999	0.48052	74.60504	25.68793	9.52057	-0.05141	-0.04975	0.16829	25.68793	74.5327	9.47569	-0.05137
Cu1La1S2	icsd_415078	La	S		1	0	0	112	monoclinic	14	P2_1/c (14)	5.166781	21.418989	110.667217	16	1.76	5.5625	67.503714	66.153619	66.828667	36.711683	35.059761	35.885722	0.255995	91.31276	-0.976187	0	0.21693	-0.498273	0.830455	0.249136	65.149543	115.358593	91.81716	10.697367	0.116507	67.011926	93.379462	0.71763	93.62845	49.22136	43.45269	0.0226	2.16489	-0.08296	49.22136	133.07689	43.03837	0.02234
Cu1La1Sb2	icsd_658225	La	Cu	Sb	0	0	1	112	tetragonal	129	P4/nmm (129)	7.123908	25.988297	185.13823	8	0	9.875	61.534889	60.368949	60.951919	35.363883	32.311808	33.837846	0.491598	85.661665	0	0	-1	-0.707107	0.707107	0	61.154883	115.535699	85.62832	12.923067	0.15092	61.154883	99.606305	0.613966	108.59772	44.33937	41.1418	-0.01445	0.08757	-0.00983	44.33937	108.63759	41.15971	-0.01703
Cu1La1Se2	icsd_628251	La	Se		1	0	0	112	monoclinic	14	P2_1/c (14)	6.160802	24.282992	149.6027	16	1.2952	5.6875	56.524343	54.915822	55.720083	29.712776	28.199621	28.956199	0.297584	74.042622	-0.970143	0.242536	0	-0.428571	0.285714	0.857143	50.055528	93.434813	74.396791	9.273834	0.124654	52.013634	78.081616	0.666144	73.78056	37.21637	39.87963	0.02983	0.00973	3.0367	37.21637	93.52419	38.01421	0.03854
Cu1La1Si1	icsd_084207	La			0	0	1	111	hexagonal	194	P6_3/mmc (194)	5.726491	22.283315	127.605193	6	0	9.833333	76.281733	75.314414	75.798074	44.460162	44.094205	44.277183	0.054341	111.182577	-0.110432	0	-0.993884	-0.40161	0.722897	0.562254	98.037268	117.579196	111.598897	3.714007	0.03328	98.552425	110.388156	0.892781	138.96425	56.37107	43.92944	0.14916	-0.66874	2.04082	56.37107	139.48066	44.4362	0.02882
Cu1La1Sn1	icsd_152856	La			0	0	1	111	hexagonal	186	P6_3mc (186)	6.78763	26.18985	177.767025	6	0	10	62.31555	59.535199	60.925374	41.769238	40.693265	41.231251	0.178906	100.926431	0	0	-1	-0.110432	-0.993884	0	70.022531	111.342289	101.714507	10.487085	0.103103	70.022531	111.158241	0.629936	130.19637	38.3834	34.58824	-0.03346	0.02328	0.03185	38.3834	130.73525	34.83522	-0.03248
Cu1La1Sn1	icsd_416545	La			0	0	1	111	hexagonal	194	P6_3/mmc (194)	6.787879	26.188893	177.767025	6	0	10	62.342962	59.556948	60.949955	41.777565	40.700856	41.239211	0.17905	100.949822	0	0	-1	-0.099504	0.995037	0	70.02595	111.33274	101.739208	10.49267	0.103133	70.02595	111.183269	0.629825	130.29354	38.42346	34.63731	-0.01517	0.04161	-0.02238	38.42346	130.72598	34.82033	-0.01728
Cu1La2O4	icsd_071795	La	O		0	1	0	124	orthorhombic	64	Ccme (64)	6.869988	13.996841	96.158133	14	0	5.714286	118.733976	103.650181	111.192078	61.155847	52.18881	56.672329	1.004622	145.326931	0	0	-1	-0.819232	0	0.573462	66.280755	191.418289	146.090099	27.089227	0.185428	183.348792	136.917711	1.339117	207.41256	88.41061	89.43026	-0.02192	-0.02237	0.03153	88.41061	240.88435	76.3054	-0.01101
Cu1La2O4	icsd_072237	La	O		0	0	1	124	orthorhombic	64	Ccme (64)	6.869991	13.996835	96.158133	14	0	5.071429	118.121878	102.518417	110.320147	61.161715	52.107422	56.634569	1.021012	145.077733	0	-1	0	-0.819232	-0.573462	0	65.728072	191.071259	145.824825	27.251392	0.186878	183.659591	136.455465	1.345931	207.13581	88.48601	88.2965	-0.01187	-0.08749	0.0379	88.48601	110.54275	75.47789	-0.06784
Cu1La2O4	icsd_073913	La	O		0	0	1	124	tetragonal	139	I4/mmm (139)	6.94319	13.849272	96.158133	7	0	6.857143	142.879133	142.755317	142.817225	65.963716	61.71074	63.837228	0.345457	166.677537	-0.646762	-0.646762	-0.404226	0	-1	0	136.928233	221.110759	157.956988	17.691983	0.112005	200.173657	170.408828	1.174667	260.79119	69.22604	93.23762	-0.06399	-0.05149	-0.23401	69.22604	260.85722	93.23965	0.04252
Cu1La2O4	icsd_081152	La	Cu	O	0	0	1	124	tetragonal	139	I4/mmm (139)	6.943227	13.849199	96.158133	7	0	4.571429	142.887284	142.764285	142.825785	65.966687	61.709801	63.838244	0.345773	166.68114	0	-0.913812	-0.406138	-0.707107	-0.707107	0	136.975165	221.144433	164.982634	19.701368	0.119415	200.212816	181.650396	1.102188	213.23082	117.4044	92.94213	0.14558	0.00522	0.01779	117.4044	212.17106	93.50868	-0.20235
Cu1La2O4	icsd_173892	La	O		0	0	1	124	tetragonal	139	I4/mmm (139)	6.943124	13.849405	96.158133	7	0	4.571429	142.889569	142.76731	142.82844	65.959827	61.715343	63.837585	0.344732	166.680046	-0.913812	0	-0.406138	-0.707107	-0.707107	0	136.86872	221.028115	164.999109	19.671455	0.119222	200.183242	181.5735	1.102492	212.14166	117.43635	93.51126	0.03814	-0.29068	0.01426	117.43635	213.24157	92.94283	0.04056
Cu1La2O4	icsd_261659	La	O		0	0	1	124	tetragonal	139	I4/mmm (139)	6.444821	14.920218	96.158133	7	0	5.714286	121.252308	119.323359	120.287834	54.169181	47.012743	50.590962	0.777283	133.111437	-0.894427	0	0.447214	-0.707107	-0.707107	0	99.884764	201.259623	129.004346	23.340001	0.180924	177.453948	151.293392	1.172913	193.82222	131.05029	60.29227	-0.04676	-0.02668	0.1618	131.05029	194.05056	60.41981	0.00095
Cu1Li2P1	icsd_240250	Li			0	0	1	112	hexagonal	194	P6_3/mmc (194)	3.296793	13.650034	45.001332	8	0	10.5	62.173524	56.5148	59.344162	41.507273	38.838015	40.172644	0.443768	98.329984	-0.457496	-0.457496	0.762493	-0.242536	-0.970143	0	80.915565	120.582005	94.400573	13.07939	0.138552	96.995666	120.128611	0.807432	145.66232	60.03945	12.46092	0.04704	-0.00422	-0.20649	60.03945	145.69372	12.35565	0.04857
Cu1Nb2O6	icsd_074424	Cu	O		1	0	0	126	orthorhombic	60	Pbcn (60)	5.376008	11.852571	63.719515	36	0	3.111111	120.274018	117.873816	119.073917	58.352919	56.57222	57.462569	0.177745	148.500042	0	-0.650791	-0.759257	-0.447214	0.894427	0	128.392941	185.174088	146.506007	14.035323	0.0958	132.947425	144.770511	0.918332	186.06651	99.13779	71.7646	0.4731	0.00891	-0.03669	99.13779	237.99573	65.21376	0.44392
Cu1O2Sr1	icsd_077293	Sr	O		0	1	0	112	orthorhombic	63	Ccmm (63)	5.188556	14.654957	76.038063	8	0	5.5	96.553649	81.208407	88.881028	47.620795	37.520247	42.570521	1.534974	110.129065	-0.768221	-0.640184	0	0	-0.707107	0.707107	67.383849	184.917932	102.547876	33.172897	0.323487	161.085419	96.665068	1.666428	109.83247	55.6964	28.03511	-0.01921	0.0715	-0.07324	55.6964	219.66646	89.36278	-0.04179
Cu1P1Sr1	icsd_053323	Sr			0	0	1	111	hexagonal	194	P6_3/mmc (194)	4.778953	21.095983	100.816713	6	0.1416	9.833333	64.136551	62.184439	63.160495	47.026955	45.55512	46.291037	0.192937	111.607083	0	0	-1	0	-1	0	89.916188	132.075038	110.744679	13.068494	0.118006	89.916188	131.995996	0.681204	145.30144	32.71309	30.27195	-0.00529	-0.02411	-0.01267	32.71309	145.28258	30.23713	-0.00671
Cu1S2Y1	icsd_092458	Y	S		1	0	0	112	orthorhombic	62	Pnma (62)	4.126339	21.789448	89.91064	16	2.1711	4.875	66.318107	66.011187	66.164647	28.256536	26.389547	27.323042	0.358386	72.051156	-0.789352	0.613941	0	-0.640184	0	0.768221	58.906485	95.323841	69.88305	9.424474	0.134861	68.079981	69.577936	0.978471	100.16128	40.5429	55.95804	-0.04137	-0.04074	0.03793	40.5429	110.62688	39.56208	-0.04596
Cu1Sb1Sr1	icsd_053339	Sr			0	0	1	111	hexagonal	194	P6_3/mmc (194)	5.661076	26.685397	151.068069	6	0	10	46.887843	43.105565	44.996704	24.37652	22.404699	23.390609	0.527791	59.808434	-0.8	0.6	0	-0.082761	0.744845	-0.662085	49.935156	61.920489	57.54083	3.17752	0.055222	56.297218	53.223989	1.057741	87.20403	50.73053	20.61263	-0.00642	0.0248	0.75054	50.73053	88.41148	20.62643	-0.00762
Cu1Sb2Y1	icsd_153572	Y	Cu	Sb	0	0	1	112	tetragonal	129	P4/nmm (129)	6.876882	23.903516	164.381653	8	0	10	68.311609	64.72651	66.519059	40.820849	36.895139	38.857994	0.587398	97.574222	0	0	-1	-0.707107	0.707107	0	67.678421	138.116334	96.752815	18.376905	0.189937	67.678421	124.545627	0.543403	134.87412	47.59187	40.94109	0.00364	-0.07794	-0.00502	47.59187	134.90508	40.95245	-0.00157
Cu1Sb3Ti2	icsd_093241	Ti	Sb		0	0	1	123	tetragonal	115	P-4m2 (115)	7.070354	20.532971	145.175371	6	0	7.333333	88.804416	88.754798	88.779607	42.713549	40.078062	41.395806	0.329353	107.48199	-0.828517	0.092057	-0.552345	-0.668965	-0.743294	0	88.938789	142.682181	105.16314	12.92858	0.122938	133.780717	122.116588	1.095516	136.46722	72.23919	55.25895	0.02604	-0.1618	1.96594	72.23919	149.63111	49.19916	0.02547
Cu1Sb3Zr2	icsd_093242	Zr	Sb		0	0	1	123	tetragonal	115	P-4m2 (115)	7.326689	23.090107	169.174031	6	0	7.333333	86.86858	86.604346	86.736463	38.73603	28.817232	33.776631	1.724035	89.687902	-0.704934	-0.078326	-0.704934	-0.707107	0.707107	0	55.311234	147.123745	79.970222	23.871885	0.29851	126.438468	128.996681	0.980168	141.54208	57.30706	54.7913	-0.30918	-0.00543	-0.27599	57.30706	139.24714	58.81061	-0.32134
Cu1Sc1Sn1	icsd_416543	Sn			0	0	1	111	hexagonal	186	P6_3mc (186)	6.297058	19.971981	125.764731	6	0	8.666667	79.902316	78.068955	78.985635	50.923567	49.992116	50.457842	0.116644	124.798753	0	0	-1	-0.760286	0.228086	-0.608229	108.682519	129.157774	124.861	4.046153	0.032405	108.682519	120.823607	0.899514	152.28799	63.07288	41.28341	0.02662	0.04657	-0.09909	63.07288	151.92829	40.90624	-0.01604
Cu1Si1Y1	icsd_030772	Y			0	0	1	111	hexagonal	194	P6_3/mmc (194)	5.145337	19.42142	99.929757	6	0	9.833333	91.04123	88.46139	89.75131	59.478126	56.474298	57.976212	0.29511	143.113249	0	0	-1	-0.514496	0.857493	0	103.83524	172.97406	142.421026	18.809282	0.132068	103.83524	169.454434	0.612762	188.62451	46.02759	54.57186	0.04815	0.08242	-0.17168	46.02759	196.36226	52.61064	0.04999
Cu1Sn1Y1	icsd_416544	Y	Sn		0	0	1	111	hexagonal	186	P6_3mc (186)	6.602483	22.732596	150.091589	6	0	8.666667	71.985542	68.975296	70.480419	46.505011	43.662974	45.083993	0.369094	111.481612	0	0	-1	-0.622543	-0.553372	0.553372	68.961435	124.650687	112.985143	11.964689	0.105896	68.961435	107.516071	0.641406	136.73726	50.46897	45.69505	0.03777	-0.10593	-0.01448	50.46897	136.59067	45.51261	0.0295
Cu1Sn2Sr1	icsd_103110	Sn			0	1	0	112	orthorhombic	63	Cmcm (63)	6.141941	26.264583	161.315531	8	0	11	47.915638	46.968154	47.441896	30.147115	29.392138	29.769626	0.148605	73.859929	-0.707107	0.707107	0	0	-0.514496	-0.857493	60.430329	85.903226	72.974872	6.757207	0.092596	75.434208	76.476391	0.986372	80.57566	22.27601	22.07176	0.03996	0.01641	-0.5845	22.27601	90.62687	35.32143	0.03617
Cu2F7K3	icsd_015373	F			0	0	1	237	tetragonal	139	I4/mmm (139)	3.553102	14.697183	52.220585	12	0	8.833333	52.73198	52.63432	52.68315	21.149606	15.655824	18.402715	1.756404	49.450325	0	-1	0	0	0	-1	22.762363	76.360661	49.69831	12.87966	0.259157	76.360661	42.970473	1.77705	66.83307	54.53488	33.01599	-0.07072	0.0453	1.00E-05	54.53488	68.02495	34.69921	-0.11134
Cu2Ge2La1	icsd_081756	La	Cu		0	0	1	122	tetragonal	139	I4/mmm (139)	7.251634	18.83554	136.588438	5	0	11.6	85.078753	85.028322	85.053538	47.592578	39.066077	43.329328	1.091885	111.118697	-0.707107	0.707107	0	0	-0.759257	-0.650791	56.291276	148.196834	105.725246	22.832524	0.215961	102.21322	83.046059	1.230802	150.0478	50.20812	57.15475	-2.7742	0.99498	3.28389	50.20812	150.17816	57.04212	1.51063
Cu2Ge2Sr1	icsd_627840	Sr	Cu		0	0	1	122	tetragonal	139	I4/mmm (139)	6.276231	19.049033	119.556135	5	0	12.4	67.51323	67.284932	67.399081	41.05832	37.281468	39.169894	0.509925	98.439805	-0.717137	0.358569	-0.597614	-0.894427	0	0.447214	71.146478	128.076754	95.529678	14.076557	0.147353	98.725938	93.538056	1.055463	127.1072	26.01193	44.0909	10.62289	-10.31898	-0.28565	26.01193	127.67993	44.22247	-9.9728
Cu2Ge2Y1	icsd_052764	Y	Cu		0	0	1	122	tetragonal	139	I4/mmm (139)	6.871203	17.461743	119.983176	5	0	11.6	91.791789	91.663217	91.727503	40.079133	29.336208	34.707671	1.832404	92.461244	-0.156174	0.312348	0.937043	-0.514496	-0.514496	0.685994	49.553541	141.572184	86.567369	22.525073	0.260203	50.98503	91.82939	0.555215	151.38351	41.11168	80.39871	8.80517	-2.73914	-2.05294	41.11168	152.38502	79.78521	-2.2438
Cu2Hf1P2	icsd_053287	Hf	Cu		0	0	1	122	trigonal	164	P-3m1 (164)	7.753245	15.743008	122.059406	5	0	5.6	119.264759	119.203919	119.234339	58.052405	54.600997	56.326701	0.316568	145.991194	0	-0.780869	0.624695	-0.830455	0.498273	-0.249136	113.163371	177.563592	142.073545	16.433248	0.115667	152.787291	161.684556	0.944971	205.03497	70.3143	81.5853	-12.56311	0.56069	-0.19623	70.3143	202.67619	80.56533	10.82781
Cu2I3Rb1	icsd_065250	Rb			0	1	0	123	orthorhombic	63	Ccmm (63)	4.479731	36.652248	164.192196	12	2.6379	5.833333	10.598234	9.241137	9.919686	5.073279	4.143489	4.608384	1.268843	11.971315	-0.406138	0.913812	0	-0.743294	0	0.668965	7.019603	18.044465	11.897539	2.870836	0.241297	7.136825	14.108727	0.505845	17.67557	6.02783	10.85346	-0.0786	-0.00989	0.01435	6.02783	10.57636	7.66744	-0.08498
Cu2K1Se2	icsd_098403	K	Cu		0	0	1	122	tetragonal	139	I4/mmm (139)	4.881328	22.051284	107.639545	5	0	8	31.180159	30.869034	31.024596	11.278597	10.617312	10.947955	0.321497	29.387153	-0.099504	0	-0.995037	-0.913812	0	-0.406138	21.172213	35.708962	28.995147	3.192094	0.110091	21.333228	27.74259	0.76897	50.00703	20.67503	25.32366	0.16196	1.20902	0.91028	20.67503	50.8279	24.44136	0.1676
Cu2La1Si2	icsd_628270	La	Cu		0	0	1	122	tetragonal	139	I4/mmm (139)	6.080006	17.597786	106.994648	5	0	11.6	95.776094	95.436082	95.606088	66.297953	61.056604	63.677278	0.432783	156.32558	0	0	-1	-0.529813	-0.529813	-0.662266	115.864681	192.552121	159.605115	17.665634	0.110683	115.864681	138.394641	0.837205	159.90993	70.88282	62.12793	1.30566	-1.05763	-2.25324	70.88282	160.7181	62.64336	-1.02223
Cu2La1Sn2	icsd_103041	Cu	Sn		0	0	1	122	tetragonal	129	P4/nmm (129)	7.492164	22.315162	167.188846	10	0	11.6	70.08189	70.059813	70.070851	39.280048	38.692413	38.98623	0.076252	98.660936	0	0	-1	0	-1	0	82.75335	105.387881	98.530184	4.637663	0.047068	82.75335	102.044516	0.810953	127.33314	35.47639	48.38589	0.0215	0.46671	0.20624	35.47639	128.18325	48.10935	0.02246
Cu2Li1O2	icsd_069051	Cu			0	0	1	122	tetragonal	137	P4_2/nmc (137)	5.315413	10.37369	55.140449	40	0	4.4	83.456494	83.004006	83.23025	39.331395	34.548722	36.940058	0.697615	96.538026	-0.609208	0.609208	-0.507673	0	-1	0	73.958243	148.117749	88.566654	14.360094	0.162139	119.672059	102.840754	1.163664	168.57517	43.29783	46.70755	-0.0185	-0.08412	0.02914	43.29783	168.72765	46.75737	-0.00214
Cu2Li1P2	icsd_181810	Li	Cu		0	0	1	122	tetragonal	139	I4/mmm (139)	4.52799	14.374294	65.086652	5	0	11.6	88.569131	84.275649	86.42239	40.565343	34.321141	37.443242	0.960619	98.154324	-0.707107	-0.707107	0	0	0	-1	54.549601	155.426936	92.82902	22.787795	0.245481	155.426936	75.742921	2.052033	135.81318	43.6855	53.86862	-2.91999	2.24254	-0.32459	43.6855	133.97998	67.01975	2.2908
Cu2Mg1O3	icsd_004202	Cu			0	1	0	123	orthorhombic	59	Pmmn (59)	5.418644	10.184081	55.18391	12	0	4.666667	100.549659	84.5165	92.53308	54.161903	48.676068	51.418986	0.753209	130.149671	0	-0.6	-0.8	-1	0	0	85.313141	205.642979	128.342139	30.468788	0.237403	124.491627	144.393042	0.862172	266.34123	77.22048	67.95844	-0.09739	0.88731	-0.27995	77.22048	151.21734	40.40241	-0.12106
Cu2Mn3O8	icsd_000971	Cu			1	0	0	238	monoclinic	12	C2/m (12)	5.291872	10.135463	53.635573	13	0	4.230769	138.62944	121.455422	130.042431	53.960978	43.522789	48.741883	1.340565	129.985472	-0.904534	0.301511	0.301511	0	-0.995037	-0.099504	76.069707	234.987983	120.99793	30.553808	0.252515	95.715464	161.850098	0.591383	155.20279	69.67286	102.21165	1.00364	21.71859	-2.81545	69.67286	291.31611	109.78332	6.88484
Cu2Na1O2	icsd_067558	Na			0	0	1	122	orthorhombic	62	Pnma (62)	4.859244	12.444398	60.470369	20	0	4.15	65.851261	60.907655	63.379458	31.724301	26.594802	29.159551	1.045546	75.846814	-0.444444	-0.444444	0.777778	0	-1	0	54.627611	149.620352	70.840036	18.323986	0.258667	66.857566	106.182343	0.629649	114.92555	42.47181	40.41251	0.00782	0.03874	0.06999	42.47181	168.76604	30.29557	0.01089
Cu2O2Sr1	icsd_025002	Sr			0	0	1	122	tetragonal	141	I4_1/amd (141)	5.483236	14.942739	81.93457	10	2.1279	3.9	80.048984	66.439933	73.244459	29.381287	27.291253	28.33627	0.587745	75.298502	-0.707107	-0.707107	0	0	0	-1	56.48307	121.926917	72.387311	12.503579	0.172732	121.926917	62.752672	1.942976	97.4337	35.42113	66.51776	-0.02695	0.03443	-0.00359	35.42113	97.48446	66.54674	-0.04007
Cu2O3Sr1	icsd_099041	Sr			0	0	1	123	orthorhombic	65	Cmmm (65)	5.337474	13.62194	72.706746	6	0	5.333333	107.227876	79.17432	93.201098	50.189607	34.663294	42.426451	2.593916	110.51068	0	-0.668965	0.743294	-0.668965	-0.743294	0	56.429302	224.213245	99.264299	41.233547	0.415392	97.867069	189.157886	0.517383	221.73981	137.1012	25.59012	0.04829	0.00731	-0.26968	137.1012	245.97937	34.48394	0.07151
Cu2O3Sr1	icsd_099042	Cu			0	1	0	123	orthorhombic	59	Pmmn (59)	5.338561	13.619164	72.706746	12	0	3.333333	106.963366	78.053395	92.50838	51.103803	35.14606	43.124932	2.640591	111.974896	0	-0.664364	0.747409	-0.668965	-0.743294	0	57.271729	222.37807	100.499977	42.378081	0.421673	168.583847	93.585976	1.801379	227.55283	131.59254	21.7856	0.13918	-0.02812	0.00291	131.59254	251.01398	37.73381	0.1251
Cu2P1Ti1	icsd_035419	Ti	Cu		0	0	1	112	tetragonal	141	I4_1/amd (141)	6.521453	13.109017	85.489834	16	0	8.5	140.336796	140.003672	140.170234	69.347517	56.804209	63.075863	1.106462	164.545982	-0.995037	0	-0.099504	-0.707107	-0.707107	0	95.349398	257.952142	163.522593	33.86712	0.20711	188.412548	170.819346	1.102993	196.29706	141.1333	87.43206	-0.74779	-1.7826	2.10507	141.1333	206.69348	85.33595	0.03848
Cu2P2Zr1	icsd_035585	Zr	Cu		0	0	1	122	trigonal	164	P-3m1 (164)	5.851678	15.906153	93.07769	5	0	5.6	119.44235	119.376623	119.409486	62.889948	54.760056	58.825002	0.74287	151.583371	0	-0.759257	0.650791	-0.845154	-0.507093	0.169031	103.40945	199.290614	142.419192	26.433486	0.185603	184.489186	185.256563	0.995858	225.1295	69.67343	67.43924	-13.49578	-0.01119	0.04291	69.67343	224.78306	67.68405	13.46019
Cu2S2Tl1	icsd_040495	Tl	Cu		0	0	1	122	tetragonal	139	I4/mmm (139)	6.682864	19.659771	131.383589	5	0	8	41.614707	40.97886	41.296783	17.303086	13.870501	15.586794	1.252885	41.534833	-0.256307	0.683486	0.683486	-0.993884	0	0.110432	24.873432	65.408862	37.761424	9.864057	0.26122	50.927343	56.989315	0.89363	79.21659	26.08316	25.64026	1.70167	-3.87453	0.03231	26.08316	78.36526	25.1365	-4.07907
Cu2S2Y1	icsd_628962	Y	Cu		0	0	1	122	trigonal	164	P-3m1 (164)	5.281616	17.614427	93.032632	5	0	5.6	76.814326	76.506912	76.660619	20.221715	17.487552	18.854634	0.785764	52.277988	-0.696733	0.348367	-0.62706	-0.784465	0.588348	0.196116	34.17382	74.270391	49.243033	9.764547	0.198293	70.020961	61.880663	1.131548	106.24857	61.76605	60.73837	4.16947	-0.40395	0.01883	61.76605	99.74225	62.14904	-3.19251
Cu2Sc1Si2	icsd_060379	Sc	Cu		0	0	1	122	tetragonal	139	I4/mmm (139)	5.050665	15.006591	75.793271	5	0	11.6	113.75483	113.175369	113.465099	66.523662	63.684312	65.103987	0.228044	163.954107	0	-1	0	-0.394055	-0.472866	0.78811	125.471752	191.648388	166.656537	15.962542	0.095781	167.69968	142.401415	1.177655	174.15829	81.83373	73.8886	-1.03405	2.39061	-1.13074	81.83373	173.64711	76.26451	2.35507
Cu2Se2Tl1	icsd_629124	Tl	Cu		0	0	1	122	tetragonal	139	I4/mmm (139)	7.437309	21.853599	162.531975	5	0	8.8	37.010911	35.570238	36.290574	12.221065	6.482392	9.351728	4.466857	25.835959	0	-1	0	-0.744845	0.662085	0.082761	7.380629	42.054382	25.42204	10.355105	0.407328	23.854505	22.014715	1.083571	51.47949	39.39416	21.18846	-0.26248	2.89538	-0.1372	39.39416	47.28917	30.75107	0.14325
Cu2Si2Sr1	icsd_025313	Sr	Cu		0	0	1	122	tetragonal	139	I4/mmm (139)	5.087055	17.684562	89.962345	5	0	11.4	78.090052	77.787998	77.939025	54.274239	52.923951	53.599095	0.131452	130.810841	-0.707107	-0.707107	0	-0.813733	0	0.581238	109.95219	149.398214	130.892741	9.132119	0.069768	114.155384	119.230601	0.957434	149.46199	27.52494	51.31352	2.02739	-3.29476	-0.66163	27.52494	148.90084	51.33294	-3.8426
Cu2Si2Y1	icsd_023551	Y	Cu		0	0	1	122	tetragonal	139	I4/mmm (139)	5.58301	16.190081	90.389386	5	0	11.6	106.001309	105.923311	105.96231	72.352683	70.849555	71.601119	0.106815	175.315212	-0.099015	-0.099015	0.990148	-0.497468	-0.497468	-0.710669	144.640443	195.0353	176.919061	10.489069	0.059287	145.003253	164.381669	0.882113	197.05506	55.15597	66.82639	3.02043	-2.70792	-2.3533	55.15597	197.57814	67.12984	-2.82312
Cu2Sn2Sr1	icsd_182102	Sr	Cu	Sn	1	0	0	122	monoclinic	12	C2/m (12)	6.519884	23.030556	150.156544	5	0	9.2	53.89483	52.939572	53.417201	36.042024	32.595765	34.318895	0.54668	84.796893	-0.5547	0	-0.83205	-0.447214	0	0.894427	57.921569	118.401559	82.518947	13.109434	0.158866	85.201579	94.668833	0.899996	96.45049	20.04424	32.88165	0.4232	-3.64435	3.03419	20.04424	104.02968	32.71776	0.94483
Cu2Te2Tl1	icsd_629346	Tl	Cu		0	0	1	122	tetragonal	139	I4/mmm (139)	7.663022	25.425926	194.839418	5	0	8.8	31.484991	31.456554	31.470773	15.940789	14.782285	15.361537	0.392759	39.635621	-0.705346	-0.705346	0.070535	0	-0.993884	-0.110432	30.194968	53.274603	37.731126	4.652238	0.1233	41.779154	38.582657	1.082848	61.11797	14.24535	19.94368	-0.8559	1.50497	-0.06427	14.24535	61.36481	20.05931	1.47372
Cu3K1S2	icsd_100001	K	Cu		0	0	1	123	monoclinic	12	C2/m (12)	4.436214	18.333066	81.329398	12	0.8298	11.416667	41.834984	40.214149	41.024567	20.503027	16.353294	18.42816	1.309081	48.084637	-0.4819	-0.619586	0.619586	-0.992278	0	0.124035	27.236657	82.272565	43.766875	10.788985	0.24651	46.348146	54.792263	0.845889	91.71791	20.51128	24.34624	0.14411	-4.01925	-0.20991	20.51128	88.40788	24.05077	0.14338
Cu3K1Te2	icsd_100830	K	Cu	Te	0	0	1	123	monoclinic	12	C2/m (12)	5.481557	24.483785	134.209255	12	0.7484	10	27.534833	26.055482	26.795158	13.438278	8.963249	11.200764	2.553097	29.492816	-0.074125	0.667124	0.741249	0	-1	0	14.200013	68.133965	24.580617	8.056381	0.327753	34.246679	35.746366	0.958046	53.3502	11.24341	14.69301	-0.88627	-5.30053	-0.18794	11.24341	75.37963	13.55627	-0.83184
Cu3K3P2	icsd_012163	K	Cu		0	0	1	233	trigonal	166	R-3m (166)	3.196677	24.017161	76.775099	8	1.5659	12.75	26.019917	25.151243	25.58558	14.617394	7.73355	11.175472	4.485175	29.26548	0	-0.857493	0.514496	0	-0.874157	-0.485643	11.714925	54.474348	24.114599	10.041318	0.4164	36.25992	20.88252	1.736377	41.76878	11.04128	19.46153	-10.96989	0.06413	-0.00152	11.04128	41.82313	19.48423	11.02015
Cu3Rb1S2	icsd_409646	Rb	Cu		0	0	1	123	monoclinic	12	C2/m (12)	4.90457	19.198921	94.162457	12	0.8401	11.416667	39.884606	38.938655	39.41163	20.627657	17.084155	18.855906	1.061366	48.787214	-0.468521	-0.624695	0.624695	-0.980581	0	0.196116	28.861535	77.978384	45.131672	9.948123	0.220424	47.16278	53.095211	0.888268	84.74166	18.55157	24.00001	0.31723	-5.35257	-0.18422	18.55157	84.23816	22.65522	0.33059
Cu3S8V4	icsd_100053	V	Cu	S	0	1	0	348	trigonal	160	R3m (160)	4.448387	16.198899	72.05897	15	0	4.8	78.293371	76.059208	77.17629	42.866999	41.051054	41.959026	0.250555	106.564781	-0.404226	0.646762	0.646762	0	-1	0	93.076943	133.817833	102.92112	7.551655	0.073373	133.817833	113.451354	1.179517	132.12423	51.78849	32.27136	0.40795	-1.28108	-0.69424	51.78849	166.70597	52.32076	-0.17379
Cu3Se2Tl1	icsd_068524	Tl	Cu		0	0	1	123	monoclinic	12	C2/m (12)	7.504373	20.39212	153.030079	12	0.5985	9.416667	35.195194	34.376571	34.785883	14.281675	11.036966	12.659321	1.493741	33.869368	-0.363696	-0.581914	0.727393	0	-1	0	19.47815	57.974265	30.871947	7.548246	0.244502	24.014554	36.092638	0.665359	63.51804	14.30921	28.13967	0.64601	-4.3909	0.03254	14.30921	73.86901	25.76987	0.61085
Cu4K1S3	icsd_602356	K			0	0	1	134	tetragonal	123	P4/mmm (123)	4.576311	17.665489	80.84277	8	0	10.125	45.582578	42.986001	44.284289	21.558141	18.74049	20.149315	0.81216	52.487375	-0.408248	0.408248	0.816497	0	-1	0	41.014794	86.398545	48.675463	8.887923	0.182596	42.372208	60.429357	0.701186	100.89855	20.31031	29.04244	0.16135	0.47475	0.15669	20.31031	100.31563	27.3823	0.14529
Cu4K1Se3	icsd_280072	K			0	0	1	134	tetragonal	123	P4/mmm (123)	5.492516	20.035332	110.044382	8	0	10	38.631373	38.389547	38.51046	16.601758	15.385202	15.99348	0.401665	42.145998	-0.707107	-0.707107	0	0	-1	0	35.500475	58.198514	40.210003	4.713492	0.117222	36.839777	43.990464	0.837449	72.95798	18.50373	28.05115	0.06226	0.20386	-0.01138	18.50373	72.63944	27.58972	0.072
Cu4K1Se3	icsd_628205	K			0	0	1	134	tetragonal	123	P4/mmm (123)	5.493113	20.033155	110.044382	8	0	10.375	39.697993	39.483172	39.590583	16.61501	15.397478	16.006244	0.400808	42.316024	-0.707107	-0.707107	0	0	-1	0	35.55214	58.535169	40.363162	4.715994	0.116839	37.113133	44.102285	0.841524	73.57381	19.41493	28.96871	0.02574	0.11488	-0.04995	19.41493	74.01846	28.91727	0.02674
Cu4Na1S4	icsd_081306	Cu	S		0	0	1	144	trigonal	164	P-3m1 (164)	4.33586	17.252467	74.804277	9	0	6.666667	55.905598	52.187001	54.046299	26.864979	18.742991	22.803985	2.237928	59.976566	-0.613572	-0.383482	-0.690268	-0.890871	-0.445435	0.089087	29.077165	99.70196	51.779922	16.715217	0.322813	88.837122	85.077297	1.044193	121.37438	57.96744	14.62779	-4.63312	-1.28076	4.88528	57.96744	115.22151	15.00187	3.28212
Cu4Na1Sb2	icsd_059206	Na	Cu		0	0	1	124	trigonal	166	R-3m (166)	6.339784	19.483137	123.518885	7	0	9.857143	48.071384	35.229021	41.650203	17.932871	5.698156	11.815513	11.100219	32.384239	-0.085436	0.854358	0.512615	-0.86164	0.492366	0.123091	6.116497	96.763192	22.935027	14.515217	0.632884	38.738887	32.695229	1.184848	94.69314	65.65913	16.53391	7.12469	-0.0027	-11.38818	65.65913	95.71369	17.55978	-6.68861
Cu4Na2S3	icsd_100829	Na			1	0	0	234	monoclinic	12	C2/m (12)	4.351386	16.806106	73.129858	18	0.4669	8.944444	46.875637	44.996649	45.936143	20.59223	18.175656	19.383943	0.706542	50.980922	-0.911685	0.341882	-0.227921	0	-1	0	34.574918	87.405628	48.686076	8.344447	0.171393	37.437469	58.039207	0.645038	58.4641	32.30424	33.31324	-0.13	-4.59918	0.18025	32.30424	106.91623	25.29796	-0.00799
Cu4Rb1S3	icsd_628758	Rb			0	0	1	134	tetragonal	123	P4/mmm (123)	4.928032	18.357748	90.467564	8	0	10.375	45.131098	43.948496	44.539797	22.968069	20.402056	21.685062	0.65577	55.971572	-0.707107	0.707107	0	0	-1	0	42.852438	85.57747	52.25508	8.181272	0.156564	50.130486	58.003252	0.86427	97.76847	19.03531	27.45888	-0.01682	0.1413	0.18904	19.03531	97.97698	27.25566	-0.03601
Cu4Rb1Se3	icsd_628760	Rb			0	0	1	134	tetragonal	123	P4/mmm (123)	5.755987	20.790384	119.669177	8	0	10.5	37.65599	36.859494	37.257742	17.6809	14.735835	16.208368	1.020896	42.466924	-0.707107	0.707107	0	0	-1	0	25.560214	63.69975	39.223748	7.779869	0.198346	34.375802	38.956766	0.882409	77.69713	15.02097	26.16711	0.03032	0.12493	0.79918	15.02097	77.5992	26.05499	0.04273
Cu4S3Tl1	icsd_032607	Tl			0	0	1	134	tetragonal	123	P4/mmm (123)	6.451906	17.847524	115.150539	8	0	10.5	49.384797	48.665306	49.025051	19.966086	17.4058	18.685943	0.750254	49.738533	-0.497468	0.497468	-0.710669	0	-1	0	37.620316	78.592039	45.987579	8.509043	0.185029	49.876408	61.924285	0.805442	95.52891	25.71891	33.28339	0.04892	-0.20545	0.02969	25.71891	96.04628	33.36382	0.02788
Cu4Se3Tl1	icsd_629128	Tl	Se		0	0	1	134	tetragonal	123	P4/mmm (123)	7.213231	20.012134	144.352152	8	0	10.75	43.707992	43.65142	43.679706	13.613771	12.317702	12.965737	0.527396	35.395029	0	0	-1	0	-0.919145	0.393919	21.924724	42.29768	34.651121	4.106	0.118495	21.924724	34.682669	0.632152	68.19182	25.66448	37.99051	0.0066	0.26428	0.03864	25.66448	68.72997	38.19238	-0.00706
Cu5K2Te5	icsd_071204	K	Te		0	1	0	255	orthorhombic	63	Cmcm (63)	5.417041	26.411637	143.072935	24	0	8.166667	25.701827	24.664396	25.183111	13.731696	11.174749	12.453223	1.186135	32.07291	-0.383482	0.690268	-0.613572	0	0	-1	22.688726	57.738237	28.683821	6.328129	0.220617	32.067994	37.890056	0.846343	61.36818	13.55413	8.86873	-0.00453	-0.0665	0.32542	13.55413	36.99058	12.81196	-0.01924
Cu6S4Tl1	icsd_108795	Tl			0	0	1	146	tetragonal	139	I4/mmm (139)	6.342989	16.990709	107.77188	11	0	9	49.862842	47.60966	48.736251	16.014001	11.497627	13.755814	2.011373	37.718736	-0.707107	0.707107	0	-0.341882	-0.911685	0.227921	16.996363	50.135849	35.303474	8.952834	0.253596	18.487585	34.290188	0.539151	79.71127	19.23485	46.97291	0.00856	-0.15886	5.11082	19.23485	80.13767	45.38784	-0.38566
Cu8K3S6	icsd_010054	K			2	0	-1	368	monoclinic	12	C2/m (12)	4.232374	18.879802	79.906386	17	0	10.117647	37.835476	32.695409	35.265442	16.908941	12.978287	14.943614	1.67153	39.282266	-0.529999	0	0.847998	0	-1	0	17.001375	73.111103	37.050102	11.525431	0.311077	29.930854	52.697944	0.56797	58.24653	23.29001	25.94757	0.00613	1.79933	0.04758	23.29001	85.9234	22.40223	-0.19035
Cu8K3Se6	icsd_085729	K	Cu		2	0	-1	368	monoclinic	12	C2/m (12)	5.101338	21.051391	107.390257	17	0	9.411765	32.096662	30.276994	31.186828	15.273573	13.042864	14.158219	0.915246	36.891917	-0.529999	0	0.847998	0	-1	0	21.528911	63.106017	34.985351	7.672216	0.219298	30.201304	44.031315	0.685905	47.52235	19.51366	22.46382	0.07927	1.52364	-0.03274	19.51366	72.94642	16.16326	0.00048
Cu8Rb3S6	icsd_010055	Rb	Cu		2	0	-1	368	monoclinic	12	C2/m (12)	4.717803	19.817343	93.494331	17	0	10.882353	35.981518	34.507647	35.244583	18.090137	14.796887	16.443512	1.15553	42.69127	-0.622799	-0.07785	0.778499	0	-1	0	25.196918	81.879917	39.386375	9.941252	0.252403	33.721961	50.94105	0.66198	59.85113	20.19025	23.27052	0.01496	0.6237	0.25342	20.19025	89.71461	14.81552	-0.2004
Cu8Rb3Se6	icsd_014011	Rb	Cu		2	0	-1	368	monoclinic	12	C2/m (12)	5.475017	22.096405	120.978201	17	0	10.588235	31.336768	30.385668	30.861218	15.907907	13.927445	14.917676	0.742293	38.542768	-0.624695	0	0.780869	0	-1	0	25.343286	63.342356	36.217126	6.919387	0.191053	31.323238	42.396988	0.738808	48.31619	19.32319	19.25179	0.1899	0.67587	0.25267	19.32319	72.07655	13.75401	-0.09964
F1La1O1	icsd_030622	O	F		1	1	1	111	trigonal	166	R-3m (166)	5.801823	16.590942	96.25771	6	4.3079	7.833333	107.012804	106.657592	106.835198	51.126029	49.9116	50.518814	0.124988	130.920464	-0.169031	-0.845154	-0.507093	-0.76835	0.548821	0.329293	115.632568	153.534366	129.851891	9.524042	0.073345	123.963163	130.096681	0.952854	166.4565	73.04268	70.04162	2.98269	-3.97831	-6.54834	73.04268	179.17661	73.81945	-6.29957
F1La1O1	icsd_076427	O	F		0	0	1	111	tetragonal	129	P4/nmm (129)	5.727629	16.805855	96.25771	6	4.3684	9.333333	101.920518	101.656942	101.78873	49.026659	45.154302	47.09048	0.431384	122.396667	0	-0.768221	0.640184	-0.707107	0.707107	0	99.192972	171.398056	119.191354	17.619205	0.147823	148.483475	145.363563	1.021463	167.23268	87.2434	58.28634	-0.02306	-0.01928	-0.01485	87.2434	167.22304	58.29141	-0.00275
F1La1S1	icsd_031938	S	F		0	0	1	111	tetragonal	129	P4/nmm (129)	5.319155	19.768218	105.150227	6	1.8187	11	88.904863	88.648244	88.776554	43.377668	42.673807	43.025738	0.085365	111.124909	0	0	-1	-0.676716	0.676716	0.290021	88.917192	120.411956	112.247721	6.809105	0.060661	88.917192	115.138028	0.772266	147.67685	60.15826	64.00404	-0.00346	-0.01381	-0.0072	60.15826	147.75288	64.02336	-0.00155
F1La1Se1	icsd_021010	Se			0	0	1	111	hexagonal	194	P6_3/mmc (194)	5.955269	22.015331	131.107216	6	1.9036	10	78.644263	74.163123	76.403693	40.929998	40.268758	40.599378	0.142526	103.470718	0	0	-1	-0.099504	0.995037	0	93.869541	109.193703	102.311023	4.544543	0.044419	93.869541	109.108845	0.860329	148.98346	72.96582	39.08331	-0.00769	0.00343	-0.03609	72.96582	148.99485	39.04993	-0.00928
F1O1Sc1	icsd_100563	O	F		1	0	0	111	monoclinic	14	P2_1/c (14)	3.345384	13.228801	44.255415	12	4.8285	4.666667	101.779816	89.4294	95.604608	49.523211	38.230764	43.876988	1.614982	114.165797	-0.573462	0	0.819232	-0.248069	-0.620174	-0.744208	47.349454	174.638691	113.742197	30.275551	0.266177	117.254711	113.859372	1.02982	172.49454	89.12383	40.58884	-0.00908	9.69758	0.05083	89.12383	157.36928	91.09517	-0.01174
F1O1Y1	icsd_030623	O	F		1	1	1	111	trigonal	166	R-3m (166)	4.880692	14.051753	68.582274	6	5.0822	8.333333	129.095889	128.478432	128.78716	65.317149	58.539487	61.928318	0.583703	160.119972	-0.574989	0.638877	-0.511101	-0.778499	0.544949	0.3114	120.611596	221.92412	154.955585	24.34416	0.157104	143.660886	153.620722	0.935166	202.73591	88.08275	79.55634	8.37127	-9.53409	-15.54183	88.08275	222.27848	84.46012	-16.33098
F1O1Y1	icsd_076426	O	F		0	0	1	111	tetragonal	129	P4/nmm (129)	4.782421	14.340494	68.582274	6	4.4216	8	118.359221	117.872391	118.115806	55.315921	38.948964	47.132443	2.105207	124.797737	0	-0.868243	0.496139	-0.707107	-0.707107	0	76.840805	238.16805	113.468456	34.775718	0.306479	202.506723	151.387604	1.33767	179.60785	131.68202	55.07748	-0.07537	-0.03321	0.00336	131.68202	179.76588	55.15965	0.02579
F1S1Y1	icsd_087130	S	F		0	0	1	111	tetragonal	129	P4/nmm (129)	4.518806	17.144969	77.474791	6	1.7858	10	101.72939	101.649749	101.689569	53.938288	52.843308	53.390798	0.10439	136.315496	0	0	-1	-0.707107	-0.707107	0	120.17396	158.001338	136.940213	9.227165	0.067381	120.17396	145.983828	0.8232	171.50159	67.88259	69.17339	-0.0061	-0.01305	0.0033	67.88259	171.49202	69.15794	-0.00449
F2Li1Rb1	icsd_018019	Rb			0	1	0	112	monoclinic	15	C2/c (15)	3.24089	16.704019	54.135892	16	6.1589	8.75	30.36982	30.042444	30.206132	14.352872	13.032738	13.692805	0.517366	35.686101	-0.688247	0.688247	-0.229416	-0.928477	0	0.371391	25.396074	54.935645	34.043347	5.777903	0.169722	40.998754	44.027446	0.931209	59.48102	16.59082	20.85549	0.05451	-4.87665	0.01906	16.59082	49.5555	18.8868	0.05788
F3Mg1Na1	icsd_156158	Mg			0	1	0	113	orthorhombic	36	Cmc2_1 (36)	3.038162	11.400155	34.635511	10	6.687	5.2	67.092212	65.194598	66.143405	36.915203	32.313774	34.614489	0.741099	88.419437	-0.476731	0.667424	0.572078	-1	0	0	69.938029	151.073911	81.901879	13.897824	0.169689	81.358584	99.971309	0.813819	160.60981	29.22851	23.75884	-0.03095	0.04226	0.09833	29.22851	98.14372	45.14028	0.11675
F3Mn1Na1	icsd_065770	Mn			0	1	0	113	orthorhombic	62	Pnma (62)	3.816142	11.74196	44.808983	20	0	4	79.168029	78.554871	78.86145	34.586203	33.023638	33.80492	0.244388	88.735568	0	-0.529999	0.847998	-0.747409	0	-0.664364	69.367605	113.201114	87.714529	9.432924	0.107541	106.563633	96.462115	1.10472	134.19682	50.45379	67.87546	0.52413	0.43386	0.04661	50.45379	132.1416	48.13455	0.44148
F3Na1Ni1	icsd_423598	Na	F		0	1	0	113	orthorhombic	63	Cmcm (63)	3.740376	12.313245	46.056165	10	1.2091	5.5	45.523037	26.502939	36.012988	22.028668	11.804043	16.916356	5.048644	43.878697	-0.447214	0.894427	0	-0.40161	-0.722897	-0.562254	9.979334	85.091618	41.971539	20.857998	0.496956	16.735254	44.950345	0.372305	57.18877	31.46769	25.44854	0.00294	-0.02046	9.44188	31.46769	62.12212	35.08072	0.01722
F3Na1Zn1	icsd_069349	Zn			0	1	0	113	orthorhombic	62	Pnma (62)	3.919465	12.317201	48.276837	20	3.7598	4.7	70.603289	70.019776	70.311532	32.044625	31.677394	31.86101	0.066298	83.040084	0	-0.6	0.8	0	-1	0	72.345776	91.186508	82.439562	4.990871	0.06054	91.186508	86.35686	1.055927	124.82914	47.85697	53.91866	0.06139	-0.00857	0.01295	47.85697	115.59058	42.98416	0.04262
F3Na1Zn1	icsd_072320	Zn			0	0	1	113	orthorhombic	62	Pbnm (62)	3.919312	12.317683	48.276837	20	3.7582	4.75	70.498111	69.927801	70.212956	32.034551	31.667814	31.851183	0.066059	83.002544	-0.8	0	0.6	0	0	-1	72.346904	91.174845	82.399183	4.975694	0.060385	91.174845	86.316352	1.056287	105.47691	53.80437	42.92081	0.0268	0.04082	-0.00629	53.80437	124.59204	47.72701	0.02825
F4Fe1K1	icsd_060615	K			0	1	0	114	orthorhombic	63	Cmcm (63)	3.197339	14.796021	47.307895	12	0	6.583333	57.986604	50.882894	54.434749	31.956357	19.680589	25.818473	3.258359	66.881435	-0.668965	-0.743294	0	-1	0	0	26.289539	153.975482	57.425096	23.428187	0.407978	56.7756	100.333477	0.565869	163.67609	22.82183	22.29059	0.23997	3.57988	-1.40398	22.82183	66.29017	32.22609	-0.07231
F4Fe1K1	icsd_060616	K			1	0	0	114	orthorhombic	62	Pnma (62)	3.254217	14.537414	47.307895	48	0	6.395833	46.814906	42.317895	44.5664	28.960167	17.414088	23.187128	3.421422	59.280509	-0.743294	0	0.668965	0	-1	0	22.190474	117.0785	51.91617	22.308723	0.429707	48.261905	87.596171	0.550959	56.60562	26.38017	20.96375	0.01068	-0.00595	0.04846	26.38017	129.42901	12.22661	0.0708
F4Fe1Na1	icsd_015501	F			1	0	0	114	monoclinic	14	P2_1/c (14)	3.447071	12.430774	42.849755	24	0	3.5	57.156886	55.533148	56.345017	27.863123	15.344293	21.603708	4.10855	57.46655	-0.707107	-0.707107	0	-0.196116	0	0.980581	19.511832	127.357411	48.917402	23.563482	0.481699	63.709687	90.447231	0.704385	83.48916	39.05934	30.31887	-0.0288	7.49043	0.00229	39.05934	102.8599	27.76711	-0.01919
F4Fe1Rb1	icsd_021072	Rb	F		0	0	1	114	tetragonal	123	P4/mmm (123)	3.899021	15.424629	60.140954	6	0	6.333333	59.673374	54.214302	56.943838	30.335507	18.856408	24.595957	3.144513	64.501136	-0.502519	-0.502519	-0.703526	-1	0	0	34.740502	144.599451	52.435142	21.034145	0.401146	78.074615	99.797285	0.782332	154.51425	31.04939	21.26276	0.08388	0.03497	0.14873	31.04939	153.11594	20.95516	-0.1034
F4Ga1K1	icsd_203108	K			1	0	0	114	orthorhombic	62	Pnma (62)	3.32406	15.387424	51.148722	48	5.2283	6.958333	37.867129	37.243084	37.555106	26.000769	19.527633	22.764201	1.674186	56.813374	-0.759257	0	-0.650791	0	-1	0	30.519899	94.21075	51.845648	14.404793	0.27784	45.760463	70.428244	0.649746	57.41312	24.8232	22.11476	-0.03307	-0.00096	0.12479	24.8232	106.5798	-1.72607	-0.04831
F4K1Mn1	icsd_072394	K			0	0	1	114	monoclinic	14	P2_1/c (14)	3.351203	14.041792	47.05689	24	1.3707	8.083333	46.204598	44.667986	45.436292	29.634539	25.285331	27.459935	0.894427	68.566771	-0.388514	0.291386	-0.874157	0	-0.995037	0.099504	52.710831	110.939303	63.401248	11.485568	0.181157	55.372939	80.330999	0.68931	119.05024	3.68214	27.66624	-3.00575	0.28051	0.03999	3.68214	119.61209	24.05559	-3.38901
F4K1V1	icsd_419509	K			0	0	1	114	orthorhombic	62	Pmcn (62)	2.909558	15.793061	45.95082	48	0.7946	5.875	37.091663	35.918693	36.505178	20.871042	15.857256	18.364149	1.613569	47.180902	0	-0.640184	0.768221	0	-1	0	26.673203	79.285768	42.384531	11.485789	0.27099	39.093967	55.85416	0.699929	90.41147	6.71177	24.55824	0.05378	-0.0263	-0.03	6.71177	88.44182	21.19888	0.05376
F4K2Mg1	icsd_033519	K	F		0	0	1	124	tetragonal	139	I4/mmm (139)	2.743138	15.435829	42.342603	7	6.4266	6.857143	47.131764	47.101377	47.116571	27.132087	25.993304	26.562695	0.219698	67.081928	-0.421637	0.527046	0.737865	0	-1	0	58.221029	78.417582	65.253769	6.714523	0.102899	71.07485	78.3002	0.907722	90.55225	25.30744	27.16544	0.00981	0.03104	0.01242	25.30744	90.5521	27.16185	0.00073
F4K2Mn1	icsd_023183	K	Mn	F	0	0	1	124	tetragonal	139	I4/mmm (139)	3.171911	15.640216	49.609369	7	0	6.857143	50.359663	49.86642	50.113042	24.363542	22.698128	23.530835	0.376753	61.03881	-0.539164	-0.539164	-0.646997	0	0	-1	50.507169	80.317767	57.793382	6.623529	0.114607	80.317767	68.775372	1.167827	95.0672	39.50889	23.82631	-0.01501	-0.01678	0.00992	39.50889	95.00458	23.86269	-0.0242
F4K2Ni1	icsd_033520	K	F		0	0	1	124	tetragonal	139	I4/mmm (139)	3.258869	15.496242	50.500214	7	0	8	45.828153	45.807065	45.817609	22.861562	21.719034	22.290298	0.263485	57.539838	-0.529813	-0.529813	-0.662266	0	-1	0	48.914584	72.098952	55.072538	5.466987	0.099269	69.074375	64.456249	1.071647	84.27586	23.72393	28.16071	-0.00437	-0.02541	0.02299	23.72393	84.29102	28.17529	-0.01443
F4K2Zn1	icsd_100298	K	F		0	0	1	124	tetragonal	139	I4/mmm (139)	3.202751	16.263022	52.086408	7	4.3169	8	45.587016	45.406977	45.496996	22.067957	21.447668	21.757813	0.14857	56.298917	-0.539164	-0.539164	0.646997	0	-1	0	50.341856	65.939028	54.627636	3.542005	0.064839	63.427253	60.190126	1.053782	79.39483	22.86205	30.89293	0.00551	0.14061	0.00956	22.86205	79.44176	30.91654	0.00352
F4La1Rb1	icsd_262425	F			0	0	1	114	orthorhombic	62	Pnma (62)	4.714061	17.634154	83.128476	24	5.6068	6.875	53.637794	51.336124	52.486959	24.793659	23.570941	24.1823	0.304205	62.888673	0	-0.485643	-0.874157	0	-1	0	47.449931	88.390792	62.050171	7.641605	0.123152	49.686485	71.038606	0.699429	89.06594	40.52872	38.56453	0.00165	0.00492	-0.0241	40.52872	109.44088	29.09821	-0.00064
F4Mg1Rb2	icsd_069681	Rb	F		0	0	1	124	tetragonal	139	I4/mmm (139)	3.788405	16.983963	64.342133	7	6.2383	10.285714	40.490624	40.11945	40.305037	22.684315	20.709027	21.696671	0.486166	55.187348	-0.668965	0	0.743294	-0.707107	0.707107	0	44.060127	77.064744	53.474039	9.061222	0.169451	55.256699	70.318615	0.785805	75.99558	27.68238	22.87651	0.01259	0.02203	-0.05165	27.68238	76.07404	22.92847	0.01388
F4Mn1Tl1	icsd_168525	Tl			0	0	1	114	monoclinic	15	C2/c (15)	6.176783	15.024096	92.800582	12	0.7383	8.25	41.596606	41.103489	41.350047	22.889803	9.264892	16.077348	7.364975	42.698202	-0.117041	-0.702247	-0.702247	-0.703526	0.703526	0.100504	11.234345	101.382886	32.279238	19.799512	0.613382	72.013596	71.046158	1.013617	76.62815	37.65684	17.68634	-0.03558	-3.75101	-0.14809	37.65684	75.57563	16.8904	-0.03503
F4Na1V1	icsd_407013	F			1	0	0	114	monoclinic	14	P2_1/c (14)	3.000734	13.827511	41.49268	24	0	3.541667	29.746032	26.377648	28.06184	21.717105	10.23763	15.977368	5.734209	40.286269	-0.811107	0.486664	-0.324443	-0.099504	0	0.995037	10.136871	99.392336	33.171667	16.569106	0.499496	24.267125	52.290811	0.46408	42.64143	22.94287	8.57992	8.27884	-3.09013	2.61106	22.94287	69.50957	-4.64313	1.79697
F4Ni1Rb2	icsd_069682	Rb	F		0	0	1	124	tetragonal	139	I4/mmm (139)	4.257715	17.027854	72.499743	7	0	9.142857	38.55509	38.307866	38.431478	19.191118	17.663131	18.427124	0.438989	47.663479	0	-0.707107	-0.707107	-0.707107	-0.707107	0	38.127712	62.654534	45.779263	7.303681	0.159541	54.132688	60.16689	0.899709	70.70928	27.30816	21.78863	-0.02848	0.0236	0.00551	27.30816	70.70579	21.78458	-0.03252
F5Hf1Rb1	icsd_095846	Rb			1	0	0	115	orthorhombic	64	Ccme (64)	5.382807	15.818886	85.150013	28	7.1281	6.892857	54.993948	48.403	51.698474	27.239805	2.110575	14.67519	59.667883	40.219943	-0.242536	0	-0.970143	-0.358569	0.717137	0.597614	3.001621	137.364533	17.343795	26.228685	1.512281	3.857267	18.101162	0.213095	54.62576	28.19583	48.87863	-0.04016	3.73117	-0.09151	28.19583	122.88663	41.88813	-0.04386
F5K1Zr1	icsd_083584	K			1	1	1	115	triclinic	2	P-1 (2)	3.621506	14.758784	53.449023	42	5.9878	7.142857	53.705973	46.940988	50.323481	28.542598	17.882374	23.212486	3.124768	60.357223	-0.312348	-0.937043	-0.156174	-0.51465	0.735215	0.441129	31.147804	147.573749	55.225706	23.398742	0.423693	40.227541	65.997359	0.609533	61.83144	41.21907	26.20844	9.49567	-1.07164	-4.19676	41.21907	89.68204	48.25207	3.37752
F5Tl1Zr1	icsd_026558	Tl			1	0	0	115	monoclinic	14	P2_1/c (14)	5.68082	16.310657	92.657902	28	4.8772	5.785714	48.378919	34.266821	41.32287	26.508683	13.256603	19.882643	5.410124	51.40359	-0.274721	0	-0.961524	-0.371391	-0.742781	0.557086	20.018477	124.633481	47.402664	28.503809	0.601312	24.814172	49.391958	0.502393	50.52929	23.86733	41.4616	-0.00076	-11.73764	0.01714	23.86733	113.74576	35.83367	-0.01498
F7K3Mn2	icsd_033525	Mn	F		0	0	1	237	tetragonal	139	I4/mmm (139)	3.411106	14.61059	49.838278	12	0	8.083333	60.399639	60.018821	60.20923	26.864639	25.608548	26.236593	0.251594	68.72702	-0.778499	0.07785	-0.622799	0	0	-1	59.856245	91.007263	66.658511	5.758989	0.086395	91.007263	73.820737	1.232814	101.26452	54.69029	31.70831	0.10951	0.02334	1.43423	54.69029	101.19333	32.11234	-0.00541
F7K3Ni2	icsd_033523	F			0	0	1	237	tetragonal	139	I4/mmm (139)	3.541143	14.367562	50.877597	12	0	7.833333	57.148662	57.134155	57.141409	26.147929	25.788104	25.968017	0.07002	67.655351	-0.641223	0.284988	-0.71247	-0.707107	0.707107	0	62.793447	73.306998	66.660772	3.554362	0.05332	72.411136	73.25605	0.988466	94.60484	36.7129	39.01338	0.01401	-0.01172	0.0013	36.7129	94.62354	39.02867	0.0197
F7K3Zn2	icsd_009925	F			0	0	1	237	tetragonal	139	I4/mmm (139)	3.435834	15.346536	52.728157	12	4.032	9.583333	54.326552	54.324016	54.325284	25.829785	25.335497	25.582641	0.097595	66.335163	-0.514496	0.514496	0.685994	-1	0	0	60.268803	76.716313	64.851455	3.914725	0.060364	71.177134	71.814233	0.991129	94.75864	31.77423	36.08551	0.0167	0.07215	0.00221	31.77423	94.65159	36.03499	0.02692
Fe1Ge2La1	icsd_632049	Ge			0	1	0	112	orthorhombic	63	Cmcm (63)	7.068068	19.971291	141.158446	8	0	11.5	91.620503	91.175076	91.39779	56.97601	55.545528	56.260769	0.133652	140.046633	0	-0.707107	-0.707107	0	0	-1	116.169833	168.242468	136.976793	9.289529	0.067818	155.599134	146.577898	1.061546	162.63231	50.45669	44.4059	1.28561	0.26665	0.53122	50.45669	179.48804	51.70463	-2.40671
Fe1Ge2Y1	icsd_632162	Ge			0	1	0	112	orthorhombic	63	Cmcm (63)	6.558683	18.35763	120.401869	8	0	11.25	101.57072	99.843713	100.707217	54.644234	51.011461	52.827848	0.373371	134.896118	-0.5547	0.83205	0	-0.393919	-0.919145	0	95.852157	181.936916	131.363949	16.942185	0.128971	141.37949	135.188099	1.045798	204.07994	60.0216	50.95876	0.10074	-0.28293	2.05923	60.0216	194.44091	70.24361	0.67368
Fe1Ge3La1	icsd_059908	La			0	0	1	113	tetragonal	107	I4mm (107)	7.098248	19.307732	137.051064	5	0	12	91.651349	91.541915	91.596632	54.078789	53.366397	53.722593	0.067941	134.811548	-0.476731	-0.190693	-0.858116	-0.707107	0.707107	0	123.242117	149.286777	133.957147	7.912252	0.059066	126.58746	147.102444	0.860539	171.05036	51.78915	55.96562	0.26793	-0.35078	-0.07725	51.78915	171.31468	56.10921	-0.40516
Fe1Hf1Si2	icsd_632270	Hf			1	0	0	112	orthorhombic	71	Immm (71)	8.443715	14.282708	120.59912	24	0	6.625	170.600043	167.054	168.827022	111.261306	109.309192	110.285249	0.11052	271.694752	-0.976187	0	0.21693	-0.272166	0.952579	-0.136083	233.924083	315.418137	269.573594	19.2586	0.071441	236.616369	281.976158	0.839136	277.26305	110.56856	75.83729	0.00417	2.71045	0.01956	110.56856	372.12976	94.05919	0.00844
Fe1In1O3	icsd_071010	In			0	0	1	113	hexagonal	194	P6_3/mmc (194)	6.364965	11.409187	72.619081	10	0	4.4	180.458109	177.039857	178.748983	81.084635	75.657844	78.37124	0.377948	205.133881	-0.913812	0.406138	0	0	0	-1	146.164925	280.613531	201.333009	27.355188	0.13587	280.613531	190.295393	1.474621	278.89416	152.60651	105.6005	-0.00063	-0.00175	32.44973	152.60651	281.20751	107.21969	0.00279
Fe1In1O3	icsd_080469	In			0	0	1	113	hexagonal	194	P6_3/mmc (194)	6.364994	11.409136	72.619081	10	0	4.4	180.485029	177.064986	178.775007	81.089835	75.659721	78.374778	0.378166	205.14577	-0.913812	0.406138	0	0	0	-1	146.137137	280.62228	201.342653	27.363103	0.135903	280.62228	190.311468	1.474542	278.89514	152.62131	105.60778	0.00582	-0.0023	32.46701	152.62131	281.2908	107.26387	0.00601
Fe1La1Sb2	icsd_657914	La	Fe	Sb	0	0	1	112	tetragonal	129	P4/nmm (129)	7.272258	25.01854	181.941278	8	0	10.5	71.494016	69.322956	70.408486	45.320507	41.88626	43.603383	0.441267	108.42742	0	-0.287348	-0.957826	-0.707107	-0.707107	0	86.897208	153.870956	107.606532	17.680945	0.164311	87.08846	133.725279	0.651249	137.59699	52.98018	40.26107	-0.00611	0.01562	0.39204	52.98018	138.85475	38.5745	-0.00696
Fe1La1Si1	icsd_656907	La	Fe	Si	0	0	1	111	tetragonal	129	P4/nmm (129)	5.710244	21.600229	123.34259	6	0	10	62.422163	29.400838	45.9115	45.214458	30.167711	37.691085	3.616992	88.778887	0	0	-1	-0.707107	0.707107	0	25.216274	173.402331	90.12793	41.774249	0.463499	25.216274	156.466701	0.161161	162.76868	56.06458	23.28427	-0.34053	-0.01974	-0.00523	56.06458	165.73545	22.32266	0.56121
Fe1La1Si2	icsd_632434	Si			0	1	0	112	orthorhombic	63	Cmcm (63)	5.627641	18.509746	104.166208	8	0	10.75	104.235747	96.928023	100.581885	77.350644	70.66953	74.010087	0.548094	178.298451	0	-1	0	-0.530669	-0.379049	0.758098	95.249151	213.865282	182.309855	28.668515	0.157252	95.249151	194.119498	0.490673	204.8353	65.10788	62.19868	0.07106	0.2163	-1.05514	65.10788	123.63583	60.44005	0.07099
Fe1Li1O2	icsd_051207	Li	Fe		0	0	1	112	trigonal	166	R-3m (166)	4.694345	8.382097	39.348459	4	0	6	145.803978	138.935377	142.369677	74.924111	71.035509	72.97981	0.323146	186.988791	-0.217643	-0.652929	0.725476	-0.099504	0.995037	0	155.118394	228.69078	179.640222	18.305742	0.101902	208.391658	213.320519	0.976895	280.94904	134.8675	60.69955	-2.12944	-1.88117	9.63858	134.8675	297.32224	58.68398	2.16559
Fe1N2W1	icsd_075971	Fe	W		0	0	1	112	hexagonal	194	P6_3/mmc (194)	11.679189	9.515292	111.130894	8	0	6	302.791856	301.766394	302.279125	184.573835	182.122683	183.348259	0.070692	457.537824	-0.572078	-0.476731	-0.667424	0	0	-1	412.532462	510.38053	451.860429	20.506909	0.045383	510.38053	474.966083	1.074562	570.6549	218.49715	143.61971	1.34852	1.33209	0.91406	218.49715	569.33124	148.21724	-2.35062
Fe1Na1O2	icsd_075588	Na	Fe		0	0	1	112	trigonal	166	R-3m (166)	4.676041	9.839704	46.01086	4	0	5.5	137.940566	133.429563	135.685064	82.584213	78.473877	80.529045	0.2957	201.686787	-0.650945	0.390567	-0.650945	-0.839254	0.466252	0.279751	159.250021	245.931982	196.883188	22.492059	0.114241	201.012872	223.02297	0.90131	279.24436	110.29579	60.51787	15.2642	0.10433	-1.673	110.29579	279.37648	60.67682	-15.16889
Fe1Nb2O6	icsd_015855	Fe	O		1	0	0	126	orthorhombic	60	Pbcn (60)	5.45519	11.420069	62.298648	36	1.3674	3.888889	158.047709	156.729796	157.388752	78.635499	75.475319	77.055409	0.217761	198.73377	-1	0	0	-0.529999	0	0.847998	140.783416	230.76367	201.933176	18.949798	0.093842	140.783416	190.776482	0.73795	219.78696	117.51618	121.04614	-0.00881	-0.01729	-0.03557	117.51618	234.84836	102.43145	0.01992
Fe1Nb4S8	icsd_632800	Fe			0	0	1	148	hexagonal	194	P6_3/mmc (194)	4.883336	17.891185	87.368676	26	0	4.615385	82.341714	76.491099	79.416407	65.451327	63.733906	64.592616	0.211221	152.447304	0	0	-1	-0.813733	-0.581238	0	118.617152	183.001208	151.39649	19.38502	0.128041	118.617152	182.415899	0.650257	200.08768	53.58647	27.55994	0.00146	-0.03045	0.24523	53.58647	199.94675	27.11624	0.00281
Fe1Nb4Se8	icsd_632812	Fe			0	0	1	148	hexagonal	194	P6_3/mmc (194)	6.595333	20.512879	135.28927	26	0.0865	4.615385	69.403851	65.399251	67.401551	53.456101	52.622351	53.039226	0.140453	126.053306	0	0	-1	-0.936329	-0.351123	0	97.140978	143.361871	125.934519	12.604316	0.100086	97.140978	143.028324	0.679173	160.014	45.77006	27.20843	0.0114	-0.01399	0.13389	45.77006	159.93619	27.1963	0.01175
Fe1O2Sr1	icsd_418606	Sr			0	0	1	112	tetragonal	123	P4/mmm (123)	5.548184	13.12882	72.841111	4	0	6	133.221377	119.772239	126.496808	86.010672	77.380509	81.69559	0.669934	201.671516	-0.301511	-0.301511	0.904534	0	-1	0	147.593976	295.156869	195.11616	42.089737	0.215716	150.845241	274.729665	0.549068	325.0411	74.9866	57.84137	2.00E-05	-0.0015	-0.00728	74.9866	325.04446	57.83963	-4.00E-05
Fe1O3Ti1	icsd_153493	Ti	Fe		0	0	1	113	trigonal	148	R-3 (148)	5.000467	10.075886	50.384134	10	1.3386	4.8	198.728032	191.263586	194.995809	95.508355	90.726716	93.117535	0.302546	240.99184	0	0	-1	-0.226455	-0.792594	-0.566139	185.950751	289.492143	241.036782	21.807743	0.090475	185.950751	225.940649	0.823007	337.27918	172.61443	129.34012	-9.6382	-9.87992	-0.11827	172.61443	337.26609	129.27988	9.90482
Fe1O3Ti1	icsd_246514	Ti			0	0	1	113	orthorhombic	62	Pbnm (62)	5.214718	9.661909	50.384134	20	1.3998	4.7	191.244077	189.3484	190.296238	90.807616	81.710913	86.259264	0.566651	224.809824	0	-0.768221	-0.640184	-0.668965	0.743294	0	174.995334	317.651856	217.248483	34.353602	0.15813	304.132006	261.174984	1.164476	287.30196	177.80619	94.10675	-0.12246	-0.00401	-0.03955	177.80619	333.99171	105.56081	-0.11354
Fe1O3Y1	icsd_023822	Fe			0	0	1	113	orthorhombic	33	Pbn2_1 (33)	5.887416	10.872928	64.013455	20	0	4.65	192.885844	192.772501	192.829173	74.781659	67.476347	71.129003	0.541912	190.022447	-0.668965	0.743294	0	0	-0.668965	0.743294	132.555639	254.332193	186.878053	29.35141	0.157062	185.166625	148.390398	1.247834	278.20919	149.91319	143.71962	0.01969	0.14098	0.2538	149.91319	271.96925	154.16332	-0.01389
Fe1O3Y1	icsd_080865	Fe			0	1	0	113	orthorhombic	62	Pnma (62)	5.889382	10.869298	64.013455	20	0	4.75	193.611709	192.599237	193.105473	78.463875	68.447651	73.455763	0.736927	195.569591	-0.707107	0	0.707107	-0.581238	0.813733	0	126.972337	273.086817	190.031553	37.640882	0.198077	233.787418	145.781041	1.603689	273.35196	148.37379	150.20189	0.01845	0.01964	-0.01241	148.37379	329.14958	134.72438	0.01539
Fe1O4Sr2	icsd_069849	Sr	O		0	0	1	124	tetragonal	139	I4/mmm (139)	5.459132	12.822449	69.999443	7	0	6.857143	126.521859	126.022566	126.272212	71.036935	69.488905	70.26292	0.115349	177.808783	0	-1	0	-0.707107	-0.707107	0	156.659765	213.046006	179.490426	12.708208	0.070802	169.697043	185.583396	0.914398	213.10153	100.51068	76.13128	0.29508	0.0204	1.02535	100.51068	213.13119	76.23126	0.02426
Fe1P4Si4	icsd_079005	P			0	1	0	144	triclinic	1	P1 (1)	3.346556	16.103242	53.890396	9	1.2629	4.222222	106.031462	105.845011	105.938236	92.371681	85.963458	89.16757	0.374491	208.894343	-0.123091	0.86164	-0.492366	-0.423999	0.847998	0.317999	154.129618	258.718228	208.928345	24.14062	0.115545	197.417563	207.309139	0.952286	199.8535	51.4256	68.25063	-6.16488	3.40661	6.26305	51.4256	226.97218	36.00858	28.75019
Fe1S2Tl1	icsd_150822	Tl	Fe		0	0	1	112	tetragonal	119	I-4m2 (119)	6.3624	21.163773	134.652384	4	0	7	48.931679	47.503831	48.217755	18.544575	17.92898	18.236778	0.201734	48.585095	-0.8	-0.6	0	-0.099015	-0.990148	-0.099015	39.353627	60.919449	47.466025	3.799126	0.080039	44.599864	48.370312	0.92205	79.93509	39.72889	32.90774	-1.17934	0.35096	-2.69311	39.72889	85.91166	33.30759	0.8434
Fe1S8Ti4	icsd_053534	Fe			0	0	1	148	monoclinic	12	C2/m (12)	3.635167	17.703859	64.35648	13	0	4.615385	66.521799	64.879156	65.700478	51.948019	50.038497	50.993258	0.216124	121.536389	-0.351123	0	-0.936329	-0.486664	-0.811107	-0.324443	93.782292	146.201908	121.110758	13.593601	0.112241	95.296555	136.245722	0.699446	149.90353	32.53291	29.81511	0.16191	-6.73078	-0.00621	32.53291	150.19094	33.70124	-0.02192
Fe1Si1Y1	icsd_633643	Y	Fe	Si	0	0	1	111	tetragonal	129	P4/nmm (129)	5.249766	18.223126	95.667154	6	0	9.833333	97.762834	46.361857	72.062346	62.589419	25.624943	44.107181	8.321288	109.899492	0	0	-1	-0.562254	-0.722897	-0.40161	15.847484	184.341975	109.119997	49.186243	0.450754	15.847484	113.440041	0.139699	212.66329	54.5205	79.01546	0.16609	-0.39363	1.56765	54.5205	220.05112	62.98661	1.1789
Fe1Si2Ti1	icsd_166099	Si			0	0	1	112	orthorhombic	55	Pbam (55)	5.104772	13.002143	66.372981	48	0	9.770833	178.078754	176.568541	177.323648	117.741279	117.304194	117.522736	0.027184	288.772699	-0.640184	-0.768221	0	0	0	-1	276.941382	322.512706	287.481281	10.004637	0.034801	322.512706	279.480157	1.153974	320.27837	85.80091	95.20148	0.00761	-0.00929	0.01874	85.80091	324.40672	110.59375	0.00667
Fe2Ge2La1	icsd_108444	La	Fe		0	0	1	122	tetragonal	139	I4/mmm (139)	7.436896	17.678519	131.473314	5	0	11.6	103.432528	97.643489	100.538008	64.492165	62.734834	63.613499	0.199348	157.600857	0	0	-1	-0.640184	-0.768221	0	119.062581	192.471708	158.109262	19.039106	0.120417	119.062581	183.342588	0.649399	207.46692	77.17201	50.71351	1.21388	-3.59998	-2.14825	77.17201	214.08767	57.09894	-1.45273
Fe2Ge2Y1	icsd_081745	Y	Fe		0	0	1	122	tetragonal	139	I4/mmm (139)	7.022167	16.357922	114.868053	5	0	11.6	121.210143	120.668751	120.939447	67.556132	66.139395	66.847763	0.111589	169.34262	-0.099504	0	0.995037	-0.888889	-0.444444	0.111111	140.624245	194.246162	169.615523	12.492744	0.073653	140.6661	182.549908	0.770562	231.47442	73.08383	75.61058	-2.17699	-1.55129	0.02078	73.08383	207.29684	84.64792	0.04066
Fe2I1La2	icsd_409622	La	Fe	I	0	0	1	122	hexagonal	194	P6_3/mmc (194)	6.405596	26.773816	171.502242	10	0	8.2	49.23027	47.685146	48.457708	25.84857	23.785054	24.816812	0.466187	63.594198	-0.829561	-0.518476	0.20739	-0.496139	0.868243	0	48.532557	95.45848	61.480347	10.487128	0.170577	75.440307	70.942416	1.063402	79.32504	35.83555	27.40391	-0.00812	0.04294	-10.45052	35.83555	101.54639	23.20641	-0.01263
Fe2K4O5	icsd_154372	K			1	0	0	245	monoclinic	14	P2_1/c (14)	3.193256	16.455152	52.545516	22	0.3295	4.727273	55.012461	47.354907	51.183684	25.256491	22.899473	24.077982	0.67635	62.442485	-0.819232	0	-0.573462	0	-0.743294	0.668965	37.360876	88.330135	62.439853	13.106466	0.209905	47.101396	76.600402	0.614898	66.03539	34.19435	35.09429	0.01183	-11.09261	-0.0281	34.19435	98.6362	49.30589	-0.0207
Fe2La1P2	icsd_060122	La	Fe		0	0	1	122	tetragonal	139	I4/mmm (139)	6.46242	16.061778	103.797953	5	0	11.2	129.086758	120.581573	124.834166	87.565421	79.455824	83.510622	0.580856	204.851795	0	0	-1	-0.705346	0.705346	0.070535	116.213754	249.031383	205.738559	35.578334	0.17293	116.213754	245.293993	0.473773	283.63203	61.6691	79.49209	0.10257	0.29518	-0.0624	61.6691	283.66264	79.63669	0.84857
Fe2La1Si2	icsd_632430	La	Fe		0	0	1	122	tetragonal	139	I4/mmm (139)	6.121983	16.641589	101.879524	5	0	11.4	100.749174	93.670381	97.209778	74.796243	70.742642	72.769442	0.362075	174.712749	0	0	-1	-0.743294	-0.668965	0	123.530468	226.352647	174.826976	28.540655	0.163251	123.530468	214.430682	0.576086	231.64471	65.80095	45.94045	1.98748	-2.79835	0.26891	65.80095	224.41378	44.82287	-1.05092
Fe2Na1O3	icsd_200009	Na			0	0	1	123	trigonal	164	P-3m1 (164)	5.315272	9.511707	50.557309	6	0	6	156.555789	153.70478	155.130285	85.964969	80.220296	83.092633	0.376605	211.513485	-0.099504	0.597022	-0.79603	0	-0.961524	-0.274721	160.729696	274.547086	207.231557	28.48202	0.137441	179.589676	236.239998	0.7602	297.43612	96.79964	98.81118	-23.5567	3.62741	-1.21646	96.79964	309.02034	92.26365	18.56807
Fe2O4Y1	icsd_067701	Y			0	0	1	124	trigonal	166	R-3m (166)	5.174654	12.129663	62.766812	7	0	4.571429	161.472752	155.684728	158.57874	68.923287	65.237279	67.080283	0.319686	176.371869	-0.140028	-0.980196	0.140028	-0.099015	-0.099015	-0.990148	138.082734	240.295477	173.808991	23.727863	0.136517	239.16799	170.759272	1.400615	270.38912	120.16425	111.76356	-1.8867	0.61931	27.45713	120.16425	206.22918	103.81521	-0.48399
Fe2O4Y1	icsd_081144	Y			0	0	1	124	triclinic	2	P-1 (2)	5.189643	12.094631	62.766812	21	0	4.095238	163.278402	159.829913	161.554158	71.191039	69.304874	70.247957	0.157653	184.065103	-0.811107	0.486664	-0.324443	-0.099504	0	-0.995037	154.36859	241.019492	181.844356	17.812392	0.097954	240.667456	180.234157	1.335304	252.04268	115.98397	110.56488	0.59391	-0.38568	19.9336	115.98397	237.02678	109.41199	-1.50948
Fe2O5Sr3	icsd_261512	Sr			1	0	0	235	orthorhombic	65	Cmmm (65)	5.305052	14.227813	75.479292	10	0.5442	6.4	106.474537	101.679261	104.076899	58.413294	56.713447	57.563371	0.197024	145.808596	-0.847998	0	-0.529999	0	-0.819232	0.573462	118.836942	178.556495	144.24476	16.912577	0.117249	128.424318	172.541455	0.74431	150.55542	49.58563	61.72225	0.14652	-4.47489	-0.12005	49.58563	212.6366	83.54913	0.08452
Fe2O5Sr3	icsd_420235	Sr	O		0	0	1	235	orthorhombic	71	Immm (71)	5.304025	14.230569	75.479292	10	0.5447	6	106.45551	101.631264	104.043387	58.4144	56.70584	57.56012	0.198119	145.794335	-0.874157	0	0.485643	0	-0.847998	-0.529999	118.645329	178.588085	144.257814	16.847656	0.116789	160.345969	137.859669	1.16311	149.09923	49.57974	61.99598	0.15586	3.9254	0.08787	49.57974	212.83028	83.40495	0.15594
Fe2O6Sr3	icsd_074434	Sr	O		0	0	1	236	tetragonal	139	I4/mmm (139)	5.346162	13.286685	71.032777	11	0	6.545455	121.259036	119.715475	120.487255	65.053881	60.149313	62.601597	0.420593	160.080445	0	-0.768221	-0.640184	-0.743294	-0.668965	0	126.289684	230.772324	157.201544	23.547086	0.149789	174.767715	190.449696	0.917658	214.17305	108.59115	61.61041	0.07066	0.12146	2.9708	108.59115	207.94275	64.5324	-0.05046
Fe2O7Sr3	icsd_074422	O			0	0	1	237	tetragonal	139	I4/mmm (139)	5.564512	12.099417	67.327348	12	0	8	138.584457	137.828059	138.206258	64.885454	44.313076	54.599265	2.326742	144.737916	0	-1	0	-0.650945	0.650945	0.390567	59.956809	217.501016	146.878963	41.758547	0.284306	132.327164	123.920614	1.067838	178.87051	145.17367	99.35454	1.68367	-0.28908	-2.9535	145.17367	181.03162	101.80821	1.05754
Fe2P2Sr1	icsd_010467	Sr	Fe		0	0	1	122	tetragonal	139	I4/mmm (139)	5.336545	16.258767	86.76565	5	0	11.2	101.119831	80.676339	90.898085	71.200935	57.995233	64.598084	1.391917	156.67886	0	0	-1	-0.707107	0.707107	0	69.154403	226.563158	157.123432	44.031936	0.280238	69.154403	217.671866	0.3177	246.09771	52.52325	56.22609	0.67607	-1.18243	-0.31529	52.52325	246.74144	54.91019	-1.34489
Fe2S2Tl1	icsd_633338	Tl	Fe		0	0	1	122	tetragonal	139	I4/mmm (139)	7.159233	17.63715	126.268465	5	0	7.8	73.890313	58.63804	66.264176	44.649894	28.480423	36.565159	3.098808	92.653192	0	-0.6	-0.8	-0.707107	-0.707107	0	50.153811	199.355058	83.299914	38.917134	0.467193	63.4728	169.294664	0.374925	167.95873	66.68056	30.91249	-0.21832	-0.09401	0.19125	66.68056	168.04161	31.08044	-0.16008
Fe2Sc1Si2	icsd_087157	Fe			1	0	0	122	orthorhombic	57	Pbcm (57)	5.371076	13.15903	70.678147	20	0	9.5	165.429396	164.924055	165.176725	97.185631	87.563686	92.374659	0.55249	233.580818	-0.668965	0.743294	0	-1	0	0	158.067569	305.104441	221.398664	33.756307	0.152468	305.104441	276.716795	1.102587	342.24089	98.33497	71.21846	-0.01817	-0.10919	-2.13799	98.33497	319.51324	89.45263	-0.09958
Fe2Se2Tl1	icsd_053544	Tl	Fe		0	0	1	122	tetragonal	139	I4/mmm (139)	7.942852	19.81868	157.416851	5	0	8.8	59.925744	50.401373	55.163559	32.622337	24.190544	28.40644	1.931757	72.734465	-0.085436	0.512615	0.854358	-0.707107	-0.707107	0	44.108148	133.702931	68.288299	24.901182	0.364648	47.794906	118.699786	0.402654	127.55735	48.3789	31.82907	-0.2691	-0.17968	0.34924	48.3789	127.60895	32.15848	-0.21888
Fe2Si2Y1	icsd_633642	Y	Fe		0	0	1	122	tetragonal	139	I4/mmm (139)	5.616656	15.182389	85.274262	5	0	11.6	135.075021	131.058973	133.066997	94.760379	92.200898	93.480638	0.169442	227.231306	0	0	-1	-0.743294	0.668965	0	179.438292	265.815667	226.319248	25.025754	0.110577	179.438292	264.348821	0.678794	295.06751	73.26208	68.47455	-0.69639	-0.20735	-0.34608	73.26208	295.74701	68.28762	0.24213
Fe2Si2Zr1	icsd_633666	Zr	Fe		0	0	1	122	tetragonal	139	I4/mmm (139)	6.21188	13.851546	86.044138	5	0	11.6	180.865734	180.687128	180.776431	95.968781	93.219256	94.594018	0.148465	241.63556	-0.995037	0	-0.099504	-0.707107	0.707107	0	202.653991	282.815636	245.056218	18.727797	0.076422	217.918801	246.650731	0.883512	287.79478	138.79799	122.49539	0.07315	-2.76393	-0.4199	138.79799	290.84178	119.97019	0.36538
Fe3S4Tl2	icsd_041430	Tl			0	0	1	234	orthorhombic	72	Icma (72)	6.659995	19.518731	129.994651	18	0	8.944444	54.254159	47.506867	50.880513	24.423703	21.163398	22.793551	0.912297	59.496239	-0.447214	0	-0.894427	-1	0	0	41.761247	106.760592	56.298357	13.116243	0.232977	43.754505	80.57841	0.543005	127.73803	35.68642	31.20002	0.37389	-0.63499	-0.27778	35.68642	107.18101	31.43982	-0.46764
Fe6Ge4Li1	icsd_041381	Fe			0	0	1	146	trigonal	166	R-3m (166)	7.662658	12.461955	95.491698	11	0	8	157.637907	156.074096	156.856001	71.917952	62.828184	67.373068	0.733403	176.805296	-0.174078	-0.696311	0.696311	-0.86164	0.492366	-0.123091	123.488717	240.02373	165.537553	31.199906	0.188476	240.021897	220.758022	1.087262	286.32186	130.16235	73.62641	-2.81291	5.71851	-4.24311	130.16235	283.7053	84.87014	5.17812
Ga1Ge1Li1	icsd_025310	Ga	Ge		0	0	1	111	hexagonal	186	P6_3mc (186)	4.663855	17.719611	82.641694	6	0	6.666667	50.417273	49.2941	49.855686	34.072658	32.300914	33.186786	0.297041	81.480912	0	-1	0	0	0	-1	71.091495	93.005334	79.805514	3.797109	0.04758	93.005334	76.831534	1.21051	101.8368	49.56936	15.1701	0.01482	-0.0439	-0.15109	49.56936	95.87405	15.22195	0.00408
Ga1Ge1Mn1	icsd_634253	Mn	Ga	Ge	0	0	1	111	tetragonal	129	P4/nmm (129)	7.197405	15.173342	109.208679	6	0	10	121.637207	119.464001	120.550604	74.109984	70.23351	72.171747	0.294162	180.495337	-0.707107	0.707107	0	0	0	-1	123.135501	224.414371	175.038173	21.625814	0.123549	224.414371	163.250025	1.374667	225.91544	48.17023	70.87371	-0.09935	0.1698	8.65741	48.17023	226.02215	71.16685	0.03988
Ga1Ge1Sr1	icsd_634281	Sr			0	0	1	111	hexagonal	194	P6_3/mmc (194)	4.945985	25.737757	127.298564	12	0	9.833333	45.162506	42.299832	43.731169	33.386905	32.919526	33.153216	0.138664	79.395924	0	0	-1	-0.242536	-0.970143	0	61.86833	89.245248	79.306527	7.009983	0.088391	61.86833	88.052415	0.702631	99.25398	33.63467	18.05046	0.04665	0.01501	0.00876	33.63467	102.61846	17.34355	0.04708
Ga1In1O3	icsd_030339	In			0	0	1	113	hexagonal	194	P6_3/mmc (194)	6.44068	11.99067	77.228072	10	1.3903	4.4	169.349392	169.185255	169.267324	75.457679	73.580415	74.519047	0.128536	194.948755	-0.496139	-0.868243	0	-0.371391	0.557086	-0.742781	174.541774	210.80476	196.056925	12.469051	0.063599	184.533574	174.601922	1.056882	260.26344	134.10633	119.55196	-0.00609	0.01507	-0.02936	134.10633	260.364	119.58597	-0.00382
Ga1K1S2	icsd_049546	S			-1	4	4	112	monoclinic	9	Cc (9)	2.778608	25.839591	71.798085	32	2.5413	5.34375	28.648104	28.521096	28.5846	16.229923	14.607625	15.418774	0.559745	39.206824	-0.316228	-0.948683	0	-0.117041	0.702247	0.702247	31.792505	57.575238	38.797926	6.154561	0.158631	57.283001	43.830315	1.306927	47.15423	17.05229	17.00125	0.01199	0.01856	0.72331	17.05229	46.63284	24.53538	0.00651
Ga1K1S2	icsd_107928	K	Ga		0	0	1	112	monoclinic	15	C2/c (15)	2.778581	25.839838	71.798085	32	2.5425	4.90625	28.702854	28.579544	28.641199	16.228615	14.608104	15.418359	0.558976	39.217742	0	-0.894427	0.447214	-0.707107	0.707107	0	31.816196	57.587796	38.757237	6.105111	0.157522	39.609668	44.954294	0.88111	46.90625	24.80929	16.82414	0.1151	0.06144	-0.0222	24.80929	46.94107	16.84903	0.11638
Ga1K1Te2	icsd_411170	K	Ga		0	0	1	112	monoclinic	15	C2/c (15)	4.080794	37.031489	151.117872	32	1.25	4.875	17.773388	17.416892	17.59514	8.281635	6.229709	7.255672	1.667356	19.136578	-0.857493	0	0.514496	-0.707107	0.707107	0	12.457169	35.787913	17.700627	5.195522	0.293522	20.781795	25.458482	0.816301	28.07965	17.40694	11.05401	0.03335	0.67502	-0.01683	17.40694	27.71956	10.37978	0.04952
Ga1La1O3	icsd_160235	Ga			0	0	1	113	orthorhombic	62	Pbnm (62)	6.891498	12.367079	85.227708	20	3.2539	4.8	152.932576	150.591341	151.761958	78.909707	76.298371	77.604039	0.186674	198.908003	-0.6	0.8	0	-0.780869	0	-0.624695	165.60145	229.675978	199.824541	17.002494	0.085087	170.356011	175.388734	0.971305	274.43144	93.71568	125.61796	-0.02039	-0.00292	0.02448	93.71568	222.73652	98.3034	-0.01247
Ga1Li1O2	icsd_028388	Li	Ga		0	0	1	112	trigonal	166	R-3m (166)	4.894644	9.216134	45.109698	4	3.7461	6	130.677196	121.965812	126.321504	86.357489	66.942016	76.649753	1.521596	191.264004	0	-0.743294	0.668965	0	-0.986394	-0.164399	113.618892	294.527153	174.951184	49.90861	0.285272	199.774934	264.483134	0.755341	314.46354	92.83299	38.56741	-23.424	0.03212	-0.03778	92.83299	314.62108	38.56595	23.57605
Ga1N1Ti2	icsd_634721	Ti	Ga		0	0	1	112	hexagonal	194	P6_3/mmc (194)	5.508732	13.524277	74.501608	8	0	7.375	155.696119	155.663607	155.679863	108.721381	108.529051	108.625216	0.00907	264.384461	-0.476731	0.190693	-0.858116	-0.913812	-0.406138	0	253.495872	274.749452	264.097404	5.592987	0.021178	255.47876	271.643601	0.940492	307.84246	79.81483	83.30718	0.02815	0.00232	1.00128	79.81483	304.62804	85.14828	0.02343
Ga1O3Y1	icsd_001999	Y			0	0	1	113	hexagonal	185	P6_3cm (185)	5.258553	13.049681	68.622446	30	2.731	3.933333	153.706246	147.273348	150.489797	73.721701	67.708008	70.714855	0.48777	183.415677	-0.274721	0.961524	0	-0.65561	0.093659	-0.749269	140.256412	222.091775	186.047593	28.461999	0.152982	162.998559	140.316345	1.161651	207.79955	93.04634	127.66101	-0.02465	-0.00278	0.01298	93.04634	207.64976	127.59124	-0.02281
Ga1Rb1S2	icsd_170788	Rb	Ga	S	0	0	1	112	monoclinic	15	C2/c (15)	3.316757	27.450812	91.047674	32	2.483	7.4375	27.059929	27.03505	27.04749	15.679709	14.367474	15.023591	0.457589	38.02957	-1	0	0	-0.707107	0.707107	0	30.643438	52.660634	37.907564	5.090624	0.13429	37.369464	41.763588	0.894786	43.53129	22.06931	16.62643	-0.04643	0.01764	-0.02233	22.06931	43.54476	16.63538	-0.04212
Ga1S2Tl1	icsd_635281	Tl	S		0	0	1	112	monoclinic	15	C2/c (15)	5.33205	26.333892	140.413623	32	2.0003	7.4375	22.27279	21.455422	21.864106	11.61165	9.749381	10.680515	0.993167	27.554756	0	-0.707107	0.707107	-0.707107	-0.707107	0	19.603325	46.622729	26.467712	6.328306	0.239095	26.647269	36.379795	0.732474	37.95063	20.79332	12.4325	0.06224	-1.30493	0.00279	20.79332	39.16033	12.46623	0.05239
[truncated: 565 more rows]
[truncated: 78 more columns]
